# Supplementary material
Source: publisher figshare collection journal article supplement (https://gsajournals.figshare.com/ndownloader/files/15347546)
Supplement: Supplementary file 1 [file 15347546]

locus_name,,aeth_2,aeth_1,aeth_12,aeth_15,aeth_14,aeth_17,aeth_6,aeth_16,aeth_18,aeth_3,aeth_CYP-1,aeth_119,aeth_11,aeth_117,aeth_237,aeth_116,aeth_235,aeth_113,aeth_234,aeth_112,aeth_233,aeth_111,aeth_232,aeth_231,aeth_230,aeth_8,aeth_109,aeth_228,aeth_106,aeth_227,aeth_105,aeth_226,aeth_225,aeth_103,aeth_102,aeth_223,aeth_222,aeth_101,aeth_100,aeth_220,aeth_34,aeth_37,aeth_39,aeth_31,aeth_219,aeth_30,aeth_218,aeth_33,aeth_215,aeth_213,aeth_212,aeth_211,aeth_24,aeth_26,aeth_25,aeth_28,aeth_29,aeth_209,aeth_208,aeth_20,aeth_21,aeth_205,aeth_204,aeth_203,aeth_202,aeth_57,aeth_59,aeth_51,aeth_50,aeth_53,aeth_52,aeth_55,aeth_46,aeth_45,aeth_48,aeth_47,aeth_49,aeth_TUR-1,aeth_40,aeth_42,aeth_41,aeth_44,aeth_71,aeth_70,aeth_73,aeth_72,aeth_75,aeth_74,aeth_77,aeth_76,aeth_80,aeth_68,aeth_67,aeth_69,aeth_60,aeth_62,aeth_61,aeth_64,aeth_63,aeth_92,aeth_95,aeth_96,aeth_99,aeth_98,aeth_199,aeth_198,aeth_195,aeth_193,aeth_192,aeth_190,aeth_82,aeth_84,aeth_85,aeth_88,aeth_87,aeth_189,aeth_188,aeth_91,aeth_186,aeth_184,aeth_182,aeth_181,aeth_180,aeth_179,aeth_178,aeth_177,aeth_175,aeth_173,aeth_172,aeth_171,aeth_169,aeth_168,aeth_166,aeth_165,aeth_164,aeth_163,aeth_161,aeth_160,aeth_159,aeth_158,aeth_157,aeth_156,aeth_155,aeth_154,aeth_153,aeth_152,aeth_150,aeth_149,aeth_148,aeth_147,aeth_145,aeth_144,aeth_143,aeth_142,aeth_141,aeth_139,aeth_136,aeth_132,aeth_129,aeth_128,aeth_127,aeth_125,aeth_124,aeth_123,aeth_122,aeth_121,aeth_241,aeth_120,aeth_240
S1_89619,,B,B,-,B,A,A,A,B,A,A,B,B,B,A,A,B,A,A,B,A,A,B,B,B,A,A,B,A,B,B,-,A,B,A,B,A,A,B,A,B,A,B,A,A,A,B,B,B,B,A,A,B,A,B,A,B,A,B,A,B,A,A,A,B,A,A,B,A,B,A,B,A,A,B,B,B,B,A,A,-,A,A,B,A,A,A,A,A,A,A,B,B,B,B,B,B,A,A,B,A,B,A,A,A,B,B,A,A,B,A,B,-,A,A,A,A,B,B,B,A,A,A,B,B,B,A,B,B,A,A,B,B,B,B,A,B,B,B,A,B,-,A,-,B,A,A,A,B,A,B,B,A,A,B,B,B,A,B,A,B,A,B,A,A,-,B,A,B,B
S1_194034,,-,B,-,B,A,A,A,B,A,A,B,B,B,A,A,B,A,A,B,A,A,B,-,B,A,A,B,A,B,B,-,A,B,A,B,A,A,B,A,B,A,B,A,A,A,B,B,B,B,A,A,B,A,B,A,B,A,B,A,B,A,A,A,B,A,A,B,A,B,A,B,A,A,B,B,B,B,A,A,B,A,A,B,A,A,A,A,A,A,A,B,B,B,B,B,B,A,A,B,A,B,A,A,A,B,B,A,A,B,A,B,-,A,A,A,A,B,B,B,A,A,A,B,B,B,A,B,B,A,A,B,B,B,B,-,B,B,B,B,B,-,A,-,B,A,A,A,B,-,B,B,A,A,B,B,B,A,B,A,B,A,B,A,A,B,B,A,B,B
S1_272362,,-,B,-,B,-,A,-,B,A,A,B,-,B,A,A,B,A,A,B,A,A,B,-,B,A,A,B,A,B,B,A,-,-,A,B,A,A,B,A,B,A,B,A,A,A,B,B,B,B,-,A,B,A,B,B,B,A,B,A,A,A,A,-,B,A,-,B,A,B,A,B,A,A,-,B,B,B,A,-,-,-,A,B,A,A,A,A,-,A,A,B,B,B,B,-,B,A,A,B,A,B,A,-,A,B,B,-,A,B,-,B,-,A,A,-,A,B,B,B,-,A,A,B,B,B,A,B,B,A,A,B,B,B,B,A,-,B,B,-,B,-,A,-,B,-,A,A,B,-,B,B,-,A,B,-,B,A,-,-,B,A,B,A,A,-,B,A,B,A
S1_296677,,-,B,-,B,A,A,A,B,A,A,B,B,B,A,A,B,A,A,B,A,A,B,B,B,A,A,B,A,B,-,-,A,B,A,B,A,A,B,A,B,A,B,A,A,A,B,B,B,B,A,A,B,A,B,B,B,A,B,A,A,A,A,A,B,A,A,B,A,B,A,B,A,A,B,B,B,B,A,A,B,A,A,B,A,A,A,A,A,A,A,B,B,B,B,B,B,A,A,B,A,B,A,A,A,B,B,A,A,B,A,B,-,A,A,A,A,B,B,B,A,A,A,B,B,B,A,B,B,A,A,B,B,B,B,-,B,B,B,-,B,-,A,-,B,B,A,A,B,-,B,B,A,A,B,B,B,A,B,A,A,A,B,A,A,-,B,A,B,A
S1_304069,,-,B,-,B,A,A,-,B,A,A,B,-,B,A,A,B,-,A,B,A,A,B,-,B,A,A,B,-,B,-,B,A,B,A,B,A,A,B,A,B,A,B,A,A,-,B,B,B,B,A,A,B,A,B,B,B,A,B,A,A,A,A,A,B,A,A,B,-,B,A,B,A,A,B,B,B,B,A,A,-,-,A,B,A,A,A,A,A,A,A,B,B,B,B,B,B,A,A,B,A,B,A,A,A,B,B,A,A,B,A,B,-,A,A,A,-,B,B,B,A,A,A,B,B,B,-,B,B,-,A,B,B,B,B,A,-,B,B,-,B,B,A,-,B,B,A,A,B,-,B,B,A,A,B,B,B,A,B,A,A,A,B,A,A,-,B,A,B,A
S1_317433,,-,B,-,B,A,A,A,B,A,A,B,-,B,A,A,B,A,-,B,A,A,-,-,B,A,A,B,A,B,-,-,A,-,B,B,A,A,-,A,B,A,B,A,A,-,B,B,B,B,A,A,B,A,B,A,B,A,B,A,A,A,A,A,B,-,A,B,A,B,A,B,B,A,-,B,B,B,A,A,-,A,A,B,A,A,A,-,A,A,A,B,B,-,B,B,B,A,A,B,-,B,A,A,A,B,-,A,A,B,A,-,-,A,A,A,A,B,A,-,A,A,A,B,B,B,A,B,B,A,A,B,B,B,-,A,-,B,B,-,B,-,A,-,B,B,A,A,B,-,A,B,A,A,B,B,B,A,-,A,A,A,B,A,B,-,B,A,B,A
S1_322156,,-,B,-,B,A,A,A,B,A,A,B,B,B,A,A,B,A,A,B,A,A,B,B,B,A,A,B,A,B,-,-,A,B,B,B,A,A,B,A,B,A,B,A,A,A,B,B,B,B,A,A,B,A,B,A,B,A,B,A,A,A,A,A,B,A,A,B,A,B,A,B,B,A,B,B,B,B,A,A,B,A,A,B,A,A,A,A,A,A,A,B,B,B,B,B,B,A,A,B,A,B,A,A,A,B,B,A,A,B,A,B,-,A,A,A,A,B,A,B,A,A,A,B,B,B,A,B,B,A,A,B,B,B,B,-,B,B,B,A,B,-,A,-,B,B,A,A,B,-,A,B,A,A,B,B,B,A,-,A,A,A,B,A,B,-,B,A,B,A
S1_371679,,-,B,-,B,A,A,A,B,A,A,B,B,B,A,A,B,A,A,B,A,A,B,-,A,A,A,B,A,B,A,A,A,A,B,B,A,A,B,A,B,A,B,A,A,A,B,B,B,B,A,A,B,A,B,A,B,A,B,A,A,A,A,-,B,A,A,B,A,B,A,B,B,A,-,A,B,B,A,A,-,A,A,B,A,A,A,A,A,A,A,B,B,B,B,B,B,A,A,B,A,B,A,A,A,B,B,A,A,B,A,B,-,A,A,A,A,B,A,B,A,A,A,B,B,B,A,B,B,A,A,B,B,B,B,A,B,B,B,-,B,A,A,-,B,B,A,A,B,-,A,B,A,A,B,B,B,A,B,A,A,A,B,A,B,-,B,A,A,A
S1_445179,,B,B,-,B,-,A,A,B,A,A,B,B,B,A,-,B,A,A,B,A,A,B,B,A,A,A,B,A,B,A,A,A,A,B,B,A,B,-,A,B,A,B,A,A,A,B,B,A,B,A,A,B,A,B,A,B,A,B,A,A,A,A,A,B,A,A,B,A,B,A,B,B,A,B,A,B,B,A,A,-,B,A,B,A,A,A,A,A,A,A,-,B,B,B,B,B,A,A,B,A,B,A,A,A,B,B,A,A,B,A,B,-,A,A,A,A,B,A,B,A,A,A,B,B,B,A,B,B,A,A,B,B,B,B,A,B,B,B,-,B,-,A,-,A,B,A,A,B,-,A,B,A,A,B,B,B,A,A,A,A,A,B,A,B,-,B,A,-,A
S1_452158,,-,B,-,B,A,A,A,B,A,A,B,B,B,A,A,B,A,A,B,A,A,B,A,A,A,A,B,A,B,A,-,A,A,B,B,A,B,-,A,B,A,B,A,A,A,B,B,A,B,A,A,B,A,B,A,B,A,B,A,A,A,A,-,B,A,A,B,A,B,A,B,B,A,B,A,B,B,A,A,-,B,A,B,A,A,A,A,A,A,A,B,B,B,B,B,B,A,A,B,A,B,A,A,A,B,B,A,A,B,A,B,-,A,A,A,-,B,A,B,A,A,A,B,B,B,A,B,B,A,A,B,B,B,B,A,-,B,B,B,B,-,A,-,A,B,A,A,B,-,A,B,A,A,B,B,B,A,A,A,A,A,B,A,B,-,B,A,-,A
S1_469178,,B,B,-,B,A,A,A,B,A,A,B,B,B,A,A,B,A,A,B,A,A,B,B,A,A,A,B,A,B,A,-,A,A,B,B,A,B,B,A,B,A,B,A,A,A,B,B,A,B,A,A,B,A,B,A,B,A,B,A,A,A,A,A,B,A,A,B,A,B,A,B,B,A,-,A,B,B,A,A,-,A,A,B,A,A,A,A,A,A,A,B,B,B,B,B,B,A,A,B,A,B,A,A,A,B,B,A,A,B,A,B,B,A,A,A,A,B,A,B,A,A,A,B,B,B,A,B,B,A,A,B,B,B,B,A,-,B,B,B,B,-,A,-,A,B,A,A,B,-,A,B,A,A,B,-,B,A,A,A,A,A,B,A,B,B,B,A,-,A
S1_478661,,-,B,-,-,-,A,A,B,A,A,B,B,B,A,A,B,A,A,B,-,A,B,-,A,A,A,B,-,B,-,-,A,-,B,B,A,B,-,A,B,A,B,A,A,A,-,B,A,-,A,A,-,A,B,A,B,-,B,A,A,A,A,-,-,A,-,-,-,B,A,B,B,A,-,A,B,B,A,A,-,A,-,B,A,A,A,A,A,A,A,B,B,B,B,B,B,A,A,B,A,B,A,A,A,B,B,-,A,B,A,B,-,A,A,A,A,B,A,B,-,A,A,B,B,B,A,B,B,A,A,B,B,B,B,A,B,B,B,-,B,-,A,-,A,B,-,A,B,-,A,B,-,A,B,-,-,A,A,A,A,A,B,A,B,-,B,A,-,A
S1_488566,,-,B,-,B,A,A,A,B,A,A,B,B,B,A,A,B,A,A,B,A,A,B,-,A,A,A,B,A,B,A,A,A,A,B,B,A,B,B,A,B,A,B,A,A,A,B,B,A,B,A,A,B,A,B,A,B,A,B,A,A,A,-,-,B,A,A,B,A,B,A,B,B,A,B,A,B,B,A,A,-,A,A,B,A,A,A,A,A,A,A,B,B,B,B,B,B,A,A,B,A,B,A,A,A,B,B,A,A,B,A,B,-,A,A,A,A,B,A,B,A,A,A,B,B,B,A,B,B,A,A,B,B,B,B,A,-,B,B,B,B,-,A,-,A,B,A,A,B,-,A,B,A,A,B,B,B,A,A,A,A,A,B,A,B,-,B,A,-,A
S1_489781,,-,B,-,B,-,A,A,B,A,A,B,-,B,A,-,B,A,A,B,A,A,B,-,A,A,A,B,A,B,A,-,A,A,B,B,A,B,B,A,B,A,B,A,A,A,B,B,A,B,A,A,B,A,B,A,B,A,B,A,A,A,A,-,B,A,A,B,A,B,A,B,B,A,-,A,B,B,A,A,-,A,A,B,A,A,A,A,A,A,A,-,B,B,B,B,B,A,A,-,A,B,A,A,A,B,B,A,A,-,A,B,-,A,A,A,A,B,A,-,A,A,A,B,B,B,A,B,B,-,A,B,B,B,-,-,B,B,B,B,B,-,A,-,A,B,A,A,B,-,A,B,A,A,B,B,B,A,A,A,A,A,B,A,B,-,B,A,-,A
S1_500605,,-,B,-,B,A,A,A,B,A,A,B,B,B,A,A,B,A,A,B,A,A,B,B,A,A,A,B,A,B,A,-,A,A,B,B,A,B,B,A,B,A,B,A,A,A,B,B,A,B,A,A,B,A,B,A,B,A,B,A,A,A,A,A,B,A,A,B,A,B,A,B,B,A,B,A,B,B,A,A,-,A,A,B,A,A,A,A,A,A,A,B,B,B,B,B,B,A,A,B,A,B,A,A,A,B,B,A,A,B,A,B,B,A,A,A,A,B,A,B,A,A,A,B,B,B,A,B,B,A,A,B,B,B,B,A,-,B,B,B,B,-,A,-,A,B,A,A,B,-,A,B,A,A,B,-,B,A,A,A,A,A,B,A,B,-,B,A,-,A
S1_528840,,-,B,-,B,-,A,A,B,A,A,B,B,B,A,-,B,A,A,B,A,A,B,-,A,A,A,B,A,B,A,-,A,A,B,B,A,B,B,A,B,A,B,A,A,A,B,B,A,B,A,A,B,A,B,A,B,A,B,A,A,A,A,-,B,A,A,B,A,B,A,B,B,A,B,A,B,B,A,A,-,A,A,B,A,A,A,A,A,A,A,-,B,B,B,B,B,-,A,B,A,B,A,A,A,B,B,A,A,B,A,B,-,A,B,A,A,B,A,B,A,A,A,B,B,B,A,B,B,A,A,B,B,B,B,A,-,B,B,-,B,-,A,-,A,B,A,A,B,-,A,B,A,A,B,-,B,A,A,A,A,A,B,A,B,-,B,A,-,A
S1_538633,,-,B,-,B,A,A,A,B,A,A,B,B,B,A,A,B,A,A,B,A,A,B,-,A,A,A,B,A,B,A,-,A,A,B,B,A,B,B,A,B,A,B,A,A,A,B,B,A,B,A,A,B,A,B,A,B,A,B,A,A,A,A,A,B,A,A,B,A,B,A,B,B,A,B,A,B,B,A,A,B,A,A,B,A,A,A,A,A,A,A,B,B,B,B,B,B,A,A,B,A,B,A,A,A,B,B,A,A,B,A,B,B,A,B,A,A,B,A,B,A,A,A,B,B,B,A,B,B,A,A,B,B,B,B,A,B,B,B,B,B,-,A,-,A,B,A,A,B,-,A,B,A,A,B,-,B,A,A,A,A,A,B,A,B,B,B,A,-,A
S1_562461,,-,B,-,B,A,A,A,B,A,A,B,-,B,A,A,B,A,A,B,-,A,B,-,A,B,A,B,A,B,A,A,A,-,B,B,A,B,-,A,B,A,B,A,A,A,B,B,A,B,A,A,B,A,B,A,B,A,B,A,A,A,A,A,B,A,A,-,A,B,A,B,B,A,-,A,B,B,A,A,-,A,A,B,A,A,A,A,A,A,A,-,B,B,B,B,B,A,A,B,A,B,A,A,A,B,B,A,A,B,A,B,-,A,B,A,-,B,A,B,A,A,A,B,B,B,A,B,B,B,A,B,B,B,B,A,-,B,B,-,B,-,A,-,A,B,A,A,-,-,A,B,A,A,B,A,B,A,-,A,A,A,B,A,B,-,B,A,-,A
S1_570773,,-,B,-,B,A,A,A,B,A,A,B,B,B,A,A,B,A,A,B,A,A,B,-,A,B,A,B,A,B,A,-,A,A,B,B,A,B,A,A,B,A,B,A,A,A,B,B,A,B,A,A,B,A,B,A,B,A,B,A,A,A,A,-,B,A,A,B,A,B,A,B,B,A,-,A,B,B,A,A,-,A,A,B,A,A,A,A,A,A,A,B,B,B,B,B,B,A,A,B,A,B,A,A,A,B,B,A,A,B,A,B,B,A,B,A,A,B,A,B,A,A,A,B,B,B,A,B,B,B,A,B,B,B,B,A,B,B,B,B,B,-,A,-,A,B,A,A,-,-,A,B,A,A,B,A,B,A,A,A,A,A,B,A,B,B,B,A,-,A
S1_622915,,B,B,-,B,A,A,A,B,A,A,B,B,B,A,A,B,A,A,B,A,A,B,-,A,B,A,B,A,B,A,-,A,A,B,B,A,B,A,A,B,A,A,A,A,A,B,B,A,B,A,A,B,A,B,A,B,A,B,A,A,B,A,A,B,A,A,B,A,B,A,B,B,A,B,A,B,B,A,A,B,A,A,B,A,A,A,A,A,A,A,B,B,B,B,B,B,A,A,B,A,B,A,A,A,B,B,A,A,B,A,B,-,A,B,A,A,B,A,B,A,A,A,B,B,B,A,B,B,B,A,B,B,B,B,A,B,B,B,B,B,-,A,-,A,B,A,A,A,-,A,B,A,A,B,A,B,A,A,A,A,A,B,A,B,-,B,A,-,A
S1_659241,,-,B,-,B,A,A,A,B,-,-,B,B,B,A,-,B,A,A,B,A,A,B,A,A,B,A,B,B,B,A,A,A,A,B,B,A,B,-,A,B,A,A,A,A,A,B,B,A,B,A,A,B,A,B,A,B,A,B,A,A,B,A,-,B,A,A,B,A,B,A,B,B,A,-,A,B,B,A,A,-,A,A,B,A,A,A,A,A,A,A,B,B,B,B,B,B,A,A,B,A,B,A,A,A,B,-,A,A,B,A,B,-,A,B,A,A,-,A,B,A,A,A,B,B,B,A,B,B,-,A,B,B,B,B,A,-,B,B,-,B,-,A,-,-,B,A,A,-,-,-,B,A,A,B,-,B,A,A,A,A,A,-,A,B,-,B,A,B,-
S1_679001,,-,B,-,B,-,A,-,B,A,A,B,B,B,A,A,B,A,A,B,A,A,B,-,A,B,A,B,B,B,A,A,A,A,B,B,A,B,A,A,B,A,A,A,A,A,B,B,A,B,A,A,B,A,B,A,B,A,B,A,A,B,A,A,B,A,A,B,A,B,A,B,B,A,B,A,B,B,A,A,-,A,A,B,A,A,A,A,A,A,A,B,B,B,B,B,B,A,A,B,A,B,A,A,A,B,B,A,A,B,A,B,-,A,B,A,A,B,A,B,A,A,A,B,B,B,A,B,B,B,A,B,B,B,B,A,B,B,B,-,B,-,A,-,A,B,A,A,-,-,A,B,-,A,-,A,B,A,A,A,A,A,B,A,B,-,B,A,-,A
S1_684821,,-,B,-,B,A,A,A,B,A,A,B,B,B,A,A,B,A,A,B,A,A,B,-,A,B,A,B,B,B,A,-,A,A,B,B,A,B,A,A,B,A,A,A,A,A,B,B,A,B,A,A,B,A,B,A,B,A,B,A,A,B,A,A,B,A,A,B,A,B,A,B,B,A,B,A,B,B,A,A,-,A,A,B,A,A,A,A,A,A,A,B,B,B,B,B,B,A,A,B,A,B,A,A,A,B,B,A,A,B,A,B,B,A,B,A,A,B,A,B,A,A,A,B,B,B,A,B,B,B,A,B,B,B,B,A,-,B,B,B,B,-,A,-,A,B,A,A,-,-,A,B,A,A,-,A,B,A,A,A,A,A,B,A,B,-,B,A,-,A
S1_688525,,-,B,-,B,A,A,A,B,-,A,-,B,B,A,A,B,A,A,-,A,A,B,-,A,B,-,B,-,B,A,A,A,-,B,B,A,B,A,A,B,A,-,A,A,-,B,B,A,B,A,A,B,A,B,A,B,-,B,A,B,B,A,-,B,A,-,B,A,B,A,B,B,A,-,A,B,B,A,A,-,A,A,B,A,-,B,A,A,A,A,B,B,B,B,B,B,A,A,B,A,B,A,A,A,B,B,A,A,-,A,B,-,A,B,A,A,B,A,B,A,A,A,B,B,B,A,B,-,B,A,B,B,B,B,A,-,B,B,-,-,-,A,-,A,B,A,-,B,-,A,B,A,A,-,A,B,A,A,A,A,A,B,A,B,-,B,-,-,-
S1_735215,,-,B,-,-,A,A,A,B,A,A,B,-,B,A,-,B,A,A,B,A,A,-,-,A,B,A,B,B,B,A,A,A,-,B,-,A,B,-,A,B,A,A,A,A,-,B,B,A,B,A,A,B,A,B,A,B,A,B,A,B,-,A,-,B,A,-,B,A,B,A,B,B,A,-,A,B,B,A,A,-,A,A,B,A,-,B,A,A,A,-,-,B,B,B,B,B,A,A,B,A,B,A,A,A,B,B,A,-,-,A,B,-,A,B,A,A,B,A,-,-,A,A,B,B,B,A,B,B,-,A,-,B,B,B,A,-,B,B,-,B,-,A,-,A,B,A,A,-,-,A,A,A,A,-,A,B,A,-,A,A,A,B,-,B,-,B,-,B,A
S1_789087,,-,B,-,B,A,A,A,B,A,A,B,A,B,A,A,B,A,A,B,A,A,B,A,A,B,A,B,B,B,A,B,A,A,B,B,A,B,A,A,B,A,A,A,A,A,B,B,A,B,A,A,B,A,B,A,B,A,B,A,B,B,A,B,B,A,A,B,A,B,A,B,B,A,B,A,B,B,A,A,-,A,A,B,A,A,B,A,A,A,A,B,B,B,B,B,B,A,A,B,A,B,A,A,A,B,A,A,A,B,A,B,-,A,B,A,A,B,A,B,A,A,A,B,B,B,A,B,A,B,A,B,B,B,B,A,B,B,B,B,B,-,A,-,A,B,A,A,A,B,A,B,A,A,-,A,B,A,A,A,A,A,B,A,B,-,B,A,B,A
S1_823294,,-,B,-,B,A,A,A,B,A,A,B,-,B,A,A,B,B,A,B,A,A,B,-,A,B,A,B,-,B,A,-,A,A,B,B,A,-,-,A,B,A,A,A,-,-,B,B,A,B,A,A,B,A,-,A,B,A,-,A,B,-,A,-,B,A,-,-,A,B,A,B,B,A,-,A,B,B,A,A,B,A,-,B,A,A,B,-,A,A,A,-,B,B,B,B,B,A,A,B,-,B,A,A,A,B,A,A,A,B,A,B,-,B,B,A,-,B,A,B,A,A,A,B,B,B,A,B,A,-,A,B,B,B,B,A,B,B,B,-,B,-,A,-,A,B,A,A,A,-,A,B,A,A,B,A,B,A,A,A,A,A,B,A,B,-,B,A,B,A
S1_836130,,-,B,-,B,A,A,A,B,A,A,B,A,B,A,A,B,B,A,B,A,A,B,-,A,B,A,B,B,B,A,B,A,-,B,B,A,B,-,A,B,A,A,A,A,A,B,B,A,B,A,A,B,A,B,A,B,A,B,A,B,-,A,-,B,A,A,B,A,B,A,B,B,A,B,A,B,B,A,A,-,A,A,B,A,A,B,A,A,A,A,-,B,-,B,B,B,A,A,B,A,-,A,A,-,B,A,A,A,B,A,B,-,B,B,A,A,B,A,B,A,A,A,B,B,B,A,B,A,B,A,B,B,B,B,A,B,B,B,-,B,-,A,-,A,B,A,A,A,-,B,B,-,A,-,A,B,A,-,A,A,A,B,A,B,-,B,A,B,A
S1_840055,,-,B,-,B,A,A,A,B,A,A,B,A,B,A,A,B,B,A,B,A,A,B,A,A,B,A,B,B,B,A,B,A,A,B,B,A,B,A,A,B,A,A,A,A,A,B,B,A,B,A,A,B,A,B,A,B,A,B,A,B,B,A,B,B,A,A,B,A,B,A,B,B,A,B,A,B,B,A,A,B,A,A,B,A,A,B,A,A,A,A,B,B,A,B,B,B,A,A,B,A,B,A,A,A,B,A,A,A,B,A,B,B,B,B,A,A,B,A,B,A,A,A,B,B,B,A,B,A,B,A,B,B,B,B,A,B,B,B,B,B,-,A,-,A,B,A,A,A,-,B,B,A,A,-,A,B,A,A,A,A,A,B,A,B,B,B,A,B,A
S1_871192,,-,B,-,B,A,A,-,B,A,A,B,A,B,A,A,B,B,A,B,A,A,B,A,A,B,A,B,B,B,A,B,A,A,B,B,A,B,A,A,B,A,A,A,A,A,B,B,A,B,A,A,B,A,B,A,B,A,B,A,B,B,A,-,B,A,A,B,A,B,A,B,B,A,B,A,B,B,A,A,-,A,A,B,A,A,A,A,-,A,A,B,B,A,B,B,B,A,A,B,-,B,A,A,A,B,A,A,A,B,A,B,-,A,B,A,A,B,A,B,A,A,A,B,B,B,A,B,A,-,A,B,B,B,B,A,-,B,B,B,B,-,A,-,A,-,A,A,A,-,B,B,A,A,-,A,B,A,A,A,A,A,B,A,B,-,B,A,B,A
S1_885421,,-,B,-,B,-,A,-,B,A,A,B,-,B,A,-,B,B,-,B,A,A,B,-,A,B,A,B,B,B,A,B,A,A,B,B,A,B,-,A,B,A,A,A,A,A,B,B,A,B,A,A,B,A,B,A,B,A,B,A,B,B,A,-,B,A,-,-,A,B,A,B,B,A,-,A,B,B,A,A,-,A,A,B,-,A,A,A,A,A,A,-,B,A,B,B,B,A,A,B,A,B,A,A,A,B,A,A,-,-,A,B,-,A,B,A,A,B,A,B,-,A,A,B,B,B,A,B,-,-,A,B,B,B,B,A,-,B,B,-,B,B,A,-,A,-,A,A,A,-,B,B,A,A,-,A,B,A,A,A,A,A,B,A,B,-,B,A,B,A
S1_886563,,-,B,-,B,A,A,A,B,A,A,B,A,B,A,A,B,B,A,B,A,A,B,A,A,B,A,B,B,B,A,B,A,A,B,B,A,B,A,A,B,A,A,A,A,A,B,B,A,B,A,A,B,A,B,A,B,A,B,A,B,B,A,B,B,A,A,B,A,B,A,B,B,A,-,A,B,B,A,A,-,A,A,B,A,A,A,A,A,A,A,B,B,A,B,B,B,A,A,B,A,B,A,A,A,B,A,A,A,B,A,B,-,A,B,A,A,B,A,B,A,A,A,B,B,B,A,B,A,B,A,B,B,B,B,A,-,B,B,-,B,-,A,-,A,B,A,A,A,-,B,B,A,A,-,A,B,A,A,A,A,A,B,A,B,-,B,A,B,A
S2_31602,,B,B,-,A,B,A,A,A,A,A,B,-,A,B,B,B,A,B,B,B,A,A,A,B,B,A,B,A,A,A,B,A,A,B,A,A,A,A,B,A,A,A,A,B,A,A,A,B,A,A,B,B,A,B,A,B,-,B,B,B,A,A,-,A,B,B,B,A,B,A,A,A,A,-,A,A,B,A,A,-,A,A,B,B,B,B,A,B,A,A,B,A,A,A,B,A,B,A,B,B,B,B,A,B,B,B,B,A,A,A,B,-,A,B,A,A,B,A,B,B,A,A,A,A,A,A,A,A,A,A,B,B,B,A,B,B,B,B,B,A,A,B,-,A,B,A,A,A,-,A,B,B,A,A,B,B,B,A,B,A,B,B,A,A,-,B,A,B,B
S2_82521,,B,B,-,A,B,A,A,A,B,A,B,-,A,B,-,B,A,B,B,B,A,A,-,B,B,A,B,A,A,A,B,A,A,B,A,A,A,A,B,A,A,A,A,B,A,A,A,B,A,A,B,B,A,B,A,B,-,B,B,B,A,A,-,A,B,B,B,A,B,A,A,A,A,A,A,A,B,A,A,A,A,A,B,B,B,B,A,B,A,A,B,A,A,A,B,A,B,A,B,B,B,B,A,B,B,B,B,A,A,A,B,-,A,B,A,A,B,A,B,-,A,A,A,A,A,A,A,A,A,A,B,A,B,A,B,B,B,B,B,A,A,B,-,A,-,A,A,A,-,A,B,B,A,A,B,-,B,A,B,A,B,B,A,A,-,B,A,B,B
S2_97043,,-,B,-,A,B,A,A,A,B,-,B,-,A,B,B,B,A,B,B,B,A,A,-,B,B,A,B,A,A,A,B,A,A,B,A,A,A,A,B,A,A,A,A,B,A,A,A,B,A,A,B,B,A,B,A,B,B,B,B,B,A,A,-,-,B,B,B,A,B,A,A,A,A,-,A,A,B,A,A,-,A,-,B,B,B,B,A,B,A,A,B,A,A,A,B,A,B,A,B,B,B,B,A,B,B,B,B,A,A,A,B,B,A,B,A,A,B,A,B,B,A,A,A,A,A,A,A,A,A,-,B,A,B,A,B,B,B,B,B,A,A,B,-,A,B,A,A,A,-,A,B,B,A,A,B,B,B,A,B,A,B,B,A,A,-,B,A,B,B
S2_115950,,-,B,-,A,-,A,A,A,B,A,B,A,A,B,B,B,A,B,B,B,A,A,-,B,B,A,B,A,A,A,B,A,A,B,A,A,A,A,B,A,A,A,A,B,A,A,A,B,A,A,B,B,A,B,A,B,A,B,B,B,A,A,A,A,B,-,B,A,B,A,A,A,A,-,A,A,B,A,A,-,A,A,B,B,B,B,A,B,A,A,B,A,A,A,B,A,B,A,B,B,B,B,A,B,B,B,B,A,A,A,B,-,A,B,A,A,B,A,B,B,A,A,A,A,A,A,A,A,A,A,B,A,B,A,B,B,B,B,-,A,A,B,-,A,B,A,A,A,-,A,B,B,A,A,B,B,B,-,B,A,B,B,A,A,-,B,B,B,B
S2_148587,,-,B,-,A,B,A,A,A,B,A,B,A,A,B,B,B,A,B,B,B,A,A,A,B,B,A,B,A,A,A,B,A,A,B,A,A,A,A,B,A,A,A,A,B,A,A,A,A,A,A,B,B,A,B,A,B,-,B,B,B,A,A,A,A,B,B,B,A,B,A,A,A,A,A,A,A,B,A,A,-,A,A,B,B,B,B,A,B,A,A,B,A,A,A,B,A,B,A,B,B,B,B,A,B,B,B,B,A,A,A,B,B,A,B,A,A,B,A,B,B,A,A,A,A,A,A,A,A,A,A,B,A,B,A,B,B,B,B,-,A,A,B,-,A,-,A,A,A,-,A,-,-,A,A,B,B,B,A,B,A,B,B,A,A,-,B,B,B,B
S2_160219,,-,B,-,A,B,A,A,A,B,A,B,-,A,B,B,B,A,B,B,B,-,A,-,B,B,A,B,A,A,A,B,A,A,B,A,A,A,-,B,A,A,A,A,B,A,A,A,A,A,A,B,B,A,B,A,B,-,B,B,B,A,A,A,A,B,B,B,A,B,A,A,A,A,A,A,A,B,A,A,-,A,A,B,B,B,B,A,B,A,A,B,A,A,A,B,A,B,A,B,B,B,B,A,B,B,B,B,A,A,A,B,-,A,B,A,A,B,A,B,B,A,A,A,A,A,A,A,A,A,A,B,A,B,A,B,B,B,B,B,A,A,B,-,A,B,A,A,A,-,A,-,B,A,A,B,B,B,A,B,A,B,B,A,A,-,B,B,B,B
S2_200735,,-,B,-,A,B,A,A,A,B,A,B,A,A,B,B,B,A,B,B,B,B,A,-,B,B,A,B,A,A,A,B,A,A,B,A,A,A,A,B,A,A,A,A,B,A,A,A,A,A,A,B,B,A,B,B,B,-,B,B,B,B,A,-,A,B,B,B,A,B,A,A,A,A,A,A,A,B,A,A,-,A,A,B,B,B,B,A,B,A,A,B,A,A,A,B,A,B,A,B,B,B,B,A,B,B,B,B,A,-,A,B,B,A,A,A,A,B,A,B,B,A,A,A,A,A,A,A,A,A,A,B,A,B,A,B,B,B,B,B,A,A,B,-,A,B,A,A,A,B,A,A,B,A,A,B,A,A,A,B,A,B,B,B,A,-,B,B,B,B
S2_203777,,-,B,-,A,B,A,A,A,B,A,B,A,A,B,B,B,A,B,B,B,B,A,-,B,B,A,B,A,A,A,B,A,A,B,A,A,A,A,B,A,A,A,A,B,A,A,A,A,A,A,B,B,A,B,B,B,-,B,B,B,B,A,A,A,B,B,B,A,B,A,A,A,A,A,A,A,B,A,A,-,A,A,B,B,B,B,A,B,A,A,B,A,A,A,B,A,B,A,B,B,B,B,A,B,B,B,B,A,A,A,B,-,A,A,A,A,B,A,B,B,A,A,A,A,A,A,A,A,A,A,B,A,B,A,B,B,B,B,B,A,A,B,-,A,B,A,A,A,-,A,-,B,A,A,B,A,A,A,B,A,B,B,B,A,-,B,B,B,B
S2_319519,,-,B,-,A,-,A,A,A,-,-,B,A,A,B,-,B,A,B,B,B,A,A,-,B,B,A,B,A,A,A,-,A,A,B,A,A,A,A,B,A,A,A,A,B,-,A,A,A,A,A,B,B,A,B,B,B,A,B,B,B,-,A,-,A,B,B,-,A,B,A,A,A,A,-,A,A,B,A,A,-,A,A,B,-,B,-,A,B,A,A,B,A,A,A,B,A,B,A,B,B,-,-,A,B,A,B,B,A,A,A,B,-,A,A,A,A,B,A,B,-,A,A,A,A,A,A,A,-,A,B,B,A,B,A,B,-,B,B,-,A,A,B,-,A,B,A,A,A,-,A,B,B,B,A,B,-,A,-,-,A,B,B,B,A,-,B,B,B,B
S2_336759,,-,B,-,A,-,A,-,A,B,A,B,A,A,B,-,B,A,B,B,B,A,A,-,B,B,A,B,A,A,A,B,A,A,B,A,A,A,A,B,A,A,A,A,B,A,A,A,A,A,A,B,B,A,B,B,B,A,B,B,B,B,A,-,A,B,B,B,A,B,A,A,A,A,-,A,A,B,A,A,-,A,A,B,B,B,-,A,B,A,A,B,A,A,A,B,A,B,A,B,B,B,B,A,B,A,B,B,A,A,A,B,-,A,A,A,A,B,A,B,B,A,A,A,A,A,A,A,A,A,B,B,A,B,A,B,-,B,B,B,A,A,B,-,A,B,A,A,A,-,A,B,B,B,A,B,A,A,A,B,A,B,B,B,A,-,B,A,B,B
S2_361780,,-,B,-,A,-,A,B,A,B,A,B,A,A,B,B,B,-,B,B,B,A,A,-,B,B,A,B,-,A,A,-,A,A,B,-,A,-,A,B,A,A,-,-,B,A,A,A,A,B,A,B,B,A,B,B,B,A,B,B,B,B,A,-,A,B,B,B,A,B,A,A,-,A,-,A,A,B,A,A,-,A,A,B,A,B,B,A,B,A,-,B,A,A,A,-,A,B,A,B,-,B,B,A,B,A,B,B,A,-,A,B,-,A,A,A,A,B,A,B,B,A,A,A,A,A,A,A,-,-,-,B,A,B,A,B,B,B,B,B,A,A,B,-,A,A,A,A,A,-,A,B,B,B,A,B,A,A,A,-,A,B,B,B,A,-,B,A,B,B
S2_387979,,A,B,-,A,B,A,A,A,B,A,B,A,A,B,B,B,A,B,B,B,A,A,A,B,B,A,B,A,A,A,B,A,A,B,A,A,A,A,B,A,A,A,A,B,A,A,A,A,B,A,B,B,A,B,B,B,A,B,B,B,-,A,A,A,B,B,-,A,B,A,A,A,A,A,A,A,B,A,A,A,A,A,B,A,B,-,A,B,A,A,B,A,A,A,B,A,-,A,B,-,B,B,A,B,A,B,B,A,A,A,B,-,A,A,A,A,B,A,B,B,A,A,A,A,A,A,A,A,B,B,B,A,B,A,B,-,B,B,-,A,A,B,-,A,A,A,A,A,-,A,B,-,B,A,B,A,A,A,B,A,B,B,B,A,-,B,A,B,B
S2_395116,,A,B,-,A,B,A,A,A,B,A,-,A,A,B,-,B,A,B,B,B,A,A,A,B,B,A,B,A,A,A,B,A,A,B,A,A,A,A,B,A,A,A,A,B,A,A,A,A,B,A,B,B,A,B,B,B,A,B,B,B,B,A,A,A,B,B,B,A,B,A,A,A,A,-,A,A,B,A,A,-,A,A,B,A,B,B,A,B,A,A,B,A,A,A,B,A,B,A,B,B,B,B,A,B,A,B,B,A,A,A,B,B,A,A,A,A,B,A,B,B,A,A,A,A,A,A,A,A,B,B,B,A,B,A,B,-,B,B,-,A,A,B,-,A,A,A,A,A,-,A,B,B,B,A,B,A,A,A,B,A,B,B,B,A,-,B,A,B,B
S2_397451,,-,B,B,A,B,A,A,A,B,A,B,A,A,B,B,B,A,B,B,B,A,A,-,B,B,A,B,A,A,A,B,A,A,B,A,A,A,A,B,A,A,A,A,B,A,A,A,A,B,A,B,B,A,B,B,B,A,B,B,B,B,A,-,A,B,B,B,A,B,A,A,A,A,-,A,A,B,A,A,A,A,A,B,A,B,B,A,B,A,A,B,A,A,A,B,A,B,A,B,B,B,B,A,B,A,B,B,A,A,A,B,-,A,A,A,A,B,A,B,B,A,A,A,A,A,A,A,A,B,B,B,A,B,A,B,B,B,B,B,A,A,B,-,A,A,A,A,A,-,A,B,B,B,A,B,A,A,A,B,A,B,B,B,A,-,B,A,B,B
S2_406554,,-,B,-,A,B,A,A,A,B,A,B,A,A,B,B,B,A,B,B,B,A,A,A,B,B,A,B,A,A,A,B,A,A,B,A,A,A,A,B,A,A,A,A,B,A,A,A,A,B,A,B,B,A,B,B,B,A,B,B,B,B,A,A,A,B,B,B,A,B,A,A,A,A,A,A,A,B,A,A,-,A,A,B,A,B,B,A,B,A,A,B,A,A,A,B,A,B,A,B,B,B,B,A,B,A,B,B,A,A,A,B,B,A,A,A,A,B,A,B,B,A,A,A,A,A,A,A,A,B,B,B,A,B,A,B,B,B,B,B,A,A,B,-,A,A,A,A,A,-,A,B,B,B,A,B,A,A,A,B,B,B,B,B,A,-,B,A,B,B
S2_458511,,-,B,-,A,-,A,-,A,B,A,B,-,A,B,-,B,-,-,B,B,A,A,-,B,B,A,B,-,A,A,-,-,A,B,A,A,A,-,B,-,A,A,A,-,-,A,A,A,B,A,B,B,A,B,B,B,-,B,B,B,B,A,-,A,-,B,B,A,B,A,A,-,A,-,A,A,B,A,A,-,A,A,B,A,-,B,A,-,A,A,A,A,A,A,B,A,B,A,B,A,B,B,A,B,A,A,B,-,A,A,B,-,A,A,A,-,B,A,B,B,A,A,A,A,A,A,A,A,B,-,B,A,B,A,A,-,B,B,-,A,A,B,-,A,A,A,A,A,-,A,B,-,B,A,B,A,A,A,B,A,B,B,B,A,-,B,A,B,B
S2_478072,,-,B,-,A,B,A,A,A,B,A,B,A,A,B,B,B,A,B,B,B,A,A,-,B,B,A,B,A,A,A,B,A,A,B,A,A,A,B,B,A,A,A,A,-,A,A,A,A,B,A,-,B,A,B,B,B,A,B,B,B,B,A,-,A,B,B,B,A,B,A,A,A,A,-,A,A,B,A,A,-,A,A,B,A,B,B,A,B,A,A,B,A,A,A,B,A,B,A,B,A,B,B,A,B,A,A,B,A,A,A,B,-,A,A,A,A,B,A,B,B,A,A,A,A,A,A,A,A,B,B,B,A,B,A,A,B,B,B,-,A,A,B,-,A,A,A,A,A,-,A,B,B,B,A,B,A,A,A,B,A,B,B,B,A,-,B,A,B,B
S2_493045,,A,B,-,A,B,A,A,A,B,A,B,A,A,B,B,B,-,B,B,B,A,A,-,B,B,A,B,A,A,A,B,A,A,B,A,A,A,B,B,A,A,A,A,-,A,A,A,A,B,A,B,B,A,B,B,B,A,B,B,B,B,A,A,A,B,B,B,A,B,A,A,A,A,-,A,A,B,A,A,-,A,A,B,A,B,B,A,B,A,A,B,A,A,A,B,A,B,A,A,A,B,B,A,B,A,A,B,A,A,A,B,A,A,A,A,A,B,A,B,B,A,A,A,A,A,A,A,A,B,B,B,A,B,A,A,-,B,B,B,A,A,B,-,A,A,A,A,A,-,A,B,B,B,A,B,A,A,A,B,A,B,B,B,A,-,B,A,B,B
S2_506547,,-,B,-,A,B,A,A,A,B,A,B,A,A,B,B,B,-,B,B,B,A,A,-,B,B,A,B,A,A,A,B,A,A,B,A,A,A,B,B,A,A,A,A,-,A,A,A,A,B,A,B,B,A,B,B,A,A,B,B,B,B,A,A,A,B,B,B,A,B,A,A,A,A,A,A,A,B,A,A,-,A,A,B,A,B,B,A,B,A,A,B,A,A,A,B,A,B,A,A,A,B,B,A,B,A,A,B,A,A,A,B,-,A,A,A,A,B,A,B,B,A,A,A,A,A,A,A,A,B,B,B,A,B,A,A,B,B,B,A,A,A,B,-,A,A,A,A,A,-,A,B,B,B,A,B,A,A,A,B,A,B,B,B,A,-,B,A,B,B
S2_507895,,-,B,-,A,B,A,A,A,B,A,B,-,A,B,-,B,-,B,B,B,A,A,-,B,B,A,B,-,A,A,-,A,-,B,A,A,A,B,B,A,A,A,A,-,-,-,A,A,B,A,B,B,A,B,B,A,A,B,B,B,B,A,A,A,B,B,B,A,B,A,A,A,A,-,A,A,B,A,A,-,A,A,B,A,B,B,A,B,A,A,-,A,A,A,B,A,B,A,A,A,B,B,A,B,A,A,B,A,A,A,B,-,-,A,-,-,B,A,B,B,A,A,A,A,A,-,A,A,B,B,B,A,-,A,A,B,B,B,-,A,A,B,-,A,A,A,A,A,-,A,B,B,B,A,B,-,A,-,B,A,B,B,B,A,-,B,A,B,B
S2_518973,,-,B,-,A,B,A,A,A,B,A,B,A,A,B,B,B,A,B,B,B,A,A,-,B,B,A,B,A,A,A,B,A,A,B,A,A,A,B,B,A,A,A,A,-,A,A,A,A,B,A,B,B,A,B,B,A,A,B,B,B,B,A,A,A,B,B,B,A,B,A,A,A,A,-,A,A,B,A,A,-,A,A,B,A,B,B,A,B,A,A,B,A,A,A,B,A,B,A,A,A,B,B,A,B,A,A,B,A,A,A,B,-,A,A,A,A,B,A,B,B,A,A,A,A,A,A,A,A,B,B,B,A,B,A,A,B,B,B,B,A,A,B,-,A,A,A,A,A,-,A,B,B,B,A,B,A,A,A,B,A,B,B,B,A,-,B,A,B,B
S2_595551,,-,B,-,A,B,A,-,A,B,A,B,A,A,B,A,B,-,B,B,B,A,B,-,B,B,A,B,A,A,A,B,A,A,B,A,A,A,B,B,A,A,A,A,-,A,A,A,A,B,A,B,B,A,B,A,A,A,B,B,B,B,A,A,A,A,B,B,A,B,A,A,A,A,-,A,A,B,A,A,A,A,A,B,A,B,B,A,B,A,A,B,A,A,A,B,A,B,A,A,A,B,B,A,B,A,A,B,A,A,A,B,A,B,A,A,A,B,A,B,B,A,A,A,A,A,A,A,A,A,B,B,A,B,A,A,B,B,B,B,A,A,B,-,A,A,B,B,A,-,A,B,B,B,A,B,A,A,A,B,A,B,B,B,A,A,B,A,B,-
S2_602486,,-,B,-,A,B,A,A,A,B,A,B,A,A,B,A,B,-,B,B,B,A,B,-,B,B,A,B,A,A,A,B,A,A,B,A,A,A,-,B,A,A,A,A,-,A,A,A,A,B,A,B,B,A,B,A,A,A,B,B,B,B,A,-,A,A,B,B,A,B,A,A,A,A,-,A,A,B,A,A,-,A,A,B,A,B,B,A,B,A,A,B,A,A,A,B,A,B,A,A,A,B,B,A,B,A,A,B,A,A,A,B,-,B,A,A,A,B,A,B,B,A,A,A,A,A,A,A,A,-,B,B,A,B,A,A,-,B,B,B,A,A,B,-,A,A,B,B,A,-,A,B,B,B,A,B,A,A,A,B,A,B,B,B,A,-,B,A,B,B
S2_622714,,-,B,-,A,B,A,A,A,B,A,B,A,A,B,-,B,-,B,B,B,A,B,-,B,B,A,B,A,A,A,B,A,A,B,A,A,A,B,B,A,A,A,A,-,A,A,A,A,B,A,B,B,A,B,A,A,A,B,B,B,B,A,A,A,A,B,B,A,B,A,A,A,A,A,A,A,B,A,A,-,A,A,B,A,B,B,A,B,A,A,B,A,A,A,B,A,B,A,A,A,B,B,A,B,A,A,B,A,A,A,B,A,B,A,A,A,B,A,B,B,A,A,A,A,A,A,A,A,A,B,B,A,B,A,A,-,B,B,B,A,A,B,-,A,A,B,B,A,-,A,B,B,B,A,B,A,A,A,B,A,B,B,B,A,-,B,A,B,B
S2_643550,,-,B,-,A,B,A,A,A,B,A,B,A,A,B,A,B,A,B,B,B,A,B,-,B,B,A,B,A,A,A,B,A,A,B,A,A,A,B,B,A,A,A,A,-,A,A,A,A,B,A,B,B,A,B,A,A,A,B,B,B,B,A,A,A,A,B,B,A,B,A,A,A,A,A,A,A,B,A,A,A,A,A,B,A,B,B,A,B,A,A,B,A,A,A,B,A,B,A,A,A,B,B,A,B,A,A,B,A,A,A,B,-,B,A,A,A,B,A,B,B,A,A,A,A,A,A,A,A,A,B,B,A,B,A,A,B,B,B,-,A,A,B,-,A,A,B,B,A,-,A,B,B,B,A,B,A,A,A,B,A,B,B,B,A,-,B,A,B,B
S2_667560,,-,B,-,A,B,A,A,A,B,A,B,A,A,B,A,B,-,B,B,B,A,B,B,B,B,A,B,A,A,A,B,A,A,B,A,A,A,B,A,A,A,A,A,-,A,A,A,A,B,A,B,B,A,B,A,A,A,B,B,B,B,A,-,A,A,B,B,A,B,A,A,A,A,A,A,A,B,A,A,-,A,A,B,A,B,B,A,B,A,A,B,A,A,A,B,A,B,A,A,A,B,B,A,B,A,A,B,A,A,A,B,-,B,A,A,A,B,A,B,B,A,A,A,A,A,A,A,A,A,B,B,A,B,A,A,B,B,B,B,A,A,B,-,A,A,B,B,A,-,A,B,B,B,A,B,A,A,A,B,A,B,B,B,A,-,B,A,B,B
S2_692504,,-,B,B,A,B,A,A,A,B,A,B,A,A,B,A,B,-,B,B,B,B,A,B,B,B,A,B,A,A,A,B,A,A,B,A,A,A,B,A,A,A,A,A,-,A,A,A,A,B,A,B,B,A,B,A,A,A,B,B,A,B,A,B,A,A,B,B,A,B,A,A,A,A,A,A,A,B,A,A,A,A,A,B,A,B,B,A,B,A,A,B,A,A,A,B,A,B,A,A,A,B,B,A,B,A,A,B,A,A,A,A,-,B,A,A,A,B,A,B,B,A,A,A,A,A,A,A,A,A,B,A,A,B,A,A,B,B,B,B,A,A,B,-,A,A,B,B,A,-,A,B,B,B,A,B,A,A,A,B,A,B,B,B,A,-,A,A,B,B
S2_710317,,-,B,-,A,B,A,A,A,B,A,B,A,A,B,A,B,-,B,B,B,B,A,B,B,B,A,B,A,A,A,B,A,A,B,A,A,A,B,A,A,A,A,A,-,A,A,A,A,B,A,B,B,A,B,A,A,A,B,B,A,B,A,B,A,A,B,B,A,B,A,A,A,A,A,A,A,B,A,A,-,A,A,B,A,B,B,A,B,A,A,B,A,A,A,B,A,B,A,A,A,B,B,A,B,A,A,B,A,A,A,A,-,B,A,A,A,B,A,B,B,A,A,A,A,A,A,A,A,B,B,A,A,B,A,A,B,B,B,B,A,A,B,-,A,A,B,B,A,-,A,B,B,B,A,B,A,A,A,B,A,B,B,B,A,-,A,A,B,B
S2_770145,,-,A,-,B,B,A,A,A,B,A,B,-,A,B,A,B,A,B,B,B,B,A,-,B,B,A,B,A,A,A,B,A,-,B,A,A,A,B,A,A,B,A,A,B,A,A,A,A,B,A,B,B,A,B,A,A,A,B,B,A,B,A,-,A,A,B,B,A,B,A,A,A,A,A,A,A,B,A,A,-,A,A,B,B,B,B,A,B,A,A,B,A,A,A,B,A,B,A,A,A,B,B,A,B,A,A,B,A,A,A,A,-,B,A,A,A,B,A,B,B,A,A,A,A,B,A,A,B,B,A,A,A,B,A,A,B,B,B,B,A,A,B,-,A,A,B,B,A,-,A,B,A,B,A,B,A,A,A,B,A,B,B,B,A,-,A,A,B,B
S2_816738,,-,A,-,B,B,A,A,A,B,A,B,A,A,B,A,B,A,B,B,B,B,A,-,A,B,A,B,A,A,A,B,A,A,B,A,A,A,B,A,A,B,A,A,B,A,A,-,A,B,A,B,B,A,B,A,A,A,B,B,A,B,A,-,A,A,B,B,A,B,A,A,A,A,-,A,A,B,A,A,-,A,A,B,B,B,B,A,B,A,A,B,A,A,A,B,-,B,A,A,A,B,B,A,B,A,A,B,A,A,A,A,-,B,A,A,A,B,A,B,B,A,A,A,A,B,A,A,B,B,A,A,A,B,A,A,B,B,B,-,A,A,B,-,A,A,B,B,A,-,A,B,A,B,A,B,A,A,A,B,A,B,B,B,A,-,A,A,B,B
S2_818764,,-,A,-,B,B,A,A,A,B,A,B,-,A,B,A,B,-,B,B,B,B,A,B,A,B,A,B,-,A,A,B,A,A,B,A,A,A,-,A,A,B,A,A,B,-,A,B,A,B,A,B,B,A,B,A,A,A,B,B,A,B,A,-,A,A,B,B,A,B,A,A,A,A,-,A,A,B,A,A,-,A,A,B,B,B,B,A,B,A,A,B,A,A,A,B,A,B,A,A,A,B,B,A,B,A,-,B,A,A,A,A,A,B,A,A,B,B,A,B,-,A,A,A,A,B,A,A,B,B,A,A,A,B,A,A,B,B,B,-,A,A,B,-,A,A,B,B,A,-,A,B,-,B,A,B,A,A,A,B,A,B,B,B,A,-,A,A,B,B
S2_826385,,-,A,-,B,B,A,A,A,B,A,B,A,A,B,A,B,A,B,B,B,B,A,B,A,B,A,B,A,A,A,B,A,A,B,A,A,A,B,A,A,B,A,A,B,A,A,-,A,B,A,B,B,A,B,A,A,A,B,B,A,B,A,-,A,A,B,B,A,B,A,A,A,A,A,A,A,B,A,A,A,A,A,B,B,B,B,A,B,A,A,B,A,A,A,B,A,B,A,A,A,B,B,A,B,A,A,B,A,A,A,A,-,B,A,A,B,B,A,B,B,A,A,A,A,B,A,A,B,B,A,A,A,B,A,A,B,B,B,B,A,A,B,-,A,A,B,B,A,-,A,B,A,B,A,B,A,A,A,B,A,B,B,B,A,-,A,A,B,B
S2_834133,,-,A,-,B,B,A,A,A,B,A,B,A,A,B,A,B,A,B,B,B,B,A,B,A,B,A,B,A,A,A,B,A,A,B,A,A,A,B,A,A,B,A,A,B,B,A,-,A,B,A,B,B,A,B,A,A,A,B,B,A,B,A,-,A,A,B,B,A,B,A,A,A,A,-,A,A,B,A,A,A,A,A,B,B,B,B,A,B,A,A,B,A,A,A,B,A,B,A,A,A,B,B,A,B,A,A,B,A,A,A,A,-,B,A,A,B,A,A,B,B,A,A,A,A,B,A,A,B,B,A,A,A,B,A,A,B,B,B,B,A,A,B,-,A,A,B,B,A,-,A,B,A,B,A,B,A,A,A,B,A,B,B,B,A,-,A,A,B,B
S2_868616,,-,A,-,B,B,A,A,A,B,A,B,A,A,B,A,B,A,B,B,B,B,A,B,A,B,A,B,A,A,A,B,A,A,B,A,A,A,B,A,A,B,A,A,B,B,A,B,A,B,A,B,B,A,B,A,A,A,B,B,A,B,A,-,A,A,B,B,B,B,A,A,A,A,A,A,A,B,A,A,-,A,A,B,B,B,B,B,B,A,A,B,A,A,A,B,A,B,A,A,A,B,B,A,B,A,A,B,A,A,A,A,B,B,A,A,B,A,B,B,B,A,A,A,A,B,A,A,B,B,A,A,A,B,A,A,B,B,B,B,A,A,B,-,A,A,B,B,A,-,B,B,A,B,A,B,A,A,A,B,A,B,B,B,A,A,A,A,B,B
S2_871070,,-,A,-,B,B,A,A,A,B,A,A,A,A,B,A,B,A,B,B,B,B,A,-,A,B,A,B,A,A,A,B,A,A,B,A,A,A,B,A,A,B,A,A,B,B,A,-,A,B,A,B,B,A,B,A,A,A,B,B,A,A,A,B,A,A,B,B,B,B,A,A,A,A,A,A,A,A,A,A,-,A,A,B,B,B,B,B,B,A,A,B,A,A,A,B,A,B,A,A,A,B,B,A,B,A,A,B,A,A,A,A,-,B,A,A,B,A,B,B,B,A,A,A,A,B,A,A,B,B,A,A,A,B,A,A,B,B,B,B,A,A,B,-,A,A,B,B,A,-,B,B,A,B,A,B,A,A,A,B,A,B,B,B,A,-,A,A,B,B
S2_880234,,-,A,-,B,B,A,A,A,B,A,B,A,A,B,A,B,A,B,B,B,B,A,B,A,B,A,B,A,A,A,B,A,A,B,A,A,A,B,A,A,B,A,A,B,B,A,-,A,B,A,B,B,A,B,A,A,A,B,B,A,A,A,B,A,A,B,B,B,B,A,A,A,A,A,A,A,A,A,A,-,A,A,B,B,B,B,B,B,A,A,B,A,A,A,B,A,B,A,A,A,B,B,A,B,A,A,B,A,A,A,A,-,B,A,A,B,A,B,B,B,A,A,A,A,B,A,A,B,B,A,A,A,B,A,A,B,B,B,B,A,A,B,-,A,A,B,B,A,B,B,B,A,B,A,B,A,A,A,B,A,B,B,B,A,-,A,A,B,B
S2_884342,,B,A,-,B,B,A,A,A,B,A,B,A,A,B,A,B,A,B,B,B,B,A,B,A,B,A,B,A,A,A,B,A,A,B,A,A,A,B,A,A,B,A,A,B,B,A,-,A,B,A,B,B,A,B,A,A,A,B,B,A,A,A,B,A,A,B,B,B,B,A,A,A,A,A,A,A,A,A,A,-,A,A,B,B,B,B,B,B,A,A,B,A,A,A,B,A,B,A,A,A,B,B,A,B,A,A,B,A,A,A,A,B,B,A,A,B,A,B,B,B,A,A,A,A,B,A,A,B,B,A,A,A,B,A,A,B,B,B,B,A,A,B,-,A,A,B,B,A,-,B,B,A,B,A,B,A,A,A,B,A,B,B,B,A,-,A,A,B,B
S2_885773,,-,A,-,B,B,A,A,A,B,A,B,A,A,B,A,B,A,B,B,B,B,A,B,A,B,A,B,A,A,A,B,A,A,B,A,A,A,B,A,A,B,A,A,B,B,A,-,A,B,A,B,B,A,B,A,A,A,B,B,A,A,A,B,A,A,B,B,B,B,A,A,A,A,A,A,A,A,A,A,-,A,A,B,B,B,B,B,B,A,A,B,A,A,A,B,A,B,A,A,A,B,B,A,B,A,A,B,A,A,A,A,B,B,A,A,B,A,B,B,B,A,A,A,A,B,A,A,B,B,A,A,A,B,A,A,-,B,B,B,A,A,B,-,A,A,B,B,A,-,B,B,A,B,A,B,A,A,A,B,A,B,B,B,A,-,A,A,B,B
S2_899928,,B,A,B,B,B,A,A,A,B,A,B,A,A,B,A,B,A,B,B,B,B,A,B,A,B,A,B,A,A,A,B,A,A,B,A,A,A,B,A,A,B,A,A,B,B,A,-,A,B,A,B,B,A,B,A,A,A,B,B,A,A,A,B,A,A,B,B,B,B,A,A,A,A,A,A,A,A,A,A,-,A,A,B,B,B,B,B,B,A,A,B,A,A,A,B,A,B,A,A,A,B,B,A,B,A,A,B,A,A,A,A,B,B,A,A,B,A,B,B,B,A,A,A,A,B,A,A,B,B,A,A,A,B,A,A,B,B,B,B,A,A,B,-,A,A,B,B,A,-,B,B,A,B,A,B,A,A,A,B,A,B,B,B,A,-,A,A,B,B
S2_915361,,-,A,-,B,B,A,A,A,-,A,B,A,A,B,A,B,A,B,B,B,B,A,-,A,B,A,B,A,A,A,B,-,A,B,A,A,A,B,A,A,B,A,A,B,B,A,B,A,B,A,B,B,A,B,A,A,A,B,B,A,-,A,-,A,A,B,B,B,B,A,A,A,A,-,A,A,A,A,A,-,A,A,B,B,B,B,B,B,A,A,B,A,A,A,B,A,B,A,A,A,B,-,A,B,A,A,B,A,A,A,A,-,B,A,A,B,A,B,B,B,A,A,A,A,B,A,A,B,B,A,A,A,B,A,A,B,-,B,B,A,A,B,-,A,A,B,B,A,B,B,B,A,B,A,B,A,A,A,B,A,B,B,B,A,-,A,A,B,-
S2_918731,,-,A,-,B,B,A,A,A,B,A,B,A,A,B,A,B,A,B,B,B,B,A,B,A,B,A,B,A,A,A,B,A,A,B,A,A,A,B,A,A,B,A,A,B,B,A,-,A,B,A,B,B,A,B,A,A,A,B,B,A,A,A,B,A,A,B,B,B,B,A,A,A,A,A,A,A,A,A,A,-,A,A,B,B,B,B,B,B,A,A,B,A,A,A,B,A,B,A,A,A,B,B,A,B,A,A,B,A,A,A,A,-,B,A,A,B,A,B,B,B,A,A,A,A,B,A,A,B,B,A,A,A,B,A,A,B,B,B,B,A,A,B,-,A,A,B,B,A,-,B,B,A,B,A,B,A,A,A,B,A,B,B,B,A,A,A,A,B,B
S2_940768,,-,A,-,B,B,A,-,A,B,A,B,A,A,B,A,B,A,B,B,B,B,A,-,A,B,A,B,A,A,A,B,A,A,B,A,A,A,B,A,A,B,A,A,B,B,A,-,A,B,A,B,B,A,B,A,A,A,B,B,A,A,A,B,A,A,B,B,B,B,A,A,A,A,-,A,A,A,A,A,-,A,A,B,B,B,B,B,B,A,A,B,A,A,A,B,A,B,A,A,A,B,B,A,B,A,A,B,A,A,A,A,B,B,A,A,B,A,B,B,B,A,A,A,A,B,A,A,B,B,A,A,A,B,A,A,B,B,B,-,B,A,B,-,A,A,B,B,A,-,A,B,A,B,A,B,A,A,A,B,A,B,B,B,A,-,A,A,B,B
S2_942541,,-,A,-,B,B,A,A,A,B,A,B,A,A,B,A,B,A,B,B,B,B,A,-,A,B,A,B,A,A,A,B,A,A,B,A,A,A,B,A,A,B,A,A,B,B,A,-,A,B,A,B,B,A,B,A,A,A,B,B,A,A,A,B,A,A,B,B,B,B,A,A,A,A,A,A,B,A,A,A,-,A,A,B,B,B,B,B,B,A,A,B,A,A,A,B,A,B,A,A,A,B,B,A,B,A,A,B,A,A,A,A,-,B,A,A,B,A,B,B,B,A,A,A,A,B,A,A,B,B,A,A,A,B,A,A,B,B,B,B,B,A,B,-,A,A,B,B,A,-,B,B,A,B,A,B,A,A,A,B,A,B,B,B,A,-,A,A,B,B
S2_983305,,-,A,-,B,B,A,A,A,B,A,B,A,A,B,A,B,A,B,B,B,B,A,-,A,B,A,B,B,A,A,B,A,A,B,A,A,A,B,A,A,B,A,A,B,B,A,-,A,B,A,B,B,A,B,A,A,A,B,B,A,A,A,-,A,A,B,B,B,B,A,A,A,A,-,B,B,A,A,A,-,A,A,B,B,B,B,B,B,A,A,B,A,A,A,B,A,B,A,A,A,B,B,A,B,A,A,B,A,A,A,A,B,B,A,A,B,A,B,B,B,A,A,A,A,B,A,A,B,B,A,A,A,B,A,A,B,B,B,B,B,A,B,-,A,A,B,B,A,-,B,B,A,B,A,B,A,A,A,B,A,B,B,B,A,A,A,A,B,B
S2_1007584,,-,A,-,B,-,A,-,A,B,A,B,A,A,B,A,B,A,B,B,B,B,A,-,A,B,A,B,B,A,A,B,A,A,B,A,A,A,B,A,A,B,A,A,B,-,-,B,A,B,A,B,B,A,B,A,A,A,B,B,A,A,A,B,A,A,B,B,B,B,A,A,A,A,-,B,B,A,A,A,-,B,A,B,B,B,B,B,-,A,B,B,A,A,A,B,A,B,A,A,A,B,B,A,B,A,A,B,A,A,A,A,-,B,A,A,B,A,B,B,B,A,A,A,A,B,A,A,B,B,A,A,A,B,-,A,B,B,B,-,B,A,B,-,B,A,B,B,A,-,B,B,A,B,A,B,A,A,A,B,A,B,B,B,A,-,B,A,B,B
S4_40640,,-,B,-,A,A,A,A,A,B,A,B,B,B,A,A,B,B,A,A,-,B,A,-,B,A,A,A,B,A,B,B,B,-,B,B,B,B,A,A,A,A,B,B,B,A,B,A,A,B,B,B,A,-,B,B,A,B,A,A,B,B,B,B,B,A,A,A,A,B,B,A,B,B,B,A,B,-,A,A,-,B,A,A,B,B,A,B,B,A,A,A,B,B,A,A,A,A,A,B,B,B,B,B,A,A,A,B,A,A,A,B,-,A,A,B,B,A,B,B,A,A,B,B,A,B,A,B,A,B,A,B,A,B,A,A,B,B,B,A,A,A,A,-,B,B,B,B,B,-,B,B,B,A,A,A,A,B,B,A,A,A,A,B,B,B,B,A,B,A
S4_41772,,-,B,-,A,A,A,A,A,B,A,B,B,B,A,A,B,B,A,A,-,B,A,-,B,A,A,A,-,A,B,B,B,-,B,B,B,B,A,A,A,A,B,B,B,A,B,A,A,B,B,B,A,-,B,B,A,B,A,A,B,B,B,-,B,A,A,A,A,B,B,A,B,B,-,-,B,-,A,A,B,B,A,A,B,B,A,B,B,A,A,A,B,B,A,A,A,A,A,B,B,B,B,B,A,A,A,B,A,A,A,B,-,A,A,B,B,A,B,B,A,A,B,B,A,B,A,B,A,-,A,B,A,B,A,A,B,B,B,-,A,A,A,-,B,B,B,B,B,-,B,B,B,A,A,A,A,B,B,A,A,A,A,B,B,-,B,A,B,A
S4_52821,,-,B,-,A,-,A,-,A,B,A,B,-,B,A,A,B,B,A,A,B,B,A,-,B,A,A,A,-,A,B,B,B,A,B,B,-,B,-,A,A,A,B,B,B,-,B,A,A,B,B,B,A,-,B,B,A,B,A,A,B,-,B,-,B,A,A,A,A,B,B,A,B,B,-,A,B,-,A,A,-,-,A,A,B,B,-,B,B,A,A,-,B,B,A,A,A,A,A,B,-,B,B,B,A,A,A,B,A,A,A,B,-,A,A,B,B,A,B,B,-,A,B,B,A,B,A,B,A,B,A,B,A,B,A,A,-,B,-,-,-,A,A,-,B,B,B,B,B,-,B,B,-,A,A,A,A,B,-,-,A,A,A,B,B,-,B,-,B,A
S4_65713,,-,B,-,A,A,A,A,A,B,A,B,B,B,A,A,B,B,A,A,-,B,A,-,B,A,A,A,B,A,B,B,B,-,B,B,B,B,A,A,A,A,B,B,B,A,B,A,A,B,B,B,A,-,B,B,A,B,A,A,B,B,B,-,B,A,A,A,A,B,B,A,B,B,B,A,B,-,A,A,-,B,A,A,B,B,A,B,B,A,A,A,B,B,A,A,A,A,A,B,B,B,B,B,A,A,A,B,A,A,A,B,-,A,A,B,B,A,B,B,A,A,B,B,A,B,A,B,A,B,A,B,A,B,A,A,B,B,B,-,A,A,A,-,B,B,B,B,B,-,B,B,B,A,A,A,A,B,B,A,A,A,A,B,B,-,B,A,B,A
S4_96123,,A,B,-,A,A,A,A,A,B,A,B,B,B,A,A,B,B,A,A,-,B,A,-,B,A,A,A,B,A,B,B,B,A,B,B,B,B,A,A,A,A,B,B,B,A,B,A,A,B,B,B,A,-,B,B,A,B,A,A,B,B,B,B,B,A,A,A,A,B,B,A,B,B,-,A,B,-,A,A,-,B,A,A,B,B,A,B,B,A,A,A,B,B,A,A,A,A,A,B,B,B,B,B,A,A,A,B,A,A,A,B,B,A,A,B,B,A,B,B,A,A,B,B,A,B,A,B,A,B,A,B,A,B,A,A,B,B,B,A,A,A,A,-,B,B,B,B,B,-,B,B,B,A,A,A,A,B,B,A,A,A,A,B,B,-,B,A,B,A
S4_169798,,-,B,-,A,A,A,A,A,B,A,B,B,B,A,A,B,B,A,A,-,B,A,A,B,A,A,A,B,A,B,B,B,-,B,B,B,B,A,A,A,A,B,B,B,A,B,A,A,B,B,B,A,-,B,B,A,B,A,A,B,B,B,B,B,A,A,A,A,B,B,A,B,B,B,A,B,-,A,A,-,B,A,A,B,A,A,B,A,A,A,A,B,B,A,A,A,A,A,B,B,B,B,B,A,A,A,B,A,A,A,B,B,A,A,B,B,A,B,B,A,A,B,B,A,B,A,B,A,B,A,B,A,B,A,A,B,B,B,-,A,A,A,-,B,B,B,B,B,-,B,B,B,A,A,A,A,B,B,A,A,A,A,B,B,-,B,A,B,A
S4_173394,,-,B,-,A,A,A,A,A,B,A,B,B,B,A,A,B,B,A,A,-,B,A,-,B,A,A,A,-,A,B,B,B,B,B,B,B,B,A,A,A,A,B,B,B,A,B,-,A,B,B,B,A,-,B,B,A,B,A,A,B,B,B,B,B,A,A,A,A,B,B,A,B,B,B,A,B,-,A,A,B,B,A,A,B,A,A,B,A,A,A,A,B,B,A,A,A,A,A,B,B,B,B,B,A,A,A,B,A,A,A,B,B,A,A,B,B,A,B,B,A,A,B,B,A,B,A,B,A,B,A,B,A,B,A,A,B,B,B,-,A,A,A,-,B,B,B,B,B,-,B,B,B,A,A,A,A,B,B,A,A,A,A,B,B,-,B,A,B,A
S4_214421,,-,B,-,A,A,A,A,A,B,A,B,B,B,A,A,B,B,A,A,-,B,A,A,B,A,A,A,B,A,B,B,B,-,B,B,B,B,A,A,A,A,B,B,B,A,B,-,A,B,B,B,A,-,B,B,A,B,A,A,B,B,B,B,B,A,A,A,A,B,B,A,B,B,-,A,B,-,A,A,B,B,A,A,B,A,A,B,A,A,A,A,B,B,A,A,A,A,A,A,B,B,B,B,A,A,A,B,A,A,A,B,B,A,A,B,B,A,B,B,A,A,B,B,A,B,A,B,B,B,A,B,A,B,A,A,B,B,B,-,A,A,A,-,B,B,B,B,B,-,B,B,B,A,A,A,A,B,B,A,A,A,A,B,B,-,B,A,B,A
S4_294281,,-,B,-,A,A,A,A,A,B,A,B,B,B,A,A,B,B,A,A,-,B,A,-,B,A,A,A,B,A,B,B,B,A,B,B,B,B,A,A,A,A,B,B,B,A,B,A,A,B,B,B,A,-,B,B,A,B,A,A,B,B,B,-,B,A,A,A,A,B,B,B,B,B,-,A,B,A,A,A,-,B,A,A,B,A,A,B,A,A,A,A,B,B,A,A,A,A,A,A,B,B,B,B,A,A,A,B,A,A,A,B,-,A,A,-,B,A,B,B,A,A,B,B,A,B,A,B,B,B,A,B,A,B,A,A,B,B,B,-,A,A,A,-,B,-,B,B,B,-,B,B,B,A,A,A,A,B,B,A,A,A,A,B,B,-,B,A,B,A
S4_313241,,-,B,-,A,A,A,A,A,B,A,B,B,B,A,A,B,B,A,A,-,B,A,A,B,A,A,A,B,A,B,B,B,-,B,B,B,B,A,A,A,A,B,B,B,A,B,A,A,B,B,B,A,-,B,B,A,B,A,A,B,B,B,A,B,A,A,A,A,B,B,B,B,B,B,A,B,A,A,B,-,B,A,A,B,A,A,B,A,A,A,A,B,B,A,A,A,A,A,A,B,B,B,B,A,A,A,B,A,A,B,B,-,A,A,B,B,A,B,B,A,A,B,B,A,B,A,B,B,B,A,B,A,B,A,A,B,B,B,A,A,A,A,-,B,B,B,B,B,-,B,B,B,A,A,A,A,B,B,A,A,A,A,B,B,-,B,A,B,A
S4_368508,,-,B,-,A,A,A,A,A,-,-,B,B,B,A,A,B,B,A,A,-,B,A,-,B,A,A,A,-,A,-,-,B,-,B,B,B,B,A,A,A,A,B,B,-,-,B,-,A,B,-,B,A,A,B,B,A,B,A,A,B,B,B,-,B,A,A,A,A,B,B,B,B,B,-,A,B,A,A,B,-,B,-,A,B,A,A,B,A,A,A,A,B,B,A,A,A,A,A,-,-,-,B,B,A,A,A,B,A,A,B,B,-,A,A,B,B,-,B,B,-,A,B,B,A,B,A,B,-,B,B,B,A,B,A,-,-,B,B,-,-,A,A,-,A,B,B,B,B,-,B,B,B,A,A,A,A,B,B,A,A,A,A,B,B,B,B,A,B,-
S4_377790,,-,B,-,A,A,A,A,A,B,A,B,-,B,A,A,B,B,A,A,-,B,A,-,B,A,A,A,B,A,B,B,B,-,B,B,B,B,-,A,A,A,B,B,B,-,B,A,A,B,B,B,A,A,-,B,-,B,A,A,B,-,B,-,B,A,A,A,A,B,B,B,B,-,-,A,B,A,A,B,-,B,A,A,-,A,A,-,A,A,A,A,B,B,A,A,A,A,A,A,-,B,B,B,A,A,A,B,A,A,B,B,-,A,A,B,-,A,B,-,-,A,B,B,A,B,A,B,B,B,B,B,A,B,A,A,-,B,B,-,A,A,A,-,A,B,B,B,B,-,B,B,B,A,A,A,A,B,B,A,A,A,A,B,B,-,B,A,B,A
S4_424950,,-,B,-,A,A,A,A,A,B,A,B,B,B,A,A,B,B,A,A,-,B,A,-,B,A,A,A,B,A,B,B,B,-,B,B,B,B,A,A,A,A,B,B,B,A,B,A,A,B,B,B,A,A,B,B,-,B,A,A,B,B,B,A,B,A,A,A,A,B,B,B,B,B,B,A,B,A,A,B,B,B,A,A,B,A,A,B,A,A,A,A,B,B,A,A,A,A,A,-,B,B,B,B,A,A,A,B,A,A,B,B,-,A,A,B,B,A,B,B,B,A,B,B,A,B,A,B,B,B,B,B,A,B,A,A,B,B,B,A,A,A,A,-,A,B,B,B,B,-,B,B,B,A,A,A,A,B,B,A,A,A,A,B,B,-,B,A,B,A
S4_520770,,-,B,-,A,A,A,A,A,B,B,B,B,B,A,A,B,B,B,A,-,B,A,-,B,A,A,A,B,B,B,B,B,-,B,B,B,B,A,A,A,A,B,B,B,A,B,A,A,B,B,B,A,A,B,B,-,B,A,A,B,B,B,-,B,A,A,A,A,B,A,B,B,B,B,A,B,A,A,B,-,B,A,A,B,A,A,A,A,A,A,A,B,A,A,A,A,A,A,-,B,B,B,B,A,A,A,B,A,A,B,B,B,A,A,B,B,A,B,B,B,A,B,B,A,B,A,B,B,B,B,B,A,B,A,A,B,B,B,A,A,A,A,-,A,B,B,B,B,-,B,B,B,A,A,A,A,B,B,A,A,A,A,B,B,-,B,A,B,A
S4_551387,,-,B,-,A,A,A,A,A,B,B,B,B,B,A,A,B,B,B,A,-,B,A,A,B,A,A,A,B,B,B,B,B,-,B,B,B,B,A,A,A,A,B,B,B,A,B,A,A,B,B,B,A,A,B,B,-,B,A,A,B,B,B,A,B,A,A,A,A,B,A,B,B,B,B,A,B,A,A,B,-,B,A,A,B,A,A,A,A,A,A,A,B,A,A,A,A,A,A,-,B,B,B,B,A,A,A,B,A,A,B,B,-,A,A,B,B,A,B,B,B,A,B,B,A,B,A,B,B,B,B,B,A,B,A,A,B,B,B,A,A,A,A,-,A,B,B,B,B,-,B,B,B,A,A,A,A,B,B,A,A,A,A,B,B,-,B,A,B,A
S4_604262,,-,B,-,-,A,A,A,A,-,B,B,-,B,A,A,B,B,B,A,-,-,A,-,B,A,A,A,B,B,B,B,B,-,B,B,B,B,A,A,A,A,B,B,B,A,B,A,A,B,B,B,A,A,B,B,B,B,A,A,B,B,B,-,B,A,A,-,A,B,A,B,B,B,-,A,B,A,A,B,B,B,A,A,B,A,A,A,A,-,A,A,B,A,A,A,A,-,-,-,B,B,B,B,A,A,-,B,A,A,B,B,-,A,A,B,B,A,B,B,B,A,B,B,A,B,A,B,B,-,B,B,A,B,A,A,-,B,B,-,A,A,A,-,A,B,B,B,B,-,B,B,-,A,A,A,A,B,B,A,A,A,A,B,B,-,B,A,B,-
S4_609744,,-,B,-,A,A,A,A,A,B,B,B,B,-,A,A,B,-,B,A,-,B,A,A,B,A,-,A,B,B,B,B,B,-,B,B,B,B,A,A,A,A,B,B,B,A,B,A,A,B,B,B,A,A,B,B,-,B,A,A,B,B,B,A,B,A,A,A,A,B,A,B,B,B,-,A,B,A,A,B,B,B,A,A,B,A,A,A,A,A,A,A,B,A,A,A,A,A,A,-,B,B,B,B,A,A,A,B,A,A,B,B,B,A,A,B,B,A,B,B,B,A,B,B,A,B,A,B,B,B,B,B,A,B,A,A,B,B,B,A,A,A,A,-,A,B,B,B,B,-,B,B,B,A,A,A,A,B,B,A,A,A,A,B,B,-,B,A,B,A
S4_614502,,-,B,-,A,A,A,A,A,B,B,B,B,B,A,A,B,B,B,A,-,B,A,A,B,A,A,A,B,B,B,B,B,-,B,B,B,B,A,A,A,A,B,B,B,A,B,A,A,B,B,B,A,A,B,B,-,B,A,A,B,B,B,A,B,A,A,A,A,B,A,B,B,B,B,A,B,A,A,B,B,B,A,A,B,A,A,A,A,-,A,A,B,A,A,A,A,A,A,-,B,B,B,B,A,A,A,B,A,A,B,B,-,A,A,B,B,A,B,B,B,A,B,B,A,B,A,B,B,B,B,B,A,B,A,A,B,B,B,A,A,A,A,-,A,B,B,B,B,-,B,B,B,A,A,A,A,B,B,A,A,A,A,B,B,-,B,A,B,A
S4_661589,,-,B,-,A,A,A,A,A,B,B,-,B,B,A,A,B,B,B,A,-,B,A,A,B,A,A,A,B,B,B,B,B,A,B,B,B,B,A,A,A,A,B,B,B,A,B,A,A,B,B,B,A,A,B,B,-,B,A,A,B,B,B,A,B,A,A,A,A,B,A,B,B,B,-,A,B,A,A,B,B,B,A,A,B,A,A,A,A,-,A,A,B,A,A,A,A,A,A,-,B,B,B,B,A,A,A,B,A,A,B,B,-,A,A,B,B,A,B,B,B,A,B,B,A,B,A,B,B,-,B,B,A,B,A,A,B,B,B,-,A,A,A,-,A,-,B,B,B,-,B,B,B,A,A,A,A,B,B,A,A,A,A,B,B,-,B,A,B,A
S4_665047,,-,B,-,A,A,A,-,A,B,B,B,B,B,A,A,B,B,B,A,B,B,A,A,B,A,A,A,B,B,B,B,B,B,B,B,B,B,A,A,A,A,B,B,B,A,B,A,A,B,B,B,A,A,B,B,-,B,A,A,B,B,B,-,B,A,A,A,A,B,A,B,B,B,B,A,B,A,A,B,-,B,A,A,B,A,A,-,-,-,A,-,B,A,A,A,A,A,A,-,B,B,B,B,A,A,A,B,A,-,B,B,B,A,A,B,B,A,B,B,B,A,B,B,A,B,A,B,B,B,-,B,A,B,A,A,B,B,B,-,A,A,A,-,A,B,-,B,B,-,B,B,B,A,A,A,A,B,B,A,A,A,A,B,B,B,B,-,B,A
S4_691315,,-,B,-,A,A,A,A,A,B,B,B,B,B,A,-,B,B,B,A,-,B,A,-,B,A,A,A,-,B,B,B,B,-,B,B,B,B,A,A,A,A,B,B,B,A,B,A,A,B,B,B,A,A,B,B,-,B,A,A,B,B,B,A,B,A,A,A,A,B,A,B,B,B,-,A,B,A,A,B,-,B,A,A,B,A,A,A,A,A,A,A,B,A,A,A,A,A,A,-,B,B,B,B,A,A,A,B,A,A,B,B,-,A,A,B,B,A,B,B,B,A,B,B,A,B,A,B,B,B,B,B,A,B,A,A,B,B,B,-,A,A,A,-,A,B,B,B,B,-,B,B,B,A,A,A,A,B,B,A,A,A,A,B,B,-,B,A,B,A
S4_739641,,-,B,-,A,-,A,A,A,B,B,B,B,B,A,-,B,B,B,A,-,B,A,-,B,A,A,A,-,B,B,B,-,A,B,B,B,B,A,A,A,A,B,B,B,A,B,A,A,B,B,B,A,A,B,B,-,B,A,A,B,B,B,-,B,A,A,A,A,B,A,B,B,B,-,A,B,A,A,B,-,B,A,A,B,A,A,A,A,A,A,A,B,A,A,A,A,A,A,-,B,B,B,B,A,A,A,B,A,A,B,B,B,A,A,B,B,A,B,B,B,A,B,B,A,B,A,B,B,B,B,B,A,B,A,A,B,B,B,-,B,A,A,B,A,-,B,B,B,-,B,B,B,A,A,A,A,B,B,A,A,A,A,B,B,-,B,A,B,A
S4_749029,,-,B,-,A,A,A,A,A,B,B,B,B,B,A,A,B,B,B,A,-,B,A,-,B,A,A,A,B,B,B,B,B,A,B,B,B,B,A,A,A,A,B,B,B,A,B,A,A,B,B,B,A,A,B,B,-,B,A,A,B,B,B,A,B,A,A,A,A,B,A,B,B,B,-,A,B,A,A,B,-,B,A,A,B,A,A,A,A,A,A,A,B,A,A,A,A,A,A,-,B,B,B,B,A,A,A,B,A,A,B,B,-,A,A,B,B,A,B,B,B,A,B,B,A,B,A,B,B,B,B,B,A,B,A,A,B,B,B,A,B,A,A,-,A,B,B,B,B,-,B,B,B,A,A,A,A,B,B,A,A,A,A,B,B,-,B,A,B,A
S4_854954,,-,B,-,A,A,A,-,A,-,-,B,B,B,A,A,B,B,B,A,B,B,-,-,B,A,A,A,B,B,B,-,B,A,B,B,A,B,A,A,A,A,B,B,B,A,B,A,-,B,B,B,A,A,B,A,-,A,-,A,A,B,B,-,B,A,A,A,-,B,A,B,B,B,-,A,B,A,A,B,-,B,A,A,B,A,A,A,A,A,A,-,B,B,A,A,A,A,-,-,B,B,B,B,-,-,A,B,A,A,B,B,-,A,A,-,-,-,B,B,B,A,B,B,A,B,A,B,B,B,B,B,A,B,A,A,-,B,B,-,B,A,A,-,A,B,B,B,B,-,B,B,-,A,A,A,A,B,B,A,A,-,A,B,B,-,B,A,B,-
S4_876862,,-,B,-,A,A,A,A,A,B,B,B,B,B,A,A,B,B,B,A,B,B,A,A,B,A,A,A,B,B,B,B,B,A,B,B,A,B,A,A,A,A,B,B,B,A,B,A,A,B,B,B,A,A,B,A,-,A,A,A,A,B,B,A,B,A,A,A,A,B,A,B,B,B,B,A,B,A,A,B,B,B,A,A,B,A,A,A,A,A,A,A,B,B,A,A,A,A,A,B,B,B,B,B,A,A,A,B,A,A,A,B,-,A,A,B,B,B,B,B,B,A,B,B,A,B,A,B,B,B,B,B,A,B,A,A,B,B,B,A,B,A,A,B,A,B,B,B,B,-,B,B,B,A,A,A,A,B,B,A,A,A,A,B,B,-,B,A,B,A
S4_960834,,-,B,-,A,A,A,A,A,B,B,B,B,A,A,A,B,B,B,B,B,B,A,-,B,A,A,A,-,B,-,-,B,A,B,B,A,-,A,A,A,A,B,B,B,A,B,A,-,B,B,-,A,A,B,A,-,A,A,A,A,B,B,-,B,A,-,A,A,B,A,B,-,-,-,A,B,A,A,B,-,B,A,A,B,A,-,A,A,A,A,A,B,-,A,A,A,-,A,-,B,B,B,B,A,A,A,B,A,-,A,-,-,A,A,A,-,-,B,B,A,A,B,B,A,B,A,B,A,-,B,B,A,B,A,A,-,B,B,-,B,A,A,-,A,A,B,B,-,-,B,B,B,B,A,A,A,B,A,A,A,A,A,B,B,-,B,A,B,A
S4_968396,,-,B,-,A,A,A,A,A,B,B,B,B,A,A,A,B,B,B,B,B,B,A,-,B,A,A,A,B,B,B,B,B,A,B,B,A,B,A,A,A,A,B,B,B,A,B,A,A,B,B,B,A,A,B,A,-,A,A,A,A,B,B,A,B,A,A,A,A,B,A,B,B,B,B,A,B,A,A,B,-,B,A,A,B,A,A,A,A,A,A,A,B,B,A,A,A,A,A,-,B,B,B,B,A,A,A,B,A,A,A,B,B,A,A,A,B,-,B,B,A,A,B,B,A,B,A,B,A,B,B,B,A,B,A,A,B,B,B,-,B,A,A,-,A,B,B,B,B,-,B,B,B,-,A,A,A,B,A,A,A,A,A,B,B,-,B,A,B,A
S4_974910,,A,B,-,A,A,A,A,A,B,B,B,B,A,A,A,B,B,B,B,B,B,A,A,B,A,A,A,B,B,B,B,B,A,B,B,A,B,A,A,A,A,B,B,B,A,B,A,A,B,B,B,A,A,B,A,-,A,A,A,A,B,B,A,B,A,A,A,A,B,B,B,B,B,B,A,B,A,A,B,-,B,A,A,B,A,A,A,A,A,A,A,B,B,A,A,A,A,B,-,B,B,B,B,A,A,A,B,A,A,A,B,B,A,A,A,B,-,B,B,A,A,B,B,A,B,A,B,A,B,B,B,A,B,A,A,B,B,B,A,B,A,A,-,A,B,B,B,B,-,B,B,B,-,A,A,A,B,A,A,A,A,A,B,B,-,B,A,B,A
S4_982794,,-,B,-,A,A,A,A,A,B,B,B,B,A,A,A,B,B,B,B,B,B,A,A,B,A,A,A,B,B,B,B,B,A,B,B,A,B,A,A,A,A,B,B,B,A,B,A,A,B,B,B,A,A,B,A,-,A,A,A,A,B,B,A,B,A,A,A,A,B,B,B,B,B,-,A,B,A,A,B,B,B,A,A,B,A,A,A,A,A,A,A,B,B,A,A,A,A,B,-,B,B,B,B,A,A,A,B,A,A,A,B,B,A,A,A,B,-,B,B,A,A,B,B,A,B,A,B,A,B,B,B,A,B,A,A,B,B,B,A,B,A,A,-,A,-,B,B,B,-,B,B,B,-,A,A,A,B,A,A,A,A,A,B,B,-,B,A,B,A
S4_984514,,-,B,-,A,A,A,A,A,B,B,B,B,A,A,A,B,B,B,B,B,B,A,-,B,A,A,A,B,B,B,B,B,A,B,B,A,B,A,A,A,A,B,B,B,A,B,A,A,B,B,B,A,A,B,A,-,A,A,A,A,B,B,A,B,A,A,A,A,B,B,B,B,B,B,A,B,A,A,B,-,B,A,A,B,A,A,A,A,A,A,A,B,B,A,A,A,A,B,-,B,B,B,B,A,A,A,B,A,A,A,B,B,A,A,A,B,-,B,B,A,A,B,B,A,B,A,B,A,B,B,B,A,B,A,A,B,B,B,-,B,A,A,-,A,B,B,B,B,-,B,B,B,-,A,A,A,B,A,A,A,A,A,B,B,-,B,A,B,A
S4_1000274,,-,B,B,A,A,A,A,A,B,B,B,B,A,A,A,B,B,B,B,B,B,A,A,B,A,A,A,B,B,B,B,B,A,B,B,A,B,A,A,A,A,B,B,B,A,B,A,A,B,B,B,A,A,B,A,-,A,A,A,A,B,B,A,B,A,A,A,A,B,B,B,B,B,B,A,B,A,A,B,B,B,A,A,B,A,A,A,A,A,A,A,B,B,A,A,A,A,B,-,B,B,B,B,A,A,A,B,A,A,A,B,-,A,A,A,B,B,B,B,A,A,B,B,A,B,A,B,A,B,B,B,A,B,A,A,B,B,B,A,B,A,A,-,A,B,B,B,B,-,B,B,B,-,A,A,A,B,A,A,A,A,A,B,B,-,B,A,B,A
S4_1062749,,-,B,-,A,A,A,A,A,B,B,B,B,A,A,A,B,B,A,B,B,B,A,A,B,A,A,A,B,B,B,B,B,A,B,B,A,B,A,A,A,A,B,B,B,A,B,A,A,B,B,B,A,A,B,A,-,A,A,A,A,B,B,A,B,A,A,A,A,B,B,B,B,B,B,A,B,A,A,B,-,B,A,A,B,A,A,A,A,A,A,A,B,B,A,A,A,A,B,-,B,B,B,B,A,A,A,B,A,A,A,B,B,A,A,A,B,-,B,B,A,A,B,B,A,B,A,B,A,B,B,B,A,B,A,A,B,B,B,A,B,A,A,-,A,B,B,B,B,-,B,B,B,-,B,A,A,B,A,A,A,A,A,B,B,-,B,A,B,A
S4_1066310,,-,B,-,A,A,A,A,A,B,B,B,B,A,A,A,B,B,A,B,B,B,A,-,B,A,A,A,B,B,B,B,B,A,B,B,A,B,A,A,A,A,B,B,B,A,B,A,A,B,B,B,A,A,B,A,-,A,A,A,A,B,B,A,B,A,A,A,A,B,B,B,B,B,-,A,B,A,A,B,B,B,A,A,B,A,A,A,A,A,A,A,B,B,A,A,A,A,B,-,B,B,B,B,A,A,A,B,A,A,A,B,-,A,A,A,B,B,B,B,A,A,B,B,A,B,A,B,A,B,B,B,A,B,A,A,-,B,B,A,B,A,A,-,A,B,B,B,B,B,B,B,B,-,B,A,A,B,A,A,A,A,A,B,B,-,B,A,B,A
S4_1120799,,-,B,-,A,A,A,A,A,B,B,B,B,A,A,A,B,B,A,A,B,B,B,A,B,A,A,A,B,B,B,B,B,A,B,B,A,B,A,A,A,A,B,B,B,A,B,A,A,B,B,B,A,A,B,A,-,A,A,A,A,B,B,A,B,A,A,A,A,B,B,B,B,B,B,A,B,A,A,B,B,B,A,A,B,A,A,A,A,A,A,A,B,B,A,A,A,A,B,-,B,B,B,B,A,A,A,B,A,A,A,B,B,A,A,A,B,-,B,B,A,A,B,B,A,B,A,B,A,B,B,B,A,B,A,A,B,B,B,A,A,A,A,-,A,B,B,B,B,-,B,B,B,-,B,A,A,B,A,A,A,A,A,B,B,B,B,A,B,A
S4_1122153,,-,B,-,A,A,A,A,A,B,B,B,-,A,A,A,B,B,A,A,B,B,B,-,B,A,A,A,B,B,B,-,B,-,B,B,A,B,-,A,A,A,B,B,B,-,B,A,A,B,B,B,A,A,B,A,-,A,A,A,A,B,B,-,B,A,A,A,A,B,B,B,B,B,-,A,B,A,A,B,-,B,A,A,B,A,A,A,A,A,A,-,B,B,A,A,A,A,B,-,B,B,B,B,A,A,A,B,A,A,A,B,-,A,A,A,B,B,B,B,A,A,B,B,A,B,A,B,A,-,B,B,A,B,A,A,B,B,B,-,A,A,A,-,A,B,B,B,B,-,B,B,B,-,B,A,A,B,A,A,A,A,A,B,B,-,B,A,B,A
S4_1123824,,-,B,-,-,A,A,-,A,B,B,B,B,A,-,-,B,B,A,-,B,B,B,-,B,A,A,A,B,B,B,B,-,-,-,B,A,B,A,A,-,A,B,B,B,A,B,A,A,B,-,B,A,A,B,A,-,A,A,A,A,B,B,-,B,A,-,A,A,B,B,B,B,B,-,A,B,A,A,B,-,B,A,A,B,A,A,A,-,A,A,-,B,-,A,A,A,A,B,-,B,B,B,B,A,A,A,B,A,-,A,B,-,A,A,A,-,-,B,-,-,A,B,B,A,B,A,B,A,B,B,B,A,-,A,A,B,B,B,-,A,A,A,-,-,B,B,B,B,-,B,B,-,-,B,A,A,B,A,A,A,A,A,B,B,-,B,A,B,A
S4_1190955,,-,B,-,A,A,A,A,A,B,A,B,B,A,A,A,B,B,A,A,B,B,B,A,B,B,A,A,B,B,B,B,B,A,B,B,A,B,A,A,A,A,B,B,B,A,B,B,A,B,A,B,A,A,B,A,-,A,A,A,A,B,B,A,B,A,A,A,A,B,B,B,B,B,-,A,B,A,A,B,B,B,A,A,B,A,A,A,A,A,A,B,B,B,A,A,A,A,B,-,B,B,B,B,A,A,A,B,A,A,B,B,B,A,A,A,B,-,B,B,A,A,B,B,A,B,A,B,A,B,B,B,A,B,A,A,B,B,B,A,A,A,A,-,A,B,B,B,B,B,B,B,B,B,B,A,A,B,A,A,A,A,A,B,B,-,B,A,B,A
S4_1216909,,-,B,-,A,A,A,A,A,B,A,B,B,A,A,A,B,B,A,A,B,B,B,A,B,B,A,A,B,B,B,B,B,A,B,B,A,B,A,A,A,A,B,B,B,A,B,B,A,B,A,B,A,A,B,A,-,A,A,A,A,B,B,A,B,A,A,A,A,B,B,B,B,B,-,A,B,A,A,B,-,B,A,A,B,A,A,A,A,A,A,B,B,B,A,A,A,A,B,-,B,B,B,B,A,A,A,B,A,A,B,B,-,A,A,A,B,-,B,B,A,A,B,B,A,B,A,B,A,B,B,B,A,B,A,A,-,B,B,A,A,A,A,-,A,B,B,B,B,-,B,B,B,B,B,A,A,B,A,A,A,A,A,B,B,-,B,A,B,A
S4_1220070,,-,B,-,A,A,A,A,A,B,A,B,B,A,A,A,B,B,A,A,B,B,B,-,B,B,A,A,-,B,B,B,B,A,B,B,A,B,A,A,A,A,B,B,B,A,B,B,A,B,A,B,A,A,B,A,-,A,A,A,A,B,B,A,B,A,A,A,A,B,B,B,B,B,-,A,B,A,A,B,-,B,A,A,B,A,A,A,A,A,A,B,B,B,A,A,A,A,B,-,B,B,B,B,A,A,A,B,A,A,B,B,-,A,A,A,B,-,B,B,A,A,B,B,A,B,A,B,A,B,B,B,A,B,A,A,B,B,B,-,A,A,A,-,A,A,B,B,B,-,B,B,B,B,B,A,A,B,A,A,A,A,A,B,B,-,B,A,B,A
S4_1221964,,-,B,-,A,A,A,A,A,B,A,B,-,A,A,A,B,B,A,A,B,B,B,-,B,B,A,A,B,B,B,B,B,A,B,B,A,B,A,A,A,A,B,B,B,A,B,B,A,B,A,B,A,A,B,A,-,A,A,A,A,B,B,-,B,A,A,A,A,B,B,B,B,B,-,A,B,A,A,B,B,B,A,A,B,A,A,A,A,A,A,B,B,B,A,A,A,A,B,-,B,B,B,B,A,A,A,B,A,A,B,B,-,A,A,A,B,-,B,B,A,A,B,B,A,B,A,B,A,B,B,B,A,B,A,A,B,B,B,-,A,A,A,-,A,B,B,B,B,-,B,B,-,B,B,A,A,B,A,A,A,A,A,B,B,B,B,A,B,A
S4_1223052,,-,B,-,A,A,A,A,A,B,A,B,B,A,A,A,B,B,A,A,B,B,B,A,B,B,A,A,B,B,B,B,B,A,B,B,A,B,A,A,A,A,B,B,B,A,B,B,A,B,A,B,A,A,B,A,-,A,A,A,A,B,B,A,B,A,A,A,A,B,B,B,B,B,B,A,B,A,A,B,B,B,A,A,B,A,A,A,A,A,A,B,B,B,A,A,A,A,B,-,B,B,B,B,A,A,A,B,A,A,B,B,-,A,A,A,B,-,B,B,A,A,B,B,A,B,A,B,A,B,B,B,A,B,A,A,B,B,B,-,A,A,A,-,A,B,B,B,B,-,B,B,B,B,B,A,A,B,A,A,A,A,A,B,B,B,B,A,B,A
S4_1233046,,-,B,-,A,A,A,A,A,B,A,B,B,A,A,A,B,B,A,A,B,B,B,A,B,B,A,A,B,B,B,B,B,A,B,B,A,B,A,A,A,A,B,B,B,A,B,B,A,B,A,B,A,A,B,A,-,A,A,A,A,B,B,A,B,A,A,A,A,B,B,B,B,B,-,A,B,A,A,B,-,B,A,A,B,A,A,A,A,A,A,B,B,B,A,A,A,A,B,-,B,B,B,B,A,A,A,B,A,A,B,B,-,A,A,A,B,-,B,B,A,A,B,B,A,B,A,B,A,B,B,B,A,B,A,A,B,B,B,A,A,A,A,-,A,B,B,B,B,B,B,B,B,B,B,A,A,B,A,A,A,A,A,B,B,-,B,A,B,A
S4_1235964,,A,B,-,A,A,A,A,A,B,A,B,B,A,A,A,B,B,A,A,B,B,B,-,B,B,A,A,B,B,B,B,B,A,B,B,A,B,A,A,A,A,B,B,B,A,B,B,A,B,A,B,A,A,B,A,-,A,A,A,A,B,B,-,B,A,A,A,A,B,B,B,B,B,-,A,B,A,A,B,B,B,A,A,B,A,A,A,A,A,A,B,B,B,A,A,A,A,B,-,B,B,B,B,A,A,A,B,A,A,B,B,-,A,A,A,B,-,B,B,A,A,B,B,A,B,A,B,A,B,B,B,A,B,A,A,B,B,B,A,A,A,A,-,A,B,B,B,B,-,B,B,B,B,B,A,A,B,A,A,A,A,A,B,B,B,B,A,B,A
S4_1244339,,-,B,-,A,A,A,A,A,B,A,B,B,A,A,A,B,B,A,A,B,B,B,A,B,B,A,A,B,B,B,B,B,A,B,B,A,B,A,A,A,A,B,B,B,A,B,B,A,B,A,B,A,A,B,A,-,A,A,A,A,B,B,A,B,A,A,A,A,B,B,B,B,B,B,A,B,A,A,B,-,B,A,A,B,A,A,A,A,A,A,B,B,B,A,A,A,A,B,-,B,B,B,B,A,A,A,B,A,A,B,B,-,A,A,A,B,-,B,B,A,A,B,B,A,B,A,B,A,B,B,B,A,B,A,A,B,B,B,A,A,A,A,-,A,B,B,B,B,-,B,B,B,B,B,A,A,B,A,A,A,A,A,B,B,-,B,A,B,A
S4_1251992,,-,B,-,A,A,A,A,A,B,A,B,B,A,A,A,B,B,A,A,B,B,B,-,B,B,A,A,B,B,B,B,B,A,B,B,A,B,A,A,A,A,B,B,B,-,B,B,A,B,A,B,A,A,B,A,-,A,A,A,A,B,B,A,B,A,A,A,A,B,B,A,B,B,B,A,B,A,A,B,-,B,A,A,B,A,A,A,A,A,A,B,B,B,A,A,A,A,B,-,B,B,B,B,A,A,A,B,A,A,B,B,-,A,A,A,B,-,B,B,A,A,B,B,A,B,A,B,A,B,B,B,A,B,A,A,B,B,B,-,A,A,A,-,A,B,B,B,B,-,B,B,B,B,B,A,A,B,A,A,A,A,A,B,B,-,B,A,B,A
S4_1257400,,-,B,-,A,A,A,A,A,B,A,B,B,A,A,A,B,B,A,A,B,B,B,A,B,B,A,A,B,B,B,B,B,A,B,B,A,B,A,A,A,A,B,B,B,A,B,B,A,B,A,B,A,A,B,A,-,A,A,A,A,B,B,A,B,A,A,A,A,B,B,A,B,B,B,A,B,A,A,B,-,B,A,A,B,A,A,A,A,A,A,B,B,B,A,A,A,A,B,-,B,B,B,B,A,A,A,B,A,A,B,B,B,A,A,A,B,-,B,B,A,A,B,B,A,B,A,B,A,B,B,B,A,B,A,A,B,B,B,A,A,A,A,-,A,B,B,B,B,-,B,B,B,A,B,A,A,B,A,A,A,A,A,B,B,-,B,A,B,A
S4_1259237,,-,B,-,-,-,A,A,A,B,A,B,-,A,A,A,B,B,A,A,-,B,B,A,B,B,A,A,-,B,B,-,-,-,B,B,A,B,A,A,A,A,B,B,B,A,B,B,A,B,A,B,A,A,B,A,A,A,A,A,A,B,B,A,B,A,-,A,A,B,B,A,B,B,-,A,B,A,A,B,-,B,A,A,B,A,A,A,-,A,A,B,B,B,A,A,A,A,B,-,B,-,B,B,A,A,-,-,A,A,B,B,-,A,A,A,-,B,B,B,-,A,B,B,A,B,A,B,A,B,B,B,A,B,A,A,-,B,-,-,A,A,A,-,A,B,B,B,B,-,B,B,-,A,B,A,A,-,A,-,A,A,A,B,B,-,B,A,B,A
S4_1261974,,-,B,-,A,A,A,A,A,B,-,-,B,A,A,A,B,B,A,A,B,B,B,-,B,B,A,A,-,B,-,-,-,A,B,B,-,B,A,A,A,A,B,B,B,A,B,B,A,B,A,B,A,A,B,A,-,A,A,A,A,B,B,-,B,A,-,A,A,B,B,A,B,B,B,A,B,A,A,-,-,B,A,A,-,A,A,A,A,A,A,B,B,B,A,A,A,A,B,B,B,B,B,B,-,A,A,B,A,A,B,B,-,A,A,A,-,-,B,B,A,A,B,B,A,B,A,B,A,B,B,B,A,B,A,A,B,B,B,-,A,A,A,-,A,B,B,B,B,-,B,B,B,A,B,A,A,B,-,A,A,A,A,B,B,-,B,A,B,-
S4_1459336,,-,B,-,A,-,A,A,A,B,A,B,B,A,A,A,B,B,A,A,B,B,B,A,B,B,A,A,B,B,A,B,B,A,B,B,A,B,-,A,A,A,B,A,B,A,B,B,A,B,A,B,A,A,B,A,B,A,A,A,-,B,B,A,B,A,A,A,A,B,B,B,B,B,B,A,B,B,A,B,-,B,A,A,B,A,A,A,A,B,A,B,B,B,A,A,A,A,B,A,B,B,B,B,A,A,A,B,A,B,B,B,B,A,A,A,B,B,B,B,A,A,A,B,A,B,A,B,B,B,B,B,A,B,A,A,B,B,B,A,A,B,A,-,B,B,B,B,A,-,B,B,B,A,B,A,A,B,A,A,A,A,A,B,B,-,B,A,B,A
S4_1466055,,-,B,-,A,A,A,A,-,B,A,B,-,A,A,-,B,-,A,-,B,B,B,-,B,B,A,A,-,B,A,B,B,A,B,B,A,B,-,A,A,A,B,A,B,-,B,B,A,B,A,B,A,A,B,A,B,A,A,A,B,B,B,A,B,-,-,A,A,B,B,B,-,B,-,-,B,B,A,B,-,B,-,A,B,A,A,A,A,B,A,B,B,-,A,A,A,A,B,A,-,B,B,B,A,A,A,B,A,B,-,B,-,A,A,-,B,B,B,B,-,A,A,B,A,B,A,B,B,B,B,B,A,B,A,A,-,B,B,-,A,B,A,-,B,B,B,B,A,-,B,B,B,A,B,A,A,B,-,A,A,A,A,B,B,-,B,A,B,A
S4_1476061,,-,B,-,A,A,A,A,A,B,A,B,B,A,A,A,B,B,A,A,B,B,B,A,B,B,A,A,B,B,A,B,B,A,B,B,A,B,A,A,B,A,B,A,B,A,B,B,A,B,A,B,A,A,B,A,-,A,A,A,-,B,B,A,B,A,A,A,A,B,B,B,B,B,-,A,B,B,A,B,B,B,A,A,A,A,A,A,A,B,A,B,B,B,A,A,A,A,B,A,B,B,B,B,A,A,A,B,A,B,B,B,-,A,A,A,B,B,B,B,A,A,A,B,A,B,A,B,B,B,B,B,A,B,A,A,B,B,B,-,A,-,A,-,B,B,B,B,A,-,B,B,B,A,B,A,A,B,A,A,A,A,A,B,B,B,B,A,B,A
S4_1524424,,-,B,-,A,A,A,A,A,B,A,B,B,A,A,A,B,B,A,A,B,B,B,A,B,B,A,A,B,B,A,B,B,A,B,B,A,B,A,A,B,A,B,A,B,A,B,B,A,B,A,B,A,A,B,A,-,A,A,A,-,B,B,A,B,A,A,A,A,B,B,B,B,B,B,A,B,B,A,B,-,B,A,A,-,A,A,A,A,B,A,B,B,B,A,A,A,A,B,A,B,B,B,B,A,A,A,B,A,B,B,B,-,A,A,A,B,B,B,B,A,A,A,B,A,B,A,B,B,B,B,B,A,A,A,A,B,B,B,A,A,-,A,-,B,B,B,B,A,-,B,B,B,A,B,A,A,B,A,A,A,A,A,B,B,B,B,A,B,A
S5_8508,,-,B,-,A,A,-,A,B,A,A,B,B,A,A,A,B,A,B,A,B,A,A,-,A,B,A,A,B,A,B,A,A,B,A,A,B,A,B,B,B,B,A,A,A,A,A,B,A,B,B,B,B,B,A,A,A,A,A,B,A,A,A,-,B,B,B,A,B,A,B,A,A,A,-,A,A,A,A,B,-,A,B,A,B,B,A,A,B,B,B,A,A,A,B,A,B,B,B,B,B,B,-,A,A,A,A,A,B,A,A,A,-,A,A,B,B,A,A,A,B,B,A,A,B,B,A,B,B,-,A,B,B,B,A,A,B,B,A,B,A,-,B,-,A,A,A,A,A,-,B,B,A,B,A,A,A,B,B,B,-,A,B,A,B,-,A,B,B,A
S5_17286,,-,B,-,A,-,-,A,B,A,A,B,B,A,A,-,B,-,B,A,B,A,A,-,A,B,A,A,-,A,B,A,A,-,A,A,B,A,B,B,B,B,A,A,A,A,A,B,A,B,-,B,B,B,-,A,A,A,-,B,A,A,A,-,B,B,-,A,B,A,B,A,A,A,-,A,A,A,A,B,-,A,-,A,B,-,A,A,B,B,B,-,A,A,B,A,B,B,B,B,B,-,A,A,A,A,A,A,B,A,A,-,-,A,A,B,B,A,A,A,-,B,A,A,B,B,A,B,B,A,A,B,B,-,A,A,-,-,A,-,A,B,B,-,A,A,A,A,A,-,B,B,A,B,A,A,A,B,-,B,A,A,B,A,B,-,A,B,B,A
S5_41509,,-,B,-,A,B,-,A,B,A,A,B,B,A,A,A,B,A,B,A,B,A,A,B,A,B,A,A,B,A,B,A,A,B,A,A,B,A,B,B,B,A,A,A,A,A,A,B,A,B,B,B,B,B,-,A,A,A,A,B,A,A,A,-,B,B,B,A,B,A,B,A,A,A,A,A,A,A,A,B,-,A,B,A,B,B,A,A,B,B,B,A,A,A,B,A,B,B,B,B,B,B,-,A,A,A,A,A,B,A,A,A,-,A,A,B,B,A,A,A,B,B,A,A,B,B,A,B,B,A,A,B,B,B,A,A,B,B,A,B,A,-,B,-,A,A,A,A,A,A,B,B,A,B,A,A,A,B,B,B,-,A,B,A,B,B,A,B,B,A
S5_43342,,-,B,-,A,B,-,A,B,A,A,B,B,A,A,A,B,A,B,A,B,A,A,-,A,B,A,A,B,A,B,A,A,B,A,A,B,A,B,B,B,A,A,A,A,A,A,B,A,B,B,B,B,B,-,A,A,A,A,B,A,A,A,B,B,B,B,A,B,A,B,A,A,A,-,A,A,A,A,B,-,A,B,A,B,B,-,A,B,B,B,A,A,A,B,A,B,B,B,B,B,B,-,A,A,A,A,A,B,A,A,A,-,A,A,B,B,A,A,A,B,B,A,A,B,B,A,B,B,A,A,B,B,B,A,A,B,B,A,B,A,-,B,-,A,A,A,A,A,-,B,B,A,B,A,A,A,B,B,B,-,A,B,A,B,B,A,B,B,A
S5_47706,,-,B,-,A,-,-,A,B,A,A,B,B,A,A,-,B,A,B,A,B,-,A,-,A,B,A,A,B,A,B,A,A,B,A,A,B,A,B,B,B,A,A,A,A,A,A,B,A,B,B,B,B,B,-,A,A,A,A,B,A,A,A,-,B,B,B,A,B,A,B,A,A,A,-,A,A,A,A,B,-,A,B,A,B,B,-,A,B,B,B,A,-,A,B,-,B,B,B,B,B,B,-,A,A,A,A,A,B,A,A,A,B,A,A,B,-,A,A,A,B,B,-,A,B,B,A,B,B,A,A,B,B,B,A,A,-,B,A,B,A,-,B,-,A,A,A,A,A,-,B,B,A,B,A,A,-,B,-,B,-,A,B,A,B,-,A,B,B,A
S5_106742,,-,B,-,A,B,-,A,B,A,A,B,B,A,A,A,B,A,B,A,B,A,A,B,A,B,A,A,B,A,B,A,A,B,A,A,B,A,B,B,B,A,A,A,A,A,A,B,A,B,B,B,B,B,-,A,A,A,A,B,A,A,A,B,B,B,B,A,B,A,B,A,A,A,-,A,A,A,A,B,-,A,B,A,B,B,A,A,B,B,B,A,A,A,B,A,B,B,B,B,B,B,-,A,A,A,A,A,B,A,A,A,-,A,A,B,B,A,A,A,B,B,A,A,B,B,A,B,B,A,A,B,B,B,A,A,B,B,A,-,A,-,B,-,A,A,A,A,A,-,B,B,A,B,A,A,A,B,B,B,-,A,B,A,B,-,A,B,B,A
S5_134241,,-,B,-,A,B,-,A,B,A,A,B,B,A,A,A,B,A,B,A,B,-,A,B,A,B,A,A,B,A,B,A,A,B,A,A,B,A,B,B,B,A,A,A,A,A,A,B,A,B,B,B,B,B,-,A,A,A,A,B,A,A,A,-,B,B,B,A,B,A,B,A,A,A,-,A,A,A,A,B,-,A,B,A,B,B,A,A,B,B,B,A,A,A,B,A,B,B,B,B,B,B,-,A,A,A,A,A,B,A,A,A,B,A,A,B,B,A,A,A,B,B,A,A,B,B,A,B,B,A,A,B,B,B,A,A,B,B,A,B,A,-,B,-,A,A,A,A,A,-,B,B,A,B,A,A,A,B,B,B,B,A,B,A,B,-,A,B,B,A
S5_136085,,-,B,-,A,-,A,A,B,A,A,-,-,A,A,-,B,A,B,A,-,A,A,-,A,B,A,A,B,A,-,A,A,B,A,A,B,A,-,B,B,A,A,A,A,A,A,B,A,B,B,B,B,B,A,A,A,A,A,B,A,A,A,-,B,B,B,A,B,A,B,A,A,A,-,A,A,A,A,B,-,A,-,A,B,B,A,A,B,B,B,A,A,A,B,A,-,-,B,B,-,B,A,A,A,A,A,A,B,A,A,A,-,A,A,B,-,A,A,A,-,B,A,A,B,B,A,B,B,A,A,B,-,B,A,A,-,B,A,-,A,A,B,-,A,A,A,A,A,-,B,B,A,B,A,A,A,B,-,-,B,A,B,A,B,-,A,B,B,A
S5_137123,,-,B,-,A,B,-,A,B,A,A,B,B,A,A,A,B,A,B,A,B,A,A,B,A,B,A,A,B,A,B,A,A,B,A,A,B,A,B,B,B,A,A,A,A,A,A,B,A,B,B,B,B,B,-,A,A,A,A,B,A,A,A,B,B,B,B,A,B,A,B,A,A,A,A,A,A,A,A,B,A,A,B,A,B,B,-,A,B,B,B,A,A,A,B,A,B,B,B,B,B,B,-,A,A,A,A,A,B,A,A,A,-,A,A,B,B,A,A,A,B,B,A,A,B,B,A,B,B,A,A,B,B,B,A,A,B,B,A,B,A,-,B,-,A,A,A,A,A,-,B,B,A,B,A,A,A,B,B,B,B,A,B,A,B,-,A,B,B,A
S5_146406,,-,B,-,A,B,-,A,B,A,A,B,B,A,A,A,B,A,B,A,B,A,A,B,A,B,A,A,B,A,B,A,A,B,A,A,B,A,B,B,B,A,A,A,A,A,A,B,A,B,B,B,B,B,-,A,A,A,A,B,A,A,A,B,B,B,B,A,B,A,B,A,A,A,A,A,A,A,A,B,-,A,B,A,B,B,-,A,B,B,B,A,A,A,B,A,B,B,B,B,B,B,-,A,A,B,A,A,B,A,A,A,-,A,A,B,B,A,A,A,B,B,A,A,B,B,A,B,B,A,A,B,B,B,A,A,B,B,A,-,A,-,B,-,A,A,A,A,A,-,B,B,A,B,A,A,A,B,B,B,B,A,B,A,B,-,A,B,B,A
S5_152716,,-,B,-,A,B,-,A,B,A,A,B,B,A,A,A,B,A,B,A,B,A,A,-,A,B,A,A,B,A,B,A,A,B,A,A,B,A,B,B,B,A,A,A,A,A,A,B,A,B,B,B,B,B,B,A,A,A,A,B,A,A,A,-,B,B,B,A,B,A,B,A,A,A,-,A,A,A,A,B,-,A,B,A,B,B,-,A,B,B,B,-,A,A,B,A,B,B,B,B,B,B,-,A,A,B,A,A,B,A,A,A,B,A,A,B,B,A,A,A,B,B,A,A,B,B,A,B,B,A,A,B,B,B,A,A,B,B,A,-,A,B,B,-,A,A,A,A,A,-,B,B,A,B,A,A,A,B,B,B,B,A,B,A,B,-,A,B,B,A
S5_158877,,-,B,-,A,B,-,A,B,-,-,B,B,A,A,-,B,A,B,A,-,-,A,-,A,B,A,A,-,A,B,A,-,-,A,A,B,A,-,B,B,A,A,A,A,-,A,B,-,B,B,B,B,B,-,A,A,A,-,B,A,A,A,-,B,B,B,-,B,A,B,A,A,A,-,A,A,A,A,B,-,A,-,A,B,B,-,A,B,B,B,A,A,A,B,A,B,B,B,B,B,B,A,A,A,B,-,A,B,A,A,A,-,A,A,B,B,A,A,A,-,B,-,A,B,B,A,B,B,A,A,B,B,B,A,A,B,B,-,B,A,-,B,-,A,A,A,A,A,-,B,B,-,B,A,A,A,B,B,B,B,A,B,A,B,-,A,B,B,-
S5_168435,,-,B,-,A,-,-,A,B,A,A,B,B,A,A,-,B,A,B,A,B,-,A,-,A,B,A,A,B,A,B,A,-,B,A,A,-,A,B,B,B,A,A,A,A,A,A,B,A,B,B,B,B,B,B,A,A,A,A,B,A,A,A,-,B,B,B,A,B,A,B,A,A,A,-,A,A,A,A,B,-,A,B,A,B,-,-,A,B,B,B,A,A,A,B,A,B,B,B,B,B,B,A,A,A,B,A,A,B,A,A,A,-,A,A,B,B,A,A,A,B,B,A,A,B,B,A,B,-,A,A,-,-,B,A,A,-,B,A,-,A,-,B,-,A,A,A,A,A,-,B,-,A,B,A,A,A,B,-,B,B,A,B,-,B,-,A,B,B,A
S5_205698,,-,B,-,A,B,-,A,B,A,A,B,B,A,A,A,B,A,B,A,B,A,A,-,A,B,A,A,B,A,B,A,A,B,A,A,B,A,B,A,B,A,A,A,A,A,A,B,A,B,B,B,B,B,-,A,A,A,A,B,A,A,A,B,B,B,B,A,B,A,B,A,A,A,A,A,A,A,A,B,A,A,B,A,B,B,A,A,B,B,B,A,A,A,B,A,B,B,B,B,B,B,A,A,A,B,A,A,B,A,A,A,-,A,A,B,B,A,A,A,B,B,A,A,B,B,A,B,B,A,A,B,B,B,A,A,B,B,A,B,A,-,B,-,A,A,A,A,A,A,B,B,A,B,A,A,A,B,B,B,B,A,B,A,B,-,A,B,B,A
S5_214429,,-,B,-,A,A,B,A,B,A,A,B,B,A,A,A,B,A,B,A,B,A,A,-,A,B,A,A,B,A,B,A,A,B,A,A,B,A,-,A,B,A,A,A,A,-,A,B,-,B,B,B,B,B,-,A,A,A,A,B,A,A,A,-,-,B,B,A,B,A,B,A,-,A,-,A,A,A,A,B,-,A,-,A,-,B,-,A,B,B,B,A,A,A,B,A,B,-,B,B,B,B,A,A,A,B,A,A,B,A,A,A,-,A,A,B,-,A,A,A,B,B,A,A,B,-,A,B,B,-,A,B,B,B,A,A,-,B,A,-,A,-,B,-,A,A,A,A,A,-,B,B,A,B,A,A,-,B,-,B,B,A,B,A,B,-,A,-,B,-
S5_467616,,-,B,-,A,A,B,A,B,A,A,B,B,A,A,-,A,A,B,A,B,A,A,-,A,B,B,A,-,A,B,B,A,B,B,A,-,A,-,A,B,A,A,A,A,A,A,B,A,B,B,-,B,B,-,A,A,-,A,B,A,A,A,B,B,B,-,A,B,A,A,A,-,A,-,A,A,A,A,B,-,A,B,A,A,B,A,A,-,B,B,B,B,A,A,A,B,B,A,B,B,B,A,A,A,-,-,-,B,A,A,A,-,A,A,-,B,A,A,A,B,B,A,A,B,B,A,B,-,-,A,B,B,B,A,A,-,B,B,B,A,-,B,-,A,A,A,A,A,-,B,B,A,B,A,A,A,B,-,-,B,A,B,A,B,-,A,B,B,A
S5_491439,,-,B,-,A,A,B,A,B,A,-,B,B,A,A,A,A,A,B,A,B,A,A,-,A,B,B,A,-,A,B,B,A,B,B,A,B,A,-,A,B,A,A,A,A,-,A,B,-,B,B,B,B,B,-,A,A,B,A,B,A,A,A,-,B,B,B,-,B,A,A,A,A,A,-,A,A,A,A,B,-,A,B,A,A,B,A,A,B,B,B,B,A,A,A,A,B,B,A,B,-,B,A,A,A,B,A,B,B,A,A,A,-,A,A,B,B,A,A,-,B,B,A,A,B,B,A,B,B,B,A,B,B,B,A,A,-,B,B,-,A,B,B,-,A,A,A,A,A,-,B,B,A,B,A,A,-,B,-,A,-,A,B,A,B,-,A,B,B,-
S5_587318,,-,B,-,A,-,B,-,B,A,A,B,B,A,A,A,A,A,B,A,B,A,A,A,A,B,B,A,B,A,B,B,A,-,B,A,B,A,-,A,B,A,A,B,A,-,A,B,A,B,B,B,B,B,B,A,A,B,A,B,A,A,A,-,B,B,A,A,B,A,A,A,A,A,-,A,B,A,A,B,-,A,B,A,A,B,-,A,B,B,B,-,A,A,A,A,B,B,A,B,B,B,A,A,A,A,A,B,B,A,A,A,-,A,A,B,B,A,A,A,B,B,A,A,B,B,A,B,B,B,A,B,B,B,A,A,B,B,-,A,A,B,B,-,A,A,A,A,A,-,B,B,A,B,A,A,A,B,-,A,B,A,B,A,B,-,A,B,B,B
S5_694374,,-,B,-,A,A,B,A,B,A,A,B,-,A,A,A,A,A,-,A,-,A,A,B,A,B,B,A,-,A,B,-,A,-,B,A,B,A,-,A,B,A,A,B,B,A,-,A,A,-,B,-,B,B,-,A,A,B,A,B,A,A,A,-,B,-,A,-,B,A,A,B,A,A,-,A,B,A,A,-,A,A,-,A,A,B,A,A,B,B,B,-,A,A,B,B,B,B,A,B,B,B,A,A,A,B,A,B,A,A,B,A,-,A,A,-,-,A,A,A,B,B,A,A,B,B,A,B,B,B,A,-,B,B,A,A,B,B,-,-,A,-,B,-,A,A,A,A,A,-,-,B,A,B,A,B,A,B,A,A,A,A,B,A,B,-,A,B,A,B
S5_745413,,-,B,-,A,A,B,A,B,A,A,B,B,A,A,A,A,A,B,A,B,A,A,B,A,B,B,A,B,A,B,B,A,B,B,A,B,A,-,A,B,A,A,B,B,A,B,A,A,B,B,B,B,B,-,A,A,B,A,B,A,B,A,B,B,B,A,B,B,A,A,B,A,A,A,A,B,A,A,B,-,A,B,A,A,B,-,A,B,B,B,B,A,A,B,B,B,B,A,B,B,B,A,A,A,B,A,B,A,A,B,A,-,A,A,B,B,A,A,A,B,B,A,A,B,B,A,B,B,B,A,B,B,B,A,A,B,B,-,A,A,-,B,-,A,A,A,A,A,-,B,B,A,B,A,B,A,B,A,A,A,A,B,A,B,-,A,B,A,B
S5_851950,,-,B,A,A,A,B,A,B,A,A,B,B,A,A,A,A,A,-,A,B,A,A,-,A,B,B,A,B,A,B,B,A,-,B,A,-,A,A,A,B,A,A,A,B,A,B,A,A,B,B,-,B,B,-,A,A,-,A,B,A,B,A,-,A,B,A,-,B,A,A,B,A,A,-,A,B,A,A,-,-,A,A,A,A,B,A,-,B,B,B,-,A,A,B,B,B,B,A,B,B,B,A,A,A,B,A,B,A,A,-,A,A,A,A,B,B,A,A,A,B,B,A,A,B,B,B,B,B,-,A,B,B,B,A,A,-,B,-,-,A,A,B,-,A,A,A,A,A,-,B,B,A,B,A,B,A,B,A,A,A,A,B,A,B,-,A,B,A,B
S5_855551,,B,B,-,A,A,B,A,B,A,A,B,B,A,A,A,A,A,B,A,B,A,A,B,A,B,B,A,B,A,B,B,A,B,B,A,B,A,A,A,B,A,A,A,B,A,B,A,A,B,B,B,B,B,-,A,A,B,A,B,A,B,A,B,A,B,A,B,B,A,A,B,A,A,A,A,B,A,A,B,A,A,A,A,A,B,-,A,B,B,B,B,A,A,B,B,B,B,A,B,B,B,A,A,A,B,A,B,A,A,B,A,-,A,A,B,B,A,A,A,B,B,A,A,B,B,B,B,B,B,A,B,B,B,A,A,B,B,-,A,A,-,B,-,A,A,A,A,A,-,B,B,A,B,A,B,A,B,A,A,A,A,B,A,B,-,A,B,A,B
S5_908519,,-,B,-,A,A,B,-,B,A,A,B,B,A,A,A,B,A,B,A,B,A,A,B,A,B,-,A,B,A,B,B,A,B,B,A,B,A,A,A,B,A,A,A,B,A,B,A,A,B,B,B,B,B,A,A,A,B,A,B,A,-,A,-,A,B,A,B,B,A,A,B,A,A,-,B,B,A,A,B,-,A,A,A,A,A,-,A,-,B,B,B,A,-,B,B,B,B,A,B,B,B,A,A,A,B,-,B,A,A,B,A,-,A,A,B,B,A,A,A,B,B,A,A,B,B,B,B,B,B,A,B,B,B,A,A,B,B,A,-,A,-,B,-,A,A,A,B,A,-,B,B,A,B,A,B,A,B,A,A,A,A,B,A,B,-,A,B,A,B
S5_941883,,-,B,A,A,A,B,A,B,A,A,B,B,A,A,A,B,A,B,A,B,A,A,B,A,B,B,A,B,A,B,B,A,B,B,A,B,A,A,A,B,A,A,A,B,A,B,A,A,B,B,B,B,B,A,A,A,B,A,B,A,B,A,B,A,B,A,B,B,A,A,B,A,A,-,B,B,A,A,B,-,A,A,A,A,A,-,A,A,B,B,B,A,A,B,B,B,B,A,B,B,B,A,A,A,B,A,B,A,A,B,A,-,A,A,B,B,A,A,A,B,B,A,A,B,B,B,B,B,B,A,B,B,B,A,A,B,B,A,-,A,-,B,-,A,A,A,B,A,-,B,B,A,B,A,B,A,B,A,A,A,A,B,A,B,-,A,B,A,B
S5_950091,,-,B,-,A,A,B,A,B,A,A,B,-,A,A,A,B,A,B,A,B,A,A,-,A,B,B,A,B,A,B,B,A,B,B,A,B,A,A,A,B,A,A,A,B,A,B,A,A,B,B,B,B,B,A,A,A,B,A,B,A,B,A,-,A,B,A,B,B,A,A,B,A,A,A,B,B,A,A,B,B,A,A,A,A,A,A,A,A,B,B,B,A,A,B,B,B,B,A,B,B,B,A,A,A,B,A,B,A,A,B,A,-,A,A,B,B,A,A,A,-,B,A,A,B,B,B,B,B,B,A,B,B,B,A,A,-,B,A,-,A,-,B,-,A,A,A,B,A,-,B,B,A,B,A,B,A,B,A,A,B,A,B,A,B,-,A,B,A,B
S5_952673,,-,B,-,A,A,B,A,B,A,A,B,-,A,A,A,B,A,B,A,B,A,A,-,A,B,B,A,B,A,B,B,A,B,B,A,B,A,A,A,B,A,A,A,B,A,B,A,A,B,B,B,B,B,A,A,A,B,A,B,A,B,A,-,A,B,A,B,B,A,A,B,A,A,A,B,B,A,A,B,-,A,A,A,A,A,-,A,A,B,B,B,A,A,B,B,B,B,A,B,B,B,A,A,A,B,A,B,A,A,B,A,-,A,A,B,B,A,A,A,B,B,A,A,B,B,B,B,B,B,A,B,B,B,A,A,B,B,A,-,A,-,B,-,A,A,A,B,A,-,-,B,A,B,A,B,A,B,-,A,B,A,B,A,B,-,A,B,A,B
S5_1018126,,-,B,-,A,A,B,A,B,A,A,B,-,A,A,A,B,A,-,A,B,A,B,-,A,B,B,A,A,A,B,B,A,B,B,A,B,A,-,A,B,A,A,A,A,-,B,A,A,B,B,B,B,B,A,A,A,B,A,B,A,-,A,-,A,B,A,B,B,A,A,B,A,A,-,B,B,A,A,B,-,A,A,A,A,A,A,A,A,A,B,A,A,A,B,B,B,B,A,B,B,A,A,A,A,B,A,B,B,B,B,A,-,A,A,B,B,A,A,A,B,B,A,A,B,B,B,B,B,-,A,B,B,B,A,A,-,B,-,-,A,A,B,-,A,A,A,B,A,-,B,B,A,B,A,B,A,B,A,A,B,A,B,A,B,A,A,B,A,B
S5_1078911,,-,B,-,A,-,B,-,A,A,A,B,B,A,A,-,B,B,B,A,B,A,B,-,A,B,B,A,A,A,B,B,A,B,B,-,B,A,-,A,B,A,A,A,A,-,B,A,B,B,B,B,B,B,A,A,A,B,A,B,A,B,A,B,A,-,A,A,B,A,A,B,A,-,-,B,B,A,A,B,-,A,A,A,A,A,A,A,A,A,B,-,A,A,B,A,B,-,A,B,B,A,A,A,A,B,A,B,A,B,B,A,-,A,A,B,-,A,A,A,B,B,A,A,B,B,B,B,B,B,A,B,B,B,A,A,B,B,B,-,A,-,B,-,A,A,-,B,A,-,B,B,-,B,A,B,A,B,A,A,B,A,B,A,B,-,A,-,A,B
S5_1084797,,-,B,-,A,-,B,A,A,A,A,B,B,A,A,-,B,B,B,A,B,-,B,-,A,B,B,A,A,A,B,B,A,B,B,A,B,A,A,A,B,A,A,A,A,A,B,A,B,B,B,B,B,B,A,A,A,B,A,B,A,B,A,-,A,A,A,A,B,A,A,B,A,B,-,B,B,A,A,B,-,A,-,A,A,A,A,A,A,A,B,A,A,A,B,A,B,B,A,B,B,A,A,A,A,B,A,B,A,B,B,A,A,A,A,B,B,A,A,A,B,B,A,A,B,B,B,B,B,B,A,B,B,B,A,A,B,B,-,-,A,-,B,-,-,A,A,B,A,-,B,B,A,B,A,B,-,B,-,A,B,A,B,A,B,-,A,B,A,B
S5_1086502,,-,-,-,A,A,B,A,A,A,A,B,B,A,A,A,B,B,-,A,B,A,B,-,A,B,B,A,A,A,B,-,A,B,B,A,B,A,-,A,B,A,A,A,A,-,B,A,B,B,B,B,B,B,A,A,A,B,A,-,A,B,A,-,A,A,-,A,B,A,A,B,-,B,-,B,B,A,A,B,-,A,-,A,-,A,A,A,A,A,B,A,A,A,B,A,B,B,A,B,B,A,A,A,A,B,A,B,A,B,-,A,-,A,A,B,B,A,A,-,B,B,A,A,B,B,B,B,-,-,A,B,B,B,A,A,-,B,-,-,A,-,B,-,-,A,A,B,A,-,B,B,-,B,A,B,-,B,A,A,B,A,B,A,B,A,A,B,A,-
S5_1102713,,-,B,-,A,-,B,A,A,A,A,B,B,A,A,A,B,B,B,A,B,A,B,B,A,B,B,A,A,A,B,B,A,B,B,A,B,A,A,A,B,A,A,A,A,A,B,A,B,B,B,B,B,B,A,A,A,B,A,B,A,B,A,-,A,A,A,A,B,A,A,B,A,-,-,B,B,A,A,B,-,A,A,A,A,A,A,A,A,A,B,A,A,A,B,A,B,B,A,B,B,A,A,A,A,B,A,B,A,B,B,A,-,A,A,B,B,A,A,A,B,B,A,A,B,B,B,B,B,B,A,B,B,B,A,A,-,B,-,B,A,-,B,-,A,-,A,B,A,-,B,B,A,B,A,B,A,B,A,A,B,A,B,A,B,-,A,B,A,B
S5_1133906,,-,B,-,A,A,B,A,A,A,-,B,-,A,A,A,B,B,B,A,B,A,B,B,A,B,B,A,A,A,B,-,A,-,B,-,B,A,A,A,B,A,A,A,A,A,B,A,B,B,B,B,B,B,A,A,A,B,A,B,A,B,A,-,A,A,A,-,B,A,A,B,A,-,-,B,B,A,A,B,-,A,-,A,A,A,A,A,A,A,B,A,A,A,B,A,B,B,A,B,B,A,A,A,A,B,A,B,A,B,B,A,-,A,A,B,-,A,A,A,-,B,A,A,B,B,B,B,-,-,A,B,B,B,A,A,-,B,B,-,A,-,B,-,A,A,A,A,A,-,B,B,-,B,A,B,A,B,-,A,B,A,B,A,B,-,A,B,A,B
S5_1179330,,-,B,-,A,A,B,A,A,A,A,B,A,B,A,A,B,B,B,A,B,A,A,-,A,B,B,A,A,A,B,B,A,B,B,A,B,A,A,B,B,A,A,A,A,A,B,A,B,B,B,B,B,B,A,A,A,B,A,B,A,B,A,B,A,A,A,A,B,A,A,B,A,-,-,B,B,A,A,B,-,A,A,A,A,A,A,A,A,A,-,A,A,A,B,A,B,B,A,B,B,A,A,A,A,B,A,B,A,B,B,A,-,A,A,B,B,A,A,A,B,B,A,A,B,B,B,B,A,B,A,B,B,B,A,A,B,B,-,-,A,-,B,-,A,B,A,A,A,-,B,B,A,B,A,B,A,B,A,A,B,A,B,A,B,-,A,B,A,B
S5_1185646,,-,B,-,A,A,B,A,A,A,A,B,A,B,A,A,B,B,B,A,B,A,A,B,A,B,B,A,A,A,B,B,A,B,B,A,B,A,A,B,B,A,A,A,A,A,B,A,B,B,B,B,B,A,A,A,A,B,A,B,A,B,A,B,A,A,A,A,B,A,A,B,A,-,A,B,B,A,A,B,B,A,A,A,A,A,A,A,A,A,-,A,A,A,B,A,B,B,A,B,B,A,A,A,A,B,A,B,A,B,B,A,-,A,A,B,B,A,A,A,B,B,A,A,B,B,B,B,A,B,A,B,B,B,A,A,B,B,-,-,A,-,B,-,A,B,A,A,A,-,B,B,A,B,A,B,B,B,A,A,B,A,B,A,B,-,A,B,A,B
S5_1194327,,-,B,-,A,-,B,A,A,A,A,B,A,B,A,A,B,B,B,A,B,A,A,-,A,B,B,A,A,A,B,B,A,-,B,A,B,A,A,B,B,A,A,A,A,A,B,A,B,B,B,B,B,A,A,A,A,B,A,B,A,B,A,-,A,A,A,A,B,A,A,B,A,-,-,B,B,A,A,B,B,A,A,A,A,A,A,A,A,A,-,A,A,A,B,A,B,B,A,B,B,A,A,A,A,B,A,B,A,B,B,A,-,A,A,B,B,A,A,A,B,B,A,A,B,B,B,B,A,B,A,B,B,B,A,A,-,B,-,-,A,-,B,-,A,B,A,A,A,-,B,B,A,B,A,B,B,B,A,A,B,A,B,A,B,-,A,B,A,B
S5_1196416,,-,B,-,A,A,B,A,A,A,A,B,A,B,A,A,B,B,B,A,B,A,A,-,A,B,B,A,A,A,B,B,A,B,B,A,B,A,-,B,B,A,A,A,A,A,B,A,B,-,B,B,B,A,A,A,A,B,A,B,A,B,A,-,A,A,A,A,B,A,A,B,A,-,-,B,B,A,A,B,B,A,A,A,A,A,A,A,A,A,-,A,A,A,B,A,B,B,A,B,-,A,A,A,A,B,A,B,A,B,B,A,-,A,A,-,B,A,A,A,B,B,A,A,B,B,B,B,A,-,A,B,B,B,A,A,B,B,A,-,A,-,B,-,A,B,A,A,A,-,B,B,-,B,A,B,B,B,A,A,B,A,B,A,B,-,A,B,A,B
S5_1200252,,-,B,-,A,A,B,A,A,A,A,B,A,B,A,A,B,B,B,A,B,A,A,-,A,B,B,A,A,A,B,B,A,B,B,A,B,A,A,B,B,A,A,A,A,A,B,A,B,B,B,B,B,A,A,A,A,B,A,B,A,B,A,B,A,A,A,A,B,A,A,B,A,-,A,B,B,A,A,B,-,A,A,A,A,A,A,A,A,A,-,A,A,A,B,A,B,B,A,B,B,A,A,A,A,B,A,B,A,B,B,A,-,A,A,B,B,A,A,A,B,B,A,A,B,B,B,B,A,B,A,B,B,B,A,A,-,B,A,A,A,-,B,-,A,B,A,A,A,-,B,B,A,B,A,B,B,B,A,A,B,A,B,A,B,-,A,B,A,B
S5_1278273,,B,B,-,A,A,B,A,A,A,A,B,A,B,A,A,B,B,B,A,B,A,A,B,A,B,B,A,A,A,B,B,A,B,B,A,B,A,A,B,B,A,A,A,A,A,B,A,B,B,B,B,B,A,A,A,A,B,A,B,A,B,A,-,A,A,A,A,B,A,A,B,A,-,A,-,B,A,A,B,-,A,A,A,A,A,B,A,A,A,-,A,A,A,B,A,B,B,A,B,B,A,A,A,A,B,A,B,A,B,A,A,A,A,A,B,B,A,A,A,B,B,A,A,B,B,A,B,A,B,A,B,B,B,A,B,B,B,-,-,A,-,B,-,A,B,A,A,A,-,B,B,A,B,A,B,B,B,A,A,B,A,B,A,B,-,A,B,A,B
S5_1286380,,-,B,-,A,A,B,A,A,A,A,B,A,B,A,A,B,B,B,A,B,A,A,B,A,B,B,A,A,A,B,B,A,B,B,A,B,A,A,B,B,A,A,A,A,A,B,A,B,B,B,B,B,A,A,A,A,B,A,B,A,B,A,B,A,A,A,A,B,A,A,B,A,-,-,-,B,A,A,B,-,A,A,A,A,A,B,A,A,A,B,A,A,A,B,A,B,B,A,B,B,A,A,A,A,B,A,B,A,B,A,A,A,A,A,B,B,A,A,A,B,B,A,A,B,B,A,B,A,B,A,B,B,B,A,B,B,B,-,A,A,-,B,-,A,B,A,A,A,B,B,B,A,B,A,B,B,B,A,A,B,A,B,A,B,A,A,B,A,B
S5_1412470,,-,B,-,A,A,B,A,A,A,A,B,A,B,A,-,B,B,B,A,B,A,A,-,A,B,B,A,A,A,B,B,A,-,B,A,B,B,-,B,B,A,A,A,A,A,B,A,B,B,B,B,B,A,A,A,A,B,A,B,A,B,A,-,A,A,A,A,B,A,A,B,A,B,-,-,A,A,A,B,-,A,A,A,A,A,B,A,A,A,B,A,A,A,B,A,B,B,A,B,B,A,A,A,A,B,A,A,A,B,A,A,-,A,A,B,B,A,A,A,B,B,A,A,B,B,A,B,A,B,A,B,B,-,A,B,-,B,B,-,A,-,B,-,A,B,A,A,A,-,B,A,A,B,A,B,B,B,A,A,B,A,B,A,B,-,A,B,A,B
S5_1424798,,-,B,-,A,A,B,A,A,A,A,B,A,B,A,A,B,B,B,A,B,A,A,-,A,B,B,A,A,A,B,B,A,B,B,A,B,B,A,B,B,A,B,A,A,A,B,A,B,B,B,B,B,A,A,A,A,B,A,B,A,B,A,-,A,A,A,A,B,A,A,B,A,B,A,-,A,A,A,B,-,A,A,A,A,A,B,A,A,A,B,A,A,A,B,A,B,B,A,B,B,A,A,A,A,B,A,A,A,B,A,A,-,A,A,B,B,A,A,A,B,B,A,A,B,B,A,B,A,B,A,B,B,B,A,B,B,B,-,-,A,-,B,-,A,B,A,A,A,-,B,A,A,B,A,B,B,B,A,A,B,A,B,A,B,-,A,B,A,B
S5_1459141,,-,B,-,A,-,B,A,A,A,A,B,A,B,A,A,B,B,B,A,B,A,A,-,A,B,B,A,A,A,B,B,A,B,B,A,B,B,A,B,B,A,B,A,A,A,B,A,B,B,B,B,B,A,A,A,A,B,A,B,A,B,A,-,A,A,A,A,B,A,A,B,A,B,-,-,A,A,A,B,-,A,A,A,A,A,B,A,A,A,B,A,A,A,B,A,B,B,A,B,B,A,A,A,A,B,A,A,A,B,A,A,-,A,A,B,B,A,A,A,B,B,A,A,B,B,A,B,A,B,A,B,B,B,A,B,-,B,-,-,A,A,B,-,A,B,A,A,A,-,B,A,A,B,A,B,B,B,A,A,B,A,B,A,B,-,A,B,A,B
S5_1476281,,-,B,-,A,A,B,A,A,A,A,B,A,B,A,A,B,B,B,A,B,B,A,-,A,B,B,A,-,A,B,B,A,B,B,A,B,B,A,B,B,A,B,A,A,-,B,A,B,B,B,B,B,A,A,A,A,B,A,B,A,B,A,B,A,A,A,A,B,A,A,B,A,B,-,A,A,A,A,B,-,A,A,A,-,A,B,A,A,A,B,A,A,A,B,A,B,B,A,B,B,A,A,A,A,B,A,A,A,-,A,A,-,A,A,B,B,A,A,A,B,B,A,A,B,B,A,B,A,B,A,B,B,B,A,B,-,B,-,-,A,A,B,-,A,B,A,A,A,-,B,A,A,B,A,B,B,B,A,A,B,A,B,A,B,-,A,B,-,B
S5_1579701,,-,B,-,A,A,A,A,A,A,A,B,A,B,A,A,B,B,B,A,B,B,B,-,A,B,B,A,A,A,B,B,A,B,B,A,B,B,B,B,B,A,B,A,A,A,B,A,B,B,B,B,B,A,A,A,A,B,A,B,A,B,A,B,A,A,A,A,B,A,A,B,A,B,-,-,A,A,A,B,-,A,B,A,A,A,A,A,A,A,B,A,A,A,B,A,B,B,A,B,B,A,A,A,A,B,A,A,A,B,A,A,B,A,B,B,B,A,A,A,B,B,A,A,B,B,A,B,A,B,A,B,B,B,A,B,B,B,A,A,A,-,B,-,A,B,A,A,A,-,B,A,A,B,A,B,B,B,A,A,B,A,B,A,B,A,A,B,A,B
S5_1589887,,-,B,-,A,A,A,A,A,A,A,B,A,B,A,A,B,B,B,A,B,B,B,B,A,B,B,A,A,A,B,B,A,B,B,A,B,B,B,B,B,A,B,A,A,A,B,A,B,B,B,B,B,A,A,A,A,B,A,B,A,B,A,-,A,A,A,A,B,A,A,B,A,B,-,-,A,A,A,B,-,A,B,A,A,A,A,A,A,A,-,A,A,A,B,A,B,B,A,B,B,A,A,A,A,B,A,A,A,B,A,A,-,A,B,B,B,A,A,A,B,B,A,A,B,B,A,B,A,B,A,B,B,B,A,B,B,B,A,-,A,-,B,-,A,B,A,A,A,-,B,A,A,B,A,B,B,B,A,A,B,A,B,A,B,-,A,B,A,B
S7_57007,,-,B,-,B,A,A,A,B,A,A,B,B,B,A,A,B,A,A,B,A,A,B,-,A,A,A,B,A,B,B,A,A,B,A,B,A,A,B,A,B,A,B,A,A,A,B,B,B,B,B,B,B,A,B,A,B,A,B,A,B,A,A,A,B,A,A,B,A,B,A,B,A,A,-,B,B,B,A,-,B,A,A,B,A,A,A,A,A,A,A,B,A,B,B,B,B,A,A,B,A,B,A,A,A,B,B,A,A,B,A,B,-,A,A,A,A,B,B,B,B,A,A,B,B,B,A,B,B,A,A,B,B,B,B,A,B,B,B,A,B,-,A,-,B,A,A,A,B,-,B,B,A,A,B,B,B,A,B,A,B,A,B,A,A,A,B,A,B,B
S7_139398,,-,B,-,B,-,A,-,B,A,A,-,B,B,B,A,B,A,A,B,A,A,B,-,A,A,B,B,A,B,B,A,A,B,A,B,A,A,B,A,B,A,B,A,A,A,B,B,B,B,B,B,B,A,B,A,B,A,B,A,B,A,A,A,B,A,A,B,B,B,A,B,B,A,B,B,B,B,A,A,-,A,A,B,A,A,A,A,-,A,A,B,A,B,B,B,B,A,A,B,B,B,-,A,A,B,B,A,A,B,A,B,-,A,A,A,A,B,B,B,B,A,B,B,B,B,A,B,B,A,A,B,B,B,B,A,A,B,B,-,B,-,A,-,B,-,A,A,B,-,B,B,A,A,B,A,B,A,-,A,B,A,B,A,A,-,A,A,B,B
S7_194591,,-,B,A,B,A,A,-,B,A,A,B,-,B,B,A,B,A,A,B,A,A,B,-,A,A,B,B,A,B,B,A,A,-,A,B,A,A,B,A,A,A,B,A,A,A,B,B,B,B,B,B,B,A,B,A,B,A,B,A,B,A,A,A,B,A,A,B,B,B,A,B,A,A,-,B,B,B,A,A,B,A,A,B,A,A,A,A,A,A,A,-,A,B,B,B,B,A,A,B,B,B,A,A,A,B,B,A,A,B,A,B,-,A,A,A,A,B,B,B,-,A,B,B,B,B,A,B,B,A,A,B,B,B,-,A,A,B,B,-,B,A,A,-,B,A,A,A,B,-,B,B,A,A,B,A,B,A,B,A,B,A,B,A,A,-,-,A,B,B
S7_330849,,-,B,-,A,A,A,B,B,A,A,B,B,B,B,-,B,A,A,B,A,A,B,A,A,A,B,B,A,B,B,A,A,B,A,B,A,-,B,A,A,A,B,A,A,-,B,B,B,B,B,B,B,A,B,A,B,A,B,A,B,A,A,A,B,A,A,B,B,B,A,B,A,A,-,B,B,B,A,A,-,A,A,B,A,A,A,A,A,A,A,B,A,-,B,B,B,A,A,B,B,B,A,A,A,B,B,A,B,B,A,B,-,A,A,A,A,B,B,B,B,A,B,B,B,B,A,B,B,A,A,B,B,B,B,B,-,B,A,-,B,A,A,-,B,A,A,A,B,-,B,B,A,A,B,A,B,A,B,A,B,A,B,A,A,-,-,A,B,B
S7_394291,,-,B,-,A,-,A,B,B,A,A,B,-,B,B,A,B,A,A,B,A,A,B,-,A,A,B,B,A,B,B,A,A,B,A,B,A,A,-,A,A,A,B,A,A,-,B,B,B,B,B,B,B,A,B,A,B,A,B,A,B,A,A,A,B,A,A,B,B,B,A,B,A,A,B,B,B,B,A,A,-,A,A,B,A,A,A,A,A,A,A,B,A,B,B,B,B,-,A,B,B,A,A,A,A,B,B,A,B,B,A,B,-,A,A,A,A,B,B,B,B,A,B,B,B,B,A,B,B,A,A,B,B,B,B,B,A,B,A,-,B,A,A,-,B,A,A,A,B,-,B,B,A,A,B,A,B,A,B,A,B,A,B,B,A,-,-,A,B,B
S7_435357,,-,A,-,A,A,A,-,B,A,A,B,B,B,B,-,B,A,A,B,A,A,B,-,A,A,B,B,A,B,B,A,A,B,A,B,A,A,-,A,A,A,B,A,A,A,B,B,B,B,B,B,B,A,B,A,B,A,B,A,A,A,A,-,B,A,A,B,B,B,A,B,A,A,B,-,B,B,A,A,-,A,A,B,A,A,A,A,A,A,A,B,A,B,B,B,B,A,A,B,B,A,A,A,A,B,A,A,B,-,A,B,-,A,A,A,A,B,A,B,-,A,B,B,B,B,A,A,B,A,A,B,B,B,B,B,-,B,A,-,B,A,A,-,B,A,A,A,B,-,B,B,A,A,B,A,-,A,B,A,B,A,B,B,A,-,B,A,B,B
S7_441099,,-,A,-,A,A,A,B,B,A,A,B,B,B,B,A,B,A,A,B,A,A,B,-,A,A,B,B,A,B,B,A,A,B,A,B,A,A,B,A,A,A,B,A,A,A,B,B,B,B,B,B,B,A,B,A,B,A,B,A,A,A,A,A,B,A,A,B,B,B,A,B,A,A,B,B,B,B,A,A,B,A,A,B,A,A,A,A,A,A,A,B,A,B,B,B,B,A,A,B,B,A,A,A,A,B,A,A,B,B,A,B,-,A,A,A,A,B,-,B,B,A,B,B,B,B,A,A,B,A,A,B,B,B,B,B,A,B,A,A,B,A,A,-,B,A,A,A,B,-,B,B,A,A,B,A,B,A,B,A,B,A,B,B,A,-,-,A,B,B
S7_442118,,-,A,-,A,A,A,B,B,A,A,B,B,B,B,A,B,A,A,B,A,A,B,-,A,A,B,B,A,B,B,A,A,B,A,B,A,A,B,A,A,A,B,A,A,A,B,B,B,B,B,B,B,A,B,A,B,A,B,A,A,A,A,-,B,A,A,B,B,B,A,B,A,A,-,B,B,B,A,A,-,A,A,B,A,A,A,A,A,A,A,B,A,B,B,B,B,A,A,B,B,A,A,A,A,B,A,A,B,B,A,B,-,A,A,A,A,B,-,B,B,A,B,B,B,B,A,A,B,A,A,B,B,B,B,B,A,B,A,-,B,-,A,-,B,-,A,A,B,-,B,B,A,A,B,A,B,A,B,A,B,A,B,B,A,-,-,A,B,B
S7_518290,,-,A,-,A,-,A,B,B,A,A,B,B,B,B,A,B,A,A,B,A,A,B,-,A,A,B,B,A,B,B,A,A,B,A,B,A,A,-,A,A,A,B,A,A,-,B,B,B,B,B,B,B,A,B,A,B,A,B,A,A,A,A,-,B,A,A,-,B,B,A,B,A,A,-,B,B,B,A,A,-,A,A,B,A,A,B,-,A,A,A,B,A,B,B,B,B,A,A,B,B,A,A,A,A,B,A,A,B,B,A,B,-,A,A,A,A,B,-,B,B,A,B,B,B,B,A,A,B,A,A,B,B,B,B,B,A,B,A,-,B,A,A,-,B,A,A,A,B,-,B,B,A,A,B,A,A,A,-,A,B,A,-,B,A,-,B,A,B,B
S7_536285,,-,A,-,A,A,A,B,B,A,A,B,B,B,B,-,B,A,A,B,A,A,B,-,A,A,B,B,A,B,B,A,A,B,A,B,A,A,B,A,A,A,B,A,A,A,B,B,B,B,B,B,B,A,B,A,B,A,B,A,A,A,A,A,B,A,A,B,B,B,A,B,A,A,-,B,B,B,A,A,B,A,A,B,A,A,B,A,A,A,A,B,A,B,B,B,B,A,A,B,B,A,A,A,A,B,A,A,A,B,A,B,B,A,A,A,A,B,-,B,B,A,B,B,B,B,A,A,B,A,A,B,B,B,B,B,A,B,A,-,B,A,A,A,B,A,A,A,B,-,B,B,A,A,B,A,A,A,B,A,B,A,B,B,A,-,-,A,B,B
S7_546350,,-,A,-,A,A,A,B,B,A,A,B,B,B,B,A,B,A,A,B,A,A,B,-,A,A,B,B,A,B,B,A,A,B,A,B,A,A,B,A,A,A,B,A,A,A,B,B,B,B,B,B,B,A,B,A,B,A,B,A,A,A,A,A,B,A,A,B,B,B,A,B,A,A,B,B,B,B,A,A,-,A,A,B,A,A,B,A,A,A,A,B,A,B,B,B,B,A,A,B,B,A,A,A,A,B,A,A,A,B,A,B,B,A,A,A,A,B,-,B,B,A,B,B,B,B,A,A,B,A,A,B,B,B,B,B,A,B,A,B,B,A,A,-,B,A,A,A,B,-,B,B,A,A,B,A,A,A,B,A,B,A,B,B,A,-,-,A,B,B
S7_568215,,-,A,-,A,A,A,B,B,A,A,B,B,B,B,A,B,A,A,B,A,A,B,-,A,A,B,B,A,B,B,A,A,B,A,B,A,A,B,A,A,A,B,A,A,A,B,B,B,B,B,B,B,A,B,A,B,A,B,A,A,A,A,A,B,A,A,B,B,B,A,B,A,A,-,B,B,B,A,A,-,A,A,B,A,A,B,A,A,A,A,B,A,B,B,B,B,A,A,B,B,A,A,A,A,B,A,A,A,B,A,B,-,A,A,A,A,B,-,B,B,A,B,B,B,B,A,A,B,A,A,B,B,B,B,B,A,B,A,B,B,A,A,-,B,A,A,A,B,A,B,B,A,A,B,A,A,A,B,A,B,A,B,B,A,-,-,A,B,B
S7_606584,,-,B,-,A,A,A,B,B,A,A,B,B,B,B,A,B,A,A,B,A,A,B,-,A,A,B,B,A,B,B,A,A,B,A,B,A,A,B,A,A,A,B,A,A,A,B,B,B,B,B,B,B,A,B,A,B,A,B,A,A,A,A,A,B,A,B,B,B,B,A,B,A,A,-,B,B,B,A,A,B,A,A,B,A,A,B,A,A,A,A,B,A,B,B,B,B,A,A,B,B,A,A,A,A,B,A,A,A,B,A,B,B,A,A,A,A,B,-,B,B,A,B,B,B,B,A,A,B,A,A,B,B,B,B,B,-,B,A,B,B,A,A,-,B,A,A,A,B,-,B,B,A,A,B,A,A,A,B,A,B,A,B,B,A,-,-,A,B,B
S8_6246,,-,B,-,A,A,A,A,A,B,-,B,B,B,A,A,B,B,A,A,B,B,B,A,B,B,A,A,B,B,A,B,B,A,A,B,A,B,A,A,B,A,B,A,B,A,B,B,A,B,A,B,A,A,B,A,-,A,A,A,-,B,B,A,B,A,A,A,A,B,B,B,B,B,-,A,B,B,A,B,-,B,A,A,A,A,A,A,A,B,B,B,B,B,A,A,A,A,B,A,B,B,B,B,A,A,A,B,A,B,B,B,-,A,A,B,B,B,B,B,A,A,A,B,A,B,A,B,B,B,B,B,A,A,A,A,B,B,B,A,A,-,A,-,B,B,A,B,A,-,B,B,B,A,B,A,A,B,A,A,A,A,A,B,B,-,B,A,B,A
S8_9152,,A,B,-,A,A,A,A,A,B,A,B,B,B,A,A,B,B,A,A,B,B,B,-,B,B,A,A,B,B,A,B,B,A,A,B,A,B,A,A,B,A,B,A,B,A,B,B,A,B,A,B,A,A,B,A,-,A,A,A,-,B,B,A,B,A,A,A,A,B,B,B,B,B,B,A,B,B,A,B,B,B,A,A,-,A,A,A,A,B,B,B,B,B,A,A,A,A,B,A,B,B,B,B,A,A,A,B,A,B,B,B,B,A,A,B,B,B,B,B,A,A,A,B,A,B,A,B,B,B,B,B,A,A,A,A,B,B,B,A,A,-,A,-,B,B,A,B,A,B,B,B,B,A,B,A,A,B,A,A,A,A,A,B,B,-,B,A,B,A
S8_32221,,-,B,-,A,A,A,A,A,B,A,B,-,B,A,A,B,B,A,A,B,B,B,-,B,B,A,A,B,B,A,B,B,A,A,B,A,B,A,A,B,A,B,A,B,A,B,B,A,B,A,B,A,A,B,A,B,A,A,A,-,B,B,-,B,A,A,A,A,B,B,B,B,B,-,A,B,B,A,B,-,B,A,A,A,A,A,A,A,B,B,B,B,-,A,A,A,A,B,A,B,B,B,B,A,A,A,B,A,B,B,B,-,A,A,B,-,B,B,B,A,A,A,B,A,B,A,B,B,B,B,B,A,A,A,A,-,B,B,A,A,-,A,-,B,B,A,B,A,-,B,B,B,A,B,A,A,B,-,A,A,A,A,B,B,-,B,A,B,A
S8_44134,,-,B,-,A,A,A,A,A,B,A,B,B,B,A,A,B,B,A,A,B,B,B,-,B,B,A,A,B,B,A,B,B,A,A,B,A,B,A,A,B,A,B,A,B,-,B,B,A,B,A,B,A,A,B,A,B,A,A,A,-,B,B,A,B,A,A,A,A,B,B,B,B,B,B,A,B,B,A,B,-,B,A,A,A,A,A,A,A,B,B,B,B,B,A,A,A,A,B,A,B,B,B,B,A,A,A,B,A,B,B,B,B,A,A,B,B,B,B,-,A,A,A,B,A,B,A,B,B,B,B,B,A,A,A,A,B,B,B,-,A,-,A,-,B,B,A,B,A,-,B,B,B,A,B,A,A,B,A,A,A,A,A,B,B,-,B,A,B,A
S8_48246,,-,B,-,A,A,A,A,A,B,A,B,B,B,A,A,B,B,A,A,B,B,B,A,B,B,A,A,B,B,A,B,B,A,A,B,A,B,A,A,B,A,B,A,B,A,B,B,A,B,A,B,A,A,B,A,-,A,A,A,-,B,B,-,B,A,A,A,A,B,B,B,B,B,B,A,B,B,A,B,B,B,A,A,-,A,A,A,A,B,B,B,B,B,A,A,A,A,B,A,B,B,B,B,A,A,A,B,A,B,B,B,-,A,A,B,B,B,B,B,A,A,A,B,A,B,A,B,B,B,B,B,A,A,A,A,B,B,B,A,A,-,A,-,B,-,A,B,A,B,B,B,B,A,B,A,A,B,A,A,A,A,A,B,B,-,B,A,B,A
S8_141889,,-,B,-,A,A,A,-,A,B,A,B,B,B,A,B,B,B,A,A,B,B,B,-,B,B,A,A,B,B,A,B,B,A,A,B,A,B,A,A,B,A,B,A,B,A,B,B,A,B,A,B,A,A,B,A,-,B,A,A,-,B,B,A,B,A,A,A,A,B,B,B,B,B,-,A,B,B,A,B,-,B,A,A,B,A,A,A,A,B,B,B,B,B,A,A,A,A,B,A,B,B,B,B,A,A,A,B,A,B,B,B,-,A,A,A,B,B,B,B,A,A,A,-,A,B,A,B,B,B,B,B,A,-,A,A,-,B,B,-,A,-,A,-,B,B,A,B,A,-,B,B,B,A,B,A,A,B,A,A,A,A,A,B,B,-,B,A,B,A
S8_177765,,-,B,-,A,A,A,A,A,B,A,B,B,B,A,B,B,B,A,A,B,B,B,A,B,B,A,A,B,B,A,B,B,A,B,B,A,B,A,A,B,A,B,A,B,A,B,B,A,B,A,B,A,A,B,A,B,B,A,A,-,B,B,B,B,A,A,A,A,B,B,B,B,B,B,A,B,B,A,B,B,B,A,A,B,A,A,A,A,B,B,B,B,B,A,A,A,A,B,B,B,B,B,B,A,A,A,B,A,B,B,B,B,A,A,A,B,B,B,B,A,A,A,B,A,B,A,B,B,B,B,B,A,-,A,A,B,B,B,A,A,-,A,-,B,B,A,B,A,-,B,B,B,A,B,A,A,B,A,A,A,A,A,B,B,-,B,A,B,A
S8_179818,,-,B,-,A,A,A,A,A,B,A,B,B,B,A,B,B,B,A,A,B,B,B,A,B,B,A,A,B,B,A,B,B,A,B,B,A,B,A,A,B,A,B,A,B,A,B,B,A,B,A,B,A,A,B,A,B,B,A,A,-,B,B,B,B,A,A,A,A,B,B,B,B,B,-,A,B,B,A,B,B,B,A,A,B,A,A,A,A,B,B,B,B,B,A,A,A,A,B,B,B,B,B,B,A,A,A,B,A,B,B,B,-,A,A,A,B,B,B,B,A,A,A,B,A,B,A,B,B,B,B,B,A,-,A,A,B,B,B,A,A,-,A,B,B,-,A,B,A,-,B,B,-,A,B,A,A,B,A,A,A,A,A,B,B,-,B,A,B,A
S8_233189,,-,B,-,A,A,A,A,A,B,A,B,B,B,A,B,B,B,A,A,B,B,B,-,B,B,A,A,B,B,A,B,B,A,B,B,A,B,A,A,B,A,B,A,B,A,B,B,A,B,A,B,A,A,B,A,B,B,A,A,-,B,B,-,B,A,A,A,A,B,B,B,B,B,-,A,B,B,A,B,B,B,A,A,B,A,A,A,A,B,B,B,B,B,A,A,A,A,B,B,B,B,B,B,A,A,A,B,A,B,B,B,-,A,A,A,B,B,B,B,-,A,A,B,A,B,A,B,B,B,B,B,A,-,A,A,-,B,B,-,A,-,A,-,B,B,A,B,A,-,B,B,B,A,B,A,A,B,A,A,A,A,A,B,B,-,B,A,B,A
S8_234845,,A,B,-,A,A,A,A,A,B,A,B,B,B,A,B,B,B,A,A,B,B,B,-,B,B,A,A,B,B,A,B,B,A,B,B,A,B,A,A,B,A,B,A,B,A,B,B,A,B,A,B,A,A,B,A,B,B,A,A,B,B,B,B,B,A,A,A,A,B,B,B,B,B,-,A,B,B,A,B,-,B,A,A,B,A,A,A,A,B,B,B,B,B,A,A,A,A,B,B,B,B,B,B,A,A,A,B,A,B,B,B,-,A,A,A,B,B,B,B,A,A,A,B,A,B,A,B,B,B,B,B,A,-,A,A,B,B,B,A,A,A,A,-,B,B,A,B,A,-,B,B,B,A,B,A,A,B,A,A,A,A,A,B,B,-,B,A,B,A
S8_240837,,-,B,-,A,A,A,A,A,B,A,B,B,B,A,B,B,B,A,A,B,B,B,A,B,B,A,A,B,B,A,B,B,A,B,B,A,B,A,A,B,A,B,A,B,-,B,B,A,B,A,B,A,A,B,A,B,B,A,A,B,B,B,-,B,A,A,A,A,B,B,B,B,B,-,A,B,B,A,B,B,B,A,A,B,A,A,A,A,B,B,B,B,B,A,A,A,A,B,B,B,B,B,B,A,A,A,B,A,B,B,B,-,A,A,A,B,B,B,B,A,A,A,B,A,B,A,B,B,B,B,B,A,-,A,A,B,B,B,-,A,A,A,-,B,B,A,B,A,-,B,B,B,A,B,A,A,B,A,A,A,A,A,B,B,-,B,A,B,A
S8_328643,,-,B,-,A,A,A,A,A,B,A,B,A,B,A,-,B,B,A,A,B,B,B,A,B,B,A,A,B,B,A,-,B,A,B,B,A,B,A,A,B,A,B,A,B,A,B,B,A,B,A,B,A,A,B,A,B,B,A,A,B,B,B,-,B,A,A,B,A,B,B,B,B,B,-,A,B,B,A,B,-,B,A,A,A,A,A,B,A,B,B,B,B,B,A,B,A,A,B,B,B,B,B,A,A,A,A,B,A,B,B,B,B,A,A,A,B,B,B,B,A,A,A,B,A,B,A,B,B,B,B,B,A,A,A,A,B,B,B,B,A,A,A,-,B,B,A,B,A,-,B,B,B,A,B,A,A,B,-,A,A,A,A,A,B,B,B,A,B,A
S8_332365,,-,B,-,A,A,A,A,A,B,A,B,A,B,A,B,B,B,A,A,B,B,B,A,B,B,A,A,B,B,A,-,B,A,B,B,A,B,A,A,B,A,B,A,B,A,B,B,A,B,A,B,A,A,B,A,B,B,A,A,-,B,B,B,B,A,A,B,A,B,B,B,B,B,-,A,B,B,A,B,-,B,A,A,A,A,A,B,A,B,B,B,B,B,A,B,A,A,B,B,B,B,B,A,A,A,A,B,A,B,B,B,-,A,A,A,B,B,B,B,A,A,A,B,A,B,A,B,B,B,B,B,A,A,A,A,B,B,B,-,A,A,A,-,B,B,A,B,A,-,B,B,B,A,B,A,A,B,A,A,A,A,A,A,B,-,B,A,B,A
S8_350095,,-,B,-,A,A,A,A,A,B,A,B,-,B,A,B,B,B,A,A,B,B,B,-,B,B,A,A,-,B,A,-,B,A,B,B,A,B,-,A,B,A,B,-,B,-,B,B,A,B,A,B,A,A,B,A,B,B,A,A,B,B,B,B,B,A,A,B,A,B,B,B,B,B,-,A,B,B,A,B,-,B,A,A,A,A,A,-,A,B,B,B,B,B,A,B,A,A,B,B,B,B,B,A,A,A,A,A,-,-,B,B,-,A,A,-,B,B,B,B,A,-,A,B,A,B,A,B,B,B,B,B,A,B,A,A,-,B,B,-,A,A,A,-,B,B,A,B,A,-,A,B,-,A,B,A,A,B,-,A,A,A,A,A,B,-,B,A,B,A
S8_353499,,-,B,-,A,-,A,A,A,B,A,B,B,B,A,B,B,B,A,A,B,B,B,-,B,B,A,A,B,B,A,-,B,-,B,B,A,B,A,A,B,A,B,A,B,A,B,B,A,B,A,B,A,A,B,A,B,B,A,A,-,B,B,B,B,A,A,B,A,B,B,B,B,B,A,A,B,B,A,B,-,B,A,A,A,A,A,B,A,B,B,B,B,B,A,B,A,A,B,B,B,B,B,A,A,A,A,A,A,B,B,B,-,A,A,A,B,B,B,B,A,A,A,B,A,B,A,B,B,B,B,B,A,B,A,A,B,B,B,B,A,A,A,-,B,B,A,B,A,-,A,B,-,A,B,A,A,B,A,A,A,A,A,A,B,-,B,A,B,A
S8_362400,,-,B,-,B,A,A,A,A,B,A,B,-,B,A,B,B,B,A,A,B,B,B,-,B,B,A,A,B,B,A,-,B,A,B,B,A,B,A,A,B,A,B,A,B,A,B,B,A,B,A,B,A,A,B,A,B,B,A,A,-,B,B,B,B,A,A,B,A,B,B,B,B,B,-,A,B,B,A,B,B,B,A,A,A,A,A,B,A,B,B,B,B,B,A,B,A,A,B,B,B,B,B,A,A,A,A,A,A,B,B,B,B,A,A,A,B,B,B,B,A,A,A,B,A,B,A,B,B,B,B,B,A,B,A,A,B,B,B,B,A,A,A,-,B,B,A,B,A,-,A,B,B,A,B,A,A,B,A,A,A,A,A,A,B,-,B,A,B,A
S8_364193,,-,B,-,B,A,A,A,A,B,A,B,-,B,A,B,B,B,A,A,B,B,B,-,B,B,A,A,B,B,A,-,B,A,B,B,A,B,A,A,B,A,B,A,B,A,B,B,A,B,A,B,A,A,B,A,B,B,A,A,-,B,B,B,B,A,A,B,A,B,B,B,B,B,-,A,B,B,A,B,-,B,A,A,A,A,A,B,A,B,B,B,B,B,A,B,A,A,B,B,B,B,B,A,A,A,A,A,A,B,B,B,B,A,A,A,B,B,B,B,A,A,A,B,A,B,A,B,B,B,B,B,A,B,A,A,B,B,B,B,A,-,A,A,B,B,A,B,A,B,A,B,B,A,B,A,A,B,A,A,A,A,A,A,B,-,B,A,B,A
S8_399906,,-,B,-,B,A,A,A,A,B,A,B,-,B,A,B,B,B,A,A,B,B,B,A,B,B,A,A,B,B,A,-,B,A,B,B,A,B,A,A,B,A,B,A,B,A,B,B,A,B,A,B,A,A,B,A,B,B,A,A,-,B,B,B,B,A,A,B,A,B,B,B,B,B,A,A,B,B,A,A,B,B,A,A,A,A,A,B,A,B,A,B,B,B,A,B,A,A,B,B,A,B,B,A,A,A,A,A,A,B,B,B,B,A,A,A,B,B,B,B,A,A,A,B,A,B,A,B,A,B,B,B,A,B,A,A,B,B,B,B,A,-,A,-,B,B,A,B,A,-,A,B,B,A,B,A,A,B,A,A,A,A,A,A,B,-,B,A,B,A
S8_410496,,-,B,-,B,A,A,A,A,B,A,B,A,B,A,A,B,B,A,A,B,B,B,-,B,B,A,A,B,B,A,-,B,A,B,B,A,B,A,A,B,A,B,A,B,A,B,B,A,B,A,B,A,A,B,A,B,B,A,A,-,B,B,-,B,A,A,B,A,B,B,B,B,B,A,A,B,B,A,A,-,B,A,A,A,A,A,B,A,B,A,B,B,B,A,B,A,A,B,B,A,B,B,A,A,A,-,A,-,B,B,B,B,A,A,A,B,B,B,B,A,A,A,B,A,B,A,B,A,B,B,B,A,B,A,A,B,B,B,-,A,-,A,-,B,B,A,B,A,-,A,B,B,A,B,A,A,B,A,A,A,A,A,A,B,-,B,A,B,A
S8_434350,,A,B,-,B,A,A,A,A,B,A,B,-,B,A,A,B,B,A,A,B,B,B,-,B,B,A,A,B,B,A,B,B,A,B,B,A,B,A,A,B,A,B,A,B,A,B,B,A,B,A,B,A,A,B,A,B,B,A,A,-,B,B,B,B,A,A,B,A,B,B,B,B,B,A,A,B,B,A,A,-,B,A,B,A,A,A,B,-,B,A,B,B,B,A,B,A,A,B,B,A,B,B,A,A,A,A,A,B,B,B,B,-,A,A,A,B,B,B,B,A,A,A,B,A,B,A,B,A,B,B,B,A,B,A,A,B,B,B,B,A,-,A,-,B,B,A,B,A,-,A,B,B,A,B,A,A,B,A,A,A,A,A,A,B,-,B,A,B,A
S8_454770,,-,B,-,B,B,A,A,A,B,A,B,-,B,A,A,B,B,A,A,B,B,B,A,B,B,A,A,B,B,A,-,B,A,B,B,A,B,A,A,B,A,B,A,B,A,B,B,A,B,A,B,A,A,B,A,B,B,A,A,-,B,B,B,B,A,A,B,A,B,B,B,B,B,A,A,B,B,A,A,B,B,A,B,A,A,A,B,A,B,A,B,B,B,A,B,A,A,B,B,A,B,B,A,A,A,-,A,-,B,B,B,-,A,A,A,B,B,B,B,A,A,A,B,A,B,A,B,A,B,B,B,A,B,A,A,B,B,B,B,A,-,A,-,B,B,A,B,A,-,A,B,B,A,B,A,A,B,A,A,A,A,A,A,B,-,B,A,B,A
S8_473898,,-,B,-,B,B,A,A,A,B,A,B,-,B,A,A,B,B,A,A,B,B,B,-,B,B,A,A,B,B,A,-,B,A,B,B,A,B,A,A,B,A,B,A,B,A,B,B,A,B,A,B,A,A,B,A,B,B,A,A,-,B,B,-,B,A,A,B,A,B,B,B,B,B,-,A,B,B,A,A,-,B,A,B,A,A,A,B,A,A,A,B,B,B,A,B,A,A,B,B,A,B,B,A,A,A,A,A,-,B,B,B,-,A,A,A,B,B,B,B,A,A,A,B,A,B,A,B,A,B,B,B,A,B,A,A,B,B,B,B,A,-,A,-,B,B,A,B,A,B,A,B,B,A,B,A,A,B,A,A,A,A,A,A,B,-,B,A,B,A
S8_476436,,-,B,-,B,B,A,A,A,B,A,B,-,B,A,A,B,B,A,A,B,B,B,A,B,B,A,A,B,B,A,-,B,A,B,B,A,B,A,A,B,A,B,A,B,A,B,B,A,B,A,-,A,A,B,A,B,B,A,A,-,B,B,B,B,A,A,B,A,B,B,B,B,B,A,A,B,B,A,A,B,B,A,B,A,A,A,B,A,A,A,B,B,B,A,B,A,A,B,B,A,B,B,A,A,A,A,A,-,B,B,B,B,A,A,A,B,B,B,B,A,A,A,B,A,B,A,B,A,B,B,B,A,B,A,A,B,B,B,B,A,-,A,-,B,B,A,B,A,-,A,B,B,A,B,A,A,B,A,A,A,A,A,A,B,-,B,A,B,A
S8_482936,,-,B,-,B,B,A,A,A,B,A,B,B,B,A,A,B,B,A,A,B,B,B,A,B,B,A,A,-,B,A,-,B,A,B,B,A,B,A,A,B,A,A,A,B,A,B,B,A,B,A,-,A,A,B,A,B,B,A,A,-,B,B,B,B,A,A,B,A,B,B,B,B,B,-,A,B,B,A,A,-,B,A,B,A,A,A,B,A,A,A,B,B,B,A,B,A,A,B,B,A,B,B,A,A,A,A,A,-,B,B,B,-,A,A,A,B,B,B,B,A,A,A,B,A,B,A,B,A,B,B,B,A,B,A,A,-,B,B,B,A,-,A,-,B,B,A,B,A,-,A,B,B,A,B,A,A,B,A,A,A,A,A,A,B,-,B,A,B,A
S8_495983,,-,B,-,B,B,A,A,A,B,-,B,-,B,-,-,B,B,A,A,B,B,B,-,B,B,A,A,-,B,A,-,B,A,B,B,A,B,A,A,B,A,A,A,B,A,B,B,A,B,-,-,A,A,B,A,B,B,A,A,B,B,B,B,B,A,A,B,A,B,B,B,B,B,-,A,B,B,A,A,-,B,A,B,A,A,A,B,A,A,A,B,B,B,A,B,A,A,B,B,A,B,B,A,-,A,A,A,B,B,B,B,-,A,A,A,B,B,B,B,A,A,A,B,A,B,A,B,A,B,B,B,A,B,A,A,-,B,B,-,-,A,A,-,B,B,A,B,A,-,A,B,B,A,B,A,A,B,-,A,A,A,A,A,B,-,B,A,B,A
S8_507286,,-,B,-,B,B,A,A,A,B,A,B,-,B,A,A,B,B,A,A,B,B,B,-,B,B,A,A,B,B,A,-,B,A,B,B,A,B,A,A,B,A,A,A,B,A,B,B,A,B,A,-,A,A,B,A,B,B,A,A,-,B,B,B,B,A,A,B,A,B,B,B,B,B,-,A,B,B,A,A,-,B,A,B,A,A,A,B,A,A,A,B,B,B,A,B,A,A,B,B,A,B,B,A,A,A,A,A,-,B,B,B,-,A,A,A,B,B,B,B,A,A,A,B,A,B,A,B,A,B,B,B,A,B,A,A,B,B,B,B,A,-,A,-,B,B,A,B,A,-,A,B,B,A,B,A,A,B,A,A,A,A,A,A,B,-,B,A,B,A
S8_517875,,-,B,-,B,B,A,A,A,-,A,B,-,B,A,A,B,B,A,A,B,B,B,-,B,B,A,A,-,B,A,B,B,A,B,B,A,B,A,A,B,A,A,A,B,-,B,B,A,B,A,-,A,A,B,A,B,B,A,A,-,B,B,-,B,A,A,B,A,B,B,B,B,B,-,A,B,B,A,A,-,B,A,B,A,A,A,B,A,A,A,B,B,B,A,B,A,A,B,B,A,B,B,A,A,A,A,A,-,B,A,B,-,A,A,A,B,B,B,B,A,A,A,B,A,B,B,B,A,B,B,B,A,B,A,A,B,B,B,B,A,-,A,-,B,B,A,B,A,B,A,B,B,A,B,A,A,B,A,A,A,A,A,A,B,-,B,A,B,-
S8_530806,,-,B,-,B,B,A,A,A,B,A,B,-,B,A,A,B,B,A,A,B,B,B,-,B,B,A,A,B,B,A,-,B,A,B,B,A,B,A,A,B,A,A,A,B,A,B,B,A,B,A,-,A,A,B,A,B,B,A,A,-,B,B,B,B,A,A,B,A,B,B,B,B,B,-,A,B,B,A,A,B,B,A,B,A,A,A,B,A,A,A,B,B,B,A,B,A,A,B,B,A,B,B,A,A,A,A,A,B,B,A,B,-,A,A,A,B,B,B,B,A,A,A,B,A,B,B,B,A,B,B,B,A,B,A,A,B,B,B,B,A,-,A,-,B,-,A,B,A,-,A,B,B,A,B,A,A,B,A,A,A,A,A,A,B,-,B,A,B,A
S8_547956,,-,B,-,B,B,A,A,A,B,A,B,-,B,A,A,B,B,A,A,B,B,B,-,B,B,A,A,B,B,A,-,B,A,B,B,A,B,A,A,B,A,A,A,B,A,B,B,A,B,A,-,A,A,B,A,B,B,A,A,-,B,B,B,B,A,A,B,A,B,B,B,B,B,-,A,B,B,A,A,B,B,A,B,A,A,A,B,A,A,A,B,B,B,A,B,A,A,B,B,A,B,B,A,A,A,A,A,-,B,A,B,-,A,A,A,B,B,B,B,A,A,A,B,A,B,B,B,A,B,B,B,A,B,A,A,B,A,B,B,A,-,A,-,B,B,A,B,A,-,A,B,B,A,B,A,A,B,A,A,A,A,A,A,B,-,B,A,B,A
S8_552099,,-,B,-,B,B,A,A,A,B,A,B,-,B,A,A,B,B,A,A,B,B,B,A,B,B,A,A,B,B,A,-,B,A,B,B,A,B,A,A,B,A,A,A,B,A,B,B,A,B,A,-,A,A,B,A,B,B,A,A,-,B,B,B,B,A,A,B,A,B,B,B,B,B,A,A,B,B,A,A,B,B,A,B,A,A,A,B,A,A,A,B,B,B,A,B,A,A,B,B,A,B,B,A,A,A,A,A,-,B,A,B,-,A,A,A,B,B,B,B,A,A,A,B,A,B,B,B,A,B,B,B,A,B,A,A,B,A,B,B,A,-,A,-,B,B,A,B,A,-,A,B,B,A,B,A,A,B,A,A,A,A,A,A,B,-,B,A,B,A
S8_554854,,-,B,-,B,B,A,A,A,B,A,B,-,B,A,-,B,B,A,A,B,B,B,-,B,B,A,A,-,B,A,-,B,A,B,B,A,B,A,A,B,A,A,A,B,-,B,B,A,B,A,-,A,A,B,A,B,B,A,A,-,B,B,-,B,A,A,B,A,B,B,B,B,B,-,A,B,B,A,A,-,B,A,B,A,A,A,B,A,A,A,B,B,B,A,B,A,A,B,B,A,B,B,A,A,A,A,A,-,B,A,B,-,A,A,A,B,B,B,B,A,A,A,B,A,B,B,B,A,B,B,B,A,B,A,A,B,A,B,-,A,-,A,-,B,B,A,B,A,-,A,B,B,A,B,A,A,B,A,A,A,A,A,A,B,-,B,A,B,A
S8_557429,,-,B,-,B,B,A,A,A,B,A,B,-,B,A,A,B,B,A,A,B,B,B,-,B,B,A,A,-,B,A,-,B,-,B,B,A,B,A,A,B,A,A,A,B,-,B,B,A,B,A,-,A,A,B,A,B,B,A,A,-,B,B,-,B,A,A,B,A,B,B,B,B,B,-,A,B,B,A,A,-,B,A,B,A,A,A,B,A,A,A,-,B,B,A,B,A,A,B,B,A,B,B,A,A,A,A,A,B,B,A,B,-,A,A,A,B,B,B,B,-,A,A,B,A,B,B,B,A,-,B,B,A,B,-,A,-,A,B,-,A,-,A,-,-,B,A,B,A,-,A,B,B,A,B,-,A,B,-,A,A,A,A,A,B,-,B,A,B,A
S8_576051,,-,B,-,B,B,A,A,A,B,A,B,B,B,A,A,B,B,A,A,B,B,B,-,B,B,A,A,-,B,A,-,B,A,B,B,A,-,A,A,B,A,A,A,B,A,B,B,A,B,A,-,A,A,B,A,B,B,A,A,-,B,B,B,B,A,A,B,A,B,B,B,B,B,-,A,B,B,A,A,B,B,A,B,A,A,A,B,A,A,A,B,B,B,A,B,A,A,B,B,A,B,B,A,A,A,A,A,-,B,A,B,-,A,A,A,B,B,B,B,A,A,A,B,A,B,B,B,-,B,B,B,A,B,A,A,B,A,B,-,A,A,A,-,B,-,A,B,A,-,A,B,B,A,B,A,A,B,A,A,B,A,A,A,-,-,B,A,B,-
S8_577144,,-,B,-,B,B,A,A,A,B,A,B,-,B,A,A,B,B,A,A,B,B,B,A,B,B,A,A,B,B,A,-,B,A,B,B,A,B,A,A,B,A,A,A,B,A,B,B,A,B,A,-,A,A,B,A,B,B,A,A,-,B,B,B,B,A,A,B,A,B,B,B,B,B,A,A,B,B,A,A,-,B,A,B,A,A,A,B,A,A,A,B,B,B,A,B,A,A,B,B,A,B,B,A,A,A,A,A,-,B,A,B,B,A,A,A,B,B,B,B,A,A,A,B,A,B,B,B,A,B,B,B,A,B,A,A,B,A,B,-,A,-,A,-,B,-,A,B,A,-,A,B,B,A,B,A,A,B,A,A,B,A,A,A,B,-,B,A,B,A
S8_592348,,-,B,-,B,B,A,A,A,B,A,B,-,B,A,A,B,B,A,A,B,B,B,A,B,B,A,A,B,B,A,B,B,A,B,B,A,B,A,A,B,A,A,A,B,A,B,B,A,B,A,B,A,A,B,A,B,B,A,A,-,B,B,B,B,A,A,B,A,B,B,B,B,B,-,A,B,B,A,A,-,B,A,B,A,A,A,B,A,A,A,B,B,B,A,B,A,A,B,B,A,B,B,A,A,A,A,A,-,B,A,B,-,A,A,A,B,B,B,B,A,A,A,B,A,B,B,B,A,B,B,B,A,B,A,A,B,A,B,B,A,-,A,-,B,B,A,B,A,B,A,B,B,A,B,A,A,B,A,A,B,A,A,A,B,-,B,A,B,A
S8_614909,,-,B,-,B,B,A,A,A,B,A,B,A,B,A,A,B,B,A,A,B,B,B,-,B,B,A,A,B,B,A,-,B,A,B,B,A,B,A,A,B,A,A,A,B,-,B,B,A,B,A,-,A,A,B,A,B,B,A,A,-,B,B,B,B,A,A,B,A,B,B,B,B,B,-,A,B,B,A,A,-,B,A,B,A,A,A,B,A,A,A,B,B,B,A,B,A,A,B,B,A,B,B,A,A,A,A,A,-,B,A,B,-,A,A,A,B,B,B,B,A,A,A,B,A,B,B,B,A,B,B,B,A,B,A,A,B,B,B,-,A,-,A,-,B,B,A,B,A,-,A,B,B,A,B,A,A,B,A,A,B,A,A,A,B,-,B,A,B,A
S8_620367,,-,B,-,B,B,A,A,A,B,A,B,A,B,A,A,B,B,A,A,B,B,B,-,B,B,A,A,B,B,A,-,B,A,B,B,A,B,A,A,B,A,A,A,B,A,B,B,A,B,A,-,A,A,B,A,B,B,A,A,-,B,B,B,B,A,A,B,A,B,B,B,B,B,A,A,B,B,A,A,B,B,A,B,A,A,A,B,A,A,A,B,B,B,A,B,A,A,B,B,A,B,B,A,A,A,A,A,-,B,A,B,B,A,A,A,B,B,B,B,A,A,A,B,A,B,B,B,A,B,B,B,A,B,A,A,B,B,B,B,A,-,A,-,B,B,A,B,A,-,A,B,-,A,B,A,A,B,A,A,B,A,A,A,B,-,B,A,B,A
S8_633096,,-,B,B,B,B,A,-,A,B,-,B,A,B,A,A,B,B,A,A,B,B,B,-,-,B,A,A,B,B,A,B,B,-,B,B,A,B,A,A,-,-,A,A,B,-,B,B,A,B,A,-,A,A,B,A,B,B,A,A,-,B,B,-,B,A,A,B,A,B,B,B,B,B,A,-,B,B,A,A,-,-,A,B,A,A,A,B,A,A,A,B,-,B,A,B,A,-,B,B,-,B,B,A,A,A,-,A,-,B,A,B,-,A,A,A,B,B,B,B,A,A,A,B,A,B,B,B,A,B,B,B,A,B,A,A,-,B,B,-,-,-,A,-,B,B,A,B,A,-,A,B,-,A,B,A,-,B,A,A,B,A,A,A,B,-,B,A,B,-
S8_636345,,-,B,-,B,B,A,A,A,B,A,B,A,B,A,A,B,B,A,A,B,B,B,A,B,B,A,A,B,B,A,-,B,A,B,B,A,B,A,A,B,A,A,A,B,A,B,B,A,B,A,-,A,A,B,A,B,B,A,A,-,B,B,B,B,A,A,B,A,B,B,B,B,B,A,A,B,B,A,A,B,B,A,B,A,A,A,B,A,A,A,B,B,B,A,B,A,A,B,B,A,B,B,A,A,A,A,A,-,B,A,B,-,A,A,A,B,B,B,B,A,A,A,B,A,B,B,B,A,B,B,B,A,B,A,A,B,B,B,B,A,-,A,-,B,B,A,B,A,-,A,B,B,A,B,A,A,B,A,A,B,A,A,A,B,-,B,A,B,A
S8_657107,,A,B,-,B,B,A,A,A,B,A,B,A,B,A,A,B,B,A,A,B,B,B,-,B,B,A,A,B,A,A,B,B,A,B,B,A,B,A,A,B,A,A,A,B,A,B,B,A,B,A,-,A,A,B,A,B,B,A,A,-,B,B,B,B,A,A,B,A,B,B,B,B,B,-,A,B,B,A,A,B,B,A,B,A,A,A,B,A,A,A,B,B,B,A,B,A,A,B,B,A,B,B,A,A,A,A,A,-,B,A,B,-,A,A,A,B,B,B,B,A,A,A,B,A,B,B,B,A,B,B,B,A,B,A,A,B,B,B,B,A,-,A,A,B,B,A,B,A,-,A,B,B,A,B,A,A,B,A,A,B,A,A,A,B,-,B,A,B,A
S8_665235,,A,B,-,B,B,A,A,A,B,A,B,A,B,A,A,B,B,A,A,B,B,B,A,B,B,A,A,B,A,A,B,B,A,B,B,A,B,A,A,B,A,A,A,B,A,B,B,A,B,A,-,A,A,B,A,B,B,A,A,-,B,B,B,B,A,A,B,A,B,B,B,B,B,A,A,B,B,A,A,B,B,A,B,A,A,A,B,A,A,A,B,B,B,A,B,A,A,B,B,A,B,B,A,A,A,A,A,-,B,A,B,-,A,A,A,B,B,B,B,A,A,A,B,A,B,B,B,A,B,B,B,A,B,A,A,B,B,B,B,A,-,A,A,B,B,A,B,A,B,A,B,B,A,B,A,A,B,A,A,B,A,A,A,B,-,B,A,B,A
S8_679385,,-,A,-,B,B,A,A,A,B,A,B,A,B,A,A,B,B,A,A,B,B,B,A,B,B,A,A,B,A,A,B,B,A,B,B,A,B,A,A,B,A,A,A,B,A,B,B,A,B,A,-,A,A,B,A,B,B,A,A,-,B,B,B,B,A,A,B,A,B,B,B,B,B,A,A,B,B,A,A,-,B,A,B,A,A,A,B,A,A,A,B,B,B,A,B,A,A,B,B,A,B,B,A,A,A,A,A,-,B,A,B,-,A,A,A,B,B,B,B,A,A,A,B,A,B,B,B,A,B,B,B,A,B,A,A,B,B,B,B,A,-,A,-,B,B,A,B,A,-,A,B,B,A,B,A,A,B,A,A,B,A,A,A,B,-,B,A,B,A
S8_732483,,-,A,-,B,B,A,A,A,B,A,B,A,B,A,A,B,B,A,A,B,B,B,-,B,B,A,A,B,A,A,B,B,A,B,B,A,B,A,A,B,A,A,A,B,A,B,B,A,B,A,-,A,A,B,A,B,B,A,A,B,B,B,-,B,A,A,B,A,B,B,B,B,B,-,A,B,B,A,A,-,B,A,B,A,A,A,B,A,A,A,B,B,B,A,B,A,A,B,A,A,B,B,A,A,A,A,A,-,B,A,A,B,A,A,A,B,B,B,B,-,A,A,B,A,B,B,B,A,B,B,B,A,B,A,A,-,B,B,-,A,-,A,-,B,-,A,B,A,-,A,B,B,A,B,A,A,B,-,A,B,A,A,A,B,-,B,A,B,A
S8_783957,,-,A,-,B,B,A,A,A,B,A,B,A,B,A,A,B,B,A,A,B,B,B,A,B,B,A,A,B,A,A,B,B,A,B,B,A,B,A,A,B,A,A,A,B,A,B,B,A,B,A,-,A,A,B,A,B,B,A,A,B,B,B,-,B,A,A,B,A,B,B,B,B,A,A,A,B,B,A,A,-,B,A,B,A,A,A,B,A,A,A,B,B,B,A,B,A,A,B,A,A,B,B,A,A,A,A,A,-,B,A,A,-,A,A,A,B,B,B,B,A,A,A,B,A,B,B,B,A,B,B,B,A,B,A,A,B,B,B,B,A,-,A,-,B,-,A,B,A,-,A,B,B,A,B,A,A,B,A,A,B,A,A,A,B,-,B,A,B,A
S8_834543,,-,A,-,B,B,A,A,A,B,A,B,-,B,A,A,B,B,A,A,A,B,B,-,B,B,A,B,B,A,A,B,A,A,B,B,A,B,A,A,B,A,A,A,A,A,B,B,A,B,A,-,A,A,B,A,B,B,-,A,B,B,B,B,B,A,A,B,A,B,B,B,B,A,A,A,B,B,A,A,-,B,A,B,A,A,A,B,A,A,A,B,B,B,A,B,A,A,B,A,A,B,B,A,A,A,A,A,-,B,A,A,-,A,A,A,B,B,B,B,A,A,A,B,A,B,B,B,A,B,B,B,A,B,A,A,-,B,B,B,A,-,A,A,B,B,A,B,A,-,A,B,B,A,B,A,-,B,-,A,B,A,A,A,B,-,B,A,B,A
S8_843148,,-,A,-,B,B,A,A,A,B,A,B,-,B,A,A,B,B,A,A,A,B,B,A,B,B,A,B,B,A,A,B,A,A,B,B,A,B,A,A,B,A,A,A,A,-,B,B,A,B,A,-,A,A,B,A,B,B,A,A,B,B,B,B,B,A,A,B,A,B,B,B,B,A,A,A,B,B,A,A,-,B,A,B,A,A,A,B,A,A,A,B,B,B,A,B,A,A,B,A,A,B,B,A,A,A,A,A,-,B,A,A,B,A,A,A,B,B,B,B,A,A,A,B,A,B,B,B,A,B,B,B,A,B,A,A,B,B,B,B,A,-,A,-,B,B,A,B,A,-,A,B,B,A,B,A,B,B,A,A,B,A,A,A,B,B,B,A,B,A
S8_846626,,-,A,-,B,B,A,A,A,B,A,B,-,B,A,A,B,B,A,A,A,B,B,A,B,B,A,B,B,A,A,B,A,A,B,B,A,B,A,A,B,A,A,A,A,A,B,B,A,B,A,-,A,A,B,A,B,B,-,A,B,B,B,B,B,A,A,B,A,B,B,B,B,A,A,A,B,B,A,A,B,B,A,B,A,A,A,B,A,A,A,B,B,B,A,B,A,A,B,A,A,B,B,A,A,A,A,A,-,B,A,A,-,A,A,A,B,B,B,B,A,A,A,B,A,B,B,B,A,B,B,B,A,B,A,A,B,B,B,-,A,-,A,-,B,B,A,B,A,-,A,B,B,A,B,A,-,B,A,A,B,A,A,A,B,-,B,A,B,A
S8_851167,,-,A,-,B,B,A,A,A,B,A,B,-,B,A,A,B,B,A,A,A,B,B,A,B,B,A,B,B,A,A,B,A,A,B,B,A,B,A,A,B,A,A,A,A,A,B,B,A,B,A,-,A,A,B,A,B,B,B,A,B,B,B,B,B,A,A,B,A,B,B,B,B,A,-,A,B,B,A,A,-,B,A,B,A,A,A,B,A,A,A,B,B,B,A,B,A,A,B,A,A,B,B,A,A,A,A,A,-,B,A,A,B,A,A,A,B,B,B,B,A,A,A,B,A,B,B,B,A,B,B,B,A,B,A,A,B,B,B,B,A,-,A,A,B,B,A,B,A,-,A,B,B,A,B,A,B,B,A,A,B,A,A,A,B,-,B,A,B,A
S8_867044,,-,A,-,B,B,A,A,A,B,A,B,B,B,A,A,B,B,A,A,A,B,B,-,B,B,A,B,B,A,A,B,A,A,B,B,A,B,A,A,B,A,A,A,A,A,B,B,A,B,A,-,A,A,B,A,B,B,B,A,B,B,B,B,B,A,A,B,A,B,B,B,B,A,A,A,B,B,A,A,-,B,A,B,A,A,A,B,A,A,A,B,B,B,A,B,A,A,B,A,A,B,B,A,A,A,A,A,-,B,A,A,-,A,A,A,B,B,B,B,A,A,A,B,A,B,B,B,A,B,B,B,A,B,A,A,B,B,B,B,A,-,A,-,B,B,A,B,A,-,A,B,B,A,B,A,B,B,A,A,B,A,A,A,B,B,B,A,B,A
S8_917817,,-,A,-,B,B,A,A,A,B,A,B,-,B,A,A,B,B,A,A,A,B,B,A,B,B,A,B,B,B,A,B,A,A,B,B,A,B,A,A,B,A,A,A,A,A,B,B,A,B,A,-,A,A,B,A,B,B,B,A,B,B,B,B,B,A,A,B,A,B,B,B,B,A,-,A,B,B,A,A,-,B,A,B,A,A,A,B,A,A,A,B,B,B,A,B,A,A,B,A,A,B,B,A,A,A,A,A,-,B,A,A,-,A,A,A,B,B,A,B,A,A,A,B,A,B,B,B,A,B,B,B,A,B,A,B,B,B,B,-,A,-,A,-,B,B,A,B,A,-,B,B,B,A,B,A,B,A,A,A,B,A,A,A,B,-,B,A,B,A
S8_930575,,-,A,B,B,B,A,A,A,B,A,B,-,B,A,-,B,B,A,A,A,B,B,-,B,B,A,B,B,B,A,B,A,A,B,B,A,B,A,A,B,A,A,A,A,A,B,B,A,B,A,-,A,A,B,A,B,B,B,A,B,B,B,B,B,A,A,B,A,B,B,B,B,A,-,A,B,B,A,A,B,B,A,B,A,A,A,B,A,A,A,B,B,B,A,B,A,A,B,A,A,B,B,A,A,A,A,A,-,B,A,A,-,A,A,A,B,B,A,B,A,A,A,B,A,B,B,B,A,B,B,B,A,B,A,B,B,B,B,B,A,-,A,-,B,B,A,B,A,B,B,B,B,A,B,A,B,A,A,A,B,A,A,A,B,-,B,A,B,A
S8_934073,,-,A,-,B,B,A,A,A,B,A,B,-,B,A,A,B,B,A,A,A,B,B,-,B,B,A,B,B,B,A,B,A,A,B,B,A,B,A,A,B,A,A,A,A,A,B,B,A,B,A,-,A,A,B,A,B,B,B,A,B,B,B,B,B,A,A,B,A,B,B,B,B,A,A,A,B,B,A,A,B,B,A,B,A,A,A,B,A,A,A,B,B,B,A,B,A,A,B,A,A,B,B,A,A,A,A,A,-,B,A,A,-,A,A,A,B,B,A,B,A,A,A,B,A,B,B,B,A,B,B,B,A,B,A,B,-,B,B,B,A,-,A,-,B,B,A,B,A,-,B,B,B,A,B,A,B,A,A,A,B,A,A,A,B,-,B,A,B,A
S8_935082,,-,A,-,B,B,A,A,A,B,A,B,-,B,A,A,B,B,A,A,A,B,B,-,B,B,A,B,B,B,A,B,A,A,B,B,A,B,A,A,B,A,A,A,A,A,B,B,A,B,A,-,A,A,B,A,B,B,B,A,B,B,B,B,B,A,A,B,A,B,B,B,B,A,-,A,B,B,A,A,B,B,A,B,A,A,A,B,A,A,A,B,B,B,A,B,A,A,B,A,A,B,B,A,A,A,A,A,-,B,A,A,B,A,A,A,B,B,A,B,A,A,A,B,A,B,B,B,A,B,B,B,A,B,A,B,B,B,B,B,A,-,A,-,B,B,A,B,A,B,B,B,B,A,B,A,B,A,A,A,B,A,A,A,B,-,B,A,B,A
S8_943425,,-,A,-,B,B,A,A,A,B,-,B,-,B,A,-,B,B,A,-,A,B,B,-,B,B,A,B,-,B,A,B,-,A,B,B,A,B,A,A,B,A,A,A,A,A,B,B,A,B,A,B,A,A,B,A,B,B,B,A,B,-,B,-,B,-,A,B,A,B,B,B,B,A,-,A,B,B,A,A,-,B,A,B,A,-,A,B,A,A,A,B,B,B,A,B,A,A,B,A,A,B,B,A,A,A,-,A,A,B,A,A,-,A,A,A,-,B,A,B,-,A,-,B,A,B,B,B,A,-,B,B,A,B,A,B,B,B,B,B,A,-,A,-,B,B,A,B,A,-,B,B,B,A,B,A,B,A,A,A,B,A,A,A,B,-,B,A,B,A
S8_985142,,-,A,-,B,B,A,A,A,B,A,B,-,B,A,A,B,B,A,A,A,B,B,-,B,B,A,B,B,B,A,B,A,A,B,B,A,B,A,A,B,A,A,A,A,A,B,B,A,B,A,-,A,A,B,A,B,B,B,A,B,B,B,B,B,A,A,B,A,B,B,B,B,A,A,A,B,B,A,A,B,B,A,B,A,A,A,B,A,A,A,B,B,B,A,B,A,A,B,A,A,B,B,A,A,A,A,A,-,B,A,A,-,A,A,A,B,B,A,B,A,A,A,B,A,B,B,B,A,B,A,B,A,B,A,B,B,B,B,B,A,-,A,-,B,B,A,B,A,-,B,B,B,A,B,A,B,A,A,A,B,A,A,A,B,-,B,A,B,A
S8_987523,,-,A,-,B,-,A,-,A,B,A,B,B,B,A,-,B,B,A,A,A,B,B,-,B,B,A,B,B,B,A,B,A,-,B,B,A,B,-,A,B,A,A,A,A,-,B,B,A,B,A,-,A,A,B,A,B,B,B,A,B,-,B,-,B,A,A,B,A,B,B,B,-,A,-,A,B,B,A,A,-,-,A,B,A,A,A,-,A,A,A,-,B,B,A,B,A,A,B,A,A,B,B,A,A,A,A,A,A,B,A,A,-,-,A,A,B,B,A,B,A,A,A,B,A,B,B,B,A,B,A,B,A,B,A,B,-,B,B,-,A,-,A,-,B,B,A,B,A,-,B,B,-,A,B,-,B,A,A,A,B,A,A,A,-,-,B,A,B,A
S8_1005154,,-,A,-,B,-,A,A,A,B,A,B,-,B,A,A,B,B,A,A,A,B,B,-,B,B,A,B,-,B,A,B,-,A,B,B,-,B,-,A,B,A,A,A,A,-,B,B,A,B,-,A,A,A,B,A,B,B,B,A,B,B,B,B,B,A,A,B,A,B,B,B,B,A,-,A,B,B,A,A,-,B,A,B,A,A,A,B,A,A,A,B,B,-,A,B,A,-,B,A,A,B,B,A,A,A,A,A,A,B,A,A,-,A,A,A,A,B,A,B,-,A,A,B,A,B,B,B,A,-,A,B,A,B,-,B,-,B,B,-,A,-,A,-,B,B,A,B,A,-,B,B,-,A,B,A,B,A,-,-,B,A,A,A,B,-,B,A,B,A
S8_1007623,,-,A,-,B,B,A,A,A,B,A,B,B,B,A,A,B,B,A,A,A,B,B,A,B,B,A,B,B,B,A,B,A,A,B,B,A,B,A,A,B,A,A,A,A,A,B,B,A,B,A,-,A,A,B,A,B,B,B,A,B,B,B,B,B,A,A,B,A,B,B,B,B,A,A,A,B,B,A,A,B,B,A,B,A,A,A,B,A,A,A,B,B,B,A,B,A,A,B,A,A,B,B,A,A,A,A,A,-,B,A,A,B,A,A,A,A,B,A,B,A,A,A,B,A,B,B,B,A,B,A,B,A,B,A,B,B,B,B,-,A,-,A,-,B,B,A,B,A,-,B,B,B,A,B,A,B,A,A,A,B,A,A,A,B,-,B,A,B,A
S8_1028839,,-,A,-,B,B,A,A,A,B,A,B,B,B,A,A,B,-,A,A,A,B,-,-,B,B,A,B,B,B,A,B,A,A,B,B,A,-,A,A,B,A,A,A,A,A,-,B,A,B,-,-,B,A,B,A,B,B,B,A,B,B,B,-,B,A,A,B,A,B,B,B,-,A,-,A,B,B,A,A,-,B,A,B,A,A,A,-,A,A,A,B,B,-,A,-,A,A,B,A,A,B,B,A,A,A,A,A,A,-,A,A,-,A,A,A,A,B,A,B,A,A,A,B,A,B,B,B,A,-,A,B,A,B,A,B,B,B,B,-,A,A,A,-,B,-,A,B,A,-,B,B,-,A,B,A,B,A,A,A,B,A,A,A,B,-,B,A,B,A
S8_1050424,,-,A,-,B,B,A,-,A,B,A,B,B,B,A,-,B,-,A,A,A,B,B,-,A,B,A,B,B,-,A,B,A,-,B,B,A,-,-,A,B,A,A,A,A,A,B,B,A,B,A,B,B,A,B,A,B,B,B,A,B,-,B,B,B,A,A,-,A,B,B,B,B,A,-,A,B,B,A,A,-,B,-,B,A,A,A,B,A,A,A,-,B,B,A,B,A,-,B,A,A,B,B,A,A,A,A,A,-,-,A,A,-,A,A,A,A,B,A,B,A,A,A,-,A,B,B,B,A,B,A,B,A,B,A,B,-,B,B,-,A,-,A,-,B,B,A,B,A,-,B,B,B,A,B,A,B,A,-,A,B,A,A,-,-,-,B,A,B,A
S8_1058435,,-,A,-,B,-,A,-,A,B,A,B,B,B,-,-,B,B,A,A,A,B,B,-,A,B,A,B,-,B,A,-,A,A,B,B,A,B,A,A,B,A,A,A,A,A,B,B,A,B,A,-,B,A,B,A,B,B,B,A,B,B,B,-,B,A,A,B,A,B,B,B,B,A,-,A,B,B,A,A,-,B,A,B,A,A,A,-,A,A,A,-,B,B,A,B,A,A,B,A,A,B,B,A,A,A,-,A,A,B,A,A,-,A,A,A,-,B,A,B,A,A,A,B,A,B,B,B,A,B,A,B,A,B,A,B,B,B,B,-,A,-,A,-,B,B,A,B,A,-,B,B,B,A,B,A,B,A,A,A,B,A,A,A,A,-,B,A,B,-
S8_1065712,,-,A,-,-,-,A,-,A,B,A,B,-,B,A,-,B,B,A,A,A,B,B,-,A,B,A,B,B,B,A,B,A,-,B,B,A,B,-,A,B,A,A,A,A,-,B,B,A,B,A,-,B,A,B,A,B,B,B,A,B,B,B,-,B,A,A,-,A,B,B,B,-,A,-,A,B,B,A,A,-,B,A,B,A,A,A,B,A,-,A,-,B,B,A,B,A,A,-,A,-,B,B,A,-,A,A,A,-,B,A,A,-,A,A,A,A,B,A,B,A,A,A,B,A,B,B,B,A,-,A,B,A,B,A,B,-,B,B,-,A,B,A,-,B,-,A,B,A,-,B,B,-,A,B,A,B,A,A,A,B,A,A,A,A,-,B,A,B,A
S8_1078237,,-,A,-,B,-,A,-,A,B,A,B,B,B,-,-,B,B,A,A,A,B,B,-,A,B,A,B,B,B,A,B,A,A,B,B,-,B,A,A,B,-,A,A,A,-,B,B,A,B,-,A,B,A,B,A,B,B,B,A,B,B,B,-,B,A,A,B,-,B,B,B,B,A,A,A,B,B,A,A,-,B,A,B,-,A,A,B,A,A,A,B,B,B,A,B,A,A,B,A,A,B,-,A,A,A,A,A,-,B,A,A,-,A,A,A,A,B,A,B,A,A,A,-,A,B,B,B,A,-,-,B,A,B,A,B,-,B,B,B,A,-,A,-,B,B,A,B,A,-,B,B,B,A,B,A,B,A,-,A,B,A,A,A,A,-,B,A,B,-
S8_1124395,,-,A,-,B,B,A,A,A,-,A,B,B,B,A,A,B,B,A,A,A,B,B,A,A,B,A,B,B,B,A,B,A,A,B,B,A,B,A,A,B,-,-,A,A,-,B,B,A,B,A,-,B,A,B,A,B,B,B,A,B,B,B,-,B,A,A,B,A,B,B,B,B,A,-,A,B,B,A,A,B,B,A,B,A,A,A,B,A,A,A,B,B,B,A,B,A,A,B,A,A,B,B,A,A,A,A,A,-,B,A,A,-,A,A,A,A,B,A,B,A,A,A,B,A,B,B,B,A,B,A,B,A,B,A,-,-,B,B,-,A,-,A,-,B,B,A,B,A,-,B,B,B,A,B,A,B,A,A,A,B,A,-,A,A,-,B,A,B,-
S8_1277344,,-,A,-,B,B,A,A,A,B,A,B,-,B,A,A,B,B,A,A,A,B,B,-,A,B,A,B,B,B,A,B,B,A,B,B,A,B,A,A,B,A,A,A,A,A,B,B,A,B,A,A,B,A,B,A,B,B,B,A,B,B,A,-,B,A,A,B,A,B,B,B,B,A,-,A,B,B,A,A,-,B,A,B,A,A,A,B,A,A,A,B,B,B,A,B,A,A,B,A,A,B,B,A,A,B,A,A,A,B,A,A,B,A,A,A,A,B,A,B,A,A,A,B,A,B,B,B,A,B,A,B,A,B,A,B,B,B,B,-,B,-,A,-,B,B,A,B,A,-,B,B,B,A,B,A,B,A,A,A,B,A,A,A,A,-,B,A,B,A
S8_1368891,,-,A,-,B,B,A,A,B,B,A,B,-,B,A,A,B,B,A,A,A,B,B,-,A,B,A,B,B,B,A,B,B,A,B,B,A,B,A,A,B,A,A,A,A,A,B,B,A,B,A,A,B,A,B,A,B,B,B,A,B,B,A,B,B,A,A,B,A,B,B,B,B,A,A,A,B,B,A,A,B,B,A,B,A,A,A,B,A,A,A,B,B,A,A,B,A,A,B,B,A,B,B,A,A,B,A,A,A,B,A,A,-,A,A,A,A,B,A,B,A,A,A,B,A,B,B,B,A,B,A,B,A,B,A,B,B,B,B,B,B,-,A,-,B,B,A,B,A,-,B,B,A,A,-,A,B,A,A,A,B,A,A,A,A,-,B,B,B,A
S8_1373651,,-,A,-,B,B,A,A,B,B,A,B,B,B,A,-,B,B,A,A,A,B,B,-,A,B,A,B,B,B,A,-,B,A,B,B,A,B,A,A,B,A,A,A,A,A,B,B,A,B,A,A,B,A,B,A,B,B,B,A,B,B,A,B,B,A,A,B,A,B,B,B,B,A,-,A,B,B,A,A,-,B,A,B,A,A,A,B,A,A,A,-,B,A,A,B,A,A,B,B,A,B,B,A,A,B,A,A,A,B,A,A,-,A,A,A,A,B,A,B,A,A,A,B,A,B,B,B,A,B,A,B,A,B,A,-,B,B,B,B,B,-,A,-,B,B,A,B,A,-,B,B,A,A,-,A,B,A,-,A,B,A,A,A,-,-,B,B,B,A
S8_1466759,,-,A,-,B,-,A,A,B,A,A,B,A,B,A,-,B,-,A,-,A,A,B,-,A,B,A,B,B,B,A,B,-,A,B,B,A,B,-,A,-,A,A,A,A,A,B,B,A,B,A,A,B,A,B,A,B,B,B,A,B,-,A,-,B,A,A,B,A,B,B,A,B,A,-,A,B,B,A,A,-,B,A,B,A,A,A,B,A,A,A,B,B,A,A,B,B,A,B,B,A,B,A,-,A,B,A,A,A,-,A,A,-,A,A,A,A,B,A,-,-,A,A,B,A,B,B,B,A,B,A,B,B,B,A,B,-,B,B,-,B,-,A,-,B,B,A,B,A,-,B,B,A,A,B,A,B,A,A,A,B,A,A,A,B,-,B,B,B,A
S8_1468141,,-,A,-,B,B,A,A,B,A,A,B,-,B,A,A,B,B,A,A,A,A,B,-,A,B,A,B,B,B,A,B,B,A,B,B,A,B,A,A,B,A,A,A,A,A,B,B,A,B,A,A,B,A,B,A,B,B,B,A,B,B,A,B,B,A,A,B,A,B,B,A,B,A,A,A,B,B,A,A,-,B,A,B,A,A,A,B,A,A,A,B,B,A,A,B,B,A,B,B,A,B,A,A,A,B,A,A,A,B,A,A,B,A,A,A,A,B,A,B,A,A,A,B,A,B,B,B,A,B,A,B,B,B,A,B,B,B,B,B,B,-,A,-,B,B,A,B,A,-,B,B,A,A,-,A,B,A,A,A,B,A,A,A,-,-,B,B,B,A
S8_1487669,,-,A,-,B,B,A,A,B,A,A,B,A,B,A,A,B,B,-,A,A,A,B,-,A,B,A,B,B,B,A,B,B,-,B,B,A,B,A,A,B,A,A,A,A,-,B,B,A,B,A,A,B,A,B,A,B,B,B,A,B,B,A,-,B,A,A,B,A,B,B,A,B,A,-,A,B,B,A,A,-,B,A,B,A,A,A,B,A,A,A,-,B,A,A,B,B,A,B,B,A,B,A,A,A,B,A,A,A,B,A,A,-,A,A,A,A,B,A,B,A,A,A,B,A,B,B,B,A,B,A,B,B,B,A,B,B,B,B,-,B,-,A,-,B,B,A,B,A,-,B,B,A,A,-,A,B,A,A,A,B,A,A,A,A,-,B,B,B,A
S8_1498409,,A,A,-,B,B,A,A,B,A,A,B,A,B,A,A,B,B,A,A,A,A,B,A,A,B,A,B,B,B,A,B,B,A,B,B,A,B,A,A,B,A,A,A,A,A,B,B,A,B,A,A,B,A,B,A,B,B,B,A,B,B,A,B,B,A,A,B,A,B,B,A,B,A,A,A,B,B,A,A,B,B,A,B,A,A,A,B,A,A,A,B,B,A,A,B,B,A,B,B,A,B,A,A,A,B,A,A,A,B,A,A,-,A,A,A,A,B,A,B,A,A,A,B,A,B,B,B,A,B,A,B,B,B,A,B,B,B,B,B,B,-,A,-,B,B,A,B,A,-,B,B,A,A,-,A,B,A,A,A,B,A,A,A,-,-,B,B,B,A
S8_1500262,,-,A,-,B,B,A,A,B,A,A,B,A,B,A,A,B,B,A,A,A,A,B,A,A,B,A,B,B,B,A,B,B,A,B,B,A,B,A,A,B,A,A,A,A,A,B,B,A,B,A,A,B,A,B,A,B,B,B,A,B,B,A,B,B,A,A,B,A,B,B,A,B,A,-,A,B,B,A,A,-,B,A,B,A,A,A,B,A,A,A,B,B,A,A,B,B,A,B,B,A,B,A,A,A,B,A,A,A,B,A,A,B,A,A,A,A,B,A,B,A,A,A,B,A,B,B,B,A,B,A,B,B,B,A,B,B,B,B,B,B,-,A,-,B,B,A,B,A,-,B,B,A,A,-,A,B,A,A,A,B,A,A,A,-,B,B,B,B,A
S8_1565249,,-,A,-,B,A,A,A,B,A,A,B,A,B,A,A,B,B,A,A,A,A,B,-,A,B,A,B,B,B,A,B,A,A,B,B,A,B,A,A,B,A,A,A,A,A,B,B,A,B,A,A,B,A,B,A,B,A,B,A,B,B,A,B,B,A,A,B,A,B,A,A,B,A,-,A,B,B,A,A,-,B,A,B,A,A,A,B,A,A,A,B,B,A,B,B,B,A,A,B,A,B,A,A,A,B,A,A,A,B,A,A,-,A,A,A,A,B,A,B,A,A,A,B,A,B,B,B,A,B,A,B,B,B,A,B,B,B,B,B,B,-,A,-,A,B,A,B,A,-,B,B,A,A,-,A,B,A,A,A,B,A,A,A,A,-,B,B,B,A
S8_1617853,,-,B,-,B,A,A,A,B,A,A,B,A,B,A,A,B,B,A,A,A,A,B,A,A,B,A,B,B,B,A,B,A,A,B,B,A,B,A,A,B,A,A,A,A,A,B,B,A,B,A,A,B,A,B,A,B,A,B,A,B,B,A,B,B,A,A,B,A,B,A,A,B,A,A,A,B,B,A,A,B,B,A,B,A,A,A,B,A,A,A,B,B,A,B,B,B,A,A,B,A,B,A,A,A,B,A,A,A,B,A,A,-,A,B,A,A,B,A,B,A,A,A,B,A,B,B,B,A,B,A,B,B,B,A,B,B,B,B,B,B,-,A,-,A,B,A,A,A,-,B,B,A,A,-,A,B,A,A,A,B,A,A,A,-,-,B,A,B,A
S8_1638794,,-,B,-,B,A,A,A,B,A,A,B,A,B,A,A,B,B,A,A,A,A,B,A,A,B,A,B,B,B,A,B,A,A,B,B,A,B,A,A,B,A,A,A,A,A,B,B,A,B,A,A,B,A,B,A,B,A,B,A,B,B,A,B,B,A,A,B,A,B,A,A,B,A,-,A,B,B,A,A,B,B,A,B,A,A,A,B,A,A,A,B,B,A,B,B,B,A,A,B,A,B,A,A,A,B,A,A,A,B,A,A,-,A,B,A,A,B,A,B,A,A,A,B,A,B,B,B,A,B,A,B,B,B,A,B,B,B,B,-,B,-,A,-,A,B,A,A,A,-,B,B,A,A,-,A,B,A,A,A,B,A,A,A,-,-,B,A,B,A
S8_1651452,,-,B,-,B,A,A,A,B,A,A,B,A,B,A,A,B,B,A,A,A,A,B,-,A,B,A,B,-,B,A,B,A,A,B,B,A,B,A,A,B,A,A,A,A,A,B,B,A,B,A,A,B,A,B,A,B,B,B,A,B,B,A,-,-,A,A,B,A,B,A,A,B,A,-,A,B,B,A,A,-,B,A,B,A,A,A,B,A,A,A,B,B,A,B,B,B,A,A,B,A,B,A,A,A,B,A,A,A,B,A,B,-,A,B,A,A,B,A,B,A,A,A,B,A,B,B,B,A,B,A,B,B,B,A,B,B,B,B,-,B,-,A,-,A,B,A,A,A,-,B,B,A,A,-,A,B,A,A,A,B,A,A,A,A,-,B,-,B,-
S8_1671494,,-,B,B,B,A,A,A,B,A,A,B,A,B,A,A,B,B,A,A,A,A,B,A,A,B,A,B,B,B,A,B,A,-,B,B,A,B,A,A,B,A,A,A,A,A,B,B,A,B,A,A,B,A,B,A,B,B,B,A,B,B,A,B,B,A,A,B,A,B,A,A,B,A,A,A,B,B,A,A,-,B,A,B,A,A,A,B,A,A,A,B,B,A,B,B,B,A,A,B,A,B,A,A,A,B,A,A,A,B,A,B,-,A,B,A,A,B,A,B,A,A,A,B,A,B,B,B,A,B,A,B,B,B,A,B,B,B,B,B,B,-,A,-,A,B,A,A,A,-,B,B,A,A,B,A,B,A,A,A,B,A,A,A,-,-,B,A,B,A
S8_1697411,,-,B,-,B,A,A,A,B,A,A,B,A,B,A,A,B,B,A,A,A,A,B,A,A,B,A,B,B,B,A,B,A,A,B,B,A,B,A,A,B,A,A,A,A,A,B,B,A,B,A,A,B,A,B,A,B,B,B,A,B,B,A,B,B,A,A,B,A,B,A,A,B,A,-,A,B,B,A,A,-,A,A,B,A,A,A,B,A,A,A,B,B,A,B,B,B,A,A,B,A,B,A,A,A,B,A,A,A,B,A,B,B,A,B,A,A,B,A,B,A,A,A,B,A,B,B,B,A,B,A,B,B,B,A,B,B,B,B,B,B,-,A,-,A,B,A,A,A,-,B,B,A,A,-,A,B,A,A,A,B,A,A,A,A,-,B,A,B,A
S8_1702999,,-,B,-,B,A,A,A,B,A,A,B,-,B,A,A,B,B,A,A,A,A,B,-,A,B,A,B,B,B,A,B,A,A,B,B,A,B,-,A,B,A,A,A,A,A,B,B,-,B,A,A,B,A,B,A,B,B,B,A,B,B,A,-,B,A,A,-,A,B,A,A,B,A,A,A,B,B,A,A,-,A,A,B,A,A,A,B,A,A,A,-,B,A,B,B,-,A,A,B,A,B,A,A,A,B,A,A,A,-,A,B,-,A,B,A,-,B,A,B,-,A,A,B,A,B,B,B,A,B,A,B,B,B,A,B,-,B,B,-,B,-,A,-,A,B,A,A,A,-,B,B,-,A,B,A,B,A,A,A,B,A,A,A,A,-,B,A,B,A
S8_1704935,,-,B,-,B,A,A,A,B,-,-,B,-,B,A,A,B,B,A,-,A,A,B,-,A,B,A,B,B,B,-,B,A,-,B,B,A,B,A,A,-,A,A,A,A,-,B,B,A,B,A,A,B,A,B,-,B,B,B,A,B,B,A,-,B,-,A,B,A,B,A,A,B,-,-,A,B,B,A,A,-,A,-,B,A,A,A,B,A,A,A,B,B,A,B,B,B,A,A,B,A,B,A,A,A,B,A,A,A,B,A,B,-,A,B,A,A,B,A,B,A,A,A,B,A,B,B,B,A,B,A,B,B,B,A,B,-,B,B,-,B,A,A,-,A,B,A,A,A,-,B,B,-,A,A,A,B,A,-,A,B,A,A,A,A,-,B,A,B,-
S8_1708809,,-,B,B,B,A,A,A,B,A,A,B,A,B,A,A,B,B,A,A,A,A,B,A,A,B,A,B,B,B,A,B,A,A,B,B,A,B,A,A,B,A,A,A,A,A,B,B,A,B,A,A,B,A,B,A,B,B,B,A,B,B,A,B,B,A,A,B,A,B,A,A,B,A,A,A,B,B,A,A,-,A,A,B,A,A,A,B,A,A,A,B,B,A,B,B,B,A,A,B,A,B,A,A,A,B,A,A,A,B,A,B,-,A,B,A,A,B,A,B,A,A,A,B,A,B,B,B,A,B,A,B,B,B,A,B,B,B,B,B,B,-,A,-,A,B,A,A,A,-,B,B,A,A,-,A,B,A,A,A,B,A,A,A,-,B,B,A,B,A
S8_1746462,,-,B,-,B,A,A,A,B,A,A,B,A,B,A,A,B,B,A,A,A,A,B,-,A,B,A,B,B,B,A,B,A,-,B,B,A,B,A,A,B,A,A,A,A,A,B,B,A,B,A,A,B,A,B,A,B,B,B,A,B,B,A,B,B,A,A,B,A,B,A,A,B,A,A,A,B,B,A,A,-,-,A,B,-,A,A,B,A,A,A,B,B,A,B,B,B,A,A,B,A,-,A,A,A,B,A,A,A,B,A,B,-,A,B,A,A,A,A,B,A,A,A,B,A,B,A,B,A,B,A,B,-,B,B,A,B,B,B,-,B,-,A,-,A,-,A,A,A,-,B,B,A,A,-,A,B,A,A,A,B,A,A,A,B,-,B,A,B,A
S8_1783142,,-,B,-,B,A,A,A,B,A,A,B,A,B,A,A,B,B,A,A,A,A,B,-,A,B,A,B,B,B,A,B,A,A,B,B,A,B,A,A,B,A,A,A,A,A,B,B,A,B,A,A,B,A,B,A,B,B,B,A,B,B,A,B,B,A,A,B,A,B,A,A,B,A,-,A,B,B,A,A,B,A,A,B,A,A,A,B,A,A,A,B,B,A,B,B,B,A,A,B,A,B,A,A,A,B,A,A,A,B,A,B,B,A,B,A,A,A,A,B,A,A,A,B,B,B,A,B,A,B,A,B,B,B,B,A,B,B,B,-,B,-,A,-,A,B,A,A,A,-,B,B,A,A,-,A,B,A,A,A,B,A,B,A,B,-,B,A,B,A
S8_1785702,,-,B,-,B,A,A,A,B,A,A,B,A,B,A,A,B,B,A,A,A,A,B,A,A,B,A,B,B,B,A,B,A,A,B,B,A,B,A,A,B,A,A,A,A,A,B,B,A,B,A,A,B,A,B,A,B,B,B,A,B,B,A,B,B,A,A,B,A,B,A,A,B,A,A,A,B,B,A,A,-,A,A,B,A,A,A,B,A,A,A,B,B,A,B,B,B,A,A,B,A,B,A,A,A,B,A,A,A,B,A,B,-,A,B,A,A,A,A,B,A,A,A,B,B,B,A,B,A,B,A,B,B,B,B,A,B,B,B,B,B,-,A,-,A,B,A,A,A,-,B,B,A,A,-,A,B,A,A,A,B,A,B,A,B,-,B,A,B,A
S9_14431,,B,B,-,A,A,A,B,A,B,A,B,A,B,B,B,B,B,A,A,A,B,B,B,A,B,B,A,A,A,A,A,B,B,A,B,B,B,B,A,B,A,B,A,B,A,B,A,B,A,B,B,A,A,A,A,B,A,B,A,B,B,A,A,A,A,A,A,A,B,B,B,A,B,B,A,A,A,A,B,-,-,A,A,B,A,A,B,A,A,A,-,A,B,A,A,B,A,B,A,B,B,B,-,B,B,B,A,A,A,A,B,-,A,-,A,B,A,B,A,B,-,A,A,B,B,B,A,B,B,B,B,B,B,A,A,B,A,A,A,B,A,B,-,B,A,B,B,A,-,B,B,A,B,B,B,A,A,B,B,B,B,B,B,A,B,A,B,B,A
S9_50619,,-,B,-,A,-,A,B,A,B,A,B,-,B,B,B,B,B,A,A,-,B,B,-,A,B,-,A,A,A,A,A,B,B,A,B,-,B,B,A,B,A,B,A,B,A,B,A,B,A,B,B,A,A,A,A,B,A,B,A,B,B,-,-,A,A,-,A,A,B,B,B,-,B,-,A,A,A,A,B,-,A,A,A,B,A,A,B,A,A,-,-,A,B,A,A,B,A,B,A,B,B,B,-,B,B,B,-,A,-,A,B,-,B,-,A,-,A,B,-,B,-,A,A,B,B,B,A,B,-,B,B,B,B,A,A,-,A,A,-,B,A,B,-,B,A,B,B,A,-,B,A,A,B,B,-,A,A,-,B,B,B,B,-,A,-,A,B,B,A
S9_83653,,-,B,-,A,A,A,B,A,B,A,B,A,B,B,B,B,B,A,A,A,B,B,B,A,B,B,A,A,A,A,A,B,B,A,B,B,B,B,A,B,A,B,A,B,A,B,A,B,A,B,B,A,A,A,A,B,A,B,A,B,B,A,A,A,A,A,A,A,B,B,B,A,B,B,A,A,A,A,B,-,B,A,A,B,A,A,B,A,A,A,-,A,B,A,A,B,A,B,A,B,B,B,-,B,B,B,A,A,A,A,B,-,B,-,A,B,A,B,A,A,B,A,A,B,B,B,A,B,B,B,B,B,B,A,A,B,A,A,-,B,A,B,-,B,A,B,B,A,-,B,A,A,B,B,B,A,A,B,B,B,B,B,B,A,-,A,B,B,A
S9_89008,,-,B,-,A,A,A,-,A,B,A,B,A,B,B,-,B,B,A,A,-,B,B,B,A,B,B,A,A,A,A,-,B,B,A,B,B,B,-,A,B,A,B,A,B,A,B,A,B,A,B,B,A,A,A,A,B,A,B,A,B,B,A,-,A,A,A,A,A,B,B,B,A,B,-,A,A,A,A,B,-,B,A,A,B,A,A,B,A,B,A,B,A,B,A,A,B,A,B,A,B,B,B,A,B,B,B,A,A,A,A,B,-,B,-,A,-,A,B,-,-,B,A,A,B,B,B,A,B,B,-,B,B,B,A,A,B,A,A,A,B,A,B,-,B,A,B,B,A,-,B,A,-,B,B,B,A,A,B,B,B,B,B,B,A,-,A,B,B,A
S9_124414,,-,B,-,A,A,A,B,A,B,A,B,A,B,B,-,B,B,A,A,A,B,B,-,A,B,B,A,A,A,A,A,B,B,A,B,B,B,B,A,B,A,B,A,B,A,B,A,B,B,B,B,A,A,A,A,B,A,B,A,B,B,A,A,A,A,A,A,A,B,B,B,A,B,B,A,A,B,A,B,-,A,A,A,B,A,A,B,A,B,A,B,A,B,A,A,B,A,B,A,B,B,B,-,B,B,B,A,A,A,A,B,A,B,-,A,B,A,B,A,A,B,A,A,B,B,B,A,B,B,B,B,B,B,B,A,-,A,A,-,B,A,B,-,B,A,B,B,A,-,B,A,A,B,B,B,A,A,-,B,B,B,B,B,A,-,A,B,B,B
S9_186564,,-,B,-,A,A,A,B,A,B,A,B,A,B,B,B,B,B,A,A,A,B,B,-,A,B,B,A,A,A,A,A,B,B,A,B,B,B,B,A,B,A,B,A,B,A,B,A,B,B,B,B,A,A,A,A,B,A,B,A,B,B,A,A,B,A,A,A,A,B,B,B,A,B,-,A,A,B,A,B,-,A,A,A,B,A,A,B,A,B,A,A,A,B,A,A,B,A,B,A,B,B,B,-,B,B,B,A,A,B,A,B,-,B,-,A,B,A,B,A,A,B,A,A,B,B,B,A,B,B,B,B,B,B,B,A,B,A,A,A,B,A,B,-,B,A,B,B,A,-,B,A,A,B,B,B,A,A,B,B,B,B,B,B,A,B,A,B,B,B
S9_213630,,-,B,-,A,A,A,B,A,B,A,B,A,B,B,B,B,B,A,A,A,B,B,-,A,B,B,A,A,A,A,A,B,B,A,B,B,B,B,A,B,A,B,A,B,A,B,A,B,B,B,B,A,A,A,A,B,A,B,A,B,B,A,A,B,A,A,A,A,B,B,B,A,B,B,A,A,B,A,B,-,A,A,A,B,A,A,B,A,B,A,-,A,B,A,A,B,A,B,A,B,B,B,B,B,B,B,A,A,B,A,B,-,B,-,A,B,A,B,A,A,B,A,A,B,B,B,A,B,B,B,B,B,B,B,A,B,A,A,A,B,A,B,-,B,A,B,B,A,-,B,A,A,B,B,B,A,A,B,B,B,B,B,B,A,-,A,B,B,B
S9_229689,,-,B,-,A,A,A,B,A,B,A,B,A,B,B,-,B,B,A,-,A,B,B,-,A,B,B,A,-,A,A,-,B,-,A,B,B,B,B,A,-,A,B,A,B,A,B,A,B,B,B,B,A,A,A,A,B,A,B,A,B,-,A,-,B,-,A,A,A,B,B,B,A,B,-,A,-,B,A,B,-,A,A,A,-,A,A,B,A,B,A,-,A,B,A,A,B,A,B,A,-,B,B,-,B,B,B,A,A,B,A,B,-,B,-,A,B,A,B,-,-,-,A,A,B,B,B,A,-,-,B,B,B,B,B,-,-,A,-,A,B,A,B,-,B,A,B,B,A,-,B,A,-,B,B,B,-,A,B,B,B,B,B,B,A,-,A,B,B,-
S9_273301,,-,B,B,A,A,A,B,A,B,A,B,A,B,B,B,B,B,A,A,A,B,B,-,A,B,B,A,A,A,A,A,B,B,A,B,B,B,B,A,B,A,B,A,B,A,B,A,B,B,B,B,A,A,A,A,B,A,B,A,A,B,A,A,B,A,A,A,A,B,B,B,A,B,B,A,A,B,A,B,A,A,A,A,B,A,A,B,A,B,A,-,A,B,A,A,B,A,B,A,B,B,B,-,B,B,B,A,A,B,A,B,A,B,-,A,A,A,B,A,A,B,A,A,B,B,B,A,B,B,B,B,B,B,B,A,B,A,A,A,B,A,B,-,B,A,B,B,A,-,B,A,A,B,B,B,A,A,B,B,B,B,B,B,A,-,A,B,B,A
S9_280404,,-,B,-,A,A,A,B,A,B,A,B,A,B,B,B,B,B,A,A,A,B,B,-,A,B,B,A,A,A,A,A,B,B,A,B,B,B,B,A,B,A,B,A,B,A,B,A,B,B,B,B,A,A,A,A,B,A,B,A,A,B,A,-,B,A,A,A,A,B,B,B,A,B,B,A,A,B,A,B,-,A,A,A,B,A,A,B,A,B,A,-,A,B,A,A,B,A,B,A,B,B,B,-,B,B,B,A,A,B,A,B,-,B,-,A,A,A,B,A,A,B,A,A,B,B,B,A,B,B,B,B,B,B,B,A,B,A,A,-,B,A,B,-,B,A,B,B,A,-,B,A,A,B,B,B,A,A,B,B,B,B,B,B,A,-,A,B,B,A
S9_327264,,-,B,-,A,A,A,B,A,B,A,-,A,B,B,-,B,B,A,A,A,B,B,-,A,B,B,A,A,A,A,A,B,B,A,B,B,B,-,A,B,A,B,A,B,A,B,A,B,B,B,B,A,A,A,A,B,A,-,A,A,B,A,A,B,A,A,A,A,B,B,B,A,B,B,A,A,B,A,B,-,A,A,A,B,A,A,B,A,B,A,B,A,-,A,A,B,A,B,A,B,B,B,-,B,B,B,A,A,B,A,-,A,B,A,A,A,A,B,A,A,B,A,A,B,B,B,A,B,B,B,B,-,B,B,A,B,A,A,A,B,A,B,-,B,A,B,B,A,-,B,A,A,B,B,B,A,A,-,B,B,B,B,B,A,-,A,B,B,A
S9_355894,,B,B,-,A,A,A,B,A,B,A,B,A,B,B,B,B,B,A,A,A,B,B,-,A,B,B,A,A,A,A,A,B,B,A,B,B,B,B,A,B,A,B,A,B,A,B,A,B,B,B,B,A,A,A,A,B,A,B,A,A,B,A,A,B,A,A,A,A,B,B,B,A,B,-,A,A,B,A,B,-,A,A,A,B,A,A,B,A,B,A,-,A,B,A,A,B,A,B,A,B,B,B,-,B,B,B,A,A,B,A,B,-,B,-,A,A,A,B,A,A,B,A,A,B,B,B,A,B,B,B,B,B,B,B,A,B,B,A,A,B,A,B,-,B,A,B,B,A,-,B,A,A,B,B,B,A,A,B,B,B,B,B,B,B,-,A,B,B,A
S9_376167,,-,B,-,A,A,A,B,A,B,A,B,A,B,-,-,B,B,A,-,A,-,B,-,A,B,B,A,A,A,A,A,B,B,A,B,-,-,-,A,B,A,B,A,B,A,B,A,-,B,B,B,A,A,A,A,B,A,B,A,A,B,A,-,B,A,A,A,A,B,B,B,A,B,-,A,A,B,A,B,-,A,A,A,B,A,A,-,A,-,A,A,A,B,A,A,-,A,B,A,B,B,B,-,B,B,-,A,A,-,A,B,-,B,A,A,-,A,B,A,A,B,A,A,B,B,B,A,B,-,B,B,B,B,B,A,-,B,A,-,-,A,B,-,-,A,B,B,A,-,B,A,-,B,B,B,A,A,-,B,B,B,B,-,B,-,A,B,B,A
S9_377635,,-,B,-,A,A,A,-,A,B,A,B,A,B,B,B,B,B,A,A,A,B,B,-,A,B,B,A,-,A,A,A,B,B,A,B,B,B,-,A,B,A,B,A,B,-,B,A,B,B,B,B,A,A,A,A,B,A,B,A,A,B,A,-,B,A,-,A,A,B,B,B,A,B,-,A,A,B,A,B,-,A,A,A,B,A,A,B,A,B,A,-,A,B,A,A,B,A,B,A,B,B,B,-,B,B,B,A,A,B,A,B,-,B,-,A,A,A,B,A,A,B,A,A,B,B,B,A,B,-,B,B,B,B,B,-,-,B,A,-,B,A,B,-,B,A,B,B,A,-,B,A,A,B,B,B,A,A,-,B,B,B,B,B,B,-,A,B,B,A
S9_380674,,-,B,-,A,-,A,B,A,B,A,B,-,B,B,B,B,B,A,-,A,B,B,B,A,B,B,A,-,A,-,-,B,-,A,B,B,B,B,A,B,-,B,A,B,-,B,A,B,B,B,B,-,-,A,A,B,A,B,A,A,B,A,-,B,A,-,A,A,B,B,B,A,B,-,A,A,B,A,B,A,A,A,A,B,-,-,B,-,B,A,-,A,B,A,A,B,A,B,A,B,B,B,B,B,B,B,-,-,B,A,B,-,B,-,A,-,A,B,A,A,B,A,A,B,B,B,A,B,-,B,B,B,B,B,-,-,B,A,-,B,A,B,-,B,A,B,B,A,B,B,A,-,B,B,B,-,A,B,B,B,B,B,B,B,-,A,B,B,A
S9_382270,,-,B,-,A,A,A,B,A,B,A,B,A,B,B,B,B,B,A,A,A,B,B,B,A,B,B,A,A,A,A,-,B,B,A,B,B,B,B,A,B,A,B,A,B,A,B,A,B,B,B,B,A,A,A,A,B,A,B,A,A,B,A,A,B,A,A,-,A,B,B,B,A,B,B,A,A,B,A,B,-,A,A,A,B,A,A,B,A,B,A,-,A,B,A,A,B,A,B,A,B,B,B,-,B,B,B,A,A,B,A,B,-,B,-,A,B,A,B,A,-,B,A,A,B,B,B,A,B,B,B,B,B,B,B,A,B,B,A,-,B,A,B,-,B,A,B,B,A,B,B,A,A,B,B,B,A,A,B,B,B,B,B,B,B,-,A,B,B,A
S9_385213,,-,B,B,A,A,A,B,A,B,A,B,A,B,B,B,B,B,A,A,A,B,B,B,A,B,B,A,A,A,A,A,B,B,A,B,B,B,B,A,B,A,B,A,B,A,B,A,B,B,B,B,A,A,A,A,B,A,B,A,A,B,A,A,B,A,A,A,A,B,B,B,A,B,B,A,A,B,A,B,B,A,A,A,B,A,A,B,A,B,A,-,A,B,A,A,B,A,B,A,B,B,B,-,B,B,B,A,A,B,A,B,-,B,-,A,A,A,B,A,A,B,A,A,B,B,B,A,B,B,B,B,B,B,B,A,B,B,A,A,B,A,B,B,B,A,B,B,A,-,B,A,A,B,B,B,A,A,B,B,B,B,B,B,B,-,A,B,B,A
S9_394328,,-,B,-,A,A,A,B,A,B,A,B,A,B,B,B,B,B,A,A,A,B,B,-,A,B,B,A,A,A,A,A,B,B,A,B,B,B,B,A,B,A,B,A,B,A,B,A,B,B,B,B,A,A,A,A,B,A,B,A,A,B,A,A,B,A,A,A,A,B,B,B,A,B,-,A,A,B,A,B,-,A,A,A,B,A,A,B,A,B,A,-,A,B,A,A,B,A,B,A,B,B,B,-,B,B,B,A,A,B,A,B,-,B,-,A,A,A,B,A,A,B,A,A,B,B,B,A,B,B,B,B,B,B,B,A,B,B,A,A,B,A,B,-,B,A,B,B,A,-,B,A,A,B,B,B,A,A,B,B,B,B,B,B,B,-,A,B,B,A
S9_395406,,-,B,-,A,A,A,B,A,B,A,B,A,B,B,-,B,B,A,A,A,B,B,-,A,B,B,A,-,A,A,A,B,-,A,B,B,B,B,A,B,A,B,A,B,A,B,A,B,B,B,B,A,A,A,A,B,A,B,A,A,B,-,-,B,A,A,-,A,B,B,B,A,B,-,A,A,B,A,B,-,A,A,A,B,A,A,B,A,B,A,B,A,B,A,A,B,A,B,A,B,B,B,-,B,B,B,A,A,B,A,-,-,B,-,A,A,A,B,A,A,B,A,A,B,B,B,A,B,B,B,B,B,B,B,-,B,B,A,-,B,A,B,-,B,A,B,B,A,-,B,A,-,B,B,B,A,A,-,B,B,B,B,B,B,-,A,B,B,A
S9_401558,,-,B,-,A,A,A,B,A,B,A,B,A,B,B,B,B,B,A,A,A,B,B,-,A,B,B,A,A,A,A,A,B,B,A,B,B,B,-,A,B,A,B,A,B,A,B,A,B,B,B,B,A,A,A,A,B,A,B,A,A,B,A,A,B,A,A,A,A,B,B,B,A,B,B,A,A,B,A,B,-,A,A,A,B,A,A,B,A,B,A,-,A,B,A,A,B,A,B,A,B,B,B,-,B,B,B,A,A,B,A,B,-,B,-,A,A,A,B,A,A,B,A,A,B,B,B,A,B,-,B,B,B,B,B,A,B,B,A,A,B,A,B,-,B,A,B,B,A,-,B,A,A,B,B,B,A,A,B,B,B,B,B,B,B,-,A,B,B,A
S9_402818,,-,B,-,A,A,A,B,A,B,A,B,A,B,B,B,B,B,A,A,A,B,B,-,A,B,B,A,A,A,A,A,B,B,A,B,B,B,B,A,B,A,B,A,B,A,-,A,B,B,B,B,A,A,A,A,B,A,B,A,A,B,A,A,B,A,A,A,A,B,B,B,A,B,-,A,A,B,A,B,-,A,-,A,B,A,A,B,A,B,A,B,-,B,A,A,B,A,B,A,B,B,B,-,B,B,B,A,A,B,B,B,-,B,A,A,A,A,B,A,A,B,A,A,B,B,B,A,B,B,B,B,B,B,B,A,-,B,A,-,B,A,B,-,B,A,B,B,A,-,B,A,A,B,B,B,A,A,-,B,B,B,B,B,B,-,A,B,B,A
S9_406543,,-,B,-,A,A,A,-,A,B,A,B,-,B,B,-,B,B,A,A,A,B,B,-,A,B,-,A,A,A,-,A,B,-,A,B,B,B,-,A,B,A,B,A,B,A,B,A,B,B,B,B,A,A,A,A,B,A,B,A,A,B,A,-,B,-,A,A,A,B,B,B,A,B,-,A,A,B,A,B,-,A,A,A,B,A,A,B,A,B,A,-,A,B,A,A,B,A,B,A,B,B,-,-,B,B,B,A,A,B,B,B,-,B,A,A,A,A,B,A,A,B,A,A,B,B,B,A,-,B,B,B,B,B,B,A,B,B,A,A,B,A,B,-,B,A,B,B,A,-,B,A,A,B,B,B,A,A,B,B,B,B,B,B,B,A,A,B,B,A
S9_519286,,-,B,-,A,A,A,B,A,B,A,B,A,B,B,B,A,B,A,A,A,B,B,-,A,B,B,A,A,A,A,A,B,B,A,B,B,B,B,B,B,A,B,A,B,A,B,B,B,B,B,B,A,A,A,A,B,A,B,A,-,B,A,B,B,A,A,A,A,B,B,B,A,B,-,A,A,B,A,B,-,A,A,A,B,A,A,B,A,B,A,A,A,B,A,A,B,A,B,A,B,B,B,B,B,B,B,B,A,B,B,B,A,B,A,A,-,A,B,A,A,B,A,A,B,B,B,A,B,B,B,B,B,B,B,A,B,B,A,A,B,A,B,-,B,A,B,B,A,-,B,A,A,B,B,B,A,A,B,B,B,B,B,B,B,-,A,B,B,B
S9_523542,,-,B,-,A,A,A,B,A,B,A,B,-,B,B,B,A,B,A,A,A,B,B,-,A,B,B,A,A,A,A,A,B,B,A,B,B,B,B,B,B,A,B,A,B,A,B,B,B,B,B,B,A,A,A,A,B,A,B,A,-,B,A,-,B,A,A,A,A,B,B,B,A,B,-,A,A,B,A,B,-,A,A,A,B,A,A,B,A,B,A,A,A,-,A,A,B,A,B,A,B,B,B,B,B,B,B,B,A,B,B,B,A,B,A,A,-,A,B,A,A,B,A,A,B,B,B,A,B,B,B,B,B,B,B,A,B,B,A,-,B,A,B,-,B,A,B,B,A,-,B,A,A,B,B,B,A,A,-,B,B,B,B,B,B,-,A,B,B,B
S9_527604,,-,B,-,A,-,A,B,A,B,A,B,-,B,B,-,A,B,A,-,-,B,B,-,A,B,B,A,-,A,A,A,-,-,A,B,B,B,-,B,B,A,B,A,B,A,B,-,B,B,B,B,A,A,A,A,B,A,B,A,A,-,A,-,B,A,-,-,A,B,B,B,A,B,-,A,A,B,A,B,-,A,A,A,-,A,A,B,A,B,A,A,A,B,A,A,B,A,B,A,-,-,B,B,B,B,B,B,A,B,B,B,-,B,A,-,-,A,B,A,A,B,A,A,B,B,B,A,B,B,B,B,B,B,-,A,-,B,-,-,B,A,B,-,B,A,B,B,A,-,B,A,A,B,B,B,A,A,-,B,B,B,B,B,B,-,A,B,B,B
S9_541654,,-,B,-,A,A,A,B,A,B,A,B,A,B,B,B,A,B,A,A,A,B,B,-,A,B,B,A,A,A,A,A,B,B,A,B,B,B,B,B,B,A,B,A,B,A,B,B,B,B,B,B,A,A,A,A,B,A,B,A,-,B,A,B,B,A,A,A,A,B,B,B,A,B,B,A,A,B,A,B,A,A,A,A,B,A,A,B,A,B,A,A,A,B,A,A,B,A,B,A,B,B,B,B,B,B,B,B,A,B,B,B,A,B,A,A,-,A,A,A,A,B,A,A,B,B,B,A,B,B,B,B,B,B,B,A,B,B,A,A,B,A,B,-,B,A,B,B,A,-,B,A,A,B,B,B,A,A,B,B,B,B,B,B,B,-,A,B,B,B
S9_613808,,-,B,-,A,A,A,B,A,B,A,B,-,A,B,-,A,B,A,A,A,B,B,-,A,B,B,A,A,A,A,A,B,-,A,B,B,B,B,B,B,A,B,A,B,-,B,B,B,B,B,B,A,A,A,A,B,A,B,A,-,B,A,-,B,A,A,A,A,B,B,B,A,B,-,B,A,B,A,B,-,A,A,A,B,A,A,B,A,B,A,A,A,B,A,A,B,A,B,A,B,B,B,B,B,B,-,B,A,B,B,B,-,B,A,A,B,A,A,A,A,B,B,A,B,B,B,A,B,B,B,B,B,B,B,A,-,B,A,A,B,A,B,-,B,B,B,B,A,-,B,A,A,-,B,B,A,B,B,B,B,B,B,B,B,-,A,B,B,B
S9_648631,,-,B,-,A,A,A,B,A,B,A,B,A,A,B,B,A,B,A,A,A,B,B,B,A,B,B,B,A,A,A,A,B,B,A,B,B,B,B,B,B,A,B,A,B,A,B,B,B,B,B,B,A,A,A,A,B,A,B,A,-,B,A,-,B,A,A,A,A,B,B,B,A,B,A,B,A,B,A,B,-,A,A,A,B,A,A,B,A,B,A,A,A,B,A,A,B,A,B,A,B,B,B,B,B,B,B,B,A,B,B,B,-,B,A,A,B,A,A,A,A,B,B,A,B,B,B,A,B,B,B,B,B,B,B,A,B,B,A,A,B,A,B,-,B,B,B,B,A,-,B,A,A,-,B,B,A,B,B,B,B,B,B,B,B,-,A,B,B,B
S9_680321,,-,B,-,A,A,A,B,A,B,A,B,A,A,B,B,A,-,A,A,A,B,B,B,A,B,B,B,A,A,A,A,B,B,A,B,B,B,B,B,B,A,B,A,B,A,B,B,B,B,B,B,A,B,A,A,B,A,B,A,A,B,A,B,B,A,A,A,A,B,B,B,A,B,-,B,A,B,A,B,A,A,A,A,B,A,A,B,A,B,A,A,A,B,A,A,B,A,B,A,B,B,B,B,B,B,B,B,A,B,B,B,-,B,A,A,B,A,A,A,A,B,B,B,B,B,B,A,B,B,B,B,B,B,B,A,-,B,A,A,B,A,B,-,B,B,B,B,A,-,B,A,A,-,B,B,A,B,B,A,B,B,B,B,B,-,A,B,B,B
S9_698837,,-,B,-,A,A,A,B,A,B,A,B,A,A,B,B,A,B,A,A,A,B,B,B,A,B,B,B,A,A,A,A,B,B,A,B,B,B,B,B,B,A,B,A,B,A,B,B,B,B,B,B,A,B,A,A,B,A,B,A,A,-,A,-,B,A,A,A,A,B,B,B,A,B,A,B,A,B,A,B,-,A,A,A,B,A,A,B,A,B,A,A,A,B,A,A,B,A,B,A,B,B,B,B,B,B,B,B,A,B,B,B,-,B,A,A,B,A,A,A,A,B,B,B,B,B,B,A,B,B,B,B,B,B,B,A,B,B,A,A,B,A,B,-,B,B,B,B,A,-,B,A,A,-,B,B,A,B,B,A,B,B,B,B,B,-,A,B,B,B
S9_700053,,-,B,-,A,A,A,B,A,B,A,B,B,A,B,B,A,B,A,A,A,B,B,-,A,B,B,B,A,A,A,A,B,B,A,B,B,B,B,B,B,A,B,A,B,A,B,B,B,B,B,B,A,B,A,A,B,A,B,A,A,B,A,B,B,A,A,A,A,B,B,B,A,B,-,B,A,B,A,B,A,A,A,A,B,A,A,B,A,B,A,A,A,B,A,A,B,A,B,A,B,B,B,B,B,B,B,B,A,B,B,B,-,B,A,A,B,A,A,A,A,B,B,B,B,B,B,A,B,B,B,B,B,B,B,A,B,B,A,A,B,A,B,-,B,B,B,B,A,-,B,A,A,-,B,B,A,B,B,A,B,B,B,B,B,-,A,B,B,B
S9_702411,,-,B,-,A,A,A,B,A,B,A,B,B,A,B,B,A,B,A,A,A,B,B,B,A,B,B,B,A,A,A,A,B,B,A,B,B,B,B,B,B,A,B,A,B,A,B,B,B,B,B,B,A,B,A,A,B,A,B,A,A,B,A,B,B,A,A,A,A,B,B,B,A,B,A,B,A,B,A,B,-,A,A,A,B,A,A,B,A,B,A,A,A,B,A,A,B,A,B,A,B,B,B,B,B,B,B,B,A,B,B,B,-,B,A,A,B,A,A,A,A,B,B,B,B,B,B,A,B,B,B,B,B,B,B,A,B,B,A,A,B,A,B,-,B,B,B,B,A,B,B,A,A,-,B,B,A,B,B,A,B,B,B,B,B,-,A,B,B,B
S9_765599,,-,B,-,B,B,A,B,A,B,A,B,B,A,B,B,A,B,A,A,A,B,B,-,A,B,B,B,A,B,A,A,B,B,A,B,B,B,B,B,B,A,B,A,B,A,B,B,B,B,B,B,A,B,A,B,B,A,B,A,A,B,A,B,B,A,A,A,A,B,B,B,A,B,-,B,A,B,A,B,-,A,A,A,B,B,A,B,B,B,B,A,A,B,A,A,B,A,B,A,B,B,B,B,B,B,B,B,A,B,B,B,A,B,A,A,B,A,A,A,A,B,B,B,B,B,B,A,B,B,B,B,B,B,B,A,B,B,A,A,B,A,B,-,B,B,B,B,A,-,B,B,A,-,B,B,A,B,B,A,B,B,B,B,B,-,A,B,B,B
S9_786473,,-,B,-,B,B,A,B,A,B,A,B,B,A,B,B,A,B,A,A,A,B,B,-,A,B,B,B,A,B,A,A,B,B,A,B,B,B,B,B,B,A,B,A,B,A,B,B,B,B,B,B,A,B,A,B,B,A,B,A,A,B,A,-,B,A,A,A,A,B,B,B,A,B,-,B,A,B,A,B,-,A,A,A,B,B,A,B,B,B,B,A,A,B,A,A,B,A,B,A,B,B,B,B,B,B,B,B,A,B,B,B,-,B,A,A,B,A,A,A,A,B,B,B,B,B,B,B,B,B,B,B,B,B,B,A,B,B,A,A,B,A,B,-,B,B,B,B,A,-,B,B,A,-,B,B,A,B,B,A,B,B,B,B,B,B,A,B,B,B
S9_792361,,-,B,-,B,B,A,B,A,B,A,B,B,A,B,B,A,B,A,A,A,B,B,B,A,B,B,B,A,B,A,A,B,B,A,B,B,B,B,B,B,A,B,A,B,A,B,B,B,B,B,B,A,B,A,B,B,A,B,A,A,B,A,B,B,A,A,A,A,B,B,B,A,B,-,B,A,B,A,B,-,A,A,A,B,B,A,B,B,B,B,A,A,B,A,A,B,A,B,A,B,B,B,B,B,B,B,B,A,B,B,B,-,B,A,A,B,A,A,A,A,B,B,B,B,B,B,B,B,B,B,B,B,B,B,A,B,B,A,A,B,A,B,-,B,B,B,B,A,-,B,B,A,-,B,B,A,B,B,A,B,B,B,B,B,-,A,B,B,B
S9_795163,,-,B,-,B,B,A,B,A,B,-,-,B,A,B,B,A,B,A,A,A,B,B,-,A,B,B,B,A,B,A,A,B,B,A,B,B,B,B,B,B,A,B,A,B,A,B,B,B,B,B,B,A,B,A,B,B,A,B,A,A,B,A,-,B,A,A,A,A,B,B,B,A,B,-,B,A,B,A,B,B,A,A,A,B,B,A,B,B,B,B,A,A,B,A,A,B,A,B,A,B,B,B,B,B,B,B,B,A,B,B,B,-,B,A,A,B,A,A,A,A,B,B,B,B,B,B,B,B,-,B,B,B,B,B,A,B,B,A,-,B,A,B,-,B,B,B,B,A,-,B,B,A,B,B,B,A,B,B,A,B,B,B,B,B,-,A,B,B,B
S9_796449,,-,B,-,B,B,A,B,A,B,A,B,B,A,B,B,A,B,A,A,A,B,B,-,A,B,B,B,-,B,A,-,B,-,A,B,B,B,B,B,B,A,B,A,B,-,B,B,B,B,B,B,A,B,A,B,B,A,B,A,A,B,A,-,B,-,-,A,A,B,B,B,A,B,-,B,A,B,A,B,-,A,A,A,B,B,A,B,B,B,B,A,A,B,A,A,B,A,B,A,B,B,B,B,B,B,-,B,A,B,B,B,-,B,A,A,B,A,A,A,A,B,B,B,B,B,B,B,B,-,B,B,B,B,B,A,B,B,A,-,B,A,B,-,B,B,B,B,A,-,B,B,A,-,B,B,A,B,-,A,B,B,B,B,B,-,A,B,B,B
S11_83870,,-,B,-,B,-,B,A,-,A,B,B,B,B,A,-,B,A,A,B,B,-,B,-,B,B,A,B,-,A,B,B,A,A,A,A,A,A,-,B,B,A,A,A,A,-,A,B,B,B,A,B,A,B,B,B,B,B,B,B,A,A,A,-,-,B,A,A,A,B,A,B,-,B,-,B,-,B,A,A,-,A,A,B,B,B,B,B,B,A,B,A,B,-,B,A,B,B,A,B,B,A,B,B,-,B,A,A,B,A,B,B,-,A,A,B,B,A,A,A,-,A,A,A,A,B,A,B,B,A,A,B,A,A,A,A,-,B,B,-,A,A,B,-,B,A,B,B,B,-,B,A,-,A,A,A,A,A,-,A,A,B,B,B,A,-,B,A,A,A
S11_95687,,-,B,-,B,B,B,A,B,-,-,-,B,B,A,B,B,A,A,B,B,B,B,-,B,B,A,B,A,A,B,-,A,A,A,A,A,-,B,B,B,-,A,A,A,-,A,B,B,B,A,B,A,B,B,B,B,-,B,B,A,A,A,-,A,B,A,-,A,B,A,B,A,B,-,B,A,B,A,A,-,A,A,B,-,B,B,B,B,A,B,A,B,B,B,A,B,B,A,B,B,A,B,-,A,B,A,A,B,A,B,B,-,A,A,B,B,A,A,A,B,A,A,A,A,B,B,B,B,-,A,B,A,A,A,A,-,B,B,-,A,A,B,-,B,A,B,B,B,-,B,A,A,A,A,A,A,A,B,A,A,B,B,B,A,-,B,A,A,A
S11_98576,,-,B,-,B,B,B,A,B,A,B,B,B,B,A,B,B,A,A,B,B,B,B,A,B,B,A,B,A,A,B,B,A,A,A,A,A,A,B,B,B,A,A,A,A,B,A,B,B,B,A,B,A,B,B,B,B,B,B,B,A,A,A,A,A,B,A,A,A,B,A,B,A,B,B,B,A,B,A,A,-,A,A,B,B,B,B,B,B,A,B,A,B,B,B,A,B,B,A,B,B,A,B,-,A,B,A,A,B,A,B,B,-,A,A,B,B,A,A,A,B,A,A,A,A,B,-,B,B,-,A,B,A,A,A,A,A,B,B,B,A,A,B,-,B,-,B,B,B,-,B,A,A,A,A,A,A,A,B,A,A,B,B,B,A,-,B,A,A,A
S11_100605,,A,B,-,B,B,B,A,B,A,B,B,B,B,A,B,B,A,A,B,B,B,B,A,B,B,A,B,A,A,B,B,A,A,A,A,A,A,B,B,B,A,A,A,A,B,A,B,B,B,A,B,A,B,B,B,B,B,B,B,A,A,A,-,A,B,A,A,A,B,A,B,A,B,-,B,A,B,A,A,B,A,A,B,B,B,B,B,B,A,B,A,B,B,B,A,B,B,A,B,B,A,B,-,A,B,A,A,B,A,B,B,-,A,A,B,B,A,A,A,B,A,A,A,A,B,-,B,B,A,A,B,A,A,A,A,A,B,B,B,A,A,B,B,B,-,B,B,B,-,B,A,A,A,A,A,A,A,B,A,A,B,B,B,A,A,B,A,A,A
S11_114139,,-,B,-,B,B,B,A,B,A,B,B,B,B,A,B,B,A,A,B,B,B,B,-,B,B,A,B,A,A,B,B,A,A,A,A,A,A,B,B,B,A,A,A,A,B,A,B,B,B,A,B,A,B,B,B,B,B,B,B,A,A,A,A,A,B,A,A,A,B,A,B,A,B,-,B,A,B,A,A,-,A,A,B,B,B,B,B,B,A,B,A,B,B,B,A,B,B,A,B,A,A,B,-,A,B,A,A,B,A,B,B,-,A,A,B,B,A,A,A,B,A,A,A,A,B,A,B,B,A,A,B,A,A,A,A,A,B,B,-,A,A,B,-,B,A,B,B,B,-,B,A,A,A,A,A,A,A,B,A,A,B,B,B,A,-,B,A,A,A
S11_130010,,-,B,-,B,B,B,A,B,-,B,B,B,B,A,B,B,A,A,B,B,B,B,-,B,B,A,B,A,A,B,B,A,A,A,A,A,A,B,B,B,A,A,A,A,B,A,B,B,B,A,B,A,B,B,B,B,B,B,B,A,A,A,A,A,B,A,B,A,B,A,B,A,B,-,B,A,B,A,A,B,A,A,B,B,B,B,B,B,A,B,A,B,B,B,B,B,B,A,B,B,A,B,-,A,B,A,A,B,A,B,B,-,A,A,B,B,A,A,A,B,A,A,A,A,B,A,B,B,-,A,B,A,A,A,A,-,B,B,B,A,A,B,-,B,A,B,B,B,-,B,A,A,A,A,A,A,A,B,A,A,B,B,B,A,-,B,A,A,A
S11_150681,,-,B,-,B,B,B,A,B,A,B,B,B,B,A,-,B,A,A,B,B,B,B,-,B,B,A,B,A,A,B,B,A,A,A,A,A,A,B,B,B,A,A,A,A,B,A,B,B,B,A,B,A,B,B,-,B,B,B,B,A,A,A,A,A,B,A,B,A,B,A,B,A,B,-,B,A,B,A,A,B,A,A,B,B,B,B,B,B,A,B,A,B,B,B,B,B,B,A,B,B,A,B,-,A,B,A,A,B,A,B,B,B,A,A,B,-,A,A,A,B,A,A,A,A,B,A,B,B,A,A,B,A,A,-,A,A,B,B,-,A,A,B,-,B,-,B,B,B,-,B,A,-,A,A,A,A,A,B,A,A,B,B,B,A,-,B,A,A,A
S11_210629,,-,B,-,B,B,B,A,B,A,B,B,B,B,-,B,B,A,A,B,B,B,B,-,B,B,A,B,A,A,B,B,A,A,A,A,A,A,B,B,B,A,A,A,A,B,A,B,B,B,A,B,A,B,B,A,B,B,B,B,A,A,A,A,A,B,A,B,A,B,A,B,A,B,-,B,A,B,A,A,-,A,A,B,B,B,B,B,B,A,B,A,B,B,B,B,B,B,A,B,B,A,B,-,A,B,A,A,B,A,B,B,A,A,A,B,B,A,A,A,B,A,A,A,A,B,A,B,B,A,A,B,B,A,A,A,A,B,B,B,A,A,B,-,B,A,B,B,B,-,B,A,A,A,A,A,A,A,B,A,A,B,B,B,A,-,B,A,A,A
S11_220766,,-,B,-,B,B,B,-,B,A,B,B,B,B,-,B,B,A,A,A,B,B,B,-,B,B,A,B,A,-,B,B,A,A,A,A,A,A,B,B,B,A,A,A,A,B,A,B,B,B,A,B,A,B,B,A,B,B,B,B,A,A,A,A,A,B,-,B,A,B,A,B,A,B,B,B,A,B,A,-,B,A,-,B,B,B,B,B,B,A,B,A,B,B,B,B,B,B,A,B,A,A,B,-,A,B,A,A,B,A,B,B,A,A,A,B,B,A,A,A,B,A,A,A,A,B,B,B,B,A,A,B,B,A,A,-,A,B,B,B,A,A,B,-,B,B,B,B,B,-,B,A,A,-,A,-,A,A,B,A,A,B,B,B,A,A,B,A,A,A
S11_229699,,-,B,-,B,B,B,A,B,A,B,B,-,B,-,B,B,A,A,A,B,B,B,A,B,B,A,B,A,A,B,B,A,A,A,A,A,A,B,B,B,A,A,A,A,B,A,B,B,B,A,B,A,B,B,A,B,B,B,B,A,A,A,A,A,B,A,B,A,B,A,B,A,B,-,B,A,B,A,A,B,A,A,B,B,B,B,B,B,A,B,A,B,B,B,B,B,B,A,B,A,A,B,-,A,B,A,A,B,A,B,B,-,A,A,B,B,A,A,A,B,A,A,A,A,B,A,B,B,A,A,B,B,A,A,A,A,B,B,B,A,A,B,-,B,-,B,B,B,-,B,A,A,A,A,A,A,A,B,A,A,B,B,B,A,A,B,A,A,A
S11_230705,,-,B,-,B,B,B,A,B,A,B,B,B,B,-,B,B,A,A,A,B,B,B,-,B,B,A,B,A,A,B,B,A,A,A,A,A,A,B,B,B,A,A,A,A,B,A,B,B,B,A,B,A,B,B,A,B,B,B,B,A,A,A,A,A,B,A,B,A,B,A,B,A,B,B,B,A,B,A,A,-,A,A,B,B,B,B,B,B,A,B,A,B,B,B,B,B,B,A,B,A,A,B,-,A,B,A,A,B,A,B,B,-,A,A,B,B,A,A,A,B,A,A,A,A,B,-,B,B,A,A,B,B,A,A,A,A,B,B,B,A,A,B,-,B,A,B,B,B,-,B,A,A,A,A,A,A,A,B,A,A,B,B,B,A,-,B,A,A,A
S11_231967,,-,B,-,B,B,B,A,B,A,B,B,-,B,B,-,B,A,A,A,B,B,B,-,B,B,A,B,A,A,B,B,A,A,A,A,A,A,B,B,B,A,A,A,A,B,A,B,B,B,A,B,A,B,B,A,B,B,B,B,A,A,A,A,A,B,A,B,A,B,A,B,A,B,-,B,A,B,A,A,-,A,A,B,B,B,B,B,B,A,B,A,B,B,B,B,B,B,A,B,A,A,B,A,A,B,A,A,B,A,B,B,A,A,A,B,B,A,A,A,B,A,A,A,A,B,A,B,B,A,A,B,B,A,A,A,-,B,B,-,A,A,B,-,B,A,B,B,B,-,B,A,A,A,A,A,A,A,B,A,A,B,B,B,A,-,B,A,A,A
S11_232991,,-,B,-,B,B,B,A,B,A,B,B,B,B,-,B,B,A,A,A,B,B,B,-,B,B,A,B,A,A,B,B,A,A,A,A,A,A,B,B,B,A,A,A,A,B,A,B,B,B,A,B,A,B,B,A,B,B,B,B,A,A,A,A,A,B,A,B,A,B,A,B,A,B,-,B,A,B,A,A,B,A,A,B,B,B,B,B,B,A,B,A,B,B,B,B,B,B,A,B,A,A,B,A,A,B,A,A,B,A,B,B,-,A,A,B,B,A,A,A,B,A,A,A,A,B,A,B,B,A,A,B,B,A,A,A,A,B,B,-,A,A,B,-,B,A,B,B,B,-,B,A,A,A,A,A,A,A,B,A,A,B,B,B,A,-,B,A,A,A
S11_261144,,-,B,-,B,B,B,A,B,A,B,B,B,B,-,B,B,A,A,A,B,B,B,-,B,B,B,B,A,A,B,B,A,A,A,A,A,A,B,B,B,A,A,A,A,B,A,B,B,B,A,B,-,B,B,A,B,B,B,B,A,A,A,A,A,B,A,B,A,B,A,B,A,B,B,B,A,B,A,A,-,A,A,B,B,B,B,B,B,A,B,A,B,B,B,B,B,B,A,B,A,A,B,-,A,B,A,A,B,A,A,B,A,A,A,B,B,A,A,A,B,A,A,A,A,B,B,B,B,A,A,B,B,A,A,A,A,-,B,B,A,A,B,-,B,A,B,B,B,-,B,A,-,A,A,A,A,A,B,A,A,B,B,B,A,-,B,A,A,A
S11_271530,,-,B,-,B,B,B,A,B,A,B,B,B,B,-,B,B,A,A,A,B,B,B,A,B,B,B,B,A,A,B,B,A,A,A,A,A,A,B,B,B,A,A,A,A,B,A,B,B,B,A,B,-,B,B,A,B,B,B,B,A,A,A,-,A,B,A,B,A,B,A,B,A,B,-,B,A,B,A,A,B,A,A,B,B,B,B,B,B,A,B,A,B,B,B,B,B,B,A,B,B,A,B,-,A,B,A,A,B,A,A,A,-,A,A,B,B,A,A,A,B,A,A,A,A,B,B,B,B,A,A,B,B,A,A,A,A,-,B,B,A,A,B,-,B,A,B,B,B,-,B,A,A,A,A,A,A,A,B,A,A,B,B,B,A,-,B,A,A,A
S11_273364,,-,B,-,B,B,B,A,B,A,B,B,B,B,-,B,B,A,A,A,B,B,B,A,B,B,B,B,A,A,B,B,A,A,A,A,A,A,B,B,B,A,A,A,A,B,A,B,B,B,A,B,-,B,B,A,B,B,B,B,A,A,A,A,A,B,A,B,A,B,A,B,A,B,B,B,A,B,A,A,-,A,A,B,B,B,B,B,B,A,B,A,B,B,B,B,B,B,A,B,B,A,B,A,A,B,A,A,B,A,A,A,-,A,A,B,B,A,A,A,B,A,A,A,A,B,B,B,B,A,A,B,B,A,A,A,A,-,B,B,A,A,B,-,B,A,B,B,B,-,B,A,A,A,A,A,A,A,B,A,A,B,B,B,A,A,B,A,A,A
S11_313039,,-,B,-,B,B,B,A,B,A,B,B,B,B,-,B,B,A,A,A,B,B,B,-,B,B,B,B,A,A,B,B,A,A,A,A,A,A,B,B,B,A,A,B,A,B,A,B,B,B,A,B,-,B,B,A,B,B,B,B,A,A,A,A,A,B,A,B,A,B,A,B,A,A,-,B,A,B,A,A,-,A,A,B,B,B,B,B,B,A,B,A,B,B,B,B,B,B,A,B,B,B,B,-,A,B,A,A,B,A,A,A,-,A,A,B,B,A,A,A,B,A,B,A,A,B,B,B,B,A,A,B,B,A,A,A,-,-,B,B,A,A,B,-,B,A,B,B,B,-,B,A,A,A,A,A,A,A,B,A,B,B,B,B,A,-,B,A,A,A
S11_317807,,-,B,-,B,B,B,A,B,A,B,B,B,B,-,B,B,A,A,A,B,B,B,-,B,B,B,B,A,A,B,B,A,A,A,A,A,A,B,B,B,A,A,B,A,B,A,B,B,B,A,B,-,B,B,A,B,B,B,B,A,A,A,A,A,B,A,B,A,B,A,B,A,A,-,B,A,B,A,A,-,A,A,B,B,B,B,B,B,A,B,A,B,B,B,B,B,B,A,B,B,B,B,-,A,B,A,A,B,A,A,A,-,A,A,B,B,A,A,A,B,A,B,A,A,B,B,B,B,A,A,B,B,A,A,A,A,-,B,B,A,A,B,-,B,A,B,B,B,-,B,A,A,A,A,A,A,A,B,A,B,B,B,B,A,A,B,A,A,A
S11_370910,,-,B,-,B,B,B,A,B,A,B,B,A,B,-,B,B,A,A,A,B,B,B,-,B,B,B,B,A,A,B,B,A,A,A,A,A,A,B,B,B,A,A,B,A,B,A,B,B,B,A,B,-,B,B,A,B,B,B,B,A,A,A,-,A,B,A,B,A,B,A,B,A,A,B,B,A,B,A,A,B,A,A,B,B,B,B,B,B,A,B,A,B,B,B,B,B,B,A,B,B,B,B,A,A,B,A,A,B,A,A,A,A,A,A,B,B,A,A,A,B,A,B,A,A,B,B,B,B,A,A,B,B,A,A,A,A,-,B,B,A,A,B,-,B,A,B,B,B,-,B,A,A,A,A,A,A,A,B,A,B,B,B,B,A,-,B,A,A,A
S11_376793,,-,B,-,B,B,B,-,B,A,B,B,A,B,-,B,B,A,A,A,B,B,B,-,B,B,B,B,A,A,B,B,A,-,A,A,A,A,-,B,B,A,A,B,A,B,A,B,B,B,A,B,-,B,B,A,B,B,B,B,A,A,A,A,A,B,A,B,A,B,A,B,A,A,-,B,A,B,A,A,-,A,A,B,B,B,B,B,B,A,B,A,B,B,B,B,B,B,A,B,B,B,B,A,A,B,A,A,B,A,A,A,-,A,A,B,B,A,A,A,B,A,B,A,A,B,B,B,B,A,A,-,B,A,A,A,A,-,B,-,A,A,B,-,B,-,B,B,B,-,B,A,A,A,A,A,A,A,B,A,B,B,B,B,A,-,B,A,A,A
S11_380970,,-,B,-,B,B,B,-,B,A,B,B,-,B,B,B,B,A,A,A,B,B,B,-,B,B,B,B,A,A,B,B,A,A,A,A,A,A,-,B,B,A,A,B,A,B,A,B,B,B,A,B,-,B,B,A,B,B,B,B,A,-,A,-,A,B,A,B,A,B,A,B,A,A,B,B,A,B,A,A,-,A,A,B,B,B,B,B,B,A,B,A,B,B,B,B,B,B,A,B,B,B,B,A,A,B,A,A,B,A,A,A,-,A,A,B,B,A,A,A,B,A,B,A,A,B,B,B,B,A,A,B,B,A,A,A,-,-,B,B,A,A,B,-,B,A,B,B,B,-,B,A,A,A,A,A,A,A,B,A,B,B,B,B,A,-,B,A,A,A
S11_385006,,-,B,-,B,-,B,A,B,A,B,B,-,B,A,B,B,A,A,A,B,B,B,-,B,B,B,B,A,A,B,B,-,A,A,A,A,A,-,B,-,A,A,B,A,-,A,B,B,B,A,B,B,B,B,A,B,B,B,B,A,-,A,-,A,B,A,B,A,B,A,B,-,A,-,B,A,B,A,A,-,A,A,B,B,B,B,B,-,A,B,-,B,B,B,B,-,-,A,B,-,B,B,A,A,-,A,A,B,A,A,A,-,A,A,-,B,A,A,-,-,A,B,A,A,B,B,B,B,A,A,B,B,A,A,A,-,-,B,-,A,A,B,-,B,A,B,B,B,-,B,A,-,A,A,A,A,A,-,A,B,B,B,B,A,-,B,A,A,A
S11_394786,,-,B,-,B,B,B,A,B,A,-,B,A,B,B,B,B,A,A,A,B,B,B,-,B,B,B,B,-,A,B,B,A,A,A,A,A,A,-,B,B,A,A,B,A,-,A,B,B,B,A,-,-,B,B,A,B,B,B,B,A,A,A,-,A,B,A,B,A,B,A,-,-,A,-,B,A,B,A,A,B,A,A,B,B,-,B,B,B,A,B,A,B,B,B,B,B,B,A,B,B,B,B,A,A,B,A,A,B,A,A,A,-,A,A,B,B,A,A,A,-,A,B,A,A,B,B,-,B,A,A,B,-,A,A,A,A,-,B,-,A,A,B,-,B,A,B,B,B,-,B,A,A,A,A,A,A,A,B,A,B,B,B,-,A,-,B,A,A,-
S11_444470,,-,B,-,B,B,B,A,B,A,-,B,A,B,-,B,B,A,A,A,B,B,B,B,B,B,B,B,A,A,B,B,A,A,A,A,A,A,B,B,B,A,A,B,A,B,A,B,B,B,A,B,-,B,B,A,B,B,B,B,A,A,A,-,A,B,A,B,A,B,A,B,A,A,B,B,A,B,A,A,-,A,A,B,B,B,B,B,B,A,B,A,B,B,B,B,B,B,A,B,B,B,B,-,A,B,A,A,B,A,A,A,-,A,A,B,B,A,A,A,B,A,B,A,A,B,B,B,B,A,A,B,B,A,A,A,A,-,B,B,A,A,B,-,B,A,B,B,B,-,B,A,A,A,A,A,A,A,A,A,B,B,B,B,A,-,B,A,A,A
S11_450386,,-,B,-,B,B,B,A,B,A,-,B,A,B,-,B,B,A,A,A,B,B,B,B,B,B,B,B,A,A,B,B,A,A,A,A,A,A,B,B,B,A,A,B,A,B,A,B,B,B,A,B,-,B,B,A,B,B,B,B,A,A,A,A,A,B,A,B,A,B,A,B,A,A,B,B,A,B,A,A,B,A,A,B,B,B,B,B,B,A,B,A,B,B,B,B,B,B,A,B,B,B,B,-,A,B,A,A,B,A,A,A,-,A,A,B,B,A,A,A,B,A,B,A,A,B,B,B,B,A,A,B,B,A,A,A,A,-,B,B,A,A,B,-,B,A,B,-,B,-,B,A,A,A,A,A,A,A,A,A,B,B,B,B,A,-,B,A,A,A
S11_462584,,-,B,-,B,B,B,A,B,A,-,B,A,B,-,B,B,A,A,A,B,B,B,-,B,B,B,B,A,A,B,B,A,A,A,A,A,A,B,B,B,A,A,B,A,B,A,B,B,B,A,B,-,B,B,A,B,B,B,B,A,A,A,A,A,B,A,B,A,B,A,B,A,A,-,B,A,B,A,A,B,A,A,B,B,B,B,B,B,A,B,A,B,B,B,B,B,B,A,B,B,B,B,-,A,B,A,A,B,A,A,A,-,A,A,B,B,A,A,A,B,A,B,A,A,B,B,B,B,A,A,B,B,A,A,A,A,-,B,B,A,A,B,-,B,A,B,-,B,-,B,A,A,A,A,A,A,A,A,A,B,B,B,B,A,-,B,A,A,A
S11_466573,,-,B,-,B,B,B,A,B,A,-,B,A,B,-,B,B,A,A,A,B,B,B,B,B,B,B,B,A,A,B,B,A,A,A,A,A,A,B,B,B,A,A,B,A,B,A,B,B,B,A,B,-,B,B,A,B,B,B,B,A,A,A,A,A,B,A,B,A,B,A,B,A,A,B,B,A,B,A,A,-,A,A,B,B,B,B,B,B,A,B,A,B,B,B,B,B,B,A,B,B,B,B,-,A,B,A,A,B,A,A,A,-,A,A,B,B,A,A,A,B,A,B,A,A,B,B,B,B,A,A,B,B,A,A,A,A,-,B,B,A,A,B,-,B,A,B,-,B,-,B,A,A,A,A,A,A,A,A,A,B,B,B,B,A,-,B,A,A,A
S11_491894,,-,B,-,B,-,B,A,B,A,A,B,A,B,A,-,B,A,A,A,A,B,B,-,B,B,B,B,A,A,-,B,A,A,A,B,A,A,-,B,B,A,A,-,A,-,-,B,B,B,A,-,-,B,B,A,B,B,B,B,A,A,A,-,A,B,A,B,A,B,A,B,A,A,-,B,A,B,A,A,-,A,A,B,-,B,B,B,B,A,B,-,B,B,B,B,B,B,A,B,-,B,B,-,A,B,A,A,B,A,A,A,-,A,A,B,-,A,A,A,B,A,B,-,A,B,B,B,-,A,A,-,B,A,A,A,-,A,B,-,A,A,B,-,B,-,B,-,B,-,B,A,A,A,A,A,A,A,-,A,B,B,B,B,A,-,B,A,A,-
S11_526923,,-,A,-,B,B,B,A,B,B,B,B,A,B,-,B,B,A,A,A,-,B,B,B,B,B,B,B,A,A,B,B,A,A,A,B,A,A,B,B,B,A,A,B,A,B,A,B,B,B,A,B,-,B,B,A,B,B,B,B,A,A,A,-,A,B,A,B,A,B,A,B,A,A,-,B,A,B,A,A,B,A,A,B,B,B,B,B,B,A,B,A,B,B,B,B,B,B,A,B,B,B,B,A,A,B,A,A,B,A,A,A,A,A,A,B,B,A,A,A,B,A,B,A,A,B,B,B,B,A,A,B,B,A,A,A,A,A,B,A,A,A,B,-,B,A,B,A,B,B,B,A,A,A,A,A,A,A,A,A,B,B,B,B,A,A,B,A,A,A
S11_532829,,-,-,-,B,B,B,A,B,-,-,B,A,B,-,-,B,A,A,A,-,-,B,-,B,B,B,B,-,A,B,-,A,-,A,B,A,-,B,B,B,A,A,B,A,-,A,B,B,B,A,B,-,B,B,A,B,B,B,B,A,A,A,-,A,B,A,B,A,B,A,-,-,A,B,B,-,B,A,A,-,A,A,B,B,B,B,B,B,A,B,A,B,B,B,B,B,B,-,B,B,B,B,A,-,B,A,A,B,A,A,A,-,A,A,B,B,A,A,A,B,A,B,-,A,B,B,B,-,A,A,B,B,A,A,-,-,A,B,-,A,A,B,-,B,A,B,A,B,-,B,A,-,A,A,-,A,A,A,A,B,B,B,B,A,-,B,A,A,-
S11_536391,,-,A,-,B,B,B,A,B,B,B,B,A,B,-,-,B,A,A,A,A,B,B,-,B,B,B,-,A,A,B,B,A,A,A,B,A,A,-,B,B,A,A,B,A,-,A,B,B,B,A,B,-,B,B,A,B,B,-,B,A,A,A,-,A,B,A,B,A,B,A,B,A,A,-,B,A,B,A,A,B,A,A,B,B,B,B,B,B,A,B,A,-,B,B,-,B,-,A,B,B,B,B,A,A,B,A,A,-,A,A,A,-,A,A,B,B,A,A,A,-,A,B,A,A,B,B,B,B,A,A,B,B,A,A,A,A,A,-,-,A,A,B,-,B,A,B,A,B,-,B,A,-,A,A,A,A,A,A,A,B,B,B,B,A,-,B,A,A,A
S11_537488,,-,A,-,B,-,B,A,B,B,B,B,A,B,A,B,B,A,A,A,B,B,B,-,B,B,B,B,-,A,-,B,-,-,A,-,A,A,-,B,B,-,A,B,A,-,A,B,B,B,A,B,B,B,B,A,B,B,B,B,A,A,A,-,A,B,A,B,A,B,A,B,A,-,-,B,A,B,A,A,-,A,A,B,B,B,B,B,B,A,B,-,B,B,B,-,B,-,A,B,B,B,B,A,-,B,A,A,B,A,A,A,-,A,A,B,-,A,A,A,-,A,B,A,A,B,B,B,B,-,A,B,B,A,A,A,-,A,B,-,A,A,B,-,B,A,B,A,B,-,B,A,A,A,A,A,-,A,-,A,B,B,B,-,A,-,B,A,A,A
S11_578662,,-,A,-,B,B,B,A,B,B,B,B,A,B,-,B,B,A,A,A,B,B,B,B,B,B,B,B,A,A,B,B,A,A,A,B,A,A,B,B,B,A,A,B,A,B,A,B,B,B,A,B,-,B,B,A,B,B,B,B,A,A,A,A,A,B,A,B,A,B,A,B,A,A,-,B,A,B,A,A,-,A,A,B,B,B,B,B,B,A,B,A,B,B,B,B,B,B,A,B,B,B,B,A,A,B,A,A,B,A,A,A,-,A,A,B,B,A,A,A,B,A,B,A,A,B,B,B,B,A,A,B,B,A,A,A,A,A,B,A,A,-,B,-,B,A,B,A,B,-,B,A,A,A,A,A,A,A,A,A,B,B,B,B,A,A,B,A,A,A
S11_626453,,-,A,-,B,B,B,A,B,B,B,B,A,B,-,B,B,A,A,A,B,B,B,-,B,B,B,B,A,A,B,B,A,A,A,B,A,A,B,B,B,A,A,B,A,B,A,B,B,B,A,B,-,B,B,A,B,B,B,B,A,A,A,A,A,B,A,B,A,B,A,B,A,A,-,B,A,B,A,A,B,A,A,B,B,B,B,B,B,A,B,A,B,B,B,B,B,B,A,B,B,B,B,A,A,B,A,A,B,A,A,A,-,A,A,B,B,A,A,A,B,A,B,A,A,B,B,B,B,A,A,B,B,A,A,A,A,A,B,A,A,-,B,-,B,A,B,A,B,-,B,A,A,A,A,A,A,A,A,A,B,B,B,B,A,-,B,A,A,A
S11_655301,,-,A,-,B,B,B,A,B,B,B,B,A,B,-,B,B,A,A,A,-,B,B,B,B,B,B,B,A,A,B,B,A,A,A,A,A,A,B,B,B,A,A,B,A,B,A,B,B,B,A,B,-,B,B,A,B,B,B,B,A,A,A,A,A,B,A,B,A,B,A,B,A,A,-,B,A,B,A,A,-,A,A,B,B,B,B,B,B,A,B,A,B,B,B,B,B,B,A,B,B,B,B,A,A,B,A,A,B,A,A,A,-,A,A,B,B,A,A,A,B,A,B,A,A,B,B,B,B,A,A,B,B,A,A,A,A,B,B,A,A,-,B,-,B,-,B,A,B,-,B,A,A,A,A,A,A,A,A,A,B,B,B,B,A,-,B,A,A,A
S11_660846,,-,A,-,B,B,B,A,B,B,B,B,A,B,A,B,B,A,A,A,-,B,B,B,B,B,B,B,-,A,B,B,A,A,A,A,A,A,B,B,B,A,A,B,A,-,A,B,B,B,A,B,-,B,B,A,B,B,B,B,A,A,A,-,A,B,A,B,A,B,A,B,A,A,B,B,A,B,A,A,-,A,A,B,B,B,B,B,B,A,B,A,B,B,B,B,B,B,A,B,-,B,B,A,A,B,A,A,B,A,A,-,-,A,A,B,B,A,A,A,B,A,B,A,A,B,B,B,B,A,A,B,B,A,A,A,-,B,B,-,A,-,B,-,B,A,B,A,B,-,B,A,A,A,A,A,A,A,A,A,B,B,B,B,A,-,B,A,A,A
S11_684943,,A,A,-,B,B,B,A,B,B,B,B,A,B,-,B,B,A,A,A,-,B,B,-,B,B,B,B,A,A,B,B,A,A,A,A,A,A,-,B,B,A,A,B,A,B,A,B,B,B,A,B,-,B,B,A,B,B,B,B,A,A,A,A,A,B,A,B,A,B,A,B,A,A,B,B,A,B,A,A,-,A,A,B,B,B,B,B,B,A,B,A,B,B,B,B,B,B,A,B,B,B,B,A,A,B,A,A,B,A,A,A,-,A,A,B,B,A,A,A,B,A,B,A,A,B,B,B,A,A,A,B,B,A,A,A,A,B,B,-,A,-,B,-,B,A,B,A,B,-,B,A,A,A,A,A,A,A,A,A,B,B,B,B,A,-,B,A,A,A
S12_38577,,-,B,-,A,-,A,A,A,A,A,B,-,B,A,-,B,-,B,A,B,-,B,-,A,B,-,A,A,A,B,B,-,B,B,A,-,B,-,B,B,A,B,A,A,-,B,A,B,B,B,B,B,A,A,B,A,B,A,B,A,-,A,-,A,A,A,A,-,A,A,B,A,B,-,B,A,A,A,B,-,A,B,A,A,A,A,A,A,A,-,A,A,A,B,A,B,B,A,B,-,A,A,A,A,B,A,A,A,B,A,A,-,A,B,B,-,A,A,A,B,B,A,A,B,B,A,B,A,B,A,B,B,B,A,B,-,A,-,-,A,A,B,-,A,B,A,A,A,-,B,B,A,B,A,B,B,B,-,-,B,A,B,A,B,-,A,B,A,B
S12_53168,,-,B,-,A,A,A,A,A,A,A,B,-,B,A,A,B,B,B,A,B,B,B,B,A,B,B,A,A,A,B,B,A,B,B,A,B,B,B,B,B,A,B,A,A,-,B,A,B,B,B,B,B,A,A,B,A,B,A,B,A,B,A,B,A,A,A,A,B,A,A,B,A,B,B,-,B,A,A,B,-,A,B,A,A,A,A,A,A,A,B,A,A,A,B,A,B,B,A,B,A,A,A,A,A,B,-,A,A,B,A,-,-,A,B,B,B,A,A,A,B,B,A,A,B,B,A,B,A,B,A,B,B,B,A,B,B,A,A,-,A,-,B,-,A,B,A,A,A,-,B,B,A,B,A,B,B,B,A,B,B,A,B,A,B,-,A,B,A,B
S12_77902,,-,B,-,A,A,A,A,A,A,A,B,A,B,A,-,B,B,-,A,B,B,B,B,A,B,B,A,A,-,B,B,-,-,B,A,B,B,-,B,B,A,B,A,A,A,B,A,B,B,B,B,B,A,A,-,A,B,A,B,A,B,A,-,A,A,A,-,B,A,A,B,A,B,B,A,B,A,A,B,-,A,B,A,A,A,A,-,A,A,-,-,A,-,B,-,B,-,A,B,A,A,A,A,A,B,A,A,A,B,A,-,-,A,B,B,B,A,B,A,B,B,A,A,B,B,A,B,A,B,A,B,B,B,-,B,-,A,A,-,A,-,B,-,A,B,A,A,A,-,B,B,A,B,A,B,B,B,A,-,B,A,B,A,B,-,A,B,A,B
S12_87750,,-,B,A,A,A,A,A,A,A,A,B,A,B,A,A,B,B,B,A,B,B,B,B,A,B,B,A,A,A,B,B,A,B,B,A,B,B,B,B,B,A,B,A,A,A,B,A,B,B,B,B,B,A,A,B,A,B,A,B,A,B,A,B,A,A,A,A,B,A,A,B,A,B,B,A,B,A,A,B,B,A,B,A,A,A,A,A,A,A,-,A,A,A,B,A,B,B,A,B,A,A,A,A,A,B,A,A,A,B,A,A,-,A,B,B,B,A,B,A,B,B,A,A,B,B,A,B,A,B,A,B,B,B,A,B,B,A,A,A,A,-,B,-,A,B,A,A,A,B,B,B,A,B,A,B,A,B,A,-,B,A,B,A,B,-,A,B,A,A
S12_121545,,-,B,-,A,A,A,-,A,A,-,B,-,A,B,-,B,B,-,A,A,B,B,-,A,B,B,A,-,A,B,B,A,B,B,A,B,-,B,A,A,A,A,B,B,A,B,A,A,B,A,B,B,B,A,B,A,B,A,B,B,-,A,-,A,B,-,B,A,A,B,B,A,A,-,A,A,B,A,B,-,A,A,B,B,A,-,B,A,A,A,A,A,A,B,-,B,B,A,A,B,B,B,A,A,B,A,A,A,A,A,B,-,B,A,B,-,A,B,A,A,A,A,B,B,B,A,B,B,B,A,B,A,B,A,A,B,A,A,-,B,A,A,-,-,B,B,A,A,-,A,B,A,A,B,B,A,B,A,B,A,A,B,A,A,A,A,B,A,B
S12_134978,,B,B,-,A,A,A,A,B,A,A,B,-,B,A,-,B,B,B,A,B,B,B,B,A,B,B,A,A,A,B,-,A,B,B,A,B,B,-,B,A,A,B,A,A,-,B,A,B,B,B,B,B,A,A,B,A,B,A,B,A,B,A,B,A,A,A,A,B,A,A,B,A,B,-,A,B,A,A,B,-,A,B,A,A,A,A,A,A,A,-,A,A,A,B,A,B,B,A,B,A,A,A,A,-,B,A,A,A,B,A,A,-,A,B,B,B,A,B,A,B,B,A,A,B,B,A,B,A,-,A,B,A,B,A,B,-,A,A,A,A,-,B,-,A,-,A,A,A,-,B,B,A,A,A,B,A,B,-,A,B,A,B,A,B,-,A,B,A,A
S12_151324,,-,B,-,A,A,A,-,-,A,A,B,A,B,A,-,B,B,B,A,B,B,B,-,A,B,B,A,-,A,B,B,A,-,B,A,B,-,B,B,A,A,B,A,A,A,B,A,-,B,B,B,B,A,A,-,-,B,A,B,A,B,A,-,A,A,A,A,B,A,A,B,A,B,B,-,B,A,A,-,-,A,B,A,A,-,A,A,A,A,-,-,A,-,B,A,B,-,A,B,A,B,A,A,A,B,-,A,A,B,A,-,-,A,B,B,B,-,B,A,B,B,A,A,B,B,A,B,A,-,A,-,A,B,A,B,B,A,A,-,A,-,B,-,A,B,A,A,A,-,-,B,A,A,A,B,A,B,A,A,-,A,B,A,B,-,-,B,A,A
S12_164289,,-,B,-,A,A,A,A,B,-,-,B,A,B,A,-,B,B,B,A,B,B,B,-,A,B,B,A,-,A,B,B,A,-,B,A,B,B,-,A,A,A,B,A,A,A,B,A,B,B,B,B,B,A,A,B,A,B,A,B,A,B,A,B,A,A,A,A,B,A,A,B,-,B,-,A,B,A,A,B,-,A,B,A,-,A,A,A,A,A,-,A,A,A,B,A,B,B,A,B,A,B,A,A,A,B,A,A,A,B,A,A,-,A,B,B,B,A,B,A,B,B,A,A,B,B,A,B,A,B,A,B,A,B,A,B,-,A,A,-,A,-,B,-,A,B,A,A,A,-,B,B,A,A,A,B,A,B,A,A,B,A,B,A,B,-,A,B,A,-
S12_170277,,-,B,-,A,A,A,A,B,A,A,B,A,B,A,A,B,B,B,A,B,B,B,B,A,B,B,A,A,A,B,B,A,B,B,A,B,B,B,A,A,A,B,A,A,A,B,A,B,B,B,B,B,A,A,B,A,B,A,B,A,B,A,-,A,A,A,A,B,A,A,B,A,B,-,A,B,A,A,B,A,A,B,A,A,A,A,A,A,A,-,A,A,A,B,A,B,B,A,B,A,B,A,A,A,B,A,A,A,B,A,A,-,A,B,B,B,A,B,A,B,B,A,A,B,B,A,B,A,B,A,B,A,B,A,B,B,A,A,B,A,-,B,-,A,B,A,A,A,-,B,B,A,A,-,B,A,B,A,A,B,A,B,A,B,-,A,B,A,A
S12_171509,,-,B,-,A,A,A,A,B,A,A,B,A,B,A,A,B,B,B,A,B,B,B,-,A,B,B,A,A,A,B,B,A,B,B,A,B,B,B,A,A,A,B,A,A,A,B,A,B,B,B,B,B,A,A,B,A,B,A,B,A,B,A,B,A,A,A,A,B,A,A,B,A,B,-,A,B,A,A,B,-,A,B,A,A,A,A,A,A,A,-,A,A,A,B,A,B,B,A,B,A,B,A,A,A,B,A,A,A,B,A,A,B,A,B,B,B,A,B,A,B,B,A,A,B,B,A,B,A,B,A,B,A,B,A,B,B,A,A,-,A,-,B,-,A,B,A,A,A,-,B,B,A,A,-,B,A,B,A,A,B,A,B,A,B,-,A,B,A,A
S12_181437,,-,B,-,A,A,A,A,B,A,A,B,A,B,A,A,B,B,B,A,B,B,B,-,A,B,B,A,A,A,B,B,A,B,B,A,B,B,B,A,A,A,B,A,A,A,B,A,B,B,B,B,B,A,A,B,A,B,A,B,A,B,A,B,A,A,A,A,B,A,A,B,A,B,-,A,B,A,A,B,-,A,B,A,A,A,A,A,A,A,-,A,A,A,B,A,B,B,A,B,A,B,A,A,A,B,A,A,A,B,A,A,-,A,B,B,B,A,B,A,B,B,A,A,B,B,A,B,A,B,A,B,A,B,A,B,-,A,A,B,A,-,B,-,A,-,A,A,A,-,B,B,A,A,-,B,A,B,A,A,B,A,B,A,B,-,A,B,A,A
S12_191657,,-,B,-,A,-,A,A,B,A,A,B,A,B,A,A,B,-,B,A,B,B,B,-,A,B,-,A,A,A,B,B,A,B,B,A,B,B,-,A,A,A,B,A,A,A,B,A,B,B,B,B,B,A,A,B,A,B,A,B,A,B,A,-,A,A,A,A,B,A,A,B,A,B,-,A,B,A,A,B,A,A,B,A,A,A,A,A,A,A,-,A,A,A,B,A,B,B,A,B,A,B,A,A,A,B,A,A,A,B,A,A,B,A,B,B,B,A,B,A,B,B,A,A,B,B,A,B,A,-,A,B,A,B,A,B,B,A,-,A,A,-,B,-,A,B,A,A,A,-,B,B,A,A,A,B,A,B,-,A,B,A,B,A,B,-,A,B,A,A
S12_199381,,-,B,-,A,-,A,A,B,A,A,B,A,B,A,A,B,B,B,A,B,B,B,-,A,B,B,A,A,A,B,B,A,B,B,A,B,B,B,A,A,A,B,A,A,-,B,A,B,B,B,B,B,A,A,B,A,B,A,B,A,B,A,B,A,A,A,A,B,A,A,B,A,B,B,A,B,A,A,B,-,A,B,A,A,A,A,A,A,A,B,-,A,A,B,A,B,B,A,B,A,B,A,A,A,B,A,A,A,B,A,A,-,A,B,B,B,A,B,A,B,B,A,A,B,B,A,B,A,B,A,B,A,B,A,B,-,A,A,-,A,-,B,-,A,B,A,A,A,-,B,B,-,A,-,B,A,B,A,A,B,A,B,A,B,-,A,B,A,A
S12_231221,,-,B,-,A,A,A,A,B,A,A,B,A,B,A,A,B,B,B,A,B,B,B,B,A,B,B,A,A,A,B,B,A,B,B,A,B,B,-,A,A,A,B,A,A,A,B,A,B,B,B,B,B,A,A,B,A,B,A,B,A,B,A,-,A,A,A,A,B,A,A,B,A,B,-,A,B,A,A,B,-,A,B,A,A,A,A,A,A,A,-,A,A,A,B,A,B,B,A,B,A,B,A,A,A,B,A,A,A,B,A,A,A,A,B,B,B,A,B,A,B,B,A,A,B,B,A,B,A,B,A,B,A,B,A,B,B,A,A,-,A,-,B,-,A,-,A,A,A,A,B,B,A,A,-,B,A,B,A,A,B,A,B,A,B,-,A,B,A,A
S12_302347,,-,B,-,A,A,A,B,B,A,A,B,A,B,B,A,B,B,B,A,B,B,B,B,A,B,B,A,A,A,B,B,A,B,B,A,B,B,B,A,A,A,B,A,A,A,B,A,B,B,B,B,B,A,A,B,A,B,A,B,A,B,A,B,A,A,A,A,B,A,A,B,A,B,-,A,B,A,A,B,A,A,B,A,A,A,A,A,A,A,-,A,A,A,B,A,B,B,A,B,B,B,A,A,A,B,A,A,A,B,A,B,-,A,B,B,B,A,B,A,B,B,A,A,B,B,A,B,A,B,A,B,A,B,A,B,B,A,A,A,A,-,B,-,A,B,A,A,B,A,B,B,A,A,-,B,A,B,A,A,B,A,B,A,B,-,A,B,A,A
S12_307632,,-,B,A,A,A,A,B,B,A,A,B,A,B,B,A,B,B,B,A,B,B,B,B,A,B,B,A,A,A,B,B,A,B,B,A,B,B,B,A,A,A,B,A,A,A,B,A,B,B,B,B,B,A,A,B,A,B,A,B,A,B,A,B,A,A,A,A,B,A,A,B,A,B,-,A,B,A,A,B,A,A,B,A,A,A,A,A,A,A,-,A,A,A,B,A,B,B,A,B,B,B,A,A,A,B,A,A,A,B,A,B,-,A,B,B,B,A,B,A,B,B,A,A,B,B,A,B,A,B,A,B,A,B,A,B,B,A,A,-,A,-,B,-,A,B,A,A,B,-,B,B,A,A,-,B,A,B,A,A,B,A,B,A,B,-,A,B,A,A
S12_335321,,-,B,-,A,-,A,B,B,A,A,B,-,B,B,-,B,B,B,-,B,B,B,-,A,B,B,A,A,A,B,B,A,B,B,A,B,B,-,A,A,A,B,A,A,-,B,A,-,B,B,B,B,A,A,B,A,B,A,B,A,B,A,-,A,A,A,A,B,-,A,B,A,B,-,A,B,A,A,B,-,A,B,A,A,A,A,-,A,A,B,-,A,A,B,A,B,B,A,B,B,B,A,A,A,B,A,A,A,B,A,B,-,A,B,B,B,A,B,A,B,B,A,A,B,B,A,B,A,B,A,B,A,B,A,-,-,A,A,B,A,-,B,-,A,-,A,A,B,-,B,B,A,A,A,B,-,B,A,A,B,A,B,A,B,-,A,B,A,A
S12_336773,,A,B,-,A,A,A,B,B,A,A,B,A,B,B,A,B,B,B,A,B,B,B,-,A,B,B,A,A,A,B,B,A,B,B,A,B,B,B,A,A,A,B,A,A,A,B,A,B,B,B,B,B,A,A,B,A,B,A,B,A,B,A,B,A,A,A,A,B,A,A,B,A,B,-,A,B,A,A,B,A,A,B,A,A,A,A,A,A,A,-,A,A,A,B,A,B,B,A,B,B,B,A,A,A,B,A,A,A,B,A,B,-,A,B,B,B,A,B,A,B,B,A,A,B,B,A,B,A,B,A,B,A,B,A,B,B,A,A,B,A,-,B,-,A,B,A,A,B,A,B,B,A,A,A,B,A,B,A,A,B,A,B,A,B,-,A,B,A,A
S12_348310,,-,B,-,-,A,A,B,B,A,A,B,-,B,B,A,B,B,B,A,B,B,B,-,A,B,B,A,-,A,B,B,-,-,B,A,B,B,B,A,A,A,B,A,A,A,B,A,B,B,B,B,B,A,A,B,A,B,A,B,A,B,A,-,A,A,-,A,B,A,A,B,-,A,-,A,B,A,A,B,-,A,B,A,A,A,A,-,-,A,-,-,A,A,B,A,B,B,A,B,B,B,A,A,A,B,A,A,A,B,A,B,-,A,B,B,B,A,B,A,B,B,A,A,B,B,A,B,A,-,A,B,A,B,A,B,-,A,-,-,A,A,B,-,A,B,A,A,B,-,B,B,-,A,-,A,A,B,-,A,B,A,B,A,B,-,A,B,A,A
S12_422439,,-,B,-,-,-,A,B,B,A,A,B,A,B,B,-,B,B,B,A,B,B,B,-,A,B,B,A,A,A,B,B,A,B,B,A,B,B,-,A,A,A,B,A,A,A,B,A,B,B,B,B,B,A,A,B,A,B,A,B,A,B,A,-,A,A,A,A,B,A,A,B,A,A,-,A,A,A,A,B,-,A,B,A,A,A,A,A,A,A,-,A,A,A,B,A,B,B,A,A,B,B,A,A,A,B,A,A,A,B,A,-,-,A,B,B,B,A,B,A,B,B,A,A,B,B,A,B,A,-,A,B,A,B,A,B,B,A,A,-,A,-,B,-,A,-,A,A,A,-,B,B,A,A,A,A,A,B,-,A,B,A,-,A,B,-,A,A,A,A
S12_449911,,B,B,-,A,A,A,B,B,A,A,B,A,B,B,A,B,B,B,A,B,B,B,-,A,B,B,A,A,A,B,B,A,B,B,A,B,B,B,A,A,A,B,A,A,A,B,A,B,B,B,B,B,A,A,B,A,B,B,B,A,B,A,B,A,A,A,A,B,A,A,B,A,A,B,A,A,A,A,B,-,A,B,A,A,A,A,A,A,A,-,A,A,A,B,A,B,B,A,A,B,B,A,A,A,B,A,A,A,B,A,B,-,A,B,B,B,A,B,A,B,B,A,A,B,B,A,B,A,B,A,B,A,B,A,B,B,A,A,A,B,-,B,-,A,-,A,A,A,-,B,B,A,A,A,A,A,B,A,A,B,A,B,A,B,-,A,A,A,A
S12_451092,,B,B,-,A,A,A,B,B,A,A,B,A,B,B,-,B,B,B,A,B,B,B,-,A,B,B,A,A,A,B,B,A,B,B,A,B,B,B,A,A,A,B,A,A,A,B,A,B,B,B,B,B,A,A,B,A,B,B,B,A,B,A,-,A,A,A,A,B,A,A,B,A,A,-,A,A,A,A,B,A,A,B,A,A,A,A,A,A,A,-,A,A,A,B,A,B,B,A,A,B,B,A,A,A,B,A,A,A,B,A,B,-,A,B,B,B,A,B,A,B,B,A,A,B,B,A,B,A,-,A,B,A,B,A,B,-,A,A,-,B,-,B,-,A,-,A,A,A,-,B,B,-,A,A,A,A,B,A,A,B,A,B,A,B,A,A,A,A,A
S12_468082,,-,B,A,A,A,A,B,B,A,A,B,A,B,B,A,B,B,B,A,B,B,B,B,A,B,B,A,A,A,B,B,A,B,B,A,B,B,B,A,A,A,B,A,A,A,B,A,B,B,B,B,B,A,A,B,A,B,B,B,A,B,A,B,A,A,A,A,B,A,A,B,A,A,B,A,A,A,A,B,A,A,B,A,A,A,A,B,A,A,-,A,A,A,B,A,B,B,A,A,B,B,A,A,A,B,A,A,A,B,A,B,-,A,B,B,B,B,B,A,B,B,A,A,B,B,A,B,A,B,A,B,A,B,A,B,B,A,A,-,B,-,B,-,A,-,A,A,A,A,B,B,A,A,-,A,A,B,A,A,B,A,B,A,B,-,A,A,A,A
S12_472276,,-,B,-,A,A,A,B,B,A,A,B,A,B,B,A,B,B,B,A,B,B,B,-,A,B,B,A,A,A,B,B,A,B,B,A,B,B,B,A,A,A,B,A,A,A,B,A,B,B,B,B,B,A,A,B,A,B,B,B,A,B,A,-,A,A,A,A,B,A,A,B,A,A,-,A,A,A,A,B,A,A,B,A,A,A,A,B,A,A,-,A,A,A,B,A,B,B,A,A,B,-,A,A,A,B,A,A,A,B,A,B,-,A,A,B,B,B,B,A,B,B,A,A,B,B,A,B,A,-,A,B,A,B,A,B,B,A,A,B,B,A,B,-,A,A,A,A,A,-,B,B,A,A,A,A,A,B,A,A,B,A,B,A,B,-,A,A,A,A
S12_501850,,-,B,-,A,A,A,-,B,A,A,B,-,B,B,A,B,B,-,A,B,B,B,B,A,-,B,A,A,A,B,B,A,B,B,-,B,B,B,A,A,A,B,A,A,A,B,A,B,B,B,B,-,A,A,B,A,B,B,B,A,-,A,-,A,A,-,A,B,A,A,B,A,A,-,A,A,A,A,-,-,A,B,A,A,A,A,B,A,-,B,-,A,A,-,-,B,-,A,A,B,B,A,A,A,B,A,A,A,B,A,-,-,A,A,B,B,B,B,A,B,B,A,A,B,B,A,B,A,B,A,B,A,B,A,B,-,A,A,-,B,-,B,-,A,-,A,A,A,-,B,B,A,A,A,A,A,B,A,A,B,A,B,A,B,-,A,A,A,A
S12_529142,,-,B,-,A,A,A,-,B,A,A,B,A,B,B,A,B,B,B,A,B,B,B,-,A,B,B,A,A,A,B,B,A,B,B,A,B,B,B,A,A,A,B,A,A,A,B,A,B,B,B,B,B,A,A,B,A,B,B,B,A,B,A,B,A,A,A,A,B,A,A,B,A,A,-,A,A,A,A,B,-,B,B,B,A,A,A,B,A,A,-,A,A,A,B,A,B,B,A,A,B,B,A,A,A,B,A,A,A,B,A,B,-,A,A,B,B,B,B,A,B,B,A,A,B,B,A,B,A,B,A,B,A,B,A,B,B,A,A,B,B,-,B,-,A,-,A,A,A,-,B,B,A,A,A,A,A,B,A,A,B,A,B,A,B,-,A,A,A,A
S12_680684,,-,B,-,A,A,A,B,-,A,A,B,A,B,B,A,B,B,B,A,-,B,B,-,A,B,A,A,A,A,-,B,A,B,B,A,B,-,-,A,A,A,A,A,A,A,B,A,B,B,B,-,B,B,A,B,A,B,B,-,A,B,A,B,A,A,-,A,B,A,A,B,A,A,-,A,A,A,A,B,A,-,-,B,A,A,A,B,A,A,-,A,A,A,B,A,B,B,A,A,B,B,A,A,A,B,A,A,A,B,A,B,-,A,A,B,B,B,B,A,-,B,A,A,B,B,A,B,A,-,A,B,A,B,A,B,-,A,A,A,B,A,B,-,A,B,A,B,A,-,B,B,A,A,A,A,A,B,A,A,B,A,B,A,B,-,A,A,A,A
S12_718163,,-,B,-,A,A,A,-,B,A,A,B,A,B,B,A,B,B,B,A,B,A,B,B,A,B,A,A,A,A,B,B,A,B,B,A,B,B,B,A,A,A,A,A,A,A,B,A,B,B,B,B,B,B,A,B,A,B,B,B,A,B,A,-,A,A,A,A,A,A,A,B,A,A,B,A,A,A,A,B,-,B,B,B,A,A,A,B,-,A,B,-,B,A,B,A,B,-,A,A,B,B,A,-,A,B,A,A,A,B,A,B,-,B,A,B,B,B,B,A,B,B,A,A,B,B,A,B,A,B,A,B,A,B,A,B,B,A,A,A,A,-,B,-,A,B,A,B,A,-,A,B,A,A,A,A,A,-,A,A,B,A,B,A,B,-,A,A,A,A
S12_810633,,-,B,-,A,-,A,-,B,A,A,B,-,B,B,-,B,B,B,A,B,A,B,-,A,B,A,A,A,A,B,B,A,B,B,A,B,B,-,A,A,A,A,A,A,-,B,A,B,B,B,B,B,B,A,B,A,B,B,-,A,B,A,-,A,-,-,A,A,A,A,B,A,A,-,A,A,A,A,B,-,B,-,B,A,A,A,-,A,A,B,A,B,A,-,A,B,B,A,A,B,B,A,-,A,B,A,A,-,B,A,B,-,B,A,-,B,B,B,A,-,B,A,A,B,B,A,B,A,-,A,B,A,B,A,B,-,A,A,-,A,-,B,-,A,B,A,B,A,-,A,B,A,A,A,A,A,B,A,B,B,A,B,A,A,-,A,A,A,A
S12_820386,,-,B,-,A,A,A,B,B,A,A,B,A,B,B,-,B,B,B,A,B,-,B,-,A,B,A,A,A,A,B,B,A,B,B,A,B,B,B,A,A,A,A,A,A,A,B,A,B,B,B,B,B,B,A,B,A,B,B,B,A,B,A,B,A,A,A,A,A,A,A,B,A,A,B,A,A,A,A,B,-,B,B,B,A,A,A,B,A,A,B,A,B,A,B,A,B,B,A,A,B,B,A,-,A,B,A,A,A,B,A,B,-,B,A,B,B,B,B,A,B,B,A,A,B,B,A,B,A,B,A,B,A,B,A,B,B,A,A,-,A,-,B,-,A,B,A,B,A,-,A,B,A,A,A,A,A,B,A,B,B,A,B,A,A,-,A,A,A,A
S12_849944,,-,B,-,A,A,A,B,B,A,A,B,A,B,B,A,B,B,B,A,B,B,B,B,A,B,A,A,A,A,B,B,A,-,B,A,-,B,-,A,A,A,A,A,A,A,B,A,B,B,B,B,B,B,A,B,A,B,B,B,A,-,A,-,A,A,A,A,A,A,A,B,A,A,B,A,A,A,A,B,-,B,B,B,A,A,A,B,A,A,B,A,B,A,B,A,B,B,A,A,B,B,A,-,A,B,A,A,A,B,A,B,-,B,A,B,B,B,B,A,B,B,A,A,B,B,A,B,A,B,A,B,A,-,A,B,B,A,A,-,A,-,B,-,A,-,A,B,A,-,A,B,A,A,A,A,A,B,A,B,B,A,B,A,A,-,A,A,A,A
S12_893865,,-,B,-,A,A,A,B,B,A,A,B,A,B,B,A,B,B,B,A,B,-,B,-,A,B,A,A,A,A,B,B,A,B,B,A,B,B,B,A,A,A,A,A,-,A,B,A,B,B,B,B,B,B,A,B,A,B,B,B,-,B,A,A,A,A,A,A,A,A,A,B,A,A,B,A,A,A,A,B,A,B,B,B,A,A,A,B,A,A,B,A,B,A,B,A,B,B,A,A,B,B,A,-,A,B,A,A,A,B,A,B,-,B,A,B,B,B,B,A,B,B,A,A,B,B,A,B,A,B,A,B,A,B,A,B,-,A,A,-,A,-,B,B,A,-,A,B,A,-,A,B,A,A,A,A,A,B,A,B,B,A,B,A,A,-,A,A,A,A
S12_970787,,-,B,-,A,A,A,B,B,A,A,B,A,B,B,A,B,B,B,A,B,B,B,-,A,B,A,A,A,A,B,B,A,B,B,A,B,B,B,A,A,A,A,A,B,A,B,A,B,B,B,B,B,B,A,B,A,B,A,B,B,B,A,-,A,A,A,A,A,A,A,B,A,A,-,A,A,A,A,B,-,B,A,B,A,A,A,B,A,A,B,A,B,A,B,A,B,B,A,A,B,B,A,-,A,B,A,A,A,B,A,B,-,B,A,B,-,B,B,A,B,B,A,A,B,B,A,B,A,B,A,B,A,B,A,B,B,A,A,-,A,-,B,-,A,B,A,B,A,-,A,B,A,A,A,A,A,B,A,B,B,A,B,A,A,-,A,A,A,A
S12_1008516,,-,B,-,A,A,A,B,B,A,A,B,A,B,B,A,B,B,B,A,B,B,B,-,A,B,A,A,A,A,B,B,A,B,B,A,B,B,B,A,A,A,A,A,B,A,B,A,A,B,B,B,B,B,A,B,A,A,A,B,B,B,A,-,A,A,A,A,A,A,A,B,A,A,B,A,A,A,A,B,-,B,A,B,A,A,A,B,A,A,B,A,B,A,B,A,B,B,A,A,B,B,A,B,A,B,A,A,A,B,A,B,B,B,A,B,B,B,B,A,B,B,A,A,B,B,A,B,A,B,A,B,A,B,A,B,-,A,A,-,A,-,B,-,A,B,A,B,A,-,A,B,A,A,A,A,A,B,A,B,B,A,B,A,A,-,A,A,A,A
S12_1022615,,-,B,-,A,A,A,-,B,A,A,B,-,B,B,A,B,B,B,A,B,B,B,-,A,B,B,A,A,A,B,B,-,B,B,-,B,B,B,A,A,A,A,A,B,-,B,A,A,B,B,B,B,B,-,B,A,A,A,B,B,B,A,-,A,A,-,-,A,A,A,B,A,A,-,A,A,A,A,B,-,B,A,B,-,A,A,B,A,A,B,-,B,-,B,A,B,B,A,A,B,B,A,-,A,B,A,-,A,B,A,B,-,B,A,B,-,B,B,A,B,B,A,A,B,B,A,B,A,B,A,B,A,B,A,B,B,A,A,-,A,-,B,-,A,B,A,B,A,-,A,B,-,A,A,A,A,B,A,B,B,A,B,A,A,-,A,A,A,A
S12_1032550,,-,B,-,A,A,A,B,B,A,-,B,A,B,B,A,B,B,B,A,B,-,B,-,A,B,B,A,A,A,B,B,A,B,B,A,B,B,B,A,-,A,-,A,B,-,B,A,A,B,B,B,B,B,A,B,A,A,A,B,B,B,A,A,A,-,A,A,A,A,A,B,A,A,B,A,A,A,A,B,-,B,A,B,A,A,A,B,A,A,B,A,-,A,B,A,B,-,A,A,B,B,A,-,A,B,A,A,A,B,A,B,-,B,A,B,B,B,B,-,B,B,A,A,B,B,A,B,-,-,A,B,-,B,-,B,B,A,A,-,A,-,B,-,A,B,A,B,A,-,A,B,A,A,A,-,A,B,A,B,B,A,B,A,A,-,A,A,A,-
S12_1043664,,-,B,-,A,A,A,B,B,A,A,B,A,B,B,A,B,B,B,A,B,B,B,-,A,B,B,A,A,A,B,B,A,B,B,A,B,B,B,A,A,A,A,A,B,A,B,A,A,B,B,B,B,B,A,B,A,A,A,B,B,B,A,A,A,A,A,A,A,A,A,B,A,A,B,A,A,A,A,B,A,B,A,B,A,A,A,B,A,A,B,A,B,A,B,A,B,B,A,A,B,B,A,-,A,B,A,A,A,B,A,B,B,B,A,B,B,B,B,A,B,B,A,A,B,B,A,B,A,B,A,B,A,B,A,B,B,A,A,A,A,-,B,-,A,B,A,B,A,-,A,B,A,A,A,A,A,B,A,B,B,A,B,A,A,-,A,A,A,A
S12_1062235,,-,B,-,A,-,A,B,B,A,A,B,A,B,B,-,B,B,B,A,B,B,B,-,A,B,B,A,A,A,B,B,B,B,B,A,B,B,B,A,A,A,A,A,B,A,B,A,A,B,B,B,B,B,A,B,A,A,A,B,B,B,A,A,A,A,A,A,A,A,A,B,A,A,-,A,A,A,A,B,-,B,A,B,-,A,A,B,A,A,B,-,B,A,B,A,B,B,A,A,B,B,A,B,A,B,-,A,A,B,A,B,-,B,A,B,B,B,B,A,B,B,A,A,B,B,A,B,A,B,A,B,A,B,A,B,B,A,A,-,A,B,B,-,A,B,A,B,A,-,A,B,-,A,A,A,A,B,A,B,B,A,B,A,A,-,A,A,A,A
S12_1101185,,-,B,B,A,A,A,B,B,A,A,B,A,A,B,A,B,B,B,A,B,B,B,A,A,B,B,A,A,A,B,B,A,B,B,A,B,B,B,A,A,A,A,A,B,A,B,A,A,B,B,B,B,B,A,B,A,A,A,B,B,B,A,A,A,A,A,A,A,A,A,B,A,A,-,A,A,A,A,B,A,B,A,B,A,A,A,B,A,A,B,A,B,A,B,A,B,B,A,A,B,B,A,-,A,B,A,A,A,B,A,B,-,B,A,B,B,A,B,A,B,B,A,A,B,B,A,B,A,B,A,B,A,B,A,A,B,A,A,A,A,-,B,-,A,B,A,B,A,-,A,B,A,A,A,A,A,B,A,B,B,A,B,A,A,-,A,A,A,A
S12_1137265,,-,B,-,A,A,A,B,B,A,A,B,A,A,B,A,B,B,B,A,B,B,B,A,A,B,B,A,A,A,B,B,A,B,B,A,B,B,B,A,A,A,A,A,B,A,B,A,A,B,B,B,B,B,A,B,A,A,A,B,B,B,A,A,A,A,A,A,A,A,A,B,A,A,-,A,A,A,A,B,-,B,A,B,A,A,A,B,A,A,B,A,B,A,B,A,B,B,A,A,B,B,A,-,A,B,A,A,A,B,A,B,-,B,A,B,B,A,B,A,B,B,A,A,B,B,A,B,A,B,A,B,A,B,A,A,-,A,A,A,A,-,B,-,A,B,B,B,A,-,A,B,A,A,A,A,A,B,A,B,B,A,B,A,A,-,A,A,A,A
S12_1158611,,-,B,-,A,A,A,B,B,A,B,B,A,A,B,A,B,B,B,A,B,B,B,-,A,B,A,A,A,A,B,B,A,B,B,A,B,B,B,A,A,A,A,A,B,A,B,A,A,B,B,B,B,B,A,B,A,A,A,B,B,B,A,-,A,A,A,A,A,A,A,B,A,A,B,A,A,A,A,B,-,B,A,B,A,A,A,B,A,A,B,A,B,A,B,A,B,B,A,A,B,B,A,-,A,B,A,A,A,B,A,B,-,B,A,B,B,A,B,A,B,B,A,A,B,B,A,B,A,B,A,B,A,B,A,A,B,A,A,A,A,-,B,-,A,B,B,B,A,-,A,B,A,A,A,A,A,B,A,B,B,A,B,A,A,-,A,A,A,A
S12_1181361,,B,B,-,A,A,A,B,B,A,B,B,A,A,B,A,B,B,B,A,B,B,B,A,A,B,A,A,A,A,B,B,A,B,B,A,B,B,B,A,-,A,A,A,B,A,B,A,A,B,B,B,B,B,A,B,A,A,A,B,B,B,A,A,A,A,A,A,A,A,A,B,A,A,-,A,A,A,A,B,A,B,A,B,A,A,A,B,A,A,B,A,B,A,B,A,B,B,A,A,B,B,A,-,A,B,A,A,A,A,A,B,B,B,A,B,B,A,B,A,B,B,A,A,B,B,A,B,A,B,A,B,A,B,A,A,B,A,A,A,A,-,B,-,A,-,B,B,A,-,A,B,A,A,A,A,A,B,A,B,B,A,B,A,A,-,A,A,A,A
S12_1187040,,-,B,-,A,-,A,B,B,A,B,B,A,A,B,A,B,B,B,A,B,B,B,-,A,B,A,A,A,A,B,B,A,B,B,A,B,B,B,A,-,A,A,A,B,A,B,A,A,B,B,B,B,B,A,B,A,A,A,B,B,B,A,-,A,A,A,A,A,A,A,B,A,A,-,A,A,A,A,B,A,B,A,B,A,A,A,B,A,A,B,A,B,A,B,A,B,B,A,A,B,B,A,B,A,B,A,A,A,A,A,B,-,B,A,B,B,A,B,A,B,B,A,A,B,B,A,B,A,B,A,B,A,B,A,A,B,A,A,-,A,A,B,-,A,B,B,B,A,-,A,B,A,A,A,A,A,B,A,B,B,A,B,A,A,-,A,A,A,A
S12_1230942,,-,B,-,A,A,A,B,B,A,B,B,-,A,B,A,B,B,B,A,B,B,B,-,A,B,A,A,A,A,B,B,A,B,B,A,B,B,-,A,-,A,A,A,B,A,B,A,A,B,B,B,B,B,A,B,A,A,A,B,B,B,A,A,A,B,A,A,A,A,A,B,A,A,-,A,A,A,A,B,-,B,A,B,A,A,A,B,A,A,B,A,B,A,B,A,B,B,A,A,B,B,A,-,A,B,A,A,A,A,A,B,-,B,A,B,B,A,B,A,B,B,A,A,B,B,A,B,A,B,A,B,A,B,A,A,B,A,A,A,B,A,B,-,A,B,B,B,A,-,A,B,A,A,A,A,A,B,-,B,B,A,B,A,A,-,A,A,A,A
S12_1232219,,-,B,-,A,A,A,B,B,A,B,B,A,A,B,A,B,B,B,A,B,B,B,A,A,B,A,A,A,A,B,B,A,B,B,A,B,B,B,A,-,A,-,A,B,A,B,A,A,B,B,B,B,B,A,B,A,A,A,B,B,B,A,-,A,B,A,A,A,A,A,B,A,A,-,A,A,A,A,B,-,B,A,B,A,A,A,B,-,A,B,A,B,A,B,A,B,B,A,A,B,B,A,-,A,B,A,A,A,A,A,B,-,B,A,B,B,A,B,A,B,B,A,A,B,B,A,B,A,B,A,B,A,B,A,A,B,A,A,-,B,-,B,-,A,B,B,B,A,-,A,B,A,A,A,A,A,B,A,B,B,A,B,A,A,-,A,A,A,A
S12_1261304,,-,B,-,A,A,A,B,B,A,B,B,A,A,B,A,B,B,B,A,B,B,B,-,A,B,A,A,A,A,B,B,A,B,B,A,B,B,B,A,-,A,A,A,B,A,B,A,A,B,B,B,B,B,A,B,A,A,A,B,B,B,A,-,A,B,A,A,A,A,A,B,A,A,B,A,A,A,A,B,-,B,A,B,A,A,A,B,A,A,B,A,B,A,B,A,B,B,A,A,B,B,A,-,A,B,A,A,A,A,A,B,-,B,A,B,B,A,B,A,B,B,A,A,B,B,A,B,A,B,A,B,A,B,A,A,B,A,A,A,B,-,B,-,A,B,B,B,A,-,A,B,A,A,A,A,A,B,A,B,B,A,B,A,A,-,A,A,A,A
S13_49559,,-,A,-,A,A,B,A,B,A,B,B,A,B,B,B,A,B,A,A,A,B,B,A,A,B,B,B,A,A,A,B,A,B,B,A,B,B,B,A,B,A,B,A,A,A,B,A,-,B,A,B,B,B,B,A,B,B,A,A,A,B,B,B,A,B,A,A,A,B,A,B,A,A,A,B,B,A,A,A,A,A,B,A,A,A,A,B,A,A,A,A,-,A,B,A,A,A,A,B,B,B,A,A,A,B,A,B,A,A,B,B,-,B,A,B,A,A,B,B,A,A,B,A,B,B,B,B,A,A,A,A,A,A,B,A,A,A,A,B,A,-,A,-,B,A,B,A,B,-,A,B,A,B,B,B,A,B,A,A,A,A,A,A,A,-,A,A,A,B
S13_60672,,-,A,-,A,A,B,A,B,A,B,B,A,B,B,B,A,B,A,A,A,B,B,-,A,B,B,B,A,A,A,B,A,B,B,A,B,B,B,A,B,A,B,A,A,A,B,A,-,B,A,B,B,B,B,A,B,B,A,A,A,B,B,B,A,B,A,A,A,B,A,B,A,A,A,B,B,A,A,A,-,A,B,A,A,A,A,B,A,A,A,A,-,A,B,A,A,A,A,B,B,B,A,A,A,B,A,B,A,A,B,B,-,B,A,B,A,A,B,B,A,A,B,A,B,B,B,B,A,A,A,A,A,A,B,A,A,A,A,B,A,-,A,-,B,A,B,A,B,-,A,B,A,B,B,B,A,B,A,A,A,A,A,A,A,-,A,A,A,B
S13_65129,,-,A,-,A,A,B,A,B,A,B,B,A,B,B,B,A,B,A,A,A,B,B,-,A,B,B,B,A,A,A,B,A,B,B,A,B,B,B,A,B,A,B,A,A,A,B,A,-,B,A,B,B,B,B,A,B,B,A,A,A,B,B,B,A,B,A,A,A,B,A,B,A,A,-,B,B,A,A,A,-,A,B,A,A,A,A,B,A,A,A,A,B,A,B,A,A,A,A,B,B,B,A,A,A,B,A,B,A,A,B,B,-,B,A,B,A,A,B,B,A,A,B,A,B,B,B,B,A,A,A,A,A,A,B,A,-,A,A,-,A,-,A,A,B,A,B,A,B,-,A,B,A,B,B,B,A,B,A,A,A,A,A,A,A,A,A,A,A,B
S13_87557,,A,A,-,A,A,B,A,B,A,B,B,A,B,B,B,A,B,A,A,A,B,B,A,A,B,B,B,A,A,A,B,A,B,B,A,B,B,B,A,B,A,B,A,A,A,B,A,-,B,A,B,B,B,B,A,B,B,A,A,A,B,B,B,A,B,A,A,A,B,A,B,A,A,A,B,B,A,A,A,-,A,B,A,A,A,A,B,A,A,A,A,B,A,B,A,A,A,A,B,B,B,A,A,A,B,A,B,A,A,B,B,B,B,A,B,A,A,B,B,A,A,B,A,B,B,B,B,B,A,A,A,A,A,B,A,A,A,A,B,A,-,A,-,B,A,B,A,B,-,A,B,A,B,B,B,A,B,A,A,A,A,A,A,A,-,A,A,A,B
S13_89667,,-,A,-,A,A,B,A,B,A,B,B,-,B,B,B,A,B,A,A,A,B,B,-,A,B,B,B,A,A,A,B,A,B,B,A,B,B,B,A,B,A,B,A,A,A,B,A,-,B,A,-,B,B,B,A,B,B,A,A,A,B,B,-,A,B,-,A,A,B,A,B,A,A,-,B,B,A,A,A,-,A,B,A,-,A,A,-,A,A,A,-,-,A,B,A,A,A,A,B,B,B,A,A,A,B,A,B,A,A,B,B,-,B,A,B,-,A,B,B,A,A,B,A,B,B,B,B,B,A,A,A,A,A,B,A,-,A,A,B,A,-,A,-,B,A,B,A,B,B,A,B,A,B,B,B,A,B,-,A,A,A,A,A,A,-,A,A,A,B
S13_112554,,-,A,-,A,A,B,A,B,A,B,B,A,B,B,B,A,B,A,A,A,B,B,B,A,A,B,B,A,A,A,B,A,B,B,A,B,B,B,A,B,A,B,A,A,A,B,A,-,A,A,B,B,B,B,A,B,B,A,A,A,B,B,B,A,B,A,A,A,B,A,B,A,A,-,B,B,A,A,A,A,A,B,A,A,A,A,B,A,A,A,A,B,A,B,A,A,A,A,B,B,B,A,A,A,B,A,B,A,A,B,B,-,B,A,B,A,A,B,B,A,A,B,A,B,B,B,B,B,A,A,A,A,A,B,A,A,A,A,B,A,-,A,-,B,A,B,A,B,-,A,B,A,B,B,B,A,B,A,A,A,A,A,A,A,-,A,A,A,B
S13_131876,,-,A,-,A,A,B,A,B,A,B,B,A,B,B,B,A,B,A,A,A,B,B,A,A,A,B,B,A,A,A,B,A,B,B,A,B,B,B,A,B,A,B,A,A,A,B,A,-,A,A,B,B,B,B,A,B,B,A,A,A,B,B,B,A,B,A,A,A,B,A,B,A,A,A,B,B,A,A,A,A,A,B,A,A,A,A,B,A,A,A,A,B,A,B,A,A,A,A,B,B,B,A,A,A,B,A,B,A,A,B,B,-,B,A,B,A,A,B,B,A,A,B,A,B,B,B,B,B,A,A,A,A,A,B,A,A,A,A,B,A,-,A,-,B,A,B,A,B,-,A,B,A,B,B,B,A,B,A,A,A,A,A,A,A,-,A,A,A,B
S13_185112,,-,A,-,A,A,B,A,B,A,B,B,A,B,B,B,A,B,A,A,A,B,B,A,A,A,B,B,A,A,A,B,A,B,B,A,B,B,B,A,B,A,B,A,A,A,B,A,-,A,A,B,B,B,B,A,B,B,A,A,A,B,B,B,A,B,A,A,A,B,A,B,A,A,-,B,B,A,A,A,-,A,B,A,A,A,A,B,A,A,A,A,A,A,B,A,A,B,A,B,B,B,A,A,A,B,A,B,A,A,B,B,B,B,A,B,A,A,B,B,A,A,B,A,B,B,B,B,B,A,A,A,A,A,B,A,A,A,A,-,A,-,A,-,B,-,B,A,B,-,A,B,A,B,B,B,A,B,A,A,A,A,A,A,A,-,A,A,B,B
S13_230617,,-,A,-,A,-,B,-,B,A,B,B,A,B,B,B,A,B,A,A,A,B,B,-,A,A,B,B,-,A,A,A,A,B,B,A,B,B,B,A,B,A,B,A,A,A,B,B,B,A,A,B,B,B,B,A,A,B,A,A,A,B,B,-,A,B,-,A,A,B,A,B,A,A,-,B,B,A,A,A,-,A,B,A,A,A,A,B,A,A,A,A,A,A,B,A,A,B,A,B,B,B,A,A,A,B,A,B,A,A,B,-,B,A,A,B,A,A,B,B,A,A,B,A,B,B,B,B,A,A,-,A,A,A,B,A,A,A,A,-,A,-,A,-,B,-,B,A,B,-,A,B,A,B,B,B,A,B,A,A,A,B,A,A,A,-,A,A,B,B
S13_251741,,-,A,-,A,A,B,A,B,A,B,B,-,B,B,-,A,B,A,A,A,B,B,-,A,A,B,B,A,A,A,A,A,B,B,A,B,B,B,A,B,A,B,A,A,-,B,B,-,A,A,B,B,B,B,A,A,B,A,A,A,B,B,B,A,B,A,A,A,B,A,B,A,A,-,B,B,A,A,A,-,A,B,A,A,A,A,B,A,A,A,A,A,A,B,A,A,B,A,B,B,B,A,A,A,B,A,B,A,A,B,B,-,A,A,B,A,A,B,B,A,A,B,A,B,B,B,B,A,A,A,A,A,A,B,A,A,A,A,-,A,A,A,-,B,A,B,A,B,-,A,B,A,B,B,B,-,B,A,A,A,B,A,A,A,-,A,A,B,B
S13_292631,,-,A,-,A,A,B,A,B,A,B,B,A,B,B,B,A,B,A,A,A,B,B,-,A,A,B,B,A,A,A,A,A,B,B,A,B,B,B,A,B,A,B,A,A,A,B,B,-,A,A,B,B,B,B,A,A,B,A,A,A,B,B,-,A,B,A,A,A,B,A,B,A,A,-,B,B,A,A,A,A,A,B,A,A,A,A,B,A,A,A,A,A,A,B,A,A,B,A,B,B,B,A,A,A,B,A,B,A,A,B,B,B,A,A,B,A,A,B,B,A,A,B,A,B,B,B,B,A,A,A,A,A,A,B,A,A,A,A,B,A,-,A,-,B,A,B,A,B,-,A,B,A,B,B,B,A,B,A,A,A,B,A,A,A,-,A,A,B,B
S13_293891,,-,A,-,A,A,B,A,B,A,B,B,A,B,B,B,A,B,A,A,A,B,B,B,A,A,B,B,A,A,A,A,A,B,B,A,B,B,B,A,B,A,B,A,A,A,B,B,-,A,A,B,B,B,B,A,A,B,A,A,A,B,B,B,A,B,A,A,A,B,A,B,A,A,B,B,B,A,A,A,A,A,B,A,A,A,A,B,A,A,A,A,A,A,B,A,A,B,A,B,B,B,A,A,A,B,A,B,A,A,B,B,-,A,A,B,A,A,B,B,A,A,B,A,B,B,B,B,A,A,A,A,A,A,B,A,A,A,A,B,A,-,A,-,B,A,B,A,B,-,A,B,A,B,B,B,A,B,A,A,A,B,A,A,A,B,A,A,B,B
S13_296134,,-,A,-,A,A,B,A,B,A,B,B,-,B,B,B,A,B,A,A,A,B,B,-,A,A,B,B,A,A,A,A,A,B,B,A,B,B,B,A,B,A,B,A,A,A,B,B,-,A,A,B,B,B,B,A,A,B,A,A,A,B,B,B,A,B,A,A,A,B,A,B,A,A,-,B,B,A,A,A,-,A,B,A,A,A,A,B,-,A,A,A,A,A,B,A,A,B,A,B,B,B,A,A,A,B,A,B,A,A,B,B,-,A,A,B,A,A,B,B,A,A,B,A,B,B,B,B,A,-,A,A,A,A,B,A,A,A,A,B,A,-,A,-,B,A,B,A,B,-,A,B,A,B,B,B,A,B,A,A,A,B,A,A,A,-,A,A,B,B
S13_310387,,-,A,-,A,A,B,A,B,A,B,B,A,B,B,-,A,B,A,A,A,B,B,-,A,A,B,B,-,A,A,-,A,B,B,A,B,B,-,A,B,A,B,A,A,A,B,-,-,A,A,B,B,B,B,A,A,B,A,A,A,-,B,B,A,B,-,A,-,B,A,B,A,-,-,B,B,A,A,A,-,-,B,A,-,A,A,-,A,A,A,A,A,A,B,A,A,-,A,B,B,B,A,A,A,B,A,B,A,-,B,-,-,A,A,B,A,A,A,B,-,A,B,A,B,B,B,B,A,-,A,A,A,A,B,-,-,A,-,-,A,-,A,-,B,A,B,A,B,-,A,B,-,B,B,B,-,-,A,A,A,B,A,A,A,-,A,A,B,B
S13_328118,,-,A,-,A,A,B,A,B,A,B,B,A,B,B,B,A,B,A,A,A,B,B,-,A,A,B,B,A,A,A,A,A,B,B,A,B,B,B,A,B,A,B,A,A,A,B,B,-,A,A,B,B,B,B,A,A,B,A,A,A,B,B,B,A,B,A,A,A,B,A,B,A,A,B,B,B,A,A,A,A,A,B,A,A,A,A,B,A,A,A,A,A,A,B,A,A,B,A,B,B,B,A,A,A,B,A,B,A,A,B,B,-,A,A,B,A,A,A,B,A,A,B,A,B,B,B,B,A,A,A,A,A,A,B,A,A,A,A,B,A,-,A,-,B,A,B,A,B,-,A,A,A,B,B,B,A,B,A,A,A,B,A,A,A,-,A,A,B,B
S13_384524,,-,A,-,A,A,B,A,B,A,B,B,A,B,B,B,A,B,A,A,A,B,B,A,A,A,B,B,A,A,A,A,A,B,B,A,B,B,B,A,B,A,B,A,A,A,B,B,B,A,A,B,B,B,B,A,A,B,A,A,A,B,B,B,A,B,A,A,A,B,A,B,A,A,-,B,B,A,A,A,A,A,B,A,A,A,A,B,A,A,A,A,A,A,B,A,A,B,A,B,B,B,A,A,A,B,A,B,A,A,B,B,B,A,A,B,-,A,A,B,A,A,B,A,B,B,B,B,A,A,A,A,A,A,B,A,-,A,A,B,A,-,A,-,B,A,B,A,B,B,A,A,A,B,B,B,A,B,A,A,A,B,A,A,A,-,A,A,B,B
S13_458292,,-,A,-,B,A,B,-,B,A,-,B,-,B,B,-,A,B,A,A,A,B,B,-,A,A,-,B,-,A,A,A,A,B,B,A,B,B,B,A,B,A,B,A,A,B,B,B,-,A,A,-,B,B,B,A,A,A,A,A,A,B,B,-,-,B,A,A,A,B,A,B,-,A,-,B,B,A,A,A,-,A,B,A,A,A,A,B,-,A,A,A,A,A,A,A,A,B,A,B,B,B,A,-,A,B,A,B,A,A,B,B,-,A,A,B,A,-,B,B,A,A,A,A,B,B,B,B,A,A,A,A,A,A,B,A,A,A,A,-,A,A,A,-,B,-,B,A,B,-,A,A,A,B,B,B,A,B,A,A,A,B,A,A,A,-,A,A,B,B
S13_476613,,-,A,-,B,A,B,A,B,A,B,B,A,B,B,B,A,B,A,A,A,B,B,A,A,A,B,B,A,A,A,A,A,B,B,A,B,B,B,A,B,A,B,A,A,B,B,B,-,A,A,B,B,B,B,A,A,A,A,A,A,B,B,B,A,B,A,A,A,B,A,B,A,A,A,B,B,A,A,A,-,A,B,A,A,A,A,B,A,A,A,A,A,A,A,A,A,B,A,B,B,B,A,A,A,B,A,B,A,A,B,B,A,A,A,B,A,A,B,B,A,A,A,A,B,B,B,B,A,A,A,A,A,A,B,A,A,A,A,B,A,A,A,-,B,-,B,A,B,B,A,A,A,B,B,B,A,B,A,A,A,B,A,A,A,-,A,A,B,B
S13_510365,,-,A,-,B,A,B,-,B,A,B,B,A,B,B,-,A,B,A,A,A,B,B,-,A,A,B,B,A,A,A,A,A,B,B,A,B,B,B,A,B,A,B,A,A,-,B,B,-,A,A,B,B,B,B,A,A,A,A,A,A,B,B,-,A,B,A,A,A,B,A,B,-,A,-,B,B,A,A,A,-,A,B,A,A,A,A,B,-,A,A,-,A,A,A,A,A,B,A,B,B,B,A,A,A,B,A,B,-,A,B,B,-,A,A,B,A,A,B,B,-,A,A,A,B,B,B,B,A,A,A,-,A,A,B,A,-,A,A,-,A,A,A,-,B,-,B,A,B,-,B,A,-,B,B,B,A,B,-,A,A,B,A,A,A,-,A,A,B,B
S13_531550,,-,A,-,B,A,-,A,B,A,B,B,A,B,B,B,A,B,A,A,A,B,B,A,A,A,B,B,A,A,A,A,A,B,B,A,B,B,B,A,B,A,B,A,A,B,B,B,-,A,A,B,B,B,B,A,A,A,A,A,A,B,B,B,A,B,A,A,A,B,A,B,A,A,-,B,B,A,A,A,-,A,B,A,A,A,A,B,A,A,A,A,A,A,A,A,A,B,A,B,B,B,A,A,A,B,A,B,A,A,B,B,-,A,A,B,A,A,B,B,A,A,A,A,B,B,B,B,A,A,A,A,A,A,B,A,B,A,A,B,A,A,A,-,B,-,B,A,B,-,B,A,A,B,B,B,A,B,A,A,A,B,A,B,A,-,A,A,B,B
S13_560738,,-,A,-,B,A,-,A,B,A,A,B,A,B,B,B,A,B,A,B,A,B,B,-,A,A,B,B,-,A,A,A,A,B,B,A,B,B,B,A,B,A,B,A,A,-,B,B,-,A,A,B,B,B,B,A,A,A,A,A,A,B,B,B,A,B,A,A,A,B,A,B,A,A,-,B,B,A,A,A,A,A,B,A,A,A,A,B,A,A,A,A,A,A,A,A,A,B,A,B,B,B,A,A,A,B,A,B,A,A,B,B,-,A,A,B,A,A,B,B,A,A,A,A,B,B,B,B,A,A,A,A,A,A,B,A,B,A,A,-,A,A,A,-,B,A,B,A,B,-,B,A,A,B,B,B,A,B,A,A,A,B,A,B,A,B,A,A,-,B
S13_584647,,-,A,-,B,A,-,A,B,A,A,B,A,B,B,B,A,B,A,B,A,B,B,-,A,A,B,B,A,A,A,A,A,B,B,A,B,B,B,A,B,A,B,A,A,B,B,B,-,A,A,B,B,B,B,A,A,A,A,A,A,B,B,B,A,B,A,A,A,B,A,B,A,A,B,A,B,A,A,A,A,A,B,A,A,A,A,B,A,A,A,A,A,A,A,A,A,B,A,B,B,B,A,A,A,B,A,B,A,A,B,B,-,A,A,B,A,A,B,B,A,A,A,A,B,B,B,B,A,A,A,A,A,A,B,A,B,A,A,-,A,A,A,-,B,A,B,A,B,-,B,A,A,B,B,B,A,B,A,A,A,B,A,B,A,-,A,A,B,B
S13_627145,,-,A,-,B,A,-,A,B,A,A,B,A,B,B,B,A,B,A,B,A,B,B,A,A,A,B,B,A,A,A,A,A,B,B,A,A,B,B,A,B,A,B,A,A,B,B,B,-,A,A,B,B,B,B,A,A,A,A,A,A,B,B,B,A,B,A,A,A,B,A,B,A,A,B,A,B,A,A,A,-,A,B,A,A,A,A,B,A,A,A,A,A,A,A,A,A,B,A,B,B,B,A,A,A,B,A,B,A,A,B,B,-,A,A,B,A,A,B,B,B,A,A,A,B,B,B,B,B,A,A,A,A,A,B,A,B,A,A,B,A,A,A,-,B,A,B,A,B,-,B,A,A,B,B,B,A,B,A,A,A,B,A,B,A,-,A,A,B,B
S13_641192,,-,A,-,B,A,-,A,B,A,A,B,A,B,B,B,A,B,A,B,A,B,B,B,A,A,B,B,A,A,A,A,A,B,B,A,A,B,B,A,B,A,B,A,A,B,B,B,-,A,A,B,B,B,B,A,A,A,A,A,A,B,B,B,A,B,A,A,A,B,A,B,A,A,-,A,B,A,A,A,-,A,B,A,A,A,A,B,A,A,A,A,A,A,A,A,A,B,A,B,B,B,A,A,A,B,A,B,A,A,B,B,-,A,A,B,A,A,B,B,B,B,A,A,B,B,B,B,B,A,A,A,A,A,B,A,B,A,A,B,A,A,A,-,B,A,B,A,B,-,B,A,A,B,B,B,A,B,A,A,A,B,A,B,A,-,A,A,B,B
S13_664028,,B,A,-,B,A,A,A,B,B,A,B,A,B,A,-,A,B,B,A,A,B,B,-,B,-,A,A,A,B,A,A,B,A,B,A,A,B,A,B,A,A,A,B,B,-,-,B,A,A,B,B,A,B,B,A,B,A,A,A,B,A,B,B,B,A,A,B,A,A,A,A,A,A,B,A,B,B,A,B,A,B,-,B,B,B,A,A,B,A,A,A,A,B,A,B,B,A,A,A,B,A,B,B,A,B,A,A,B,A,B,A,A,A,A,B,A,B,A,A,B,B,B,A,B,A,A,A,B,A,B,B,B,A,A,A,A,A,A,B,A,-,A,-,A,B,A,A,A,-,A,B,A,A,A,A,B,A,A,B,B,A,A,A,B,-,A,B,A,B
S13_671615,,-,A,-,B,-,-,-,B,A,A,B,A,B,B,B,A,B,A,B,A,B,B,-,A,A,B,B,-,A,A,A,A,B,B,A,A,B,-,A,B,A,B,A,A,-,B,B,-,A,A,-,B,B,B,A,A,A,A,A,A,B,B,-,A,B,-,A,-,B,A,B,A,A,-,A,B,A,A,A,-,A,B,A,A,A,-,B,A,A,A,A,A,A,A,A,A,B,A,B,B,B,A,A,A,B,A,-,A,A,B,-,A,A,A,-,-,A,B,B,-,B,A,A,B,B,B,B,B,-,A,A,A,A,B,-,B,A,-,B,A,A,A,-,B,A,B,A,B,-,B,A,A,B,B,B,A,B,-,-,A,B,A,B,A,-,A,A,B,B
S14_23401,,-,B,-,A,A,A,A,A,B,A,B,A,B,A,B,B,A,A,A,A,B,A,A,A,B,B,B,A,B,B,A,B,A,-,B,B,B,A,B,A,A,B,A,A,A,A,B,A,B,B,A,B,A,A,A,A,A,A,-,B,B,B,B,B,A,A,A,B,B,B,B,A,B,-,B,A,A,A,B,A,A,B,A,A,B,B,A,B,A,A,B,A,A,B,A,A,A,B,A,A,-,A,-,A,A,B,A,A,B,A,A,B,A,A,B,B,B,A,B,B,B,A,A,A,A,B,B,A,A,B,B,B,A,B,B,B,A,A,B,B,A,A,-,B,A,B,A,A,-,B,B,A,B,B,A,B,A,B,A,B,B,B,B,A,-,B,A,A,A
S14_25234,,B,B,-,A,A,A,A,A,B,A,B,A,B,A,B,B,A,A,A,A,B,A,A,A,B,B,B,A,B,B,A,B,A,-,B,B,B,A,B,A,A,B,A,A,A,A,B,A,B,B,A,B,A,A,A,A,A,A,B,B,B,B,B,B,A,A,A,B,B,B,B,A,B,-,B,A,A,A,B,-,A,B,A,A,B,-,A,B,A,A,B,A,A,B,A,A,A,B,A,A,-,A,-,A,A,B,A,A,B,A,A,B,A,A,B,B,B,A,B,B,B,A,A,A,A,B,B,A,A,B,B,B,A,B,B,B,A,A,B,B,A,A,-,B,A,B,A,A,-,B,B,A,B,B,A,B,A,B,A,B,B,B,B,A,-,B,A,A,A
S14_69666,,-,B,-,-,A,A,A,A,B,A,B,A,B,A,B,B,A,A,A,A,B,A,A,A,B,B,B,A,B,B,A,B,A,-,B,B,B,A,B,A,A,B,A,A,-,A,B,A,B,B,A,B,A,A,A,A,A,A,B,B,B,B,-,B,A,A,-,B,B,B,B,A,B,-,B,A,A,A,B,-,A,B,A,A,B,-,A,B,A,A,B,A,A,B,A,A,A,B,A,A,-,A,-,A,A,B,A,A,B,A,A,B,A,A,B,B,B,A,B,-,B,A,A,A,A,B,B,A,A,B,B,B,A,B,B,B,A,A,-,B,A,A,-,B,-,B,A,A,-,B,B,A,B,B,A,B,A,B,A,B,B,B,B,A,-,B,A,A,A
S14_90635,,B,B,-,A,A,A,A,A,B,A,B,A,B,A,-,B,A,A,A,A,B,A,-,A,B,B,B,A,B,B,A,B,A,A,B,B,B,A,B,A,A,B,A,A,-,A,B,A,B,B,A,B,A,A,A,A,A,A,-,B,-,B,-,B,A,A,A,B,B,B,B,A,B,-,B,A,A,A,B,-,A,B,A,A,B,A,A,-,A,A,-,A,A,B,A,A,A,B,A,A,-,A,-,A,A,B,A,A,-,B,A,-,A,A,B,-,B,A,B,B,B,A,A,A,A,B,B,A,A,B,B,B,A,B,B,-,A,A,-,B,A,A,-,B,A,B,A,A,-,B,B,A,B,B,A,B,A,B,A,B,B,B,B,A,-,B,A,A,A
S14_115742,,-,B,-,A,A,A,A,A,B,A,B,A,B,A,B,B,A,A,A,A,B,A,-,A,B,B,B,A,B,B,A,B,A,A,B,B,B,A,B,A,A,B,A,A,A,A,B,A,B,B,A,B,A,A,A,A,A,A,-,B,B,B,B,B,A,A,A,B,B,B,B,A,B,A,B,A,A,A,B,-,A,B,A,A,B,-,A,B,A,A,B,A,A,B,A,A,A,B,A,A,-,A,-,A,A,B,A,A,B,B,A,B,A,A,B,B,B,A,B,B,B,A,A,A,A,B,B,A,A,A,B,B,A,B,B,B,A,A,B,B,A,A,-,B,-,B,A,A,-,B,B,A,B,B,A,B,A,B,A,B,B,B,B,A,-,B,A,A,A
S14_132453,,-,B,-,A,A,A,A,A,B,A,B,A,B,A,B,B,A,A,A,A,B,A,A,A,B,B,B,A,B,B,A,B,A,A,B,B,B,A,B,A,A,B,A,A,A,A,B,A,B,B,A,B,A,A,A,A,A,A,-,B,B,B,-,B,A,A,A,B,B,B,B,A,B,A,B,A,A,A,B,-,A,B,A,A,B,B,A,B,A,A,-,A,A,B,A,A,A,B,A,A,-,A,-,A,A,B,A,A,B,B,A,-,A,A,B,B,B,A,B,B,B,A,A,A,A,B,B,A,A,A,B,B,A,B,B,B,A,A,-,B,A,A,-,B,A,B,A,A,-,B,B,A,B,B,A,B,A,-,A,B,B,B,B,A,-,B,A,A,A
S14_150071,,-,B,-,A,A,A,A,A,B,A,B,A,B,A,-,B,A,A,A,A,B,A,-,A,B,B,B,A,B,B,A,-,A,A,B,B,B,A,B,A,A,B,A,A,A,A,B,A,B,B,A,B,A,A,A,A,A,A,B,B,B,B,-,B,A,A,A,B,B,B,B,A,B,-,B,A,A,A,B,-,A,B,A,A,B,-,A,B,A,A,B,A,A,B,A,A,A,B,A,A,-,A,-,A,A,B,A,A,B,B,A,-,A,A,B,B,B,A,B,B,B,A,A,A,A,B,B,A,A,A,B,B,A,B,B,-,A,A,-,B,A,A,-,B,A,B,A,A,-,B,B,A,B,B,A,B,A,B,A,B,B,B,B,A,-,B,A,A,A
S14_156523,,B,B,-,A,A,A,A,A,B,A,B,A,B,A,B,B,A,A,A,A,B,A,-,A,B,B,B,A,B,A,A,B,A,A,B,B,B,A,B,A,A,B,A,A,A,A,B,A,B,B,A,B,A,A,A,A,A,A,-,B,B,B,B,B,A,A,B,B,B,B,B,A,B,A,B,A,A,A,B,A,A,B,A,A,B,-,A,B,A,A,B,A,A,B,B,A,A,B,A,A,-,A,-,A,A,B,A,A,B,B,A,B,A,A,B,B,B,A,B,B,B,A,A,A,A,B,B,A,A,A,B,B,A,B,B,B,A,A,-,B,A,A,-,B,A,B,A,A,-,B,B,A,B,B,A,B,A,B,A,B,B,B,B,A,-,B,A,A,A
S14_220229,,-,B,-,A,A,A,A,A,B,A,B,A,B,A,B,B,A,A,A,A,B,A,A,A,B,B,B,A,B,A,A,B,A,A,B,B,B,A,B,A,A,B,A,A,A,A,B,A,B,B,A,B,A,A,A,A,A,A,-,B,B,B,B,B,A,A,B,B,B,B,B,A,B,A,B,A,A,A,B,-,A,B,A,A,B,A,A,B,A,A,B,A,A,B,B,A,A,B,A,A,B,A,-,A,A,B,A,A,B,B,A,B,B,A,B,B,B,A,B,B,B,A,A,A,A,B,B,A,A,A,A,B,A,B,B,B,A,A,B,B,A,A,-,B,-,B,A,A,-,B,B,A,B,B,A,B,A,B,A,B,B,B,B,A,-,B,A,A,A
S14_258127,,-,B,-,A,-,A,A,A,B,A,B,A,B,A,-,B,A,A,A,A,B,A,-,A,B,B,B,A,B,A,A,B,A,A,B,B,B,A,B,A,A,B,A,A,A,A,B,A,B,B,A,B,A,B,B,A,A,A,A,B,B,B,B,B,A,A,B,-,B,B,B,A,B,-,B,A,A,A,B,A,A,B,A,A,B,A,A,B,A,A,B,A,A,B,B,A,B,B,A,A,B,A,-,A,A,B,A,A,B,B,A,-,B,A,B,B,B,A,B,B,B,A,A,A,A,B,B,A,A,A,A,B,A,B,B,-,A,A,-,B,A,A,-,B,A,B,A,A,-,B,B,A,B,B,A,B,A,-,A,B,B,B,B,A,-,B,B,A,A
S14_285819,,-,B,-,A,A,A,A,A,B,A,B,A,B,A,B,B,A,A,A,A,B,A,A,A,B,B,B,A,B,A,A,B,A,-,B,B,B,A,B,A,A,B,A,A,A,A,B,A,A,B,A,B,A,B,B,A,A,A,A,B,B,B,B,B,A,A,B,B,B,B,B,A,B,A,B,A,A,A,B,-,A,B,A,A,B,A,A,B,A,A,B,A,A,B,B,A,B,B,A,A,B,A,-,A,A,B,A,A,B,B,A,-,B,A,B,B,B,A,B,B,B,A,A,A,A,B,B,A,A,A,A,A,A,B,B,B,A,A,B,B,A,A,-,B,A,B,A,A,-,B,B,A,B,B,A,B,A,B,A,B,B,B,B,A,-,B,B,A,A
S14_306650,,B,B,-,A,A,A,A,A,B,A,B,A,B,A,-,B,A,A,A,A,B,A,-,A,B,B,B,-,A,A,A,B,A,-,B,B,B,A,B,A,A,B,A,A,-,A,B,A,A,-,A,B,A,B,B,A,A,A,A,B,-,B,-,B,A,A,B,B,B,B,B,A,B,-,B,A,A,A,B,-,A,B,A,A,B,A,A,B,A,A,B,A,A,B,B,A,B,B,A,A,B,A,-,A,A,B,B,A,B,B,A,-,B,A,B,B,B,A,B,B,B,A,A,A,A,B,B,A,A,A,A,A,A,B,B,-,A,A,B,B,A,A,-,B,A,B,A,A,-,B,B,A,B,B,A,B,A,B,A,B,B,B,B,A,-,B,B,A,A
S14_307651,,-,B,-,A,A,A,A,A,B,A,B,A,B,A,B,B,A,A,A,A,B,A,-,A,B,B,B,A,A,A,A,B,A,-,B,B,B,A,B,A,A,B,A,A,A,A,B,A,A,B,A,B,A,B,B,A,A,A,A,B,B,B,B,B,A,A,B,B,B,B,B,A,B,-,B,A,A,A,B,A,A,B,A,A,B,A,A,B,A,A,B,A,A,B,B,A,B,B,A,A,B,A,-,A,A,B,B,A,B,B,A,-,B,A,B,B,B,A,B,B,B,A,A,A,A,B,B,A,-,A,A,A,A,B,B,B,A,A,-,B,A,A,-,B,A,B,A,A,-,B,B,A,B,B,A,B,A,B,A,B,B,B,B,A,-,B,B,A,A
S14_340286,,-,B,-,A,A,A,-,A,B,A,B,-,B,A,-,B,A,A,A,A,B,A,-,A,B,B,B,A,A,A,A,B,A,-,B,B,B,-,B,A,A,B,A,A,-,A,B,A,A,B,A,B,B,B,B,A,A,A,A,B,B,B,B,B,A,A,B,B,B,B,B,A,B,-,B,A,A,A,B,-,A,B,A,A,B,A,A,B,A,A,B,A,A,B,B,A,B,B,A,A,B,A,A,A,A,-,B,A,B,B,A,-,B,A,B,B,B,A,B,-,B,A,A,A,A,B,B,A,-,A,A,A,A,B,B,B,A,B,-,B,A,B,-,B,-,B,A,A,-,B,B,-,B,B,A,B,A,B,A,B,B,B,B,A,-,B,B,A,A
S14_344630,,-,B,-,A,A,A,A,A,B,A,B,A,B,A,-,B,A,A,A,A,B,A,-,A,B,B,B,A,A,A,A,B,A,-,B,B,B,A,B,A,A,B,A,A,A,A,B,A,A,B,A,B,B,B,B,A,A,A,A,B,B,B,B,B,A,A,B,B,B,B,B,A,B,-,B,A,A,A,B,-,A,B,A,A,B,A,A,B,A,A,B,A,A,B,B,A,B,B,A,A,B,A,-,A,A,B,B,A,B,B,A,-,B,A,B,B,B,A,B,B,B,A,A,A,A,B,B,A,A,A,A,A,A,B,B,B,A,B,-,B,A,B,-,B,A,B,A,A,-,B,B,A,B,B,A,B,A,B,A,B,B,B,B,A,-,B,B,A,A
S14_349093,,-,B,-,A,A,A,A,A,B,A,B,A,B,A,B,B,A,A,A,A,B,A,-,A,B,B,B,A,A,A,A,B,A,-,B,B,B,A,B,A,A,B,A,A,A,A,B,A,A,B,A,B,B,B,B,A,A,A,A,B,B,B,-,B,A,A,B,B,B,B,B,A,B,-,B,A,A,A,B,-,A,B,A,A,B,A,A,B,A,A,B,A,A,B,B,A,B,B,A,A,B,A,-,A,A,B,B,A,B,B,A,B,B,A,B,B,B,A,B,B,B,A,A,A,A,B,B,A,A,A,A,A,A,B,B,B,A,B,-,B,A,B,-,B,A,B,A,A,-,B,B,A,B,B,A,B,A,B,A,B,B,B,B,A,-,B,B,A,A
S14_362940,,-,B,-,A,A,A,A,A,B,A,B,A,B,A,B,B,A,A,A,A,B,A,A,A,B,B,B,A,A,A,A,B,A,-,B,B,B,A,B,A,A,B,A,A,A,A,B,A,A,B,A,B,B,B,B,A,A,A,A,B,B,B,-,B,A,A,B,B,B,B,B,A,B,B,B,A,A,A,B,-,A,B,A,A,B,A,A,B,A,A,B,A,A,B,B,A,B,B,A,A,B,A,-,A,A,B,B,A,B,B,A,B,B,A,B,B,B,A,B,B,B,A,A,A,A,B,B,A,A,A,A,A,A,B,B,B,A,B,-,B,A,B,-,B,A,B,A,A,-,B,B,A,B,B,A,B,A,B,A,B,B,B,B,A,A,B,B,A,A
S14_368614,,-,B,-,-,A,A,A,A,B,A,B,A,B,A,-,B,-,A,A,A,B,A,-,A,B,B,B,A,A,A,-,B,-,-,B,-,B,A,B,A,A,B,A,A,-,-,B,A,A,B,A,B,B,B,B,A,A,A,A,B,B,B,-,-,-,-,B,B,B,B,B,A,B,-,B,A,A,A,B,-,A,B,A,-,B,A,A,B,A,A,B,A,A,B,B,A,B,B,A,A,B,A,A,A,A,-,B,A,B,B,A,-,B,A,B,B,B,A,B,B,B,A,A,A,A,B,B,A,-,A,A,A,A,B,B,-,A,B,B,B,A,B,-,B,A,-,A,A,-,B,B,-,B,B,-,B,A,-,A,B,B,B,B,A,-,B,B,A,-
S14_373459,,B,B,-,A,A,A,A,A,B,A,B,A,B,A,B,B,A,A,A,A,B,A,-,A,B,B,B,A,A,A,A,B,A,-,B,B,B,A,B,A,A,B,A,A,A,A,B,A,A,B,A,B,B,B,B,A,A,A,A,B,B,B,B,B,A,A,B,B,B,B,B,A,B,B,B,A,A,A,B,-,A,B,A,A,B,A,A,B,A,A,B,A,A,B,B,A,B,B,A,A,B,A,-,A,A,B,B,A,B,B,A,-,B,A,B,B,B,A,B,B,B,A,A,A,A,B,B,A,A,A,A,A,A,B,B,B,A,B,B,B,A,B,-,B,-,B,A,A,-,B,B,A,B,B,A,B,A,B,A,B,B,B,B,A,-,B,B,A,A
S14_395931,,-,B,-,A,A,A,A,A,B,A,B,A,B,A,B,B,A,A,A,A,B,A,A,A,B,B,B,A,A,A,A,B,A,-,B,B,B,A,B,A,A,B,A,A,A,A,B,A,A,B,A,B,B,B,B,A,A,A,A,B,B,B,B,B,A,A,B,B,B,B,B,A,B,B,B,A,A,A,B,A,A,B,A,A,B,A,A,B,A,A,B,A,A,B,B,A,B,B,A,A,B,A,B,A,A,B,B,A,B,B,A,-,B,A,B,B,B,A,B,B,B,A,A,A,A,B,B,A,A,A,A,A,A,B,B,B,A,B,B,B,A,B,-,B,A,B,A,A,A,B,B,A,B,B,A,B,A,B,A,B,B,B,B,A,-,B,B,A,A
S14_442434,,-,B,-,A,A,A,A,A,B,A,B,A,B,A,B,B,A,A,A,A,B,A,A,A,B,B,B,A,A,A,A,B,A,-,B,B,B,A,B,A,A,B,A,A,A,A,B,A,A,B,A,B,B,B,B,A,A,A,A,B,B,B,-,B,A,A,B,B,B,B,B,A,B,-,B,A,A,A,B,-,A,B,A,A,B,A,A,B,A,A,B,A,A,B,B,A,B,B,A,A,B,A,B,A,A,B,B,A,B,B,A,-,B,A,B,B,B,A,B,B,B,A,A,A,A,B,B,A,A,A,A,A,A,B,B,B,A,B,B,B,A,B,-,B,A,B,A,A,-,B,B,A,B,B,A,B,A,B,A,B,B,B,B,A,-,B,B,A,A
S14_452717,,B,B,-,A,A,A,A,A,B,A,B,-,B,A,B,B,A,A,A,A,B,A,-,A,B,B,B,-,A,A,A,B,A,-,B,B,B,A,B,B,A,B,A,A,A,A,B,A,A,B,A,B,B,B,B,A,A,A,A,B,B,B,B,B,A,A,B,B,B,B,B,A,B,B,B,A,A,A,B,-,A,B,A,A,B,A,A,B,A,A,B,A,A,B,B,A,B,B,A,A,B,A,B,A,A,B,B,A,B,B,A,B,B,A,B,B,B,A,B,B,B,A,A,A,A,B,B,A,A,A,A,A,A,B,B,B,A,B,B,B,A,B,-,B,A,B,A,A,-,B,B,A,B,B,A,B,A,B,A,B,B,B,B,A,-,B,B,A,A
S14_458592,,-,B,-,A,A,A,A,A,B,A,B,A,B,A,B,B,A,A,A,A,B,A,A,A,B,B,B,A,A,A,A,B,A,-,B,B,B,A,B,B,A,B,A,A,A,A,B,A,A,B,A,B,B,B,B,A,A,A,A,B,B,B,B,B,A,A,B,B,B,B,B,A,B,B,B,A,A,A,B,-,A,B,A,A,B,A,A,B,A,A,B,A,A,B,B,A,B,B,A,A,B,A,B,A,A,B,B,A,B,B,A,-,B,A,B,B,B,A,B,B,B,A,A,A,A,B,B,A,A,A,A,A,A,B,B,B,A,B,-,B,A,B,-,B,A,B,A,A,-,B,B,A,B,B,A,B,A,B,A,B,B,B,B,A,-,-,B,A,A
S14_488761,,-,B,-,A,A,A,A,A,B,A,B,A,B,A,B,B,A,A,A,A,B,A,A,A,B,B,B,-,A,A,A,B,-,A,B,B,B,A,B,B,A,B,A,A,A,A,B,A,A,B,-,B,B,B,B,A,A,A,A,B,B,-,-,B,A,A,B,B,B,B,B,A,B,-,B,A,A,A,B,-,A,B,A,-,B,A,A,B,A,A,-,A,A,B,B,A,B,B,A,A,B,A,B,A,A,B,B,-,B,B,A,-,B,A,B,B,B,A,B,B,B,A,A,A,A,B,B,A,A,A,A,A,A,B,B,B,A,B,-,B,A,B,-,B,A,B,A,A,-,A,B,A,B,B,A,B,A,-,A,A,B,B,B,A,-,-,B,A,A
S14_505661,,-,B,-,A,A,A,A,A,B,A,B,A,B,A,B,B,A,A,A,A,B,A,-,A,B,B,B,A,A,A,A,B,A,A,B,B,B,A,B,B,A,B,A,A,A,A,B,A,A,B,A,B,B,B,B,A,A,A,A,B,B,B,B,B,A,A,B,B,B,B,B,A,B,B,B,A,A,A,B,A,A,B,A,B,B,A,A,B,A,A,B,A,A,B,B,A,B,B,A,A,B,A,B,A,A,B,B,A,B,B,A,-,B,A,B,B,B,A,B,B,B,A,A,A,A,B,B,A,A,A,A,A,A,B,B,B,A,B,B,B,A,B,-,B,A,B,A,A,-,A,B,A,B,B,A,B,A,B,A,A,B,B,B,A,-,-,B,A,A
S14_508408,,-,-,-,A,A,A,A,A,-,A,B,A,B,-,B,B,A,A,A,A,-,A,-,A,B,B,B,A,A,A,A,-,-,A,B,B,-,A,B,B,A,B,A,A,-,A,B,A,A,B,A,B,B,B,B,A,A,A,A,B,-,B,B,B,A,A,B,B,B,B,B,A,B,-,B,-,A,A,B,-,A,B,A,B,B,A,A,B,A,A,B,A,A,B,B,A,B,B,A,A,B,A,B,A,A,B,B,A,B,-,A,B,B,A,B,B,B,A,B,B,B,A,A,A,A,B,B,A,A,A,A,A,A,B,B,B,A,B,-,B,A,B,-,B,A,B,A,A,-,A,B,A,B,B,-,B,A,B,A,A,B,B,B,A,-,-,B,A,-
S14_546328,,-,B,-,-,A,A,A,A,B,A,B,A,B,A,-,B,A,-,A,A,B,B,-,A,B,B,B,A,A,A,A,B,A,A,B,B,-,A,B,B,A,B,A,A,A,A,B,-,A,B,A,B,B,B,B,A,A,A,A,B,B,B,-,B,A,A,-,B,B,B,B,A,B,-,B,B,A,A,B,-,A,B,A,B,B,-,A,B,A,A,B,A,A,B,A,A,B,B,A,A,B,A,B,A,A,A,B,A,B,B,-,-,B,A,B,B,B,A,B,B,B,A,A,A,A,B,B,A,-,A,A,A,A,B,-,-,A,B,B,B,A,B,-,B,A,B,A,A,-,A,B,A,B,B,A,B,A,-,A,A,B,B,B,A,-,-,B,A,A
S14_560264,,-,B,-,A,A,A,A,A,B,A,B,A,B,A,B,B,A,A,A,A,B,B,A,A,B,B,B,A,A,A,A,B,A,A,B,B,B,A,B,B,A,B,A,A,A,A,B,A,A,B,A,B,B,B,B,A,A,A,A,B,B,B,-,B,A,A,A,B,B,B,B,A,B,B,B,B,A,A,B,A,A,B,A,B,B,A,A,B,A,A,B,A,A,B,A,A,B,B,A,A,B,A,B,A,A,A,B,A,B,B,A,-,B,A,B,B,B,A,B,B,B,A,A,A,A,B,B,A,A,A,A,A,A,B,B,B,A,B,B,B,A,B,-,B,A,B,A,A,-,A,B,A,B,B,A,B,A,B,A,A,B,B,B,A,-,-,B,A,A
S14_561942,,-,B,-,A,A,A,A,A,B,A,B,A,B,A,B,B,A,A,A,A,B,B,-,A,B,B,B,A,A,A,A,B,A,A,B,B,B,A,B,B,A,B,A,A,A,A,B,A,A,B,A,B,B,B,B,A,A,A,A,B,B,B,-,B,A,A,A,B,B,B,B,A,B,-,B,B,A,A,B,-,A,B,A,B,B,A,A,B,A,A,-,A,A,B,A,A,B,B,A,A,B,A,B,A,A,A,B,A,B,B,A,-,B,A,B,B,B,A,B,B,B,A,A,A,A,B,B,A,A,A,A,A,A,B,B,B,A,B,B,B,A,B,-,B,A,B,A,A,-,A,B,A,B,B,A,B,A,B,A,A,B,B,B,A,-,A,B,A,A
S14_576579,,B,B,-,A,A,A,A,A,B,A,B,A,B,A,-,B,A,A,A,A,B,B,A,A,B,B,B,A,A,A,A,B,A,A,B,B,B,A,B,B,A,B,A,A,A,A,B,B,A,B,A,B,B,B,B,A,A,A,A,B,B,B,B,B,A,A,A,B,B,B,B,A,B,-,B,B,A,A,B,A,A,B,A,B,B,A,A,B,A,A,B,A,A,B,A,A,B,B,A,A,B,A,B,A,A,A,B,A,B,B,A,-,B,A,B,B,B,A,B,B,B,A,A,A,A,B,B,A,A,A,A,A,A,B,B,B,A,B,B,B,A,B,-,B,A,B,A,A,-,A,B,A,B,B,A,B,A,B,A,A,B,B,B,A,-,-,B,A,A
S14_590756,,-,B,-,A,A,A,A,A,B,A,B,-,B,A,B,B,A,A,A,A,B,B,-,A,B,B,B,A,A,A,A,B,A,A,B,B,B,A,B,B,A,B,A,A,A,A,B,B,A,B,A,B,B,B,B,A,A,A,A,B,B,B,-,B,A,A,A,B,B,B,B,A,B,-,B,B,A,A,B,A,A,B,A,B,B,A,A,B,A,A,B,A,A,B,A,A,B,B,A,A,B,A,B,A,A,A,B,A,B,B,A,-,B,A,B,B,B,A,B,B,B,A,A,A,A,B,B,A,-,A,A,A,A,B,B,B,A,B,-,B,A,B,-,B,A,B,A,A,-,A,B,A,B,B,A,B,A,B,A,A,B,B,B,A,-,-,B,A,A
S15_93607,,-,A,-,B,-,A,A,A,B,A,B,A,A,B,A,B,A,B,B,B,B,A,-,A,B,A,B,-,A,A,B,A,A,B,A,A,A,B,A,B,A,A,A,B,-,A,B,A,B,A,B,B,A,B,A,A,A,B,B,A,A,A,-,A,A,A,B,B,B,A,A,A,A,-,B,B,A,A,A,-,B,A,B,B,B,B,B,B,A,B,B,A,B,A,B,A,B,A,A,A,B,B,A,B,A,A,B,A,A,A,A,-,B,A,B,-,A,B,B,-,A,A,A,A,B,A,A,B,B,A,A,A,B,A,A,-,B,B,B,B,A,B,-,B,A,B,B,A,-,B,B,A,B,A,B,A,A,A,B,A,B,B,B,A,-,B,A,B,B
S15_101027,,-,A,-,B,B,A,A,A,B,A,B,A,A,B,A,B,A,B,B,B,B,A,B,A,B,A,B,B,A,A,B,A,A,A,B,A,A,B,A,B,A,A,A,B,B,A,-,B,B,A,B,B,A,B,A,A,B,B,B,A,B,A,A,A,A,A,A,B,B,A,A,A,A,A,-,B,A,A,A,A,B,A,B,B,B,B,B,B,A,B,B,A,B,A,A,A,B,A,A,A,B,B,A,B,A,A,B,A,A,A,A,-,B,A,B,A,A,B,B,B,A,A,A,A,B,A,A,B,B,A,A,A,B,A,A,B,B,B,B,B,A,B,-,B,A,B,B,A,-,B,B,A,B,A,B,A,A,A,B,A,B,B,B,A,-,B,A,B,B
S15_191049,,-,A,-,B,B,A,A,A,B,-,B,A,A,B,A,B,A,B,B,B,B,A,B,A,B,A,B,B,A,A,B,A,A,A,B,A,A,B,A,B,A,A,A,B,B,A,-,B,B,A,B,B,A,B,A,A,B,B,B,B,B,A,A,A,B,A,A,B,B,A,A,A,A,-,-,B,A,A,A,-,B,A,B,B,B,B,B,B,A,B,B,A,B,A,A,A,B,A,A,A,B,B,A,B,A,A,B,A,A,A,A,-,B,A,B,A,A,B,B,B,A,A,A,A,B,A,A,B,B,A,A,A,B,A,A,B,B,B,B,B,A,B,-,B,A,B,B,A,-,B,B,A,B,A,B,A,A,A,B,A,B,B,B,B,-,B,A,B,B
S15_200252,,-,A,-,B,B,A,-,A,B,-,B,A,A,B,A,B,A,B,B,B,B,A,-,A,B,A,B,B,A,A,B,A,-,A,B,-,A,B,A,B,A,A,-,B,B,-,-,B,B,A,B,B,A,B,A,A,B,B,B,B,B,A,-,A,B,-,A,B,B,A,A,A,A,-,-,B,A,A,A,-,B,A,B,B,B,B,B,B,A,B,B,A,B,A,A,A,B,A,A,-,B,B,A,B,A,A,B,A,A,A,A,-,B,A,B,A,A,B,B,B,A,A,A,A,B,A,A,B,B,A,A,A,B,A,A,-,B,-,B,B,A,B,-,B,A,B,B,A,-,B,B,A,B,A,B,A,A,-,B,A,B,B,B,B,-,B,A,B,B
S15_209357,,-,A,-,B,B,A,A,A,B,-,B,A,A,B,A,B,A,B,B,B,B,A,-,A,B,A,B,B,A,A,B,A,A,A,B,A,A,B,A,B,A,A,A,B,B,A,-,B,B,A,B,B,A,B,A,A,B,B,B,B,B,A,A,A,B,A,A,B,B,A,A,A,A,-,-,B,A,A,A,A,B,A,B,B,B,B,B,B,A,B,B,A,B,A,A,A,B,A,A,A,B,B,A,B,A,A,B,A,A,A,A,-,B,A,B,A,A,B,B,B,A,A,A,A,B,A,A,B,B,A,A,A,B,A,A,B,B,B,B,B,A,B,-,B,A,B,B,A,-,B,B,A,B,A,B,A,A,-,B,A,B,B,B,B,-,B,A,B,B
S15_211216,,-,A,-,B,B,A,-,A,B,A,B,A,A,B,-,-,A,B,B,B,B,A,B,A,B,A,-,-,A,A,B,A,A,A,B,-,A,-,A,B,A,A,A,B,B,A,B,B,B,A,B,B,A,B,A,A,B,B,B,-,-,A,A,A,B,A,-,B,B,A,A,A,A,-,-,B,A,A,A,-,-,A,B,B,B,B,B,B,A,B,-,A,B,A,A,A,B,A,A,A,B,B,A,B,A,A,B,A,A,A,A,-,B,A,B,A,A,B,B,-,A,A,A,A,B,-,A,B,B,A,A,A,-,A,-,B,B,B,-,B,A,B,-,B,A,B,B,A,-,B,B,A,B,A,B,A,A,A,-,A,B,B,B,B,-,B,A,B,B
S15_243976,,-,A,-,B,B,A,-,A,B,B,B,A,A,B,-,B,A,B,B,B,B,A,-,A,B,A,B,B,A,A,-,A,A,A,B,A,A,-,A,B,A,A,A,B,B,A,-,B,B,A,B,B,A,B,A,A,B,B,B,B,B,A,-,A,B,A,A,-,B,A,A,A,A,-,-,B,A,A,A,-,B,A,B,B,B,B,-,-,A,B,B,A,B,A,A,A,B,A,A,A,B,B,A,B,A,A,B,A,A,A,A,-,B,A,B,A,A,B,B,B,A,A,A,A,B,A,A,B,B,A,A,A,B,A,A,-,B,B,B,B,A,B,-,B,A,B,B,A,-,B,B,A,B,A,B,A,A,A,B,A,B,B,B,A,-,B,A,B,B
S15_245169,,-,A,-,B,B,A,A,A,B,-,B,A,A,B,A,B,A,B,B,B,B,A,-,A,B,A,B,B,A,A,B,A,A,A,B,A,A,B,A,B,A,A,A,B,B,A,-,B,B,A,B,B,A,B,A,A,B,B,B,B,B,A,A,A,B,A,A,B,B,A,A,A,A,-,-,B,A,A,A,A,B,A,B,B,B,B,B,B,A,B,B,A,B,A,A,A,B,A,A,A,B,B,A,B,A,A,B,A,A,A,A,-,B,A,B,A,A,B,B,B,A,A,A,A,B,A,A,B,B,A,A,A,B,A,A,B,B,B,B,B,A,B,-,B,A,B,B,A,-,B,B,A,B,A,B,A,A,A,B,A,B,B,B,A,-,B,A,B,B
S15_246220,,-,A,-,B,B,A,A,A,B,A,B,A,A,B,A,B,A,B,B,B,B,A,B,A,B,A,B,B,A,A,B,A,A,A,B,A,A,B,A,B,A,A,A,B,-,A,-,B,B,A,B,B,A,B,A,A,B,B,B,B,B,A,-,A,B,-,A,B,B,A,A,A,A,-,A,B,A,A,A,-,B,A,B,B,B,B,B,B,A,B,B,A,B,A,A,A,B,A,A,A,B,B,A,B,A,A,B,A,A,A,A,-,B,A,B,A,A,B,B,-,A,A,A,A,B,A,A,B,B,A,A,A,B,A,A,-,B,B,-,B,A,B,-,B,A,B,B,A,-,B,B,A,B,A,B,A,A,-,B,A,B,B,B,A,-,B,A,B,B
S15_249674,,-,A,-,B,B,A,A,A,-,B,B,A,A,B,-,B,A,B,B,B,B,A,B,A,B,A,B,B,A,A,B,A,A,A,B,A,A,B,A,B,A,A,A,B,B,A,-,B,B,A,B,B,A,B,A,A,B,B,B,B,B,A,A,A,B,A,A,B,B,A,A,A,A,-,-,B,A,A,A,-,B,A,B,B,B,B,B,B,A,B,B,A,B,A,A,A,B,A,A,A,B,B,A,B,A,A,B,A,A,A,A,-,B,A,B,A,A,B,B,B,A,A,A,A,B,A,A,B,B,A,A,A,B,A,A,B,B,B,-,B,A,B,-,B,A,B,B,A,-,B,B,-,B,A,B,A,A,A,B,A,B,B,B,A,-,B,A,B,B
S15_255157,,-,A,-,B,B,A,A,A,B,-,B,A,A,B,A,B,A,B,B,B,B,A,B,A,B,A,B,B,A,A,B,A,A,A,B,A,A,B,A,B,A,A,A,B,B,A,-,B,B,A,B,B,A,B,A,A,B,B,B,B,B,A,A,A,B,A,A,B,B,A,A,A,A,A,-,B,A,A,A,A,B,A,B,B,B,B,B,B,A,B,B,A,B,A,A,A,B,A,A,A,B,B,A,B,A,A,B,A,A,A,A,-,B,A,B,A,A,B,B,B,A,A,A,A,B,A,A,B,B,A,A,A,B,A,A,B,B,B,-,B,A,B,-,B,A,B,B,A,-,B,B,A,B,A,B,A,A,A,B,A,B,B,B,A,-,B,A,B,B
S15_279516,,-,A,-,-,B,A,A,A,B,-,B,A,A,B,-,B,A,B,-,B,-,A,-,A,B,A,B,B,A,A,B,A,A,A,B,A,A,-,A,A,A,A,A,B,-,A,-,B,B,A,B,B,A,B,A,A,B,B,B,B,-,A,-,A,B,A,A,B,B,A,A,A,A,-,-,B,A,A,A,-,-,A,B,B,B,-,B,B,A,B,-,B,B,A,A,A,B,A,A,A,-,B,A,B,A,A,B,A,A,A,A,-,B,A,B,A,A,B,-,-,A,A,A,A,B,A,A,-,-,A,A,A,B,A,A,B,B,-,-,B,A,B,-,B,A,B,B,A,-,B,B,A,B,A,B,A,A,A,B,A,B,B,-,A,-,B,A,B,B
S15_292057,,-,A,-,B,B,A,A,A,B,-,B,A,A,B,-,B,A,B,B,B,B,A,-,A,B,A,B,B,A,A,B,A,A,A,B,A,A,B,A,A,A,A,A,B,B,A,-,B,B,A,B,B,A,B,A,A,B,B,B,B,B,A,-,A,B,A,A,B,B,A,A,A,A,A,-,B,A,A,A,-,B,A,B,B,B,B,B,B,A,B,B,B,-,A,A,A,B,A,A,A,B,B,A,B,A,A,B,A,A,A,A,-,B,A,B,A,A,B,B,B,A,A,A,A,B,A,A,B,B,A,A,A,B,A,A,B,B,B,B,B,-,B,-,B,A,B,B,A,-,B,B,A,B,A,B,A,A,A,B,A,B,B,B,A,-,B,A,B,B
S15_303257,,-,A,-,B,B,A,A,A,B,-,B,A,A,B,-,B,A,B,B,B,B,A,-,A,B,A,B,B,A,A,B,A,A,A,B,A,A,B,A,A,A,A,A,B,B,A,-,B,B,A,B,B,A,B,A,A,B,B,B,B,B,A,A,A,B,A,A,B,B,A,A,A,A,A,-,B,A,A,A,A,B,A,B,B,B,B,B,B,A,B,B,B,-,A,A,A,B,A,A,A,B,B,A,B,A,A,B,A,A,A,A,B,B,A,B,A,A,B,B,B,A,A,A,A,B,A,A,B,B,A,A,A,B,A,A,B,B,B,-,B,-,B,-,B,A,B,B,A,-,B,B,A,B,A,B,A,A,A,B,A,B,B,B,A,-,B,A,B,B
S15_306247,,-,A,-,B,B,A,A,A,B,-,B,A,A,B,A,B,A,B,B,B,B,A,A,A,B,A,B,B,A,A,B,A,A,A,B,A,A,B,A,A,A,A,A,B,B,A,-,B,B,A,B,B,A,B,A,A,B,B,B,B,B,A,A,A,B,A,A,B,B,A,A,A,A,-,-,B,A,A,A,A,B,A,B,B,B,B,B,B,A,B,B,B,-,A,A,A,B,A,A,A,B,B,A,B,A,A,B,A,A,A,A,-,B,A,B,A,A,B,B,B,A,A,A,A,B,A,A,B,B,A,A,A,B,A,A,B,B,B,B,B,B,B,-,B,A,B,B,A,-,B,B,A,B,A,B,A,A,A,B,A,B,B,B,A,-,B,A,B,B
S15_310146,,-,A,-,B,B,A,A,A,B,-,B,A,A,B,A,B,A,B,B,B,B,A,A,A,B,A,B,B,A,A,B,A,A,A,B,A,A,B,A,A,A,A,A,B,B,A,-,B,B,A,B,B,A,B,A,A,B,B,B,B,B,A,A,A,B,A,A,B,B,A,A,A,A,A,-,B,A,A,A,-,B,A,B,B,B,B,B,B,A,B,B,B,-,A,A,A,B,A,A,A,B,B,A,B,A,A,B,A,A,A,A,B,B,A,B,A,A,B,B,B,A,A,A,A,B,A,A,B,B,A,A,A,B,A,A,B,B,B,B,B,-,B,-,B,A,B,B,A,-,B,B,A,B,A,B,A,A,A,B,A,B,B,B,A,-,B,A,B,B
S15_311535,,-,A,-,B,B,A,A,A,B,-,B,A,A,B,A,B,A,B,B,B,B,A,A,A,B,A,B,B,A,A,B,A,A,A,B,A,A,B,A,A,A,A,A,B,B,A,-,B,B,A,B,B,A,B,A,A,B,B,B,B,B,A,A,A,B,A,A,B,B,A,A,A,A,A,-,B,A,A,A,A,B,A,B,B,B,B,B,B,A,B,B,B,-,A,A,A,B,A,A,A,B,B,A,B,A,A,B,A,A,A,A,-,B,A,B,A,A,B,B,B,A,A,A,A,B,A,A,B,B,A,A,A,B,A,A,B,B,B,B,B,B,B,-,B,A,B,B,A,-,B,B,A,B,A,B,A,A,A,B,A,B,B,B,A,-,B,A,B,B
S15_316763,,-,A,-,B,B,A,A,A,B,B,B,A,A,B,A,B,A,B,B,B,B,A,A,A,B,A,B,B,A,A,B,A,A,A,B,A,A,B,A,A,A,A,A,B,B,A,-,B,B,A,B,B,A,B,A,A,B,B,B,B,B,A,-,A,B,A,A,B,B,A,A,A,A,-,-,B,A,A,A,-,B,A,B,B,B,B,B,B,A,B,B,B,-,A,A,A,B,A,A,A,B,B,A,B,A,A,B,A,A,A,A,-,B,A,B,A,A,B,B,B,A,A,A,A,B,A,A,B,B,A,A,A,B,A,A,B,B,B,B,B,-,B,-,B,A,B,B,A,-,B,B,A,B,A,B,A,A,A,B,A,B,B,B,A,-,B,A,B,B
S15_421308,,-,B,-,B,B,A,A,B,B,-,B,A,A,B,A,B,B,B,B,B,B,A,A,A,B,A,B,B,A,B,B,A,A,A,B,A,A,-,A,A,A,A,A,B,B,A,-,B,B,A,B,B,A,B,B,A,B,B,B,B,B,A,A,A,B,A,A,B,B,A,A,A,A,-,-,B,A,A,A,-,B,A,B,B,B,B,B,B,A,A,B,B,-,A,A,A,A,A,A,A,B,B,A,B,A,A,B,A,A,A,A,B,B,A,B,A,A,B,B,B,A,A,B,-,B,A,A,B,B,B,A,A,B,A,A,B,B,B,B,B,-,B,-,B,A,B,B,A,-,B,B,A,B,A,B,A,A,A,B,A,B,B,B,A,-,B,A,B,B
S15_493527,,B,A,-,B,B,A,A,B,B,-,B,A,A,B,A,B,B,B,B,A,B,B,-,A,B,A,B,B,A,B,B,A,A,A,B,A,A,-,A,A,A,A,A,B,B,A,B,B,B,A,B,B,A,B,B,B,B,B,B,B,B,A,A,A,B,A,A,B,B,A,A,A,A,A,-,B,A,A,A,A,B,A,B,B,B,B,B,B,A,A,B,B,A,A,A,B,A,A,A,A,B,B,A,B,A,A,B,A,A,A,A,B,B,A,B,A,A,B,B,B,A,A,A,-,B,A,A,B,B,B,A,A,B,A,A,B,B,B,B,B,-,B,-,B,A,B,B,A,-,B,B,A,B,A,B,A,A,A,B,A,B,B,B,A,B,B,A,B,B
S15_534467,,B,A,-,B,B,A,A,B,B,A,B,A,A,B,A,B,B,B,B,A,B,B,-,A,B,A,B,B,A,B,B,A,A,A,B,A,A,-,A,A,A,A,A,B,B,A,B,B,B,A,B,B,A,B,B,B,B,B,B,B,B,A,A,A,B,A,A,B,B,A,A,A,A,A,-,B,A,A,A,-,B,A,B,B,B,B,B,B,A,A,B,B,A,A,A,B,A,A,A,A,B,B,A,B,A,A,B,A,A,A,A,-,B,A,B,A,A,B,B,B,A,A,A,-,B,A,A,B,B,B,A,A,B,A,A,-,B,B,B,B,B,B,-,B,A,B,B,A,-,B,B,A,B,A,B,A,A,A,B,A,B,B,B,A,-,B,A,B,B
S15_554545,,-,A,-,B,-,A,A,B,B,A,B,A,A,B,A,B,B,B,A,A,B,B,-,A,B,A,B,B,A,B,B,A,A,A,B,A,A,-,A,A,A,A,A,B,B,A,B,B,B,A,B,B,A,B,B,B,B,B,B,B,-,A,-,A,B,A,A,B,B,A,A,A,A,A,A,B,A,A,A,-,B,A,B,B,B,B,B,-,A,A,B,B,A,A,A,B,A,A,A,A,B,B,A,B,A,A,B,A,A,A,A,-,B,A,B,A,A,B,B,B,A,A,A,-,B,A,A,B,A,B,A,A,B,A,A,B,B,B,-,B,B,B,-,B,A,B,B,A,-,B,B,A,B,A,B,A,A,A,B,A,B,B,B,A,-,B,A,B,B
S15_590852,,B,A,-,B,B,A,A,B,B,-,B,A,A,B,A,B,B,B,A,A,B,B,B,A,B,A,B,B,A,B,B,A,A,A,B,A,A,-,A,A,A,A,A,B,B,A,B,B,B,A,B,B,A,B,B,B,B,B,B,B,B,A,A,A,B,A,A,B,B,A,A,A,A,-,-,B,A,A,A,A,B,A,B,B,B,B,B,B,A,A,B,B,A,A,A,B,A,A,A,A,B,B,A,B,A,A,B,A,A,A,A,-,B,A,B,A,A,B,B,B,A,A,A,-,B,A,A,B,A,B,A,A,B,A,A,B,B,B,B,B,-,B,-,B,-,B,B,A,-,B,B,A,B,A,B,A,A,A,B,A,B,B,B,A,-,B,A,B,B
S15_600921,,-,A,-,-,-,A,A,B,B,-,B,-,A,-,-,B,B,B,A,A,B,B,-,A,B,A,B,-,A,B,B,-,-,A,B,A,A,-,A,A,A,A,A,B,B,-,B,B,B,A,B,B,A,B,B,B,B,B,B,B,B,A,-,A,-,A,A,B,B,A,A,A,A,-,A,B,A,A,A,A,B,A,B,B,B,B,B,B,A,-,B,B,A,A,A,B,-,A,A,A,B,B,A,-,A,A,B,A,-,A,A,-,B,A,-,-,A,B,B,B,A,A,A,-,B,A,A,B,-,B,-,A,B,A,A,B,B,B,-,B,B,B,-,-,A,B,B,A,-,B,B,-,B,A,B,A,-,-,B,A,B,B,B,A,-,B,A,B,B
S15_633058,,-,A,-,B,B,A,A,B,B,-,B,A,A,B,A,B,B,B,A,A,B,B,-,A,B,A,B,B,A,B,B,A,A,A,B,A,A,A,A,A,A,A,A,B,B,A,B,B,B,A,B,B,A,B,B,B,A,B,B,B,B,A,A,A,B,A,A,B,B,A,A,A,A,A,-,B,A,A,A,A,B,A,B,B,B,B,B,B,A,A,B,B,A,A,A,B,A,A,A,A,B,B,A,-,A,A,B,A,A,A,A,B,B,A,B,A,A,B,B,B,A,A,A,-,B,A,A,B,A,B,A,A,B,A,A,B,B,B,-,B,-,B,-,B,A,B,B,A,B,B,B,A,B,A,B,A,A,A,B,A,B,B,B,A,-,B,A,B,B
S15_634456,,-,A,-,B,B,A,A,B,B,-,B,A,A,B,A,B,B,B,A,A,B,B,-,A,B,A,B,B,A,B,B,A,A,A,B,A,A,-,A,A,A,A,A,B,B,A,B,B,B,A,B,B,A,B,B,B,A,B,B,B,B,A,A,A,B,A,A,B,B,A,A,A,A,A,-,B,A,A,A,A,B,A,B,B,B,B,B,B,A,A,B,B,A,A,A,B,A,A,A,A,B,B,A,-,A,A,B,A,A,A,A,-,B,A,B,A,A,B,B,B,A,A,A,-,B,A,A,B,A,B,A,A,B,A,A,B,B,B,B,B,B,B,-,B,A,B,B,A,B,B,B,A,B,A,B,A,A,A,B,A,B,B,B,A,-,B,A,B,B
S15_673706,,-,A,-,B,B,A,A,B,B,-,B,A,A,B,A,B,B,B,A,A,B,B,B,A,B,A,B,B,A,B,B,A,A,A,B,A,A,B,A,A,A,A,A,B,B,A,B,B,B,A,B,B,A,B,B,B,A,B,B,B,B,A,-,A,B,A,A,B,B,A,A,A,A,-,-,B,A,A,A,-,B,A,B,B,B,B,B,B,A,A,B,B,A,A,A,B,A,A,A,A,B,B,A,A,A,A,B,A,A,A,A,-,B,A,B,A,A,B,B,B,A,A,A,-,B,A,A,B,A,B,A,A,B,A,A,B,B,B,-,B,B,B,-,B,A,B,B,A,-,B,B,A,B,A,B,A,A,A,B,A,B,B,B,A,-,B,A,B,B
S15_705808,,-,A,-,B,B,A,-,B,B,B,B,A,A,B,A,B,B,B,A,A,B,B,-,A,B,A,B,B,A,B,B,A,A,A,B,B,A,A,A,A,A,A,A,B,B,A,B,B,B,A,B,B,A,B,B,B,A,B,B,B,B,A,A,A,B,A,A,B,-,A,A,A,A,-,A,B,A,A,A,-,B,A,B,B,B,B,B,B,A,A,-,B,A,A,A,B,A,A,A,A,B,B,A,-,A,A,B,A,A,A,-,-,B,A,B,A,A,B,B,B,A,A,A,B,B,A,A,B,-,B,A,A,B,A,A,-,B,B,-,B,-,B,-,B,A,B,B,A,-,B,B,A,B,A,B,A,B,A,B,A,B,B,B,A,-,B,A,B,B
S15_710123,,-,A,-,-,-,A,A,B,B,-,-,-,A,B,A,B,B,B,-,A,B,B,-,A,B,A,B,-,A,B,B,A,A,A,B,B,A,A,A,A,A,A,A,B,-,A,B,B,B,A,-,B,A,B,B,B,A,B,B,B,B,A,-,A,B,A,A,B,B,A,A,A,A,-,A,B,A,A,A,-,B,A,B,B,B,-,B,B,A,A,-,B,A,A,A,B,A,A,A,A,B,B,A,A,A,A,B,A,A,A,A,-,B,A,B,A,A,B,B,B,A,A,A,B,B,A,A,B,A,B,A,A,B,A,A,B,B,-,-,B,-,B,-,B,A,B,B,A,-,B,B,-,B,A,B,A,B,A,B,A,B,B,B,A,-,B,A,B,B
S15_711153,,-,A,-,B,B,A,A,B,B,-,B,A,A,B,A,B,B,B,A,A,B,B,-,A,B,A,B,B,A,B,B,A,A,A,B,B,A,A,A,A,A,A,A,B,B,A,B,B,B,A,B,B,A,B,B,B,A,B,B,B,B,A,-,A,B,A,A,B,B,A,A,A,A,-,A,B,A,A,A,-,B,A,B,B,B,B,B,B,A,A,B,B,A,A,A,B,A,A,A,A,B,B,A,A,A,A,B,A,A,A,A,B,B,A,B,A,A,B,B,B,A,A,A,-,B,A,A,B,A,B,A,A,B,A,A,B,B,B,-,B,B,B,-,B,A,B,B,A,-,B,B,A,B,A,B,A,B,A,B,A,B,B,B,A,-,B,A,B,B
S15_715759,,-,A,-,B,B,A,A,B,B,-,B,A,A,B,A,B,B,B,A,A,B,B,B,A,B,A,B,B,A,B,B,A,A,A,B,B,A,-,A,A,A,A,A,B,B,A,B,B,B,A,B,B,A,B,B,B,A,B,B,B,B,A,A,A,B,A,A,B,B,A,A,A,A,A,A,B,A,A,A,A,B,A,B,B,B,B,B,B,A,A,B,B,A,A,A,B,A,A,A,A,B,B,A,A,A,A,B,A,A,A,A,-,B,A,B,A,A,B,B,B,A,A,A,-,B,A,A,B,A,B,A,A,B,A,A,B,B,B,B,B,-,B,-,B,A,B,B,A,-,B,B,A,B,A,B,A,B,A,B,A,B,B,B,A,-,B,A,B,B
S15_720591,,-,A,-,B,B,A,A,B,B,-,B,A,A,B,A,B,B,B,A,A,B,B,-,A,B,A,B,B,A,B,B,A,A,A,B,B,A,A,A,A,A,A,A,B,B,A,B,B,B,A,B,B,A,B,B,B,A,B,B,B,B,A,-,A,B,A,A,B,B,A,A,A,A,-,A,B,A,A,A,-,B,A,B,B,B,B,B,B,A,A,B,B,A,A,A,B,A,A,A,A,B,B,A,-,A,A,B,A,A,A,A,-,B,A,B,A,A,B,B,B,A,A,A,-,B,A,A,B,A,B,A,A,B,A,A,-,B,B,-,B,-,B,-,B,A,B,B,A,-,B,B,A,B,A,B,A,B,A,B,A,B,B,B,A,-,B,A,B,B
S15_723905,,-,A,-,B,B,A,A,B,B,-,B,A,A,B,A,B,B,B,A,A,B,B,-,A,B,A,B,B,A,B,B,A,A,A,B,B,A,A,A,A,A,A,A,B,B,A,B,B,B,A,B,B,A,B,B,B,A,B,B,B,B,A,A,A,B,A,A,B,B,A,A,A,A,A,A,B,A,A,A,-,B,A,B,B,B,B,B,B,A,A,B,B,A,A,A,B,A,A,A,A,B,B,A,A,A,A,B,A,A,A,A,-,B,A,B,A,A,B,B,B,A,A,A,-,B,A,A,B,A,B,A,A,B,A,A,B,B,B,B,B,-,B,-,B,A,B,B,A,B,B,B,A,B,A,B,A,B,A,B,A,B,B,B,A,-,B,A,B,B
S15_731583,,-,A,-,B,B,A,A,B,B,-,B,A,A,B,A,B,B,B,A,A,B,B,B,A,B,A,B,B,A,B,B,A,A,A,B,B,A,-,A,A,A,A,A,B,B,A,B,B,B,A,B,B,A,B,B,B,A,B,B,B,B,A,A,A,B,A,A,B,B,A,A,A,A,-,A,B,A,A,A,-,B,A,B,B,B,B,B,B,A,A,B,B,A,A,A,B,A,A,A,A,B,B,A,-,A,A,B,A,A,A,A,-,B,A,B,A,A,B,B,B,A,A,A,-,B,A,A,B,A,B,A,A,B,A,A,B,B,B,B,B,-,B,-,-,A,B,B,A,-,B,B,A,B,A,B,A,B,A,B,A,B,B,B,A,B,B,A,B,B
S15_783096,,-,A,-,B,B,A,A,B,B,-,B,A,A,B,A,B,B,B,A,A,B,B,B,A,B,A,B,B,A,B,B,A,A,A,B,B,A,-,A,A,A,A,A,B,B,A,B,B,B,A,B,B,A,B,B,B,A,B,B,B,B,A,-,B,B,A,A,B,B,A,A,A,A,A,A,B,A,A,A,A,B,A,B,B,B,B,B,B,A,A,B,B,A,A,A,B,A,A,B,A,B,B,A,A,A,A,B,A,A,A,A,-,B,A,B,A,A,B,B,B,A,A,A,-,B,A,A,B,A,B,A,A,B,A,A,B,B,B,B,B,-,B,-,B,A,B,B,A,-,B,B,A,B,A,B,A,B,A,B,A,B,B,B,A,-,B,A,B,B
S15_784290,,-,A,-,B,-,A,-,B,B,-,B,-,A,B,A,B,B,B,A,A,B,B,-,A,B,A,B,B,A,B,B,-,-,A,B,B,A,-,A,-,A,A,-,B,B,A,B,B,B,-,B,B,A,B,B,B,A,B,B,B,B,A,-,B,B,A,A,-,B,A,A,A,A,-,A,B,A,A,A,-,B,A,B,B,B,B,-,B,-,A,-,B,A,A,A,B,A,A,B,A,B,B,A,-,A,A,B,A,A,A,A,-,B,A,-,-,A,B,B,-,A,A,A,B,B,A,A,B,A,B,A,A,B,A,A,-,B,B,-,B,A,B,-,B,A,B,B,A,-,B,B,A,B,A,B,A,B,-,B,A,B,B,B,A,-,B,A,B,B
S15_788139,,-,A,-,B,B,A,A,B,B,A,B,A,A,B,-,B,B,B,A,A,B,B,-,A,B,A,B,B,A,B,B,A,-,A,B,B,A,-,A,A,A,A,A,B,-,A,B,B,B,A,B,B,-,B,B,B,A,B,B,B,B,A,-,B,B,A,A,B,B,A,A,A,A,-,A,B,A,A,A,-,B,A,B,B,B,B,B,-,A,A,B,B,A,A,A,B,-,A,B,A,B,B,A,-,A,-,B,A,A,A,A,-,B,A,B,A,A,B,B,-,A,A,-,-,B,A,A,B,-,B,A,A,B,A,-,-,B,B,-,B,B,B,-,B,A,B,B,A,-,B,B,A,B,A,B,-,B,A,B,A,B,B,-,A,-,B,A,B,B
S15_806347,,-,A,-,B,B,A,A,B,B,-,B,A,A,B,A,B,B,B,A,A,B,B,B,A,B,A,B,B,A,B,B,A,A,A,B,B,A,-,A,A,A,A,A,B,B,A,B,B,B,A,B,B,A,B,B,B,A,B,B,B,B,A,-,B,B,A,A,B,B,A,A,A,A,-,A,B,A,A,A,-,B,A,B,B,B,B,B,B,A,A,B,B,A,A,A,B,A,A,B,A,B,B,A,-,A,A,B,A,A,A,A,-,B,A,B,A,A,B,B,B,A,A,A,-,B,A,A,B,A,B,A,A,B,A,A,B,B,B,-,B,-,B,-,B,A,B,B,A,-,B,B,A,B,A,B,A,B,A,B,A,B,B,B,A,-,B,A,B,B
S15_808599,,-,A,-,B,B,A,A,B,B,A,B,A,A,B,A,B,B,B,A,A,B,B,-,A,B,A,B,B,A,B,B,A,A,A,B,B,A,B,A,A,A,A,A,B,B,A,B,B,B,A,B,B,A,B,B,B,A,B,B,B,B,A,A,B,B,A,A,B,B,A,A,A,A,A,A,B,A,A,A,A,B,A,B,B,B,B,B,B,A,A,B,B,A,A,A,B,A,A,B,A,B,B,A,-,A,A,B,A,A,A,A,-,B,A,B,A,A,B,B,B,A,A,A,-,B,A,A,B,A,B,A,A,B,A,A,B,B,B,B,B,-,B,-,B,A,B,B,A,-,B,B,A,B,A,B,A,B,A,B,A,B,B,B,A,-,B,A,B,B
S15_891587,,-,A,-,B,B,A,B,B,B,A,B,A,A,B,A,B,B,B,A,A,B,B,A,A,B,A,B,B,A,B,B,A,A,A,B,B,A,A,A,A,A,A,A,B,B,A,B,B,B,A,B,B,A,B,B,B,A,B,B,B,B,A,A,B,B,A,A,B,B,A,A,A,A,A,A,B,A,A,A,-,B,A,B,B,B,B,B,B,A,A,B,B,A,A,A,B,A,A,B,A,B,B,A,-,A,A,B,A,A,A,A,-,B,A,B,A,A,B,B,B,A,A,A,-,B,A,A,B,A,B,A,A,B,A,A,B,B,B,-,B,-,B,-,B,A,B,B,A,-,B,B,A,B,A,B,A,B,A,B,A,B,B,B,A,B,B,A,B,B
S15_901306,,-,A,-,B,-,A,B,B,-,A,B,A,A,B,A,B,B,B,-,A,B,B,-,A,B,A,B,-,A,B,-,A,A,A,B,B,A,-,A,A,A,A,A,B,-,A,B,B,B,A,B,B,A,B,B,B,A,B,B,B,B,A,-,B,B,A,A,B,B,A,A,A,A,-,A,B,A,A,A,-,B,A,B,B,B,B,B,B,A,A,B,-,A,A,A,B,A,A,B,A,B,-,-,A,A,A,B,A,A,A,A,-,B,A,-,A,A,B,B,-,A,A,A,-,B,-,A,B,-,B,A,A,B,A,A,B,-,B,-,B,B,B,-,B,A,B,B,A,-,B,B,A,-,A,B,A,B,-,B,A,B,B,B,A,-,-,A,B,-
S15_947260,,-,B,-,-,-,A,B,B,B,B,B,-,A,B,-,B,B,B,A,A,B,B,A,A,A,A,B,B,A,B,B,-,A,A,B,B,A,-,A,A,A,A,A,B,B,A,B,B,B,A,B,B,A,B,A,B,A,B,B,B,B,A,-,B,B,A,-,B,B,A,A,A,A,-,A,B,A,A,A,-,B,A,B,B,B,-,-,B,A,A,B,B,A,A,B,A,A,A,B,A,B,B,A,-,A,A,A,A,A,A,A,-,A,A,B,A,A,B,-,-,A,A,A,B,B,B,A,B,-,B,A,B,B,A,A,-,B,B,-,B,B,B,-,B,A,B,B,A,-,B,B,A,B,A,B,A,B,A,B,A,B,B,B,A,-,B,A,B,B
S15_950370,,-,B,-,B,B,A,B,B,B,B,B,A,A,B,A,B,B,B,A,A,B,B,-,A,A,A,B,-,A,B,B,A,A,A,B,B,A,A,A,A,A,A,A,B,B,A,B,B,B,A,B,B,A,B,A,B,A,B,B,B,B,A,A,B,B,A,B,B,B,A,A,A,A,-,-,B,A,A,A,-,B,A,B,B,B,B,B,B,A,A,B,B,A,A,B,A,A,A,B,A,B,B,A,A,A,A,A,A,A,A,A,-,A,A,B,-,A,B,B,B,A,A,A,B,B,B,A,B,A,B,A,B,B,A,A,-,B,B,-,B,-,B,-,B,A,B,B,A,-,B,B,-,B,A,B,A,B,A,B,A,B,B,B,A,-,B,A,B,B
S15_953259,,-,B,-,B,B,A,B,B,B,B,B,-,A,B,A,B,B,B,A,A,B,B,-,A,A,A,B,-,A,B,-,A,-,A,B,B,A,A,A,A,A,A,A,B,B,A,B,-,B,A,B,B,A,B,-,B,A,B,B,B,B,A,-,B,B,A,B,B,B,A,A,-,A,-,-,B,A,A,A,-,B,A,B,B,B,B,B,-,A,-,B,B,A,A,B,A,A,A,B,-,B,B,A,A,A,A,A,-,A,-,A,-,A,A,B,-,A,B,B,B,A,A,A,-,B,B,A,B,-,B,-,B,B,A,A,-,B,B,-,B,-,B,-,B,A,-,B,A,-,B,B,-,B,A,B,A,B,-,-,A,B,B,B,A,-,B,A,B,B
S15_1039150,,-,B,-,B,B,A,B,B,B,B,B,-,A,B,A,B,B,B,A,A,B,B,-,A,A,A,B,B,A,B,B,-,-,A,B,B,-,B,A,A,A,A,A,B,-,A,B,-,B,-,B,B,A,B,A,B,A,-,B,B,B,A,-,B,B,-,B,B,B,A,A,A,A,-,-,B,A,A,A,-,B,A,B,B,B,B,B,-,A,A,B,B,B,A,-,A,-,A,B,A,B,B,A,-,A,A,A,A,A,A,A,-,A,A,B,-,A,B,B,B,A,A,A,B,B,-,A,B,A,B,A,B,B,A,-,B,B,B,-,B,B,B,-,B,A,B,B,A,-,B,B,A,-,A,B,A,B,-,B,A,A,B,B,A,-,B,-,B,B
S15_1064482,,B,B,-,B,B,A,B,B,B,B,B,A,A,B,A,B,B,B,A,A,B,B,A,A,A,A,B,B,A,B,B,A,A,A,B,B,A,A,A,A,A,A,A,B,B,A,B,B,B,A,B,B,A,B,A,B,A,B,B,B,B,A,A,B,B,A,B,B,B,A,A,A,A,A,-,B,A,A,A,B,B,A,B,B,B,B,B,B,A,A,B,B,B,A,B,A,A,A,B,A,B,B,A,-,A,A,A,A,A,A,A,B,A,A,B,A,A,B,B,B,A,A,A,B,B,B,A,B,A,B,A,B,B,A,B,B,B,B,A,B,-,B,-,B,A,B,B,A,-,B,B,A,B,A,B,A,B,A,B,A,A,B,B,A,-,B,A,B,B
S15_1073925,,-,B,-,B,B,A,B,B,B,B,B,B,A,B,A,B,B,B,A,A,B,B,-,A,A,A,B,B,A,B,B,A,A,A,B,B,A,A,A,A,A,A,A,B,B,A,A,B,B,A,B,B,A,B,A,B,A,B,B,B,B,A,A,B,B,A,B,B,B,A,A,A,A,-,-,B,A,A,A,B,A,A,B,B,B,B,B,B,A,A,-,B,B,A,B,A,A,A,B,A,B,B,A,A,A,A,A,A,A,A,A,-,A,A,B,-,A,B,B,B,A,A,A,A,B,B,A,B,A,B,A,B,B,A,B,B,B,B,A,B,-,B,-,B,A,B,B,A,-,B,B,A,B,A,B,A,B,A,B,A,A,B,B,A,-,B,A,B,B
S15_1077489,,-,B,-,B,B,A,B,B,B,B,B,B,A,B,-,B,B,B,A,A,B,B,-,A,A,A,B,B,A,B,B,A,A,A,B,B,A,-,A,A,A,A,A,B,B,A,A,B,B,A,B,B,A,B,A,B,A,B,B,B,B,A,-,B,B,A,-,B,B,A,A,A,A,-,B,B,A,A,A,-,A,A,B,B,B,B,B,B,A,A,B,B,B,A,B,A,A,A,B,A,B,B,A,-,A,A,A,A,-,A,A,-,A,A,B,A,A,B,B,B,A,A,A,B,B,B,A,B,A,B,A,B,B,A,B,B,B,B,-,B,A,B,-,B,-,B,B,A,-,B,A,A,B,A,B,A,B,-,B,A,A,B,B,A,-,B,A,B,B
S15_1078789,,-,B,-,B,B,A,B,B,B,B,B,B,A,B,-,B,B,B,A,A,B,B,-,A,A,A,B,B,A,B,B,A,A,A,-,B,A,A,A,A,A,A,A,B,B,A,A,B,B,A,B,B,A,B,A,B,A,B,B,B,B,A,-,B,B,A,B,B,B,A,A,A,A,-,A,B,A,A,A,-,A,A,B,B,-,B,B,-,A,A,-,B,B,A,B,A,A,A,B,A,B,B,A,A,A,A,A,A,-,A,A,B,A,A,B,A,A,B,B,B,A,A,A,B,B,B,A,B,A,B,A,B,B,A,B,B,B,B,-,B,-,B,-,B,A,B,B,A,-,B,A,A,B,A,B,A,B,A,B,A,A,B,B,A,-,B,-,B,B
S15_1085859,,-,B,-,B,B,A,B,B,-,B,B,B,A,B,A,B,B,B,A,A,B,B,A,A,A,A,B,B,A,B,B,A,A,A,B,B,A,A,A,A,A,A,A,B,B,A,A,B,B,A,B,B,A,B,A,B,A,B,B,B,B,A,A,B,B,A,B,B,B,A,A,A,A,-,A,B,A,A,A,-,A,A,B,-,B,B,B,B,A,A,B,B,B,A,B,A,A,A,B,A,B,B,A,A,A,A,A,A,A,A,A,-,A,A,B,A,A,B,B,B,A,A,A,B,B,B,A,B,A,B,A,B,-,A,B,B,B,B,A,B,-,B,-,B,A,B,B,A,-,B,A,A,B,A,B,A,B,A,B,A,A,B,B,A,-,B,A,B,-
S15_1087778,,-,B,-,B,B,A,B,B,B,B,B,B,A,B,A,B,B,B,A,A,B,B,A,A,A,A,B,B,A,B,B,A,A,A,B,B,A,-,A,A,A,A,A,B,B,A,A,B,B,A,B,B,A,B,A,B,A,B,B,B,B,A,A,B,B,A,B,B,B,A,A,A,A,A,A,B,A,A,A,-,A,A,B,B,B,B,B,B,A,A,B,B,B,A,B,A,A,A,B,A,B,B,A,A,A,A,A,A,A,A,A,-,A,A,B,A,A,B,B,B,A,A,A,B,B,B,A,B,A,B,A,B,B,A,B,B,B,B,A,B,-,B,-,B,A,B,B,A,-,B,A,A,B,A,B,A,B,A,B,A,A,B,B,A,-,B,A,B,B
S15_1091356,,-,B,-,B,B,A,B,B,B,B,B,B,A,B,-,B,B,B,A,A,B,B,-,A,A,A,B,-,A,B,-,A,-,A,B,B,A,-,A,A,A,A,A,B,-,A,A,B,B,A,B,B,A,B,A,B,A,B,B,B,B,A,-,B,B,A,B,B,B,A,A,A,A,A,A,B,A,A,A,-,A,-,B,B,B,B,B,B,A,A,B,B,B,A,B,A,A,A,B,A,B,B,A,-,A,A,A,A,A,A,A,-,A,A,B,A,A,B,B,B,A,A,A,B,B,B,A,B,-,B,A,B,B,A,B,B,B,B,-,B,-,B,-,B,A,B,B,A,-,B,A,A,-,A,B,A,B,-,B,A,A,B,B,A,-,B,A,B,-
S15_1098653,,-,B,-,B,-,A,-,B,B,B,B,-,A,-,A,B,B,B,A,A,B,B,-,A,A,A,B,B,A,B,B,A,A,A,B,B,A,-,A,A,A,A,A,B,B,A,A,B,B,A,B,B,A,B,A,B,A,B,B,B,-,A,-,B,B,-,B,B,B,A,A,A,A,-,A,B,A,A,A,-,A,A,B,B,B,B,B,B,A,A,B,B,B,A,B,A,A,A,B,-,B,B,A,-,A,-,A,A,A,A,A,-,-,A,B,-,A,B,B,-,A,A,A,B,B,B,A,B,-,B,A,B,B,A,B,-,B,B,-,B,A,B,-,B,A,B,B,A,-,B,A,-,B,A,B,A,B,A,B,-,A,B,B,A,-,B,A,B,B
S15_1102301,,B,B,-,B,B,A,B,B,B,B,B,B,A,B,A,B,B,B,A,A,B,B,A,A,A,A,B,B,A,B,B,A,A,A,B,B,A,-,A,A,A,A,A,B,B,A,A,B,B,A,B,B,A,B,A,B,A,B,B,B,B,A,A,B,B,A,B,B,B,A,A,A,A,A,A,B,A,A,A,B,A,A,B,B,B,B,B,B,A,A,B,B,B,A,B,A,A,A,B,A,B,B,A,A,A,A,A,A,A,A,A,B,A,A,B,A,A,B,B,B,A,A,A,B,B,B,A,B,A,B,A,B,B,A,B,B,B,B,A,B,-,B,-,B,A,B,B,A,-,B,A,A,B,A,B,A,B,A,B,A,A,B,B,A,-,B,A,B,B
S15_1121723,,B,B,-,B,B,A,B,B,B,B,B,B,A,B,A,B,B,B,A,A,B,B,A,A,A,A,B,B,A,B,B,A,A,A,B,B,A,A,A,A,A,A,A,B,B,A,A,B,B,A,B,B,A,B,A,B,A,B,B,B,B,A,A,B,B,A,B,B,B,A,A,A,A,A,A,B,A,A,A,B,A,A,B,B,B,B,B,B,A,A,B,B,B,A,B,A,A,A,B,A,B,B,A,-,A,A,A,A,A,A,A,B,A,A,A,A,A,B,B,B,A,A,A,B,B,B,A,B,A,B,A,B,B,A,B,B,B,B,-,B,-,B,-,B,A,B,B,A,-,B,A,A,B,A,B,A,B,A,B,A,A,B,B,A,-,B,A,B,B
S15_1153522,,-,B,-,B,B,A,B,B,B,B,B,B,A,B,A,B,B,B,A,A,B,B,A,A,A,A,B,B,A,B,B,A,A,A,B,B,A,-,A,A,A,A,A,B,B,A,A,B,B,A,B,B,A,B,A,B,A,B,B,B,B,A,A,B,B,A,B,B,B,A,A,A,A,-,A,B,A,A,A,-,A,A,B,B,B,B,B,B,A,A,B,B,B,A,B,A,A,A,B,A,B,B,A,-,A,A,A,A,A,A,A,-,A,A,A,A,A,B,B,B,A,A,A,B,B,B,A,B,A,B,A,B,B,A,B,B,B,B,-,B,-,B,-,B,A,B,B,A,-,B,A,A,B,A,B,A,B,A,B,A,A,B,B,A,B,B,A,B,B
S15_1160753,,-,B,-,B,B,A,B,B,B,B,B,B,A,B,A,B,B,B,A,A,B,B,A,A,A,A,B,B,A,B,B,A,A,A,B,B,A,-,A,A,A,A,A,B,B,A,A,B,B,A,B,B,A,B,A,B,A,B,B,B,B,A,A,B,B,A,B,B,B,A,A,A,A,A,A,B,A,A,A,-,A,A,B,B,B,B,B,B,A,A,B,B,B,A,B,A,A,A,B,A,B,B,A,A,A,A,A,A,A,A,A,B,A,A,A,A,A,B,B,B,A,A,A,B,B,B,A,B,A,B,A,B,B,A,B,B,B,B,A,B,-,B,-,B,A,B,B,A,-,B,A,A,B,A,B,A,B,A,B,A,A,B,B,A,-,B,A,B,B
S15_1164440,,-,B,-,B,B,A,B,B,B,-,B,B,A,B,A,B,B,B,A,A,B,B,A,A,A,A,B,B,A,B,B,A,A,A,B,B,A,-,A,A,A,A,A,B,-,A,A,B,B,A,B,B,A,B,A,B,A,B,B,B,B,A,A,B,B,A,B,B,B,A,A,A,A,-,A,B,A,A,A,B,A,A,B,B,B,B,B,B,A,A,B,B,B,A,B,A,A,A,B,A,B,B,A,A,A,A,A,A,A,A,A,-,A,A,A,A,A,B,B,B,A,A,A,B,B,B,A,B,A,B,A,B,B,A,B,-,B,B,-,B,-,B,-,B,A,B,B,A,-,B,A,A,B,A,B,A,B,A,B,A,A,B,B,A,-,B,A,B,-
S15_1166401,,-,B,-,B,B,A,B,B,B,B,B,B,A,B,A,B,B,B,A,A,B,B,-,A,A,A,B,B,A,B,B,A,A,A,B,B,A,-,A,A,A,A,A,B,B,A,A,B,B,A,B,B,A,B,A,B,A,B,B,B,B,A,A,B,B,A,B,B,B,A,A,A,A,A,A,B,A,A,A,-,A,A,B,B,B,B,B,B,A,A,B,B,B,A,B,A,A,A,B,A,B,B,A,-,A,A,A,A,A,A,A,B,A,A,A,A,A,B,B,B,A,A,A,B,B,B,A,B,A,B,A,B,B,A,B,B,B,B,A,B,-,B,-,B,A,B,B,A,-,B,A,A,B,A,B,A,B,A,B,A,A,B,B,A,-,B,A,B,B
S15_1205269,,-,B,-,-,-,A,B,B,B,B,B,B,A,B,A,B,B,B,A,A,B,B,-,A,A,A,B,A,A,B,B,B,A,A,B,B,A,A,A,A,A,A,A,B,B,A,A,B,B,A,B,B,A,B,A,B,A,B,B,B,B,A,-,B,B,-,B,B,B,A,A,A,A,-,A,B,A,A,A,B,A,A,B,B,B,-,B,B,A,A,B,B,B,A,B,A,A,A,B,A,B,B,A,A,A,A,A,A,A,A,A,-,A,A,-,A,A,B,B,B,A,A,A,B,B,-,A,B,A,B,A,B,B,A,B,B,B,B,-,B,A,B,-,B,A,B,B,A,-,B,A,A,B,A,B,A,B,-,B,B,A,B,B,A,-,B,A,B,B
S16_60118,,-,B,-,B,-,-,A,B,B,B,B,A,A,A,-,A,A,A,B,B,A,B,-,B,A,B,B,A,A,A,A,A,-,B,B,A,B,B,B,B,A,B,A,-,-,A,B,A,A,B,A,A,B,A,A,-,A,B,A,A,B,B,B,B,A,-,A,A,A,A,B,A,A,-,A,B,A,A,A,-,B,B,A,A,B,A,B,B,A,A,A,A,B,B,A,A,A,A,B,B,A,A,B,B,A,B,B,A,A,A,B,-,A,B,B,A,A,A,B,-,B,B,B,A,B,B,B,B,A,A,A,A,A,A,A,A,A,A,-,B,A,A,-,A,A,A,B,B,-,A,B,A,B,B,A,A,A,A,A,B,B,-,A,B,-,A,A,B,A
S16_90767,,-,B,-,B,A,-,A,B,B,B,B,A,A,A,B,A,A,A,B,B,A,B,A,B,A,B,B,A,A,A,A,A,A,B,B,A,B,A,B,B,A,B,A,A,B,A,B,A,A,B,A,A,B,A,A,-,A,B,A,A,B,B,B,B,A,B,A,A,A,A,B,A,A,-,A,B,A,A,B,-,B,B,A,A,B,A,B,B,A,A,-,A,B,B,A,A,B,A,B,B,A,A,B,B,A,B,B,A,A,A,B,-,A,B,B,A,A,A,B,B,B,B,B,A,B,B,-,B,A,A,A,A,A,A,A,B,A,A,-,B,A,A,-,A,A,A,B,B,-,A,B,A,B,B,A,A,A,A,A,B,B,-,A,B,A,A,A,B,A
S16_95360,,-,B,-,B,A,-,A,B,B,B,B,-,A,A,B,A,A,A,B,B,A,B,-,B,A,B,B,A,A,A,A,A,-,B,B,A,B,A,B,B,A,B,A,A,B,A,B,A,A,B,A,A,B,A,A,A,A,B,A,A,B,B,-,B,A,-,A,A,A,A,B,A,A,A,A,B,A,A,B,-,B,B,A,A,B,A,B,B,A,A,-,A,B,B,A,A,B,A,B,B,A,A,B,B,A,B,B,A,A,A,B,-,A,B,B,A,A,A,B,B,B,B,B,A,B,B,B,B,A,A,A,A,A,A,A,B,A,A,B,B,A,A,-,A,A,A,B,B,-,A,B,A,B,B,A,A,A,A,A,B,B,-,A,B,-,A,A,B,A
S16_152771,,-,B,-,B,A,-,A,B,B,B,B,A,A,A,B,A,A,A,B,B,A,B,-,B,A,B,B,A,A,A,A,A,A,B,B,A,B,A,B,B,A,B,A,A,B,A,B,A,A,B,A,A,B,A,A,-,A,B,A,A,B,B,B,B,A,-,A,A,A,A,B,A,A,-,A,B,A,A,B,-,B,B,A,A,B,A,B,B,A,A,B,A,B,B,A,A,B,A,B,B,A,A,B,B,A,B,B,A,A,A,B,-,A,B,B,A,A,A,B,B,B,B,B,A,B,B,-,B,A,A,A,A,A,A,A,B,A,A,B,B,A,A,-,A,A,A,B,B,B,B,B,A,B,B,A,A,A,A,A,B,B,-,A,B,-,A,A,B,A
S16_156797,,-,B,-,B,A,A,A,B,B,B,B,A,A,A,-,A,A,A,B,B,A,B,-,B,A,B,B,A,A,A,A,A,A,B,B,A,B,A,B,B,A,B,A,A,-,A,B,A,A,B,A,A,B,A,A,A,A,B,A,A,B,-,-,B,A,A,A,A,A,A,B,A,A,-,A,B,A,A,B,-,B,B,A,A,B,A,B,B,A,A,B,A,B,B,A,A,B,A,B,B,A,A,B,B,A,B,B,A,A,A,B,-,A,B,B,A,A,A,B,B,B,B,B,A,B,B,-,B,A,A,A,A,A,A,A,B,A,A,-,B,A,A,-,A,A,A,B,B,-,B,B,A,B,B,A,A,A,A,A,B,B,-,A,B,-,A,A,B,A
S16_207435,,-,B,-,-,A,B,A,-,B,B,B,-,A,A,B,A,A,A,B,B,-,B,-,B,A,B,B,A,A,A,-,A,-,B,B,A,B,-,B,B,B,B,A,A,B,A,B,A,A,B,A,A,B,A,A,-,A,B,A,A,B,B,-,B,A,B,A,A,A,A,B,A,A,-,A,-,A,A,B,-,B,B,A,A,B,A,B,B,A,B,B,A,B,B,A,A,B,A,B,B,-,A,B,B,A,B,B,A,A,A,B,-,A,B,B,-,-,A,B,B,B,B,B,A,B,B,B,B,A,A,A,A,A,A,-,B,A,A,B,B,-,A,-,A,A,A,B,B,-,B,B,-,B,B,A,-,A,A,A,B,B,-,A,B,-,A,A,B,A
S16_222398,,-,B,-,B,A,-,A,B,B,B,B,A,A,A,B,A,A,A,B,B,A,B,B,B,A,B,A,A,A,A,A,A,A,B,B,A,B,A,B,B,B,B,A,A,B,A,B,A,A,B,A,A,B,A,A,A,A,B,A,A,B,B,-,B,A,-,A,A,A,A,B,A,A,-,A,B,A,A,B,-,B,B,A,A,B,A,B,B,A,B,B,A,B,B,A,A,B,A,B,B,A,A,B,B,A,B,B,A,A,A,B,-,A,B,B,A,A,A,B,B,B,B,B,A,B,B,B,B,A,A,A,A,A,A,A,B,A,A,-,B,-,A,-,A,A,A,B,B,-,B,B,A,B,B,A,A,A,A,A,B,B,-,A,B,-,A,A,B,A
S16_232093,,-,B,-,-,-,-,A,B,B,B,B,A,A,A,-,A,A,A,B,B,A,B,B,B,A,B,A,A,A,A,A,A,A,B,B,A,-,A,-,B,B,B,A,A,-,A,-,A,A,B,-,A,B,A,A,A,A,B,A,A,B,B,-,B,A,-,A,A,A,A,B,A,A,A,A,B,A,A,B,-,B,-,A,A,B,A,-,B,A,B,-,A,A,-,A,A,-,A,B,-,A,A,B,B,A,B,B,A,A,A,B,-,A,B,B,A,A,A,B,-,B,-,-,A,B,B,B,B,A,A,A,A,A,A,A,-,A,A,-,B,-,A,-,A,A,A,B,-,-,-,B,-,B,B,A,A,A,-,A,B,B,-,A,B,-,A,A,B,A
S16_264056,,-,B,-,B,A,-,A,-,B,B,B,A,A,A,B,A,A,A,B,B,A,B,-,B,A,B,B,A,A,A,A,A,A,B,B,A,B,A,B,B,B,B,A,A,B,A,B,A,A,B,A,A,B,A,B,-,A,B,A,A,-,B,-,B,A,-,A,A,A,A,B,A,A,-,A,B,A,A,B,-,B,B,A,A,B,-,B,B,A,B,-,A,-,B,A,A,B,A,B,B,A,A,B,B,A,B,B,A,A,A,B,-,A,B,B,A,A,A,B,B,B,B,B,A,B,B,-,B,A,A,A,A,A,A,A,B,A,A,-,B,-,A,-,A,A,A,B,B,-,B,B,-,B,B,A,A,A,-,A,B,B,-,A,B,-,A,A,B,A
S16_265629,,-,B,-,B,A,-,A,B,B,B,B,A,A,A,-,A,A,A,B,-,A,B,-,B,A,B,B,A,A,A,A,A,A,B,B,A,B,A,B,-,B,B,A,A,-,A,B,A,A,B,-,A,B,A,B,-,-,B,-,A,B,B,-,B,A,B,A,A,A,-,B,A,A,-,A,B,A,A,B,-,B,B,A,A,B,B,B,B,A,B,B,A,-,B,A,A,B,A,B,B,A,A,B,B,A,B,B,A,A,A,B,-,A,B,B,A,A,A,-,B,B,B,B,A,B,B,-,B,A,A,A,A,A,A,A,B,A,A,-,B,-,A,-,A,A,A,B,B,-,B,B,-,B,B,A,A,A,A,A,B,B,-,A,B,A,A,A,B,A
S16_266652,,-,B,-,B,A,-,A,B,B,B,B,A,A,A,B,A,A,A,B,B,A,B,-,B,A,B,B,A,A,A,A,A,A,B,B,A,B,A,B,B,B,B,A,A,B,A,B,A,A,B,A,A,B,A,B,A,A,B,A,A,B,B,-,B,A,-,A,A,A,A,B,A,A,-,A,B,A,A,B,B,B,B,A,A,B,B,B,B,A,B,B,A,-,B,A,A,B,A,B,B,A,A,B,B,A,B,B,A,A,A,B,-,A,B,B,A,A,A,B,B,B,B,B,A,B,B,-,B,A,A,A,A,A,A,A,B,A,A,-,B,-,A,-,A,A,A,B,B,-,B,B,-,B,B,A,A,A,A,A,B,B,-,A,B,-,A,A,B,A
S16_292582,,-,B,-,B,A,-,A,B,B,B,B,A,A,A,B,A,A,A,B,B,A,B,-,B,A,B,B,A,A,A,A,A,A,B,B,A,B,A,B,B,B,B,A,A,B,A,B,A,A,B,A,A,B,A,B,-,A,B,A,A,B,B,B,B,A,-,A,A,A,A,B,A,A,B,A,B,A,A,B,-,B,B,A,A,B,B,B,B,A,B,B,A,-,B,A,A,B,A,B,B,A,A,B,B,A,B,B,A,A,A,B,-,A,B,B,A,A,A,B,B,B,B,B,A,B,B,-,B,A,A,A,A,A,A,A,B,A,A,B,B,-,A,-,A,A,A,B,B,-,B,B,A,B,B,A,A,A,A,A,B,B,-,A,B,-,A,A,B,A
S16_399210,,-,B,-,B,A,A,A,B,B,B,B,A,A,A,B,A,A,A,B,B,-,B,-,B,A,B,B,A,B,B,A,A,A,B,B,A,B,A,B,B,A,B,A,A,B,A,B,A,A,B,A,A,B,A,A,A,A,B,A,A,B,B,B,B,A,-,A,B,A,A,B,B,A,-,A,B,A,A,B,B,B,B,A,A,B,B,B,B,A,B,B,A,-,B,A,A,B,A,B,B,A,A,B,B,A,B,B,A,A,A,B,-,A,B,B,B,A,A,A,A,B,B,B,A,B,B,B,B,A,A,A,A,A,A,A,B,B,A,B,B,-,A,A,A,A,A,B,B,-,B,B,A,B,B,A,A,A,A,A,B,B,-,A,B,-,A,A,B,A
S16_405241,,-,B,-,B,-,A,A,B,B,B,B,A,A,A,B,A,A,A,B,B,B,B,-,B,A,B,B,-,B,B,A,A,A,B,B,A,B,A,B,B,A,B,A,A,B,A,B,A,A,B,A,A,B,A,A,-,A,B,A,A,B,B,B,B,A,-,A,B,A,A,B,B,A,-,A,B,A,A,B,B,B,B,A,A,B,B,B,B,A,B,B,A,B,B,A,A,B,A,B,B,A,A,B,B,A,B,B,A,A,A,B,-,A,B,B,B,A,A,A,A,B,B,B,A,B,B,B,B,A,A,A,A,A,A,A,B,B,A,-,B,-,A,-,A,A,A,B,B,-,B,B,A,B,B,A,A,A,A,A,B,B,-,A,B,-,A,A,B,A
S16_459581,,-,B,-,B,-,A,-,B,B,B,B,A,A,A,B,A,A,A,B,B,B,A,B,B,A,B,B,-,B,B,A,A,A,B,B,A,B,-,B,B,A,B,A,A,B,-,B,-,A,B,A,-,B,A,A,-,A,B,A,A,B,B,B,B,A,B,A,A,A,A,B,B,A,-,-,B,A,A,B,-,B,B,A,-,B,A,B,B,A,B,B,A,B,B,-,A,B,-,B,A,A,A,B,B,A,B,B,A,A,A,B,-,A,B,B,B,A,A,A,A,B,B,B,A,B,B,B,B,-,A,A,A,A,A,-,-,B,A,-,B,B,-,-,-,A,A,A,B,-,B,B,A,B,B,A,A,A,-,A,B,B,B,-,B,-,A,A,B,-
S16_515476,,-,B,-,B,A,A,A,B,B,-,B,A,A,A,-,A,A,A,B,B,-,A,-,B,A,B,B,-,B,B,-,A,A,B,B,A,B,-,B,B,A,B,A,A,B,A,B,A,A,B,B,A,B,A,A,A,A,B,A,A,B,B,-,B,A,-,A,A,A,A,B,B,A,-,A,B,A,A,B,-,B,B,A,-,B,B,B,B,A,B,B,A,-,B,A,A,B,A,B,A,A,A,B,B,A,B,B,A,A,A,B,-,A,B,B,B,A,A,A,A,B,B,B,A,B,B,B,B,-,A,A,B,A,A,A,B,B,A,-,B,-,A,-,A,A,A,A,B,-,B,B,-,B,B,A,A,A,-,A,B,B,B,A,B,-,A,A,B,-
S16_518909,,-,B,-,B,A,A,A,B,B,B,B,A,A,A,B,A,A,A,B,B,A,A,-,B,A,B,B,A,B,B,A,A,A,B,B,A,B,A,B,B,A,B,A,A,-,A,B,A,A,B,B,A,B,A,A,A,A,B,A,A,B,B,-,B,A,-,A,A,A,A,B,B,A,-,A,B,A,A,B,-,B,B,A,A,B,B,B,B,A,B,B,A,A,B,A,A,B,A,B,A,A,A,B,B,A,B,B,A,A,A,B,-,A,B,B,B,A,A,A,A,B,B,B,A,B,B,B,B,A,A,A,B,A,A,A,B,B,A,-,B,-,A,-,A,A,A,A,B,-,B,B,A,B,B,A,A,A,A,A,B,B,B,A,B,-,A,A,B,A
S16_558003,,-,B,-,B,A,A,A,B,B,B,-,A,A,A,-,A,A,A,B,B,A,A,-,B,A,B,B,A,B,B,A,A,A,B,B,A,B,A,B,B,A,B,A,A,B,A,B,A,A,B,B,A,B,A,A,A,A,B,A,A,B,B,B,B,A,A,A,A,A,A,B,B,A,B,A,B,A,A,B,B,B,B,A,A,B,B,B,B,A,B,B,A,-,B,A,A,B,A,B,A,A,A,B,B,A,B,B,A,A,A,B,A,A,B,B,B,A,A,A,A,B,B,B,A,B,B,B,B,A,A,A,B,A,A,A,B,B,A,-,B,-,A,-,A,A,A,A,B,-,B,B,A,B,B,A,A,A,A,A,B,B,B,A,B,-,A,A,B,A
S16_572480,,-,B,-,B,A,A,-,B,B,-,B,A,A,A,-,A,A,A,B,B,-,A,-,B,-,B,B,A,B,B,A,A,A,B,B,A,B,A,B,B,-,B,A,A,-,A,B,A,A,B,-,A,B,A,A,-,A,B,A,A,B,-,-,B,A,B,A,A,A,A,B,B,-,-,A,B,-,A,B,-,B,B,A,-,-,B,B,-,A,B,B,-,B,B,A,A,B,A,B,-,A,A,B,-,A,B,B,A,A,A,-,-,A,B,B,B,A,A,A,A,B,B,B,A,B,B,B,B,-,A,-,-,A,A,-,B,B,A,B,B,-,A,-,A,A,A,A,B,-,-,B,-,B,B,-,A,A,-,A,B,B,B,A,B,-,A,A,B,A
S16_577517,,-,B,-,B,A,A,A,B,B,B,B,A,A,A,B,A,A,A,B,B,-,A,B,B,A,B,B,A,B,B,A,A,A,B,B,A,B,A,B,B,A,B,A,A,B,A,B,A,A,B,B,A,B,A,A,-,A,B,A,A,B,B,B,B,A,-,A,A,A,A,B,B,A,-,A,B,A,A,B,-,B,B,A,A,B,B,B,B,A,B,B,A,-,B,A,A,B,A,B,A,A,A,B,B,A,B,B,A,A,A,B,-,A,B,B,B,A,A,A,A,B,B,B,A,B,B,B,B,A,A,A,B,A,A,A,B,B,A,B,B,-,A,-,A,A,A,A,B,-,B,B,A,B,B,A,A,A,A,A,B,B,B,A,B,-,A,A,B,A
S16_581967,,-,B,-,B,A,A,A,B,B,B,B,A,A,A,B,A,A,A,B,B,-,A,-,B,A,B,B,A,B,B,A,A,A,B,B,A,B,A,B,B,A,B,A,A,B,A,B,A,A,B,B,A,B,A,A,A,A,B,A,A,B,B,-,B,A,-,A,A,A,A,B,B,A,-,A,B,A,A,B,-,B,B,A,A,B,B,B,B,A,B,B,A,-,B,A,A,B,A,B,A,A,A,B,B,A,B,B,A,A,A,B,-,A,B,B,B,A,A,A,A,B,B,B,A,B,B,B,B,A,A,A,B,A,A,A,-,B,A,-,B,-,A,-,A,A,A,A,B,-,B,B,A,B,B,A,A,A,A,A,B,B,B,A,B,-,A,A,B,A
S16_656072,,-,B,-,B,A,A,A,B,B,B,-,A,A,A,-,A,A,A,B,B,A,A,-,B,A,B,B,A,-,B,A,A,A,B,B,A,B,A,B,B,A,-,A,A,-,A,B,A,A,B,B,A,B,A,A,A,A,B,A,A,B,A,-,B,A,A,A,A,A,A,B,B,A,-,A,B,A,A,B,B,B,B,A,A,A,B,B,A,A,B,-,A,A,B,A,A,B,A,-,A,A,A,B,B,A,B,B,A,A,A,-,-,A,B,B,B,A,A,A,A,B,B,B,A,B,B,B,B,A,A,A,B,A,A,A,-,B,A,B,B,A,A,-,A,A,A,A,B,-,B,B,A,B,B,A,A,A,A,A,B,B,B,A,B,-,A,A,B,A
S16_710936,,-,B,-,B,A,A,A,B,B,B,B,A,A,A,B,A,A,A,B,B,-,A,B,B,B,B,B,A,B,B,A,A,A,B,B,A,B,A,B,B,A,B,A,A,B,A,B,A,A,B,B,A,B,A,A,-,A,B,A,A,B,A,B,B,A,-,A,A,A,A,B,B,A,-,A,B,A,A,B,-,B,B,A,A,A,B,B,A,A,B,B,A,-,B,A,A,B,A,B,A,A,A,B,B,A,B,B,A,A,A,A,-,A,B,B,B,A,A,A,A,B,B,B,A,B,B,B,B,A,A,A,B,A,A,A,B,B,A,B,B,-,A,-,A,A,A,A,B,-,B,B,A,B,B,A,A,A,A,A,B,B,B,A,B,-,A,A,B,A
S16_734977,,-,B,-,B,A,A,A,B,B,B,B,A,A,A,-,A,A,A,B,B,-,A,-,B,B,B,B,A,B,B,A,A,A,B,B,A,B,A,B,-,A,B,A,A,-,A,B,A,A,-,-,A,B,A,A,A,A,B,A,A,B,A,-,B,A,-,A,A,A,A,B,B,A,-,A,B,A,A,B,-,B,B,A,A,A,B,B,A,A,B,B,A,-,B,A,A,B,A,B,A,A,A,B,B,A,B,B,A,A,A,A,-,A,B,B,B,A,A,A,A,B,B,B,A,B,B,B,B,A,A,A,B,A,A,A,-,B,A,-,B,-,A,-,A,A,A,A,B,-,B,B,A,B,B,B,A,A,A,A,B,B,B,A,B,-,A,A,B,A
S16_771917,,-,B,-,B,A,A,A,B,B,B,B,A,A,A,B,A,A,A,B,B,-,A,A,B,B,B,B,A,B,B,A,A,A,B,B,A,B,A,B,B,B,B,A,A,B,A,B,A,A,B,A,A,B,A,A,-,A,B,A,A,B,A,B,B,A,-,A,A,A,A,B,B,A,B,A,B,B,A,B,B,B,B,A,A,A,B,B,A,A,B,B,B,-,B,A,A,B,A,B,A,A,A,B,A,A,B,B,A,A,A,A,A,A,B,B,B,A,A,A,A,B,B,B,A,B,B,B,B,A,A,B,B,A,A,A,B,B,A,B,B,-,A,-,A,A,A,A,B,-,A,B,A,B,B,B,A,A,A,A,B,B,B,A,B,-,A,A,B,A
S16_839644,,-,B,-,B,A,A,A,B,B,B,B,A,A,A,-,A,A,A,B,B,-,A,A,B,B,B,B,A,B,B,A,A,A,B,B,A,B,A,B,B,B,B,A,A,B,A,B,A,A,B,A,A,B,A,A,-,A,B,A,A,B,A,B,B,A,-,A,A,A,A,B,B,A,B,A,B,B,A,B,B,B,B,A,A,A,B,B,A,A,B,B,B,-,B,A,A,B,A,B,A,A,A,B,A,A,B,B,A,A,A,A,-,A,B,B,B,A,A,A,A,B,B,B,A,B,B,B,B,A,A,B,B,A,A,A,B,B,A,B,B,-,A,-,A,A,A,A,B,-,A,B,A,B,B,B,A,A,A,A,B,B,B,A,B,-,A,A,B,A
S17_129965,,-,B,-,B,-,A,A,B,-,B,B,-,B,B,B,A,B,-,A,B,A,A,-,A,A,B,B,-,B,A,A,-,-,A,A,B,B,-,A,A,A,A,A,A,-,B,B,A,B,B,A,B,B,A,A,B,A,A,B,A,-,A,-,A,B,A,A,A,B,-,B,B,B,-,B,A,B,A,A,-,B,A,A,B,-,A,A,A,A,B,A,-,A,A,A,B,B,B,B,-,A,B,A,B,A,-,B,A,A,A,-,-,B,A,A,A,A,A,B,-,A,A,B,B,B,A,A,A,-,-,A,B,A,B,A,-,A,-,-,-,-,B,-,A,B,B,A,A,-,A,A,A,A,B,A,B,A,A,B,B,A,A,A,A,-,B,B,A,B
S17_161814,,-,B,-,B,B,A,-,B,B,-,B,A,B,B,B,A,B,B,A,B,A,A,B,A,A,B,B,B,B,A,A,B,A,A,A,B,B,A,A,A,A,A,A,A,B,B,B,A,B,B,A,B,B,A,A,B,A,A,B,A,B,A,A,A,B,A,A,A,B,B,-,B,B,-,B,A,B,A,A,A,B,A,A,B,A,A,A,A,A,B,A,-,A,A,A,B,B,B,B,B,A,B,A,B,A,B,B,A,A,A,B,A,B,A,A,A,A,A,B,A,A,A,B,B,B,A,A,A,A,-,A,B,A,B,A,A,A,B,B,A,-,B,-,A,B,B,A,A,-,A,A,A,A,B,A,B,A,A,B,B,A,A,A,A,-,B,B,A,B
S17_242996,,-,B,-,B,B,A,A,B,B,-,B,A,B,B,B,A,B,B,A,B,A,A,-,A,A,B,B,B,B,A,A,B,A,A,A,B,B,A,A,A,A,A,A,A,B,B,B,A,B,B,A,B,B,A,A,B,A,A,B,A,B,A,-,A,B,A,A,A,B,B,-,A,B,-,B,A,B,A,A,-,B,A,A,B,A,A,A,A,A,B,A,-,A,A,A,B,B,B,B,B,A,B,A,B,A,B,B,A,A,A,B,-,B,A,A,A,A,A,B,A,A,A,B,B,B,A,A,A,A,-,A,B,A,B,A,A,A,B,B,A,-,B,-,A,B,B,A,A,-,A,A,A,A,B,A,B,A,A,B,B,A,A,A,-,-,B,B,A,B
S17_249678,,-,B,-,B,B,A,A,B,B,-,B,A,B,B,B,A,B,B,A,B,A,A,B,A,A,B,B,B,B,A,A,B,A,A,A,B,B,A,A,A,A,A,A,A,B,B,B,A,B,B,A,B,B,A,A,B,A,A,B,A,B,A,-,A,B,A,A,A,B,B,-,A,B,-,B,A,B,A,A,-,B,A,A,B,A,A,A,A,A,B,A,-,A,A,A,B,B,B,B,B,A,B,A,B,A,B,B,A,A,A,B,A,B,A,A,A,A,A,B,A,A,A,B,B,B,A,A,A,A,-,A,B,A,B,A,A,A,B,B,A,-,B,-,A,B,B,A,A,-,A,A,A,A,B,A,B,A,A,B,B,A,A,A,-,-,B,B,A,B
S17_273642,,-,B,-,B,B,A,A,B,B,-,B,A,B,B,B,A,B,B,A,B,A,A,-,A,A,B,B,B,B,A,A,B,A,A,A,B,A,A,A,A,A,A,A,A,B,B,B,A,B,B,A,B,B,A,A,B,A,A,B,A,B,A,A,A,B,A,A,A,B,B,-,A,B,B,B,A,B,A,A,A,B,A,A,B,A,A,A,A,A,B,A,-,A,A,A,B,B,B,B,B,A,B,A,B,A,B,B,A,A,A,B,A,B,A,A,A,A,A,B,A,A,A,B,B,B,A,A,A,A,B,A,B,A,B,A,A,A,B,-,A,-,B,-,A,B,B,A,A,-,A,A,A,A,B,A,B,B,A,B,B,A,A,A,-,-,B,B,A,B
S17_376953,,B,B,-,-,B,A,A,B,B,-,B,A,B,B,-,A,A,B,B,B,A,A,-,A,A,B,B,-,B,A,A,B,-,A,A,B,A,A,A,A,A,A,A,A,B,B,B,A,B,B,A,B,A,A,A,B,A,A,B,A,B,A,A,A,A,A,A,A,B,B,-,A,A,-,B,A,B,A,A,-,B,A,A,B,A,A,A,A,B,B,A,-,A,A,A,B,B,B,B,B,A,B,A,B,A,B,B,A,A,A,B,-,A,A,B,A,B,A,B,A,B,A,B,B,B,A,A,A,-,B,A,B,A,B,A,A,A,B,-,A,-,B,-,A,B,A,A,A,-,A,A,-,B,B,A,B,B,A,A,B,A,A,A,A,-,B,B,A,B
S17_397023,,-,B,-,B,B,A,A,B,B,-,B,A,B,B,-,A,A,B,B,B,A,A,-,A,A,B,B,-,B,A,A,B,-,A,A,B,A,A,A,A,A,A,A,A,B,B,B,A,B,B,A,B,A,A,A,B,A,A,B,A,B,A,-,A,A,A,A,A,B,B,-,A,A,-,B,A,B,A,A,-,B,A,A,-,A,A,A,A,B,B,A,-,A,A,A,B,B,B,B,B,A,B,A,B,A,B,B,A,A,A,B,-,A,A,B,A,B,A,B,A,B,A,B,B,B,A,A,A,A,B,A,B,A,B,A,A,A,B,B,A,-,B,-,A,B,A,A,A,-,A,A,A,B,B,A,B,B,-,A,B,A,A,A,A,-,B,B,A,B
S17_419711,,-,A,-,B,A,A,A,B,B,-,B,A,B,B,B,A,A,B,B,B,A,A,-,A,A,B,B,B,B,A,A,B,A,A,A,B,A,A,A,A,A,A,A,A,B,B,B,A,B,B,A,B,A,A,A,B,A,A,B,A,B,A,A,A,A,A,A,A,B,B,-,A,A,-,B,A,B,A,A,-,B,A,A,B,A,A,A,A,B,B,A,-,A,A,A,B,B,B,B,B,A,B,A,B,A,B,B,A,A,B,B,-,A,A,B,A,B,A,B,A,B,A,B,B,B,A,A,A,A,B,A,B,A,B,A,A,A,B,-,A,-,B,-,A,B,A,A,A,-,A,A,A,B,B,A,B,B,A,A,B,A,A,B,A,-,B,B,A,B
S17_433931,,-,A,-,B,A,A,A,B,B,-,B,A,B,B,B,A,A,B,B,B,A,A,B,A,A,B,B,B,B,A,-,B,A,A,A,B,A,A,A,A,A,A,A,A,B,B,B,A,B,B,A,B,A,A,A,B,A,A,B,A,B,A,A,A,A,A,A,A,B,B,-,A,A,A,B,A,B,A,A,B,B,A,A,B,A,A,A,A,B,B,A,-,A,A,A,B,B,B,B,B,A,B,A,B,A,B,B,A,A,B,B,-,A,A,B,A,B,A,B,A,B,A,B,B,B,A,A,A,A,B,A,B,A,B,A,A,A,B,B,A,-,B,-,A,B,A,A,A,-,A,A,A,B,B,A,B,B,A,A,B,A,A,B,A,-,B,B,A,B
S17_450174,,-,A,-,B,A,A,A,B,B,-,B,A,B,B,B,A,A,B,B,B,A,A,-,A,A,B,B,B,B,A,-,B,A,A,A,B,A,A,A,A,A,A,A,A,B,B,B,A,B,B,A,B,A,A,A,B,A,A,B,A,B,A,A,A,A,A,A,A,B,B,-,A,A,A,B,A,B,A,A,-,B,A,A,B,A,A,A,A,B,B,A,-,A,A,A,B,B,B,B,B,A,B,A,B,A,B,B,A,A,B,B,-,A,A,B,A,B,A,B,A,B,A,B,B,B,A,A,A,A,B,A,B,A,B,B,A,A,B,B,A,-,B,-,A,B,A,A,A,-,A,A,A,B,B,A,B,B,A,A,B,A,A,B,A,-,B,B,A,B
S17_509088,,-,A,-,B,A,A,A,B,B,-,B,A,B,B,-,A,A,B,B,B,A,A,-,A,A,B,B,B,B,A,A,-,A,A,A,B,A,A,A,A,A,A,A,B,-,B,B,A,B,B,A,B,A,A,A,B,A,A,B,A,-,A,-,A,-,-,A,A,B,B,-,-,A,-,B,A,B,A,A,-,B,A,A,B,-,-,A,A,B,B,A,-,A,A,A,B,B,B,B,B,A,B,A,B,A,B,B,A,A,A,B,-,A,A,B,A,B,A,A,A,B,A,B,B,B,A,A,A,-,B,A,B,A,-,B,-,A,B,-,A,B,B,-,-,B,A,A,A,-,A,A,A,B,B,A,B,B,B,A,B,A,-,B,A,-,B,B,A,B
S17_564781,,-,A,-,B,A,A,A,B,B,-,B,A,B,-,B,A,A,-,-,-,A,A,-,A,B,B,B,-,B,A,A,B,A,A,A,B,A,-,A,A,A,A,A,B,B,B,B,A,B,B,A,B,A,A,A,B,A,A,B,A,B,A,-,A,A,A,A,A,B,B,-,A,A,-,B,A,B,A,A,-,B,A,A,B,A,-,A,A,B,B,A,A,A,A,A,B,-,-,B,B,A,B,A,B,A,-,B,A,A,A,B,-,A,A,B,A,B,A,A,A,B,A,B,B,B,A,A,B,-,B,A,B,A,B,B,B,A,B,-,A,-,B,-,A,B,A,A,A,-,A,A,A,-,B,A,B,B,-,A,B,A,A,B,A,B,B,B,A,B
S17_625231,,-,A,-,B,A,A,A,B,B,B,B,A,B,B,B,A,A,B,B,B,B,A,-,A,B,B,B,B,B,A,-,B,A,A,A,B,A,A,A,A,A,A,A,B,B,B,B,A,B,B,A,B,A,A,A,B,A,A,B,A,B,A,A,A,A,A,A,A,B,B,A,A,A,A,B,A,B,A,A,-,B,A,A,B,A,A,A,A,B,B,A,B,A,A,A,B,B,B,B,B,A,B,A,B,A,B,B,A,A,A,B,-,A,A,B,A,B,A,A,A,B,A,B,B,B,A,A,B,A,B,A,B,A,B,B,B,A,B,B,A,B,B,-,A,B,A,A,A,-,A,A,A,B,B,A,B,B,-,A,B,A,A,B,A,-,B,B,A,B
S17_655012,,B,A,-,B,A,A,A,B,B,B,B,-,B,B,B,A,A,B,B,B,B,A,-,A,B,-,B,B,B,A,-,B,A,A,A,-,A,A,A,A,A,A,-,B,-,B,B,A,B,B,A,B,A,A,A,B,A,A,B,-,B,A,-,A,A,A,B,A,B,B,A,-,A,-,B,A,B,A,A,-,B,A,A,B,A,A,-,A,B,B,-,B,-,A,B,B,B,B,B,B,A,B,A,B,A,B,B,A,-,A,B,-,A,A,B,-,B,A,A,A,B,A,B,B,B,A,A,B,A,B,A,-,A,B,B,B,A,B,-,A,-,B,-,A,B,A,A,A,-,A,A,A,B,B,A,B,B,B,A,B,-,A,B,A,-,B,-,A,B
S17_686011,,-,A,-,B,A,A,A,B,B,B,B,A,B,B,B,A,A,B,B,B,B,A,B,A,B,B,A,B,B,A,-,B,A,A,A,B,A,A,A,A,A,A,A,B,B,B,B,A,B,B,A,B,A,A,A,B,A,A,B,A,B,A,-,A,A,A,B,A,B,B,A,A,A,-,B,A,B,A,A,A,B,A,A,B,A,A,A,A,B,B,A,B,A,A,B,B,B,B,B,B,A,B,A,B,A,B,B,A,A,A,B,A,A,A,B,A,B,A,A,A,B,A,B,B,B,A,A,B,A,B,A,-,A,B,B,B,A,B,-,A,-,B,-,A,B,A,A,A,-,A,A,A,B,B,A,B,-,-,A,B,A,A,B,A,-,B,B,A,B
S17_691746,,-,A,-,B,A,A,A,B,B,B,B,A,B,B,B,A,A,B,B,B,B,A,B,A,B,B,B,B,B,A,-,B,A,A,A,B,A,A,A,A,A,A,A,B,B,B,B,A,B,B,A,B,A,A,A,B,A,A,B,A,B,A,-,A,A,A,B,A,B,B,A,A,A,A,B,A,B,A,A,A,B,A,A,B,A,A,A,A,B,B,A,B,A,A,B,B,B,B,B,B,A,B,A,B,A,B,B,A,A,A,B,-,A,A,B,A,B,A,A,A,B,A,B,B,B,A,A,B,A,B,A,-,A,B,B,B,A,B,B,A,-,B,-,A,B,A,A,A,-,A,A,A,B,B,A,B,-,-,A,B,A,A,B,A,-,B,B,A,B
S17_714897,,-,A,-,B,-,A,A,B,B,B,B,A,B,B,-,A,A,B,B,B,B,A,-,A,B,B,B,-,B,A,-,B,A,A,A,B,A,A,A,A,A,A,A,B,B,B,B,A,B,B,A,B,A,A,A,B,A,A,B,A,B,A,A,A,A,A,B,A,B,B,A,A,A,-,B,A,B,A,A,-,B,A,A,B,A,A,A,A,B,B,A,B,A,A,B,B,B,B,B,B,A,B,A,B,A,B,B,A,A,A,-,-,A,A,B,A,B,A,A,A,B,A,B,B,B,A,A,B,A,B,A,-,A,B,B,-,A,B,-,A,-,B,-,A,B,A,A,A,-,A,A,A,B,B,A,B,-,-,A,B,A,A,B,A,-,B,B,A,B
S17_717662,,-,-,-,B,-,A,A,B,-,B,B,A,B,B,B,A,A,B,B,-,B,A,-,A,B,B,B,-,B,A,-,B,A,A,A,B,-,-,A,A,A,A,A,B,-,B,B,A,B,B,A,B,A,A,A,B,A,A,B,A,B,A,-,A,A,-,-,A,B,-,A,A,A,A,B,A,B,A,A,-,B,A,A,B,A,A,A,A,B,B,A,B,A,A,B,B,B,B,B,-,-,B,A,B,A,-,B,A,A,A,B,-,A,A,B,A,B,A,A,A,B,A,B,B,B,A,A,B,A,B,A,-,A,B,B,B,A,B,-,A,-,B,-,A,B,A,A,-,-,A,A,-,B,B,A,B,-,-,A,B,A,A,B,-,-,B,-,A,-
S17_852424,,-,A,-,B,B,A,A,B,B,B,B,A,B,B,A,A,A,B,B,B,B,A,-,A,B,B,B,-,B,A,A,B,A,A,A,B,A,A,A,A,A,A,A,B,-,-,B,A,B,B,A,B,A,A,A,B,A,A,B,A,B,A,-,A,A,A,B,A,B,B,A,A,A,-,B,A,B,A,A,-,B,A,A,-,A,A,A,A,B,B,-,A,A,A,B,B,B,B,B,B,A,B,-,B,A,B,B,A,A,A,B,-,A,A,B,A,B,A,A,-,B,A,B,B,B,A,A,B,-,B,A,-,A,B,A,B,A,B,-,A,B,B,-,A,B,A,A,A,-,A,A,B,B,B,A,B,-,-,A,B,A,B,B,A,-,B,B,A,B
S18_87814,,-,A,-,-,-,A,-,A,A,A,B,A,A,A,B,B,B,B,A,B,B,B,-,B,A,A,A,-,B,-,-,A,-,A,B,A,A,-,B,A,B,A,B,A,-,A,B,A,B,A,A,A,A,A,B,A,B,A,-,B,-,-,A,B,A,A,A,A,A,A,A,A,A,A,A,A,B,A,A,-,B,-,B,A,B,B,-,B,-,A,-,A,A,A,A,A,-,A,A,B,A,B,B,B,B,A,B,A,A,B,B,-,A,B,A,A,B,-,B,A,A,-,A,A,B,A,A,A,B,A,B,A,A,B,A,B,B,B,-,A,A,A,-,B,A,B,B,-,-,A,A,-,B,A,B,B,B,B,A,A,B,-,B,A,-,B,A,B,-
S18_88953,,-,A,-,A,A,A,A,A,A,-,B,-,A,A,B,B,-,B,A,B,B,B,-,B,A,A,A,-,B,A,B,A,A,A,-,A,A,-,-,A,B,A,B,A,-,A,B,A,B,A,-,A,A,A,B,A,B,A,B,B,A,A,-,B,-,-,A,A,A,A,A,A,A,-,A,A,B,A,A,-,B,A,B,A,B,B,-,-,B,A,A,A,A,A,A,A,B,A,A,-,A,B,-,B,B,A,B,A,A,B,B,-,-,B,A,A,B,A,B,A,A,A,A,A,B,A,A,A,-,A,-,A,-,B,A,-,B,B,-,A,A,A,-,-,-,B,B,B,-,A,A,B,B,A,B,B,B,B,A,A,B,B,B,A,-,-,A,B,A
S18_227632,,-,B,-,A,A,A,A,A,A,A,B,-,A,A,B,B,B,B,A,B,B,B,A,B,A,A,A,A,B,A,B,A,A,A,B,A,A,A,-,A,B,A,B,A,A,A,B,B,B,A,A,A,A,A,B,A,-,A,B,B,A,-,A,B,A,A,A,A,A,B,A,A,A,A,A,A,B,A,A,A,B,A,B,A,B,B,A,B,B,A,A,A,A,A,A,A,B,B,A,B,A,B,-,B,B,A,B,A,A,B,B,-,A,B,A,A,B,A,A,A,A,A,A,A,B,A,A,A,B,A,B,A,B,B,A,B,B,B,B,A,A,A,-,B,A,B,B,B,-,A,A,B,A,A,B,B,B,B,A,-,B,B,B,A,-,B,A,B,A
S18_233491,,-,B,B,A,A,A,A,A,A,A,B,-,A,A,B,B,B,B,A,B,B,B,A,B,A,A,A,A,B,A,B,A,A,A,B,A,A,A,-,A,B,A,B,A,A,A,B,B,B,A,A,A,A,A,B,A,-,A,B,B,A,-,A,B,A,A,A,A,A,B,A,A,A,-,A,A,B,A,A,A,B,A,B,A,B,B,A,B,B,A,A,A,A,A,A,A,B,B,A,B,A,B,-,B,B,A,B,A,A,B,B,A,A,B,A,A,B,A,A,A,A,A,A,A,B,A,A,A,B,A,B,A,B,B,A,B,B,B,B,A,A,A,-,B,A,B,B,B,-,A,A,B,A,A,B,B,B,B,A,-,B,B,B,A,-,B,A,B,A
S18_253627,,-,B,-,A,A,A,A,A,A,A,B,A,A,A,-,B,B,-,A,B,B,B,A,B,A,A,A,A,B,A,B,A,-,A,B,A,A,-,-,A,B,A,B,A,-,-,B,B,B,-,A,A,A,A,B,A,-,A,B,B,A,-,-,B,A,-,A,A,A,B,A,A,A,-,A,A,B,A,A,-,B,A,B,A,B,B,-,B,B,A,A,A,A,A,A,A,B,B,A,B,A,B,B,B,B,A,B,A,-,B,B,-,A,B,A,-,B,A,A,A,A,A,A,A,B,A,A,A,-,A,B,A,B,B,A,B,B,-,-,A,A,A,-,B,A,B,B,B,-,A,A,-,A,A,B,-,B,-,A,B,B,B,B,A,-,B,A,B,A
S18_255417,,-,B,-,-,A,A,A,A,A,A,B,-,A,A,-,B,B,B,A,B,B,B,A,B,A,A,A,-,B,A,B,A,A,A,B,A,A,-,-,A,B,A,B,A,-,A,-,B,B,A,A,A,A,A,B,A,B,A,B,B,A,-,-,B,A,-,A,A,A,B,A,A,A,-,A,A,B,A,A,-,B,A,B,A,B,B,A,B,B,A,-,A,A,A,A,A,B,B,A,B,-,B,B,B,B,A,B,A,A,B,B,-,A,B,A,A,B,A,A,A,A,A,A,A,-,A,A,A,-,A,B,A,-,B,A,-,B,-,-,A,A,-,-,B,A,B,B,B,-,A,A,-,A,A,B,B,B,B,A,A,B,B,B,A,-,B,A,B,A
S18_278811,,-,B,-,A,A,A,A,A,A,A,B,-,A,A,B,B,B,B,A,B,B,B,A,B,A,A,A,A,B,A,B,A,A,B,B,A,A,A,-,A,B,A,B,A,A,A,B,B,B,A,A,A,A,A,B,A,-,A,B,B,A,-,A,B,A,A,A,A,A,B,A,A,A,A,A,A,B,A,A,A,B,A,B,A,B,B,A,B,A,A,A,A,A,A,A,A,B,B,A,B,A,B,-,B,B,A,B,A,A,B,B,-,A,B,A,A,B,A,A,A,A,A,A,A,B,A,A,A,B,A,B,A,B,B,A,-,B,B,B,A,A,A,B,B,A,B,B,B,-,A,A,B,A,A,B,B,B,B,A,-,B,B,B,A,-,B,A,B,A
S18_280642,,A,B,-,A,A,A,A,A,A,A,B,-,A,A,-,B,B,B,A,B,B,B,-,B,A,A,A,A,B,A,B,A,-,B,B,A,A,A,-,A,B,A,B,A,A,A,B,B,B,A,A,A,A,A,B,A,-,A,B,B,A,-,A,B,A,A,A,A,A,B,A,A,A,-,A,A,B,A,A,A,B,A,B,A,B,B,A,B,A,A,A,A,A,A,A,-,B,B,A,B,A,B,-,B,B,A,B,A,A,B,B,-,A,B,A,A,B,A,A,A,A,A,A,A,B,A,A,A,B,A,B,A,B,B,A,-,B,B,-,A,A,A,-,B,A,B,B,B,-,A,A,B,A,A,B,B,B,B,A,B,B,B,B,A,A,B,A,B,A
S18_446648,,-,B,-,A,A,A,A,A,A,-,B,-,A,A,B,B,B,B,A,B,B,B,-,B,A,A,A,A,A,A,B,A,A,B,A,A,A,A,-,A,B,A,B,A,A,-,A,B,B,A,B,A,A,A,B,A,A,A,B,B,A,B,-,A,A,A,A,A,B,B,A,A,A,-,-,A,B,A,A,-,B,A,B,A,B,B,A,B,A,A,A,A,A,A,A,A,B,B,B,B,A,B,-,B,B,A,B,A,A,B,B,-,A,B,A,A,B,A,B,A,A,A,A,A,B,A,A,A,B,A,B,A,B,B,A,-,B,B,B,A,A,A,-,B,-,B,B,B,-,A,A,B,A,A,B,B,B,A,A,B,B,B,B,A,-,B,-,B,A
S18_475441,,-,B,-,A,A,A,A,A,A,A,B,B,A,A,B,B,B,B,A,B,B,B,A,B,A,A,A,A,A,A,B,A,A,B,A,A,A,A,-,A,B,A,B,A,A,A,A,B,B,A,B,A,A,A,B,A,A,A,B,B,A,-,A,A,A,A,A,A,B,B,A,A,A,A,A,A,B,A,A,-,B,A,B,A,B,B,A,B,A,A,A,A,A,A,A,A,B,B,B,B,A,B,-,B,B,A,B,A,A,B,B,A,A,B,A,A,B,A,B,A,A,A,A,A,B,A,A,A,B,A,B,A,B,B,A,B,B,B,B,A,A,A,-,B,-,B,B,B,-,A,A,B,A,A,B,B,B,A,A,-,B,B,B,A,-,B,A,B,A
S18_481790,,-,B,-,A,A,A,A,A,A,A,B,-,A,A,B,B,B,B,A,B,B,B,A,B,A,A,A,A,A,A,B,A,A,B,A,A,A,A,-,A,B,A,B,A,A,A,A,B,B,A,B,A,A,A,B,A,A,A,B,B,A,-,A,A,A,A,A,A,B,B,A,A,A,A,A,A,B,A,A,A,B,A,B,A,B,B,A,B,A,A,A,A,A,A,A,A,B,B,B,B,A,B,-,B,B,A,B,A,A,B,B,A,A,B,A,A,B,A,B,A,A,A,A,A,B,A,A,A,B,A,B,A,B,B,A,B,B,B,B,A,A,A,-,B,-,B,B,B,B,A,A,B,A,A,B,B,B,A,A,-,B,B,B,A,-,B,A,B,A
S18_489999,,-,B,-,A,A,A,A,A,A,-,B,A,A,A,-,B,B,B,A,B,B,B,-,B,A,A,A,A,A,A,B,A,A,B,A,A,A,A,-,A,B,A,B,A,A,A,A,B,B,A,B,A,A,A,B,A,A,A,B,B,A,-,-,A,A,A,A,A,B,B,A,A,A,-,A,A,B,A,A,-,B,A,B,A,B,B,A,B,A,A,A,A,A,A,A,A,B,B,B,B,A,B,-,B,B,A,B,A,A,B,B,-,A,B,A,A,B,A,B,A,A,A,A,A,B,A,A,A,B,A,B,A,B,B,A,B,B,B,-,A,A,A,-,B,-,B,B,B,-,A,A,B,A,A,B,B,B,A,A,-,B,B,B,A,-,B,-,B,-
S18_500045,,-,B,-,A,A,A,A,A,A,A,B,B,A,A,B,B,B,B,A,B,B,B,-,B,A,A,A,A,A,A,B,A,-,B,A,A,A,A,-,A,B,A,B,A,A,A,A,B,B,A,B,A,A,A,B,A,A,A,B,B,A,-,-,A,A,A,A,A,B,B,A,A,A,-,A,A,B,A,A,-,B,A,B,A,B,B,A,B,A,A,A,A,A,A,A,A,B,B,B,B,A,B,-,B,B,A,B,A,A,B,B,-,A,B,A,A,B,A,B,A,A,A,A,A,B,A,A,A,-,A,B,A,B,B,A,-,B,B,B,A,A,A,-,B,B,B,B,B,-,A,A,-,A,A,B,B,B,-,A,-,B,B,B,A,-,B,A,B,A
S18_501089,,-,B,-,A,A,A,A,A,A,A,B,-,A,A,B,B,B,B,A,B,B,B,A,B,A,A,A,A,A,A,B,A,A,B,A,A,A,A,-,A,B,A,B,A,A,A,A,B,B,A,B,A,A,A,B,A,A,A,B,B,A,-,A,A,A,A,A,A,B,B,A,A,A,-,A,A,B,A,A,-,B,A,B,A,B,B,A,B,A,A,A,A,A,A,A,A,B,B,B,B,A,B,-,B,B,A,B,A,A,B,B,A,A,B,A,A,B,A,B,A,A,A,A,A,B,A,A,A,B,A,B,A,B,B,A,B,B,B,-,A,A,A,-,B,-,B,B,B,B,A,A,-,A,A,B,B,B,A,A,B,B,B,B,A,A,B,A,B,A
S18_521094,,-,B,-,A,-,A,-,A,A,A,B,A,A,A,B,B,B,B,A,B,B,B,-,B,B,A,A,A,A,A,B,-,-,B,A,A,A,-,-,A,B,A,-,A,-,A,A,B,B,A,B,A,A,A,B,A,A,A,B,B,A,-,-,A,A,A,A,A,B,B,A,A,A,-,A,A,B,A,A,-,B,A,B,A,B,B,-,B,A,A,-,A,A,A,A,A,B,B,B,B,A,B,-,B,B,-,B,A,-,B,B,-,A,B,A,A,B,A,B,A,A,A,A,A,B,A,A,A,B,A,B,A,B,B,A,-,B,-,-,A,A,A,-,B,A,B,B,B,-,A,A,B,A,A,B,B,B,A,A,B,B,B,B,A,-,B,A,B,A
S18_590934,,-,B,-,A,B,A,A,A,A,A,B,A,A,A,B,B,A,B,A,B,B,B,A,B,B,A,A,A,A,A,B,A,A,B,A,A,A,A,-,A,B,A,B,A,A,A,A,B,B,A,B,A,A,A,B,A,A,A,B,B,A,A,A,A,A,A,A,A,B,B,A,A,A,-,A,A,B,A,A,-,B,A,B,A,B,B,A,B,A,A,B,A,A,A,A,A,B,B,B,B,A,B,-,B,B,A,B,A,A,B,B,A,A,B,A,A,-,A,B,B,A,A,A,A,B,A,A,A,B,A,B,A,B,B,A,B,B,B,B,A,A,A,-,A,-,B,B,B,B,A,B,B,A,A,B,B,B,A,A,-,B,B,B,A,-,B,A,B,A
S18_636503,,-,B,-,A,B,A,A,A,A,A,B,-,A,A,B,B,A,B,A,B,B,B,-,B,B,A,A,A,A,A,B,A,A,B,A,A,A,A,-,A,B,A,B,A,A,A,A,B,B,A,B,A,A,A,B,A,A,A,B,B,A,-,A,A,A,A,A,A,B,B,A,A,A,-,A,A,B,A,A,A,B,A,B,A,B,B,A,B,A,A,B,A,A,A,A,A,B,B,B,B,A,B,-,B,B,A,B,A,A,B,B,-,A,B,A,A,B,A,B,B,A,A,A,A,B,A,A,A,B,A,B,A,B,B,A,B,B,B,B,A,A,A,-,A,-,B,B,B,-,A,B,B,A,A,B,B,B,A,A,B,B,B,B,A,-,B,A,B,A
S18_638417,,-,B,-,A,B,A,A,A,A,A,B,A,A,A,B,B,A,B,A,B,B,B,-,B,B,A,A,-,A,A,B,A,A,B,A,A,A,-,-,A,B,A,B,A,A,A,A,B,B,A,-,A,A,A,B,A,A,A,B,B,A,-,-,A,A,A,A,A,B,B,A,A,A,-,A,A,B,A,A,-,B,A,B,A,B,B,A,B,A,A,B,A,A,A,A,A,B,B,B,B,A,B,-,B,B,A,B,A,-,B,B,-,A,B,A,A,B,A,B,B,A,A,A,A,B,A,A,A,B,A,B,A,B,B,A,-,B,B,-,A,A,A,-,A,-,B,B,B,-,A,B,B,A,A,B,B,B,A,A,-,B,B,B,A,-,B,A,B,A
S18_644913,,-,B,-,A,B,A,A,A,A,A,B,-,A,A,B,B,A,B,A,B,B,B,-,B,B,A,A,A,A,A,B,A,A,B,A,A,A,A,-,A,B,A,B,A,A,A,A,B,B,A,A,A,A,A,B,A,A,A,B,B,A,-,-,A,A,A,A,A,B,B,A,A,A,-,A,A,B,A,A,-,B,A,B,A,B,B,A,B,A,A,B,A,A,A,A,A,B,B,B,B,A,B,-,B,B,A,B,A,A,B,B,-,A,B,A,A,B,A,B,B,A,A,A,A,B,A,A,A,B,A,B,A,B,B,A,B,B,B,-,A,A,A,-,-,-,B,B,B,B,A,B,B,A,A,B,B,B,A,A,B,B,B,B,A,-,B,A,B,A
S18_672179,,-,B,-,A,B,A,A,A,A,A,B,-,A,A,B,B,A,B,A,B,B,B,-,B,B,A,A,A,A,A,B,A,A,B,A,A,A,A,-,A,B,A,B,A,A,A,A,B,B,A,A,A,A,B,B,A,A,A,B,B,A,-,A,A,A,A,A,A,B,B,A,A,A,A,A,A,B,A,A,-,B,A,B,A,B,B,A,B,A,A,B,A,A,A,A,A,B,B,B,B,A,B,-,B,B,A,B,A,A,B,B,-,A,B,A,A,B,A,B,B,A,A,A,A,B,A,A,A,B,A,B,A,B,B,A,B,B,B,B,A,A,A,-,A,-,B,B,B,-,A,B,B,A,A,B,B,B,A,A,-,B,B,B,A,-,B,A,B,A
S18_677413,,-,B,-,A,B,A,A,A,A,A,B,-,A,A,B,B,A,B,A,B,B,B,A,B,B,A,A,A,A,A,B,A,A,B,A,A,A,A,-,A,B,A,B,A,A,A,A,B,B,A,A,A,A,B,B,A,A,A,B,B,A,-,A,A,A,A,A,A,B,B,A,A,A,A,A,A,B,A,A,A,B,A,B,A,B,B,A,B,A,A,B,A,A,A,-,A,B,B,B,B,A,B,-,B,B,A,B,A,A,B,B,-,A,B,A,A,B,A,B,B,A,A,A,A,B,A,A,A,B,A,B,B,B,B,A,B,B,B,B,A,A,A,-,A,-,B,B,B,-,A,B,B,A,A,B,B,B,A,A,B,B,B,B,A,-,B,A,B,A
S18_695864,,-,B,-,A,B,A,A,A,A,A,B,-,A,A,B,B,A,B,A,B,B,B,A,B,B,A,A,A,A,A,B,A,A,B,A,A,A,A,-,A,B,A,B,A,A,A,A,B,B,A,A,A,A,B,B,A,A,A,B,B,A,-,A,A,A,A,A,A,B,B,A,A,A,A,A,A,B,A,A,-,B,A,B,A,B,B,A,B,A,A,B,A,A,A,-,A,B,B,B,B,A,B,-,B,B,A,B,A,A,B,B,B,A,B,A,A,B,A,B,B,A,A,A,A,B,A,A,A,B,A,B,B,B,B,A,B,B,B,-,A,A,A,-,A,-,B,B,B,-,A,B,B,A,A,B,B,B,A,A,-,B,B,B,A,A,B,A,B,A
S18_717422,,-,B,-,A,B,A,A,A,A,A,B,-,A,A,B,B,A,B,A,B,B,B,A,B,B,A,A,A,A,A,B,A,A,B,A,A,A,A,-,A,B,A,B,A,A,A,A,B,B,A,A,A,A,B,B,A,A,A,B,B,A,-,A,A,A,A,A,A,B,B,A,A,A,-,A,A,B,A,A,A,B,A,B,A,B,B,A,B,A,A,B,A,A,A,-,A,B,B,B,B,A,B,-,B,B,A,B,A,A,A,B,-,A,B,A,A,B,A,B,B,A,A,A,A,B,A,A,A,B,A,B,B,B,B,A,B,B,B,B,A,A,A,-,A,-,B,B,B,-,A,B,B,A,A,B,B,B,A,A,-,B,B,B,A,-,B,A,B,A
S18_722743,,-,B,-,A,B,A,A,A,A,A,B,-,A,A,B,B,A,B,A,B,B,B,A,B,B,A,A,A,A,A,B,A,A,B,A,A,A,-,-,A,B,A,B,A,A,A,A,B,B,A,A,A,A,B,B,A,A,A,B,B,A,-,A,A,A,A,A,A,B,B,A,A,A,A,A,A,B,A,A,-,B,A,B,A,B,B,A,B,A,A,B,A,A,A,-,A,B,B,B,B,A,B,-,B,B,A,B,A,A,A,B,B,A,B,A,A,B,A,B,B,A,A,A,A,B,A,A,A,B,A,B,B,B,B,A,B,B,B,B,A,A,A,-,A,-,A,B,B,-,A,B,B,A,A,B,B,B,A,A,-,B,B,B,A,-,B,A,B,A
S18_724318,,-,B,-,A,B,A,A,A,A,A,B,-,A,A,B,B,A,B,A,B,B,B,A,B,B,A,A,-,A,A,B,A,A,B,A,A,A,A,-,A,B,A,B,A,A,A,A,B,B,A,A,A,A,B,B,A,A,A,B,B,A,-,-,A,A,A,A,A,B,B,A,A,A,-,A,A,B,A,A,-,B,A,B,A,B,B,A,B,A,A,B,A,A,A,-,A,B,B,B,B,A,B,-,B,B,A,B,A,A,A,B,-,A,B,A,A,B,A,B,B,A,A,A,A,B,A,A,A,B,A,B,B,B,B,A,B,B,B,-,A,A,A,-,A,-,A,B,B,-,A,B,B,A,A,B,B,B,A,A,B,B,B,B,A,-,B,A,B,A
S18_732609,,-,B,-,A,B,A,A,A,A,A,B,B,A,A,B,B,A,B,A,B,B,B,-,B,B,A,A,A,A,A,-,A,A,B,A,A,A,A,A,A,B,A,B,A,A,A,A,B,B,A,A,A,A,-,B,A,A,A,B,B,A,A,-,A,A,A,A,A,B,B,A,A,A,-,A,A,B,A,A,-,B,A,B,A,B,B,A,-,A,A,B,A,A,A,-,A,B,B,B,B,A,B,-,B,B,A,-,A,A,A,B,-,A,B,A,A,B,A,B,B,A,A,A,A,B,A,A,A,B,A,B,B,B,B,A,-,B,B,B,A,A,A,-,A,A,A,B,B,-,A,B,-,A,A,B,-,B,A,A,B,B,B,B,A,-,B,A,B,A
S18_766457,,-,B,-,A,-,A,A,A,A,A,B,-,A,A,-,B,A,B,A,B,-,B,-,B,B,A,A,A,A,A,B,A,A,B,A,A,A,A,A,A,B,A,-,A,A,A,A,B,-,A,A,A,A,-,-,A,A,A,B,B,A,A,A,A,A,A,A,A,B,B,A,A,A,A,A,A,B,A,A,-,-,A,B,A,-,B,A,B,A,A,B,A,A,A,A,A,-,B,B,B,B,B,A,B,B,A,-,A,A,A,B,-,A,B,A,A,B,A,-,-,A,A,A,A,B,A,A,A,-,A,-,B,B,-,A,-,B,B,A,A,A,A,-,A,A,A,B,B,-,A,-,-,A,A,B,B,B,A,A,-,B,B,B,A,-,-,A,B,A
S18_870962,,-,B,-,A,-,A,-,A,A,A,B,B,A,A,B,B,A,B,A,-,B,A,-,B,B,A,A,A,A,A,B,-,-,B,A,A,A,-,-,A,B,A,B,B,-,A,-,B,B,A,A,-,A,B,A,A,A,B,B,B,-,A,A,A,A,A,A,A,B,B,A,A,A,A,A,A,B,A,A,-,B,A,B,A,B,B,A,B,A,A,-,A,A,A,-,A,B,B,B,-,B,B,-,B,B,-,B,A,A,A,-,-,A,B,-,A,B,A,-,B,A,A,A,A,B,A,A,A,-,A,B,B,B,B,-,-,B,B,-,A,A,A,A,A,-,A,B,B,-,A,B,B,A,A,B,B,B,-,A,A,B,B,B,A,-,B,A,B,A
S18_882796,,-,B,-,A,B,A,A,A,A,A,B,-,A,A,B,B,A,B,A,B,B,A,-,B,B,A,A,A,A,A,B,A,A,B,A,A,A,A,-,A,B,A,B,B,A,A,A,B,B,A,A,A,A,B,A,A,A,B,B,B,A,A,-,A,A,A,-,A,B,B,A,A,A,-,A,A,B,A,A,-,B,A,B,A,B,B,A,B,A,A,B,A,A,A,-,A,B,B,B,B,B,B,-,B,B,A,B,A,A,A,B,-,A,B,A,A,B,A,B,B,A,A,A,A,B,A,A,A,B,A,B,B,B,B,A,-,B,B,-,A,A,A,-,A,B,A,B,B,-,A,B,B,A,A,B,B,B,A,A,A,B,B,B,A,-,B,A,B,A
S18_893397,,-,B,-,A,B,A,A,A,A,A,B,-,A,A,B,B,A,B,A,B,B,A,A,B,B,A,A,A,A,A,B,A,A,B,A,A,A,A,-,A,B,A,B,B,A,A,A,B,B,A,A,A,A,B,A,A,A,B,B,B,A,A,-,A,A,A,-,A,B,B,A,A,A,A,-,A,B,A,A,-,B,A,B,A,B,B,A,B,A,A,B,A,A,A,-,A,B,B,B,B,B,B,-,B,B,A,B,A,A,A,B,-,A,B,A,A,B,A,B,B,A,A,A,A,B,A,A,A,B,A,B,B,B,B,A,B,B,B,-,A,A,A,-,A,B,A,B,B,-,A,B,B,A,A,B,B,B,A,A,A,B,B,B,A,-,B,A,B,-
S18_921101,,-,B,-,A,B,A,A,A,A,A,B,-,A,A,B,B,A,B,B,B,B,A,A,B,B,A,A,A,A,A,B,A,A,B,A,A,A,A,-,A,B,A,B,B,A,A,A,B,B,A,-,A,A,B,A,A,-,B,B,B,A,A,-,A,A,A,-,A,B,B,A,A,A,A,A,A,B,A,A,A,B,A,B,A,B,B,A,B,A,A,B,A,A,A,-,A,B,B,B,B,B,B,-,B,B,A,B,A,A,A,B,-,A,B,A,A,B,A,B,B,A,A,A,A,B,A,A,A,B,A,B,B,B,B,A,B,B,B,B,A,A,A,-,A,B,A,B,B,-,A,B,B,A,A,B,B,B,A,A,A,B,B,B,A,-,B,A,B,A
S18_940122,,-,B,-,A,B,A,A,A,A,A,B,-,A,A,B,B,A,B,B,B,B,A,-,B,B,A,A,A,A,A,B,A,-,B,A,A,A,A,-,A,B,A,B,B,A,A,A,B,B,A,-,A,A,B,A,A,-,B,B,B,A,A,-,A,A,A,-,A,B,B,A,A,A,-,A,A,B,A,A,-,B,A,B,A,B,B,A,B,A,A,B,A,A,A,A,A,B,B,B,B,B,B,A,B,B,A,B,A,A,A,B,-,A,B,A,A,B,A,B,B,A,A,A,A,B,A,A,A,A,A,B,B,B,B,A,-,B,B,-,A,A,A,-,A,B,A,B,B,-,A,B,-,A,A,B,B,B,A,A,A,B,B,B,A,-,B,A,B,A
S18_1005562,,-,B,-,A,B,A,-,A,A,A,B,A,A,A,-,B,A,B,B,B,B,A,A,B,B,-,A,A,A,A,B,A,A,B,A,A,A,A,-,A,-,A,A,B,A,A,A,B,B,A,-,A,A,B,A,A,A,B,B,B,-,A,A,A,B,-,B,A,B,B,A,A,A,-,-,A,B,A,A,-,B,A,B,A,B,B,A,B,A,A,B,A,A,A,B,A,B,B,B,-,B,B,A,B,B,A,B,A,A,A,B,-,A,B,A,A,B,A,B,B,A,A,A,A,A,A,A,A,A,A,B,B,B,A,A,-,B,-,-,A,A,A,-,A,B,A,B,B,-,A,B,B,A,A,B,B,B,A,A,A,B,B,B,A,-,B,A,B,A
S18_1025552,,-,B,-,A,B,A,A,A,A,A,B,-,A,A,-,B,A,B,B,B,B,A,-,B,B,A,A,A,A,A,B,A,A,B,A,A,A,A,-,A,-,A,A,B,A,A,A,B,B,A,-,A,A,B,A,A,A,B,B,B,A,A,-,A,B,-,B,A,B,B,A,A,A,-,A,A,B,A,A,-,B,A,B,A,B,B,A,B,A,A,B,A,A,A,B,A,B,B,B,B,B,B,-,B,B,A,B,A,A,A,B,B,A,B,A,A,B,A,B,B,A,A,A,A,A,A,A,A,A,A,B,B,B,A,A,-,B,B,-,A,A,A,-,A,B,A,B,B,-,A,B,B,A,A,B,B,B,A,A,A,B,B,B,A,-,B,A,B,A
S18_1040120,,-,B,-,A,B,A,A,A,A,A,B,-,A,A,B,B,A,B,B,B,B,A,A,B,B,A,B,A,A,A,B,A,A,B,A,A,A,A,-,A,-,A,A,B,A,A,A,B,B,A,-,A,A,B,A,A,-,B,B,B,A,A,A,A,B,-,B,A,B,B,A,A,A,A,A,A,B,A,A,-,B,A,B,A,B,B,A,B,A,A,B,A,A,A,B,A,B,B,B,B,B,B,A,B,B,A,B,A,A,A,B,B,A,B,A,A,B,A,B,B,A,A,A,A,A,A,A,A,A,A,B,B,B,A,A,B,B,B,-,A,A,A,-,A,B,A,B,B,B,A,B,B,A,A,B,B,B,A,A,A,B,B,B,A,-,B,A,B,A
S18_1048869,,-,B,-,A,B,A,A,A,A,A,B,-,A,A,B,B,A,B,B,B,B,A,A,B,B,A,B,A,A,A,B,A,A,B,A,A,A,A,-,A,-,A,A,B,A,A,A,B,B,A,-,A,A,B,A,A,-,B,B,B,A,A,A,A,B,A,B,A,B,B,A,A,A,A,A,A,B,A,A,-,B,A,B,A,B,B,A,B,A,A,B,A,A,A,B,A,B,B,B,B,B,B,A,B,B,A,B,A,A,A,B,-,A,B,A,A,B,A,B,B,A,A,A,A,A,A,A,A,A,A,B,B,B,A,A,B,B,B,B,A,A,A,-,A,B,A,B,B,-,A,B,B,A,A,B,B,B,A,A,A,B,B,B,A,-,B,A,B,A
S18_1062534,,-,B,-,A,B,A,A,A,A,A,B,-,A,A,B,B,A,B,B,B,B,A,-,B,B,A,B,A,A,A,B,A,A,B,A,A,A,A,-,A,-,A,A,B,A,A,A,B,B,A,-,A,A,B,A,A,-,B,B,B,A,A,A,A,B,-,B,A,B,B,A,A,A,A,A,A,B,A,A,A,B,A,B,A,B,B,A,B,A,A,B,A,A,A,B,A,B,B,B,B,B,B,A,B,B,A,B,A,A,A,B,B,A,B,A,A,B,A,B,B,A,A,A,A,A,A,A,A,A,A,B,B,B,A,A,B,B,B,B,A,A,A,-,A,B,A,B,B,-,A,B,B,A,A,B,B,B,A,A,A,B,B,B,A,-,B,A,B,A
S18_1066455,,-,B,-,A,B,A,A,A,-,-,B,-,A,A,-,B,A,B,B,B,B,A,-,B,B,A,B,A,A,-,B,A,-,B,A,-,A,A,-,A,B,A,A,B,A,A,A,B,B,A,-,A,A,B,A,A,A,B,B,B,A,A,-,A,B,-,B,A,B,B,A,A,A,-,A,A,B,A,A,-,B,-,B,A,B,B,A,B,A,A,B,A,A,A,B,A,B,B,B,B,B,B,A,B,B,A,B,A,A,A,B,-,A,B,A,A,B,A,B,B,A,A,A,A,A,A,A,A,-,A,B,B,B,A,A,B,B,B,-,A,A,A,-,A,-,A,B,B,-,A,B,-,A,A,B,B,B,-,A,A,B,B,B,A,-,B,A,B,-
S18_1096293,,-,B,-,A,B,A,A,A,A,A,B,-,A,A,B,B,A,B,B,B,B,A,A,B,B,A,B,A,A,A,B,A,A,B,A,A,A,A,-,A,-,A,A,B,A,A,A,B,B,A,B,A,A,B,A,A,-,B,B,B,A,A,A,A,B,-,B,A,B,B,A,A,A,-,A,A,B,A,A,-,B,A,B,A,B,B,A,B,A,A,B,A,A,A,B,A,B,B,B,B,B,B,A,B,B,A,B,A,A,A,B,B,A,B,A,A,B,A,B,B,A,A,A,A,A,A,A,A,A,A,B,B,B,A,A,B,B,B,B,A,A,A,-,A,B,A,B,B,-,A,B,B,A,A,B,B,B,A,A,A,B,B,B,A,A,B,A,B,A
S18_1143246,,-,B,-,A,B,A,A,A,A,A,B,B,A,A,B,B,A,B,B,B,B,A,A,B,B,A,B,A,A,A,B,A,-,B,A,A,A,A,-,A,A,A,A,B,A,A,A,B,B,A,B,A,A,B,A,A,A,B,B,B,A,A,-,A,B,-,B,A,B,B,A,A,A,-,A,A,B,A,A,-,B,A,B,A,B,B,A,B,A,A,B,A,A,A,B,A,B,B,B,B,B,B,A,B,B,B,B,A,A,A,B,-,A,B,A,A,B,A,B,B,A,A,A,A,A,A,A,A,A,A,B,B,B,A,A,-,B,B,-,A,A,A,-,A,B,A,B,B,-,A,B,B,A,A,B,B,B,-,A,A,B,B,B,A,-,B,A,B,A
S18_1182795,,-,B,-,A,B,A,A,A,A,A,B,-,A,B,B,B,A,B,B,B,-,A,-,B,B,A,B,A,A,A,B,A,A,B,A,A,A,A,B,A,A,A,A,B,A,A,A,B,A,A,B,A,A,B,A,A,-,B,B,B,A,A,A,A,B,-,B,A,B,B,A,A,A,A,A,A,B,A,A,A,B,A,B,B,B,B,A,B,A,A,B,A,A,A,B,A,B,B,B,B,B,B,A,B,B,B,B,A,A,A,B,-,A,B,A,A,B,A,B,B,A,A,A,A,A,A,A,A,A,A,B,B,B,A,A,B,B,B,-,A,A,B,-,A,B,A,B,B,-,A,B,B,A,A,B,B,B,A,A,A,B,B,B,A,-,B,A,B,A
S18_1220212,,-,B,-,-,B,A,A,A,A,-,B,-,A,B,B,B,A,B,B,B,-,A,-,B,B,A,B,-,A,A,B,A,A,B,A,-,-,A,B,A,A,A,A,B,A,A,-,-,A,A,B,A,A,B,A,A,-,B,B,B,A,A,-,-,B,A,B,A,B,B,-,A,A,-,A,-,B,A,A,-,B,A,B,B,B,B,A,B,A,A,B,-,A,A,B,A,B,B,B,B,B,B,A,B,B,B,B,A,A,A,B,-,A,B,A,A,-,A,B,B,A,A,A,A,-,-,A,-,-,-,B,B,B,-,A,-,B,B,-,A,A,B,-,A,B,A,B,B,-,-,B,B,A,A,B,-,B,A,B,A,B,B,B,A,-,B,A,B,-
S18_1235954,,-,B,-,A,B,A,A,A,A,A,B,A,A,B,B,B,A,B,B,B,-,A,A,B,B,A,B,A,A,A,B,A,A,B,A,A,A,A,B,A,A,A,A,B,A,A,A,B,A,A,B,A,A,B,A,A,-,B,B,B,A,A,A,A,B,A,B,A,B,B,A,A,A,A,A,A,B,A,A,-,B,A,B,B,B,B,A,B,A,A,B,A,A,A,B,A,B,B,B,B,B,B,A,B,B,B,B,A,A,A,B,-,A,B,A,A,B,A,B,B,A,A,A,A,A,A,A,A,A,A,B,B,B,A,A,B,B,B,B,A,A,B,-,A,-,A,B,B,-,A,B,B,A,A,B,B,B,A,B,A,B,B,B,A,-,B,A,B,A
S18_1281822,,B,B,-,A,B,A,A,A,A,A,B,A,A,B,-,B,A,B,B,B,-,A,-,B,B,A,B,A,A,A,B,A,A,B,A,A,A,A,B,A,A,A,A,B,A,A,A,B,A,A,B,A,A,B,A,A,-,B,B,B,A,A,A,A,B,B,B,A,B,B,A,A,A,-,A,A,B,A,A,-,B,A,B,B,-,B,A,B,A,A,-,A,A,A,B,A,B,B,B,B,B,B,A,B,B,B,B,A,A,A,B,-,A,B,A,A,B,A,B,B,A,A,A,A,A,A,A,A,A,A,B,B,B,A,A,-,B,B,B,A,A,B,-,A,B,A,B,B,-,A,B,B,A,A,B,B,B,-,B,A,B,B,B,A,-,B,A,B,A
S18_1290892,,-,B,-,A,-,A,A,A,A,A,B,A,A,B,B,B,-,B,B,B,-,-,-,B,B,A,B,A,A,A,B,A,A,B,A,A,A,-,B,A,-,A,-,B,A,A,A,B,-,A,B,A,A,B,-,A,-,B,B,B,A,-,-,A,B,B,B,A,B,B,A,A,A,-,A,A,B,A,A,-,B,A,B,B,B,B,A,B,A,A,-,A,A,A,B,A,B,B,B,B,B,B,-,B,B,B,B,A,A,-,B,-,A,B,A,A,B,A,B,-,A,A,A,A,-,A,A,A,B,A,B,B,B,-,A,B,B,B,-,A,A,B,-,-,B,B,B,B,-,A,B,B,A,A,B,B,B,A,B,-,B,B,B,A,-,B,A,B,A
S18_1294611,,-,B,-,A,B,A,A,A,A,A,B,-,A,B,B,B,A,B,B,B,-,A,-,B,B,A,B,A,A,A,B,A,A,B,A,A,A,A,B,A,A,A,A,B,A,A,A,B,A,-,B,A,A,B,A,A,-,B,B,B,A,A,A,A,B,B,B,A,B,B,A,A,A,-,A,A,B,A,A,-,B,A,B,B,B,B,A,B,A,A,B,A,A,A,B,A,B,B,B,B,B,B,A,B,B,B,B,A,A,A,B,-,A,B,A,A,B,A,B,B,A,A,A,A,A,A,A,A,A,A,B,B,B,A,A,B,B,B,B,A,A,B,-,A,B,A,B,B,-,A,B,B,A,A,B,B,B,A,B,A,B,B,B,A,-,B,A,B,A
S18_1301085,,B,B,B,A,B,A,A,A,A,A,B,-,A,B,B,B,A,B,B,B,-,A,A,B,B,A,B,A,A,A,B,A,A,B,A,A,A,A,B,A,A,A,A,B,A,A,A,B,A,A,B,A,A,B,A,A,-,B,B,B,A,A,A,A,B,B,B,A,B,B,A,A,A,A,A,A,B,A,A,A,B,A,B,B,B,B,A,B,A,A,B,A,A,A,B,A,B,B,B,B,B,B,A,B,B,B,B,A,A,A,B,B,A,B,A,A,B,A,B,B,A,A,A,A,A,A,A,A,A,A,B,B,B,A,A,B,B,B,B,A,A,B,-,A,B,A,B,B,-,A,B,B,A,A,B,B,B,A,B,A,B,B,B,A,A,B,A,B,A
S18_1307365,,B,B,-,A,B,A,A,A,A,A,B,-,A,B,B,B,A,B,B,B,-,A,A,B,B,A,B,A,A,A,B,A,A,B,A,A,A,A,B,A,A,A,A,B,A,A,A,B,A,A,B,A,A,B,A,A,-,B,B,B,A,A,A,A,B,B,B,A,B,B,A,A,A,A,A,A,B,A,A,-,B,A,B,B,B,B,A,B,A,A,B,A,A,A,B,A,B,B,B,B,B,B,A,B,B,B,B,A,A,A,B,-,A,B,A,A,B,A,B,B,A,A,A,A,A,A,A,A,A,A,B,B,B,A,A,B,B,B,B,A,A,B,-,A,B,A,B,B,-,A,B,B,A,A,B,B,B,A,B,A,B,B,B,A,-,B,A,B,A
S18_1336278,,-,B,-,A,B,A,A,A,A,A,B,A,A,B,B,B,-,B,B,B,-,A,-,B,B,A,B,A,A,A,B,A,-,B,A,A,A,A,B,A,A,A,A,B,-,A,A,B,A,A,B,B,A,B,A,A,-,B,B,B,A,A,-,A,B,B,B,A,B,B,A,A,A,-,A,A,B,A,A,-,B,-,B,B,B,B,A,B,A,A,B,A,A,A,B,A,B,B,B,B,B,B,A,B,B,B,B,A,A,A,-,-,A,B,A,A,B,A,B,B,A,A,A,A,A,A,A,A,A,A,B,B,B,A,A,B,B,B,-,A,A,B,-,A,B,A,A,B,-,A,B,B,A,A,B,B,B,A,B,A,B,B,B,A,-,B,A,B,A
S18_1338201,,-,B,-,A,B,A,A,A,A,A,B,A,A,B,-,B,A,B,B,B,B,A,-,B,B,A,B,A,A,A,B,A,A,B,A,A,A,A,B,A,A,A,A,B,A,A,A,B,A,A,B,B,A,B,A,A,-,B,B,B,A,A,-,A,B,B,B,A,B,B,A,A,A,-,A,A,B,A,A,-,B,A,B,B,B,B,A,B,A,A,B,A,A,A,B,A,B,B,B,B,B,B,A,B,B,B,B,A,A,A,B,-,A,B,A,A,B,A,B,B,A,A,A,A,A,A,A,A,A,A,B,B,B,A,A,B,B,B,-,A,A,B,-,A,B,A,A,B,-,A,B,-,A,A,B,B,B,A,B,A,B,B,B,A,-,B,A,B,A
S18_1354260,,-,B,-,A,B,A,A,A,A,A,B,-,A,B,B,B,A,B,B,B,-,A,-,B,B,A,B,A,A,A,B,A,A,B,A,A,A,A,B,A,A,A,A,B,A,A,A,B,A,A,B,B,A,B,A,A,A,B,B,B,A,A,A,A,B,B,B,A,B,B,A,A,A,A,A,A,B,A,A,-,B,A,B,B,B,B,A,B,A,A,B,A,A,A,B,A,B,B,B,B,B,B,A,B,B,B,B,A,A,A,B,-,A,B,A,A,B,A,B,B,A,A,A,A,A,A,A,A,A,A,B,B,B,A,A,B,B,B,-,A,A,B,-,A,-,A,A,B,-,A,B,-,A,A,B,B,B,A,B,A,B,B,B,A,-,B,A,B,A
S18_1366137,,-,B,-,A,B,A,A,A,A,A,B,-,A,B,B,B,A,B,B,B,-,A,A,B,B,A,B,A,A,A,B,A,A,B,A,A,A,A,B,A,A,A,A,B,A,A,A,B,A,A,B,B,A,B,A,A,-,B,B,B,A,A,A,A,B,B,B,A,B,B,A,A,A,A,A,A,B,A,A,-,B,A,B,B,B,B,A,B,A,A,B,A,A,A,B,A,B,B,B,B,B,B,A,B,B,B,B,A,A,A,B,B,A,B,A,A,B,A,B,B,A,A,A,A,A,A,A,A,A,A,B,B,B,A,A,B,B,B,B,A,A,B,-,A,B,A,A,A,-,A,B,B,A,A,B,B,B,A,B,A,B,B,B,A,-,B,A,B,A
S18_1396798,,B,B,-,A,B,A,A,A,A,A,B,-,A,B,B,B,A,B,B,B,A,A,-,B,B,A,B,A,A,A,B,A,A,B,A,A,A,A,B,A,A,A,A,B,A,A,A,B,A,A,B,B,A,B,A,A,-,B,B,B,A,A,A,A,B,B,B,A,B,B,A,A,A,-,A,A,B,A,A,-,B,A,B,B,B,B,A,B,A,A,B,A,A,A,B,A,B,B,B,B,B,B,A,B,B,B,B,A,A,A,B,-,A,B,A,A,B,A,B,B,A,A,A,A,A,A,A,A,A,A,B,B,B,A,A,B,B,B,B,A,A,B,-,A,B,A,A,A,-,A,B,B,A,A,B,B,B,A,B,A,B,B,A,A,-,B,A,B,A
S19_72722,,-,B,-,A,A,A,A,A,B,B,B,B,B,A,A,B,B,A,A,-,B,A,-,B,A,A,A,B,A,B,B,B,B,B,B,B,B,A,A,A,A,B,B,B,A,-,B,A,B,B,B,A,-,B,B,A,B,A,A,B,B,B,-,B,A,A,A,A,B,B,A,B,B,-,A,B,-,A,A,-,A,A,A,B,B,A,B,B,A,A,A,B,B,A,A,A,A,A,B,B,B,B,B,A,A,A,B,A,A,B,B,-,A,A,B,B,A,B,B,A,A,B,B,A,B,A,B,A,B,A,B,A,B,A,B,B,B,B,-,A,A,A,-,B,B,B,B,A,-,B,B,B,A,A,A,A,B,B,A,A,A,A,B,B,-,B,A,B,B
S19_95260,,-,B,-,A,A,A,A,A,B,B,B,-,B,A,A,B,B,A,A,-,B,A,-,B,A,A,A,B,A,B,B,B,B,B,B,B,B,A,A,A,A,B,B,B,A,-,B,A,A,B,B,A,-,B,B,A,B,A,A,B,B,B,-,B,A,A,A,A,B,B,A,B,B,-,A,B,-,A,A,-,A,A,A,B,B,A,B,B,A,A,A,B,B,A,A,A,A,A,B,B,B,B,B,A,A,A,B,A,A,B,B,-,A,A,B,B,A,B,B,A,A,B,B,A,B,A,B,A,B,A,B,A,B,A,B,B,B,B,A,A,A,A,-,B,-,B,B,A,-,B,B,B,A,A,A,A,B,B,A,A,A,A,B,B,-,B,A,B,B
S19_123109,,-,B,-,A,A,A,-,A,-,-,B,B,B,A,A,B,B,A,-,-,B,A,-,B,A,A,A,-,A,B,-,B,-,B,B,B,B,-,A,A,A,B,B,B,A,A,B,A,-,B,B,A,-,B,B,A,-,A,A,B,B,B,-,-,A,A,A,-,B,B,-,B,B,-,A,B,-,A,A,-,A,A,A,B,B,A,B,B,A,A,A,B,B,A,A,A,-,-,B,B,B,B,B,-,A,A,B,A,A,A,B,-,A,A,B,B,A,B,B,A,A,B,B,A,B,A,-,A,B,-,B,A,B,A,-,B,B,B,-,A,A,A,-,B,B,-,B,A,-,B,B,B,A,A,A,A,B,-,A,A,A,A,B,B,-,B,A,B,-
S19_146564,,-,B,-,A,A,A,A,A,B,B,-,B,B,A,A,B,B,A,A,A,B,A,A,B,A,A,A,-,A,B,B,B,-,B,B,-,B,A,A,A,A,B,B,B,A,A,B,A,A,-,B,A,A,B,B,A,B,A,A,B,B,B,-,B,A,A,A,A,B,B,A,-,B,-,A,B,A,A,A,-,A,A,A,B,B,A,B,B,A,A,A,-,-,A,A,A,A,A,B,-,B,B,B,A,A,A,B,A,A,A,B,-,A,A,-,B,A,B,B,A,A,B,-,A,B,A,B,A,B,A,B,A,B,A,B,-,B,-,-,A,A,A,-,-,A,B,-,A,-,B,B,B,A,A,A,A,B,-,A,A,A,A,B,B,B,B,A,B,B
S19_165086,,-,B,-,B,A,A,A,A,B,B,B,B,B,A,A,B,B,A,A,A,B,A,-,B,A,A,A,B,A,B,B,B,B,B,B,B,B,A,A,A,A,B,B,B,A,-,B,A,-,B,B,A,-,B,B,A,B,A,A,B,B,B,B,B,A,A,A,A,B,B,B,B,B,-,A,B,-,A,A,-,A,A,A,B,B,A,B,B,A,A,A,B,B,A,A,A,A,A,B,B,B,B,B,A,A,A,B,A,A,A,B,B,A,A,B,B,A,B,B,A,A,B,B,A,B,A,B,A,B,A,B,A,B,A,B,B,B,B,A,A,A,A,-,B,B,B,B,A,-,B,B,B,A,A,A,A,B,-,A,A,A,A,B,B,-,B,A,B,B
S19_173400,,-,B,-,B,A,A,A,A,B,B,B,B,B,A,A,B,B,A,A,-,B,A,-,B,A,A,A,B,A,B,B,B,B,B,B,B,B,A,A,A,A,B,B,B,A,-,B,A,-,B,B,A,-,B,B,A,B,A,A,B,B,B,B,B,A,A,A,A,B,B,B,B,B,B,A,B,A,A,A,-,A,A,A,B,B,A,B,B,A,A,A,B,B,A,A,A,A,A,B,B,B,B,B,A,A,A,B,A,A,A,B,B,A,A,B,B,A,B,B,A,A,B,B,A,B,A,B,A,B,A,B,A,B,A,B,-,B,B,A,A,A,A,-,B,B,B,B,A,-,B,B,B,A,A,A,A,B,B,A,A,A,A,B,B,-,B,A,B,B
S19_219372,,-,B,-,B,A,A,-,A,B,B,B,B,B,A,A,B,B,A,A,-,B,A,-,B,A,A,A,B,A,B,B,B,-,B,B,B,B,A,A,A,A,B,B,B,A,-,B,A,-,B,A,A,-,B,B,A,B,A,A,B,B,B,B,B,A,A,A,A,B,B,B,B,B,-,A,B,-,A,A,B,A,A,A,B,B,A,B,B,A,A,A,B,B,A,A,A,A,A,B,B,B,B,B,A,A,A,B,A,A,A,B,-,A,A,B,-,A,B,B,A,A,B,B,A,B,A,B,A,B,A,B,A,B,A,A,B,B,B,-,A,A,A,-,B,B,B,B,A,-,B,B,B,A,A,A,A,B,-,A,A,A,-,B,-,-,B,B,B,B
S19_356589,,-,B,-,B,A,A,A,A,B,B,B,B,B,A,A,B,B,A,A,-,B,A,A,A,A,A,A,B,A,B,B,B,B,B,B,B,B,A,A,A,A,B,B,B,A,-,B,A,-,B,A,A,-,B,B,A,B,A,A,B,B,B,B,B,A,A,A,B,B,B,B,B,B,B,A,B,-,A,A,-,A,A,A,B,B,A,B,B,A,A,A,B,B,A,A,A,A,A,B,B,B,B,B,A,A,A,B,A,A,A,B,-,A,A,A,B,A,B,B,A,A,B,B,A,B,A,B,B,B,A,B,A,B,A,A,B,B,B,A,A,A,A,-,B,-,B,B,A,-,B,B,B,A,A,A,A,B,B,A,A,A,B,B,B,-,B,B,B,B
S19_378096,,-,B,B,B,-,A,A,A,B,B,B,B,B,A,A,B,B,A,A,-,B,A,-,A,A,A,A,B,A,B,B,B,B,B,B,B,B,A,A,A,A,B,B,B,A,A,B,A,B,B,A,A,B,B,B,A,B,A,A,B,B,B,-,B,A,A,A,B,B,B,B,B,B,B,A,B,-,A,A,B,A,A,A,B,B,A,B,B,A,A,A,B,B,A,A,A,A,A,B,B,B,B,B,A,A,A,B,A,A,A,B,-,A,A,A,B,A,B,B,A,A,B,B,A,B,A,B,B,B,A,B,A,B,A,A,B,B,B,-,A,A,A,-,B,B,B,B,A,-,B,B,B,A,A,A,A,B,B,A,B,A,B,B,B,-,B,B,B,B
S19_425721,,-,B,-,B,A,A,A,A,B,B,B,-,B,A,-,B,B,A,A,A,B,A,-,A,A,A,A,B,A,B,B,B,-,B,B,B,B,-,A,A,A,B,B,B,A,-,B,A,B,B,A,A,B,B,B,A,B,A,A,B,B,B,-,B,A,A,A,B,B,B,B,B,B,-,A,B,A,A,A,-,A,A,A,B,B,A,B,B,A,A,-,B,B,A,A,A,A,A,B,B,B,B,B,A,A,A,B,A,A,A,B,-,A,A,A,B,A,B,B,A,A,B,B,A,B,A,B,B,-,A,B,A,B,A,A,-,-,B,-,A,A,A,-,B,B,B,B,A,-,B,B,B,A,A,A,A,B,-,-,B,A,A,B,B,-,B,B,B,B
S19_427261,,-,B,-,B,A,A,A,A,B,B,B,B,B,A,A,B,B,A,A,-,B,A,-,A,A,A,A,B,A,B,B,B,B,B,B,B,B,A,A,A,A,B,B,B,A,-,B,A,B,B,A,A,B,B,B,A,B,A,A,B,B,B,B,B,A,A,A,B,B,B,B,B,B,B,A,B,-,A,A,B,A,A,A,B,B,A,B,B,A,A,A,B,B,A,A,A,A,A,B,B,B,B,B,A,A,A,B,A,A,A,B,-,A,A,A,B,A,B,B,A,A,B,B,A,B,A,B,B,B,A,B,A,B,A,A,B,-,B,-,A,A,A,-,B,B,B,B,A,B,B,B,B,A,A,A,A,B,B,A,B,A,A,B,B,B,B,B,B,B
S19_494534,,B,B,-,B,A,A,A,A,A,B,B,B,B,A,A,B,B,A,A,-,B,A,A,A,A,A,A,B,A,B,B,B,B,B,B,B,B,A,A,A,A,B,B,B,A,-,B,A,B,B,A,A,B,B,B,A,B,A,A,B,B,B,B,B,A,A,A,B,B,B,B,B,B,B,A,B,-,A,A,B,A,A,A,B,B,A,B,B,A,A,A,B,B,A,A,A,A,A,B,B,B,B,B,A,A,A,B,A,A,A,B,B,A,A,A,B,A,B,B,A,A,B,B,A,B,A,B,B,B,A,B,A,B,A,A,B,-,B,-,A,A,A,-,B,B,B,B,A,-,B,B,B,A,A,A,A,B,B,A,B,A,A,B,B,-,B,B,B,B
S19_537588,,-,B,-,B,A,A,A,A,A,B,B,B,B,A,A,B,B,A,A,-,B,A,-,A,A,A,A,B,A,B,B,B,B,B,B,B,B,A,A,A,A,B,B,B,A,A,B,A,B,B,A,A,B,B,B,A,B,A,A,B,B,B,B,B,A,A,A,B,B,B,B,B,B,B,A,B,-,A,A,-,A,A,A,B,B,A,B,B,A,A,A,B,B,A,A,A,A,A,B,B,B,B,B,A,A,A,B,A,A,A,B,-,A,A,A,B,A,B,B,A,A,B,B,A,B,A,B,B,B,A,B,A,B,A,A,B,-,B,A,A,A,A,-,B,B,B,B,A,-,B,B,B,A,A,A,A,B,B,A,A,A,A,B,B,-,B,B,B,B
S19_566635,,-,B,-,B,-,A,-,A,A,B,B,B,B,A,B,B,B,A,-,-,B,A,-,A,A,A,A,B,A,B,B,B,-,B,B,B,A,-,A,A,A,B,B,B,A,A,B,A,A,-,-,A,B,B,B,A,B,A,A,B,-,B,-,B,A,A,A,B,B,B,B,B,-,-,A,B,A,A,A,-,A,A,A,B,-,A,-,-,A,A,-,B,B,A,A,A,A,A,B,B,B,B,B,A,A,A,B,A,-,A,B,-,A,A,A,B,A,B,-,A,A,B,B,A,B,A,B,B,B,-,B,A,B,A,-,-,-,B,-,-,A,A,-,B,B,B,B,A,-,B,B,B,-,A,A,A,B,B,A,-,A,A,B,B,-,B,B,B,B
S19_587219,,-,B,-,B,A,A,A,A,A,B,B,B,B,A,B,B,B,A,A,-,B,A,A,A,A,A,A,B,A,B,B,B,B,B,B,B,A,A,A,A,A,B,B,B,A,A,B,A,A,B,A,A,B,B,B,A,B,A,A,B,B,B,B,B,A,A,A,B,B,B,B,B,B,B,A,B,-,A,A,-,A,A,A,B,B,A,B,B,A,A,A,B,B,A,A,A,A,A,B,B,B,B,B,A,A,A,B,A,A,A,B,-,A,A,A,B,A,B,B,A,A,B,B,A,B,A,B,B,B,A,B,A,B,A,A,B,-,B,A,-,A,A,-,B,B,B,B,A,B,B,B,B,-,A,A,A,B,B,A,A,-,A,B,B,-,B,B,B,B
S19_681928,,-,B,-,B,A,A,A,A,A,B,B,B,B,A,B,B,B,A,A,-,B,A,-,A,A,A,A,B,A,B,B,B,B,B,B,B,A,A,A,A,A,B,B,B,A,A,B,A,A,B,A,A,B,B,B,A,B,A,A,B,B,B,-,B,A,A,A,B,B,B,B,B,A,B,A,B,-,A,A,-,A,A,B,B,B,A,B,B,A,A,A,B,B,A,A,A,-,A,B,B,B,B,B,A,A,A,B,A,A,A,B,-,A,A,A,B,A,B,B,A,A,B,B,A,B,A,B,B,B,A,B,A,B,A,A,B,-,B,-,-,A,A,-,B,B,B,B,A,-,B,B,B,-,A,A,A,B,B,A,A,B,A,B,B,-,B,B,B,B
S19_687240,,-,B,-,B,-,A,A,A,-,-,B,-,B,A,B,B,B,A,-,B,B,A,-,-,A,A,-,B,A,B,B,B,B,B,B,B,A,A,A,A,A,B,B,B,A,A,B,A,-,B,A,A,B,B,B,A,B,A,A,B,B,B,-,B,A,-,A,B,B,B,B,B,A,B,A,B,-,A,-,-,A,A,B,B,B,-,B,B,A,A,-,B,B,A,A,A,B,A,B,B,B,B,B,A,A,A,B,A,A,-,B,-,A,-,A,B,A,B,B,A,A,B,B,A,B,A,B,B,B,A,B,-,B,A,-,B,-,B,-,-,A,A,-,B,-,B,B,A,-,B,B,B,-,A,A,A,B,B,-,A,B,A,B,B,B,B,B,B,B
S19_691701,,-,B,-,B,A,A,A,A,A,A,B,B,B,A,B,B,B,A,A,-,B,A,-,A,A,A,A,B,A,B,B,B,-,B,B,B,A,A,A,A,A,B,B,B,-,-,B,A,A,B,A,A,B,B,B,A,B,A,A,B,-,B,-,B,A,A,-,B,B,B,B,B,A,-,A,B,-,A,A,-,A,A,B,B,B,A,B,B,A,A,-,B,-,A,A,A,A,A,B,B,B,B,B,A,A,A,B,A,A,A,B,-,A,A,A,B,A,B,B,A,A,B,B,A,B,A,B,B,B,A,B,A,B,A,-,-,-,B,-,A,A,A,-,B,B,B,B,A,-,B,A,B,-,A,A,A,B,B,A,A,B,A,B,B,-,B,B,B,B
S19_703450,,-,B,-,B,A,A,A,A,A,A,B,B,B,A,B,B,B,A,A,-,B,A,-,A,A,A,A,B,A,B,B,B,B,B,B,B,A,A,A,A,A,B,B,B,A,A,B,A,A,B,A,A,B,B,B,A,B,A,A,B,B,B,B,B,A,A,A,B,B,B,B,B,A,-,A,B,-,A,A,-,A,A,B,B,B,A,B,B,A,A,A,B,B,A,A,A,-,A,B,B,B,B,B,A,A,A,B,A,A,A,B,-,A,A,A,B,A,B,B,A,A,B,B,A,B,A,B,B,B,A,B,A,B,A,A,-,-,B,A,A,A,A,-,B,B,B,B,A,-,B,A,-,-,A,A,A,B,B,A,A,B,A,B,B,-,B,B,B,B
S19_742969,,-,B,-,B,A,A,A,A,A,A,B,B,B,A,B,B,B,A,A,-,B,A,-,A,A,A,A,B,A,B,B,B,B,B,B,B,A,A,A,A,A,B,B,B,A,A,B,A,A,B,A,A,B,B,B,A,B,A,A,B,B,B,B,B,A,A,A,B,B,B,B,B,A,-,A,B,-,A,A,-,A,A,B,B,B,A,B,B,A,A,A,B,B,A,A,A,-,A,B,B,B,B,B,A,A,A,A,A,A,A,B,-,A,A,A,B,A,B,B,A,A,B,B,A,B,A,B,B,B,A,B,A,B,A,A,B,-,B,A,A,A,A,-,B,B,B,B,A,-,B,A,B,-,A,A,A,B,B,A,A,B,A,B,B,-,B,B,B,B
S19_771394,,-,B,-,B,A,A,A,A,A,A,B,-,B,A,B,B,B,A,A,-,B,A,-,A,A,A,A,B,A,B,B,B,B,B,B,B,A,-,A,A,-,B,B,B,A,A,B,A,A,B,A,A,B,-,B,A,B,A,A,B,B,B,-,B,A,A,A,B,B,B,B,-,A,-,A,-,-,A,A,B,A,A,B,B,B,A,B,B,A,A,A,B,B,A,A,A,B,A,B,B,B,B,B,A,A,A,A,A,A,A,B,-,A,A,A,B,-,B,B,A,A,B,B,A,B,A,B,B,B,A,B,A,B,A,A,B,-,-,-,A,A,A,-,B,B,B,B,A,-,B,A,B,-,A,A,A,B,B,A,A,B,A,B,B,-,B,B,B,B
S19_772452,,-,B,-,B,A,A,A,A,A,A,B,B,B,A,-,B,B,A,A,-,B,A,-,A,A,A,A,B,A,B,B,B,B,B,-,B,A,A,A,A,A,B,B,B,-,A,B,A,A,B,A,-,B,-,B,A,B,A,A,B,B,B,B,B,A,A,A,B,B,B,B,B,A,-,A,B,-,A,A,-,A,A,B,-,B,A,B,B,A,A,-,B,-,A,A,A,A,A,B,B,B,B,B,-,A,A,A,-,A,A,B,-,A,A,A,B,A,B,B,-,A,B,B,A,B,A,B,B,B,A,B,A,B,A,A,B,-,B,-,A,A,A,-,B,B,B,B,A,-,B,A,B,-,A,A,A,B,-,A,A,B,A,B,B,-,B,B,B,B
S19_797802,,-,B,-,B,A,A,A,A,A,A,B,B,B,A,B,B,B,A,A,-,B,A,A,A,A,A,A,B,A,B,B,B,B,B,B,B,A,A,A,A,A,B,B,B,A,A,B,A,A,B,A,A,B,B,B,A,B,A,A,B,B,B,B,B,A,A,A,B,B,B,B,B,A,B,A,-,-,A,A,-,A,A,B,B,B,A,B,B,A,A,A,B,B,A,A,A,-,A,B,B,B,B,B,A,A,A,A,B,A,A,B,-,A,A,A,B,A,B,B,A,A,B,B,A,B,A,B,B,B,A,B,A,B,A,A,-,-,B,A,A,A,A,-,B,-,B,B,A,-,B,A,B,-,A,A,A,B,B,A,A,B,A,B,B,-,B,B,B,B
S19_853827,,-,B,-,B,A,A,A,A,A,A,B,B,B,A,B,B,B,A,A,-,B,A,A,A,A,A,A,B,A,B,B,B,B,B,B,B,A,A,A,A,A,B,B,B,B,A,B,A,A,B,A,A,B,B,B,A,B,A,A,B,B,B,B,B,A,A,A,B,B,B,B,B,A,B,-,-,-,A,A,B,A,A,B,-,B,A,B,B,A,A,A,B,B,A,A,A,B,A,B,B,B,B,B,A,A,A,A,B,A,A,B,-,A,A,A,B,A,B,B,A,A,B,B,A,B,A,B,B,B,A,B,A,B,A,A,B,-,B,-,-,A,A,-,B,B,B,B,A,-,B,A,B,-,A,A,A,B,B,B,A,B,A,B,B,-,B,B,B,B
S19_864053,,-,B,-,-,A,A,A,A,A,A,B,B,B,A,-,B,B,-,A,-,B,A,-,A,A,A,A,B,A,B,B,-,-,B,-,-,A,-,A,A,A,B,B,B,B,A,B,A,A,B,A,A,B,B,B,A,B,A,A,B,B,B,B,B,A,A,-,B,B,B,B,B,A,-,A,A,-,A,A,-,A,A,B,B,B,A,B,B,A,A,-,B,B,A,A,A,B,A,B,-,B,-,B,A,-,A,A,B,A,A,B,-,A,A,A,-,A,B,B,A,A,B,B,A,B,A,B,B,-,A,B,A,B,A,A,B,-,B,-,-,A,A,-,B,B,B,B,A,-,B,A,-,-,A,A,A,B,B,B,A,B,A,B,B,-,B,B,B,B
S19_870674,,-,B,-,B,A,A,A,A,A,A,B,B,B,A,-,B,B,A,-,-,B,A,-,A,A,A,A,-,A,B,B,B,B,B,B,B,A,A,A,A,A,B,B,B,B,A,B,A,A,B,A,A,B,B,B,A,B,A,A,B,B,B,-,B,A,A,A,B,B,B,B,B,A,B,A,-,-,A,A,-,A,A,B,-,B,A,B,B,A,A,A,B,B,A,A,A,B,A,B,B,B,B,B,A,A,A,A,B,A,A,B,-,A,A,A,B,A,B,B,A,A,B,B,A,B,A,B,B,B,A,B,A,B,A,A,-,-,B,-,-,A,A,-,B,B,B,B,A,-,B,A,B,-,A,A,A,B,B,B,A,B,A,B,B,-,B,B,B,B
S19_886551,,-,B,B,B,-,A,-,A,A,A,B,B,B,A,-,B,B,A,-,A,B,A,-,A,A,A,A,B,A,B,B,B,-,B,B,B,A,A,A,A,A,B,B,B,-,A,B,A,A,B,A,A,B,B,B,A,B,A,A,B,B,B,-,B,A,-,A,B,B,B,B,B,A,-,A,B,-,A,A,-,A,A,B,B,B,A,B,-,A,A,A,B,-,A,A,A,-,A,B,B,B,B,B,A,A,-,A,B,A,A,-,-,A,A,A,B,A,B,B,-,A,B,B,A,B,A,B,B,-,A,B,A,B,A,-,-,A,B,A,-,A,A,-,B,B,B,B,A,-,B,A,B,-,A,A,A,B,B,B,A,B,A,B,B,-,B,B,B,B
S19_896127,,-,B,-,B,A,A,A,A,A,A,B,B,B,A,-,B,B,A,A,A,B,A,-,A,A,A,A,B,A,B,B,B,B,B,B,B,A,-,A,A,A,B,B,B,-,A,B,A,A,B,A,A,B,B,B,A,B,A,A,B,B,B,B,B,A,A,A,B,B,B,B,B,A,-,A,B,A,A,A,B,A,A,B,-,B,A,B,B,A,A,A,B,B,A,A,A,B,A,B,B,B,B,B,A,A,A,A,B,A,A,B,-,A,A,A,B,A,B,B,A,A,B,B,A,B,A,B,B,B,A,B,A,B,A,A,B,-,B,A,-,A,A,-,B,B,B,B,A,-,B,A,B,-,A,A,A,B,-,B,A,B,A,B,B,-,B,B,B,B
S19_927958,,-,B,-,B,A,A,A,A,A,A,B,B,B,A,B,B,B,A,A,A,B,A,A,A,A,A,A,A,A,B,B,B,B,B,B,B,A,A,A,A,A,B,B,B,B,A,B,A,A,B,A,A,B,B,B,A,B,A,A,B,B,B,B,B,A,A,A,B,B,B,B,B,A,B,A,-,-,A,A,B,A,A,B,-,B,A,B,B,A,A,A,B,B,A,A,B,B,A,B,B,B,B,B,A,A,A,A,B,A,A,B,-,A,A,A,B,A,B,B,A,A,B,B,A,B,A,B,B,B,A,B,A,B,A,B,B,-,B,A,B,A,A,-,B,B,B,B,A,-,B,A,B,-,A,A,A,B,B,B,A,B,A,B,B,-,B,B,B,B
S19_945492,,-,B,-,B,A,A,A,A,A,A,B,B,B,A,B,B,B,A,A,A,B,A,A,A,A,A,A,A,A,B,B,B,B,B,B,B,A,A,A,A,A,B,B,B,B,A,B,A,A,B,A,A,B,B,B,A,B,A,A,B,B,B,B,B,A,A,A,B,B,B,B,B,A,-,A,B,-,A,A,B,A,A,B,-,B,A,B,B,A,A,A,B,B,A,A,B,B,A,B,B,B,B,B,A,A,A,A,B,A,A,B,B,A,A,A,B,A,B,B,A,A,B,B,A,B,A,B,B,B,A,B,A,B,A,B,B,-,B,A,-,A,A,-,B,B,B,B,A,-,B,A,B,-,A,A,A,B,B,B,A,B,A,B,B,-,B,B,B,B
S19_980964,,-,B,-,B,A,A,A,A,A,A,B,B,B,A,B,B,B,A,A,A,B,A,A,A,A,A,A,A,A,B,B,B,B,B,B,B,A,A,A,A,A,B,B,B,B,A,B,A,A,B,A,A,B,B,B,A,B,A,A,B,B,B,B,B,A,A,A,B,B,-,B,B,A,B,A,-,-,A,A,B,A,A,B,-,B,A,B,B,A,A,A,B,B,A,A,B,B,A,B,B,B,B,B,A,A,A,A,B,A,A,B,B,A,A,A,B,A,B,B,A,A,B,B,A,B,A,B,B,B,A,B,A,B,A,B,B,-,B,A,-,A,A,-,B,B,B,B,A,B,B,A,B,-,A,A,A,B,B,B,A,B,A,B,B,-,B,B,B,B
S19_990250,,-,B,-,B,A,A,A,A,A,A,B,B,B,A,B,B,B,A,A,A,B,A,-,A,A,A,A,A,A,B,B,B,B,B,B,B,A,A,A,A,A,B,B,B,B,A,B,A,A,B,A,A,B,B,B,A,B,A,A,B,B,B,B,B,A,A,A,B,B,-,B,B,A,-,A,-,A,A,A,B,A,A,B,B,B,A,B,B,A,A,A,B,B,A,A,B,B,A,B,B,B,B,B,A,A,A,A,B,A,A,B,-,A,A,A,B,A,B,B,A,A,B,B,A,B,A,B,B,-,A,B,A,B,A,B,-,-,B,A,-,A,A,-,B,-,B,B,A,-,B,A,B,-,A,A,A,B,-,B,A,B,A,B,B,-,B,B,B,B
S19_993953,,-,B,-,B,A,A,A,A,A,A,B,B,B,A,B,B,B,A,A,A,B,A,A,A,A,A,A,A,A,B,B,B,B,B,B,B,A,A,A,A,A,B,B,B,B,A,B,A,A,B,A,A,B,B,B,A,B,A,A,B,B,B,B,B,A,A,A,B,B,A,B,B,A,-,A,-,-,A,A,B,A,A,B,-,B,A,B,B,A,A,A,B,B,A,A,B,B,A,B,B,B,B,B,A,A,A,A,B,A,A,B,-,A,A,A,B,A,B,B,A,A,B,B,A,B,A,B,B,B,A,B,A,B,A,B,B,A,B,A,-,A,A,-,B,B,B,B,A,-,B,A,B,-,A,A,A,B,B,B,A,B,A,B,B,-,B,B,B,B
S19_1035006,,B,B,-,B,A,A,A,A,A,A,B,B,B,A,B,B,B,A,A,A,B,A,-,A,A,A,A,A,A,B,B,B,B,B,B,B,A,A,A,A,A,B,B,B,B,A,B,A,A,B,A,B,B,B,B,A,B,A,A,B,B,B,-,A,A,A,A,B,B,-,B,B,A,B,A,-,-,A,A,-,A,A,B,-,B,A,B,B,A,A,A,B,B,A,A,B,B,A,B,B,B,B,B,A,A,A,A,B,A,A,B,-,A,A,A,B,A,B,B,A,-,B,B,A,B,A,B,B,B,A,B,A,B,A,B,B,-,B,A,-,A,A,-,B,-,B,B,A,-,B,A,B,-,A,A,A,B,B,B,A,B,A,B,B,-,B,B,B,B
S19_1150334,,-,B,-,B,A,A,A,A,A,A,B,B,B,A,B,B,B,A,A,A,B,A,-,A,A,A,A,A,A,B,B,A,B,B,B,B,A,A,B,A,A,B,B,B,B,A,B,A,A,B,A,B,A,B,B,A,B,A,A,B,B,B,B,A,A,A,A,B,B,A,B,B,A,-,A,-,B,A,A,-,A,A,B,B,B,A,B,B,A,A,A,A,B,A,A,B,B,A,B,B,B,A,B,A,A,A,A,B,A,A,B,B,A,A,A,B,A,B,B,A,-,B,B,A,A,A,B,B,B,A,B,A,B,A,B,B,B,A,A,B,A,A,-,B,-,B,B,A,-,B,A,B,B,A,A,A,B,B,B,A,B,A,B,B,-,B,B,B,B
S19_1157776,,-,B,-,B,A,A,A,A,A,A,B,B,B,A,B,B,B,A,A,A,B,A,-,A,A,A,A,-,A,B,B,-,B,B,B,B,A,A,B,A,A,B,B,B,B,A,B,A,A,B,A,B,A,B,B,A,B,A,A,B,B,B,-,A,A,A,A,B,B,A,B,B,A,-,A,B,B,A,A,-,A,A,B,B,B,A,B,B,A,A,A,A,B,A,-,B,B,A,B,B,B,A,B,A,A,A,A,B,A,A,B,-,A,A,A,B,A,B,B,A,-,B,B,A,A,A,B,B,B,A,B,A,B,A,B,-,B,A,-,B,A,A,-,B,-,B,B,A,-,B,A,A,B,A,A,A,B,B,B,A,B,A,B,B,-,B,B,B,B
S19_1186282,,-,B,-,B,A,A,A,A,A,A,B,B,B,A,B,B,B,A,A,A,B,A,A,A,A,A,A,A,A,B,B,A,B,B,B,B,A,A,B,A,A,B,B,B,B,A,B,A,A,B,A,B,A,B,B,A,B,A,A,B,B,B,B,A,A,A,A,B,B,A,B,B,A,B,A,-,B,A,A,B,A,A,B,A,B,A,B,B,A,A,A,A,B,A,A,B,B,A,B,B,B,A,B,A,A,A,A,B,A,A,B,-,A,A,A,B,A,B,B,A,-,B,B,A,A,A,B,B,B,A,B,A,B,A,B,B,B,A,A,B,A,A,-,B,-,B,B,A,B,B,A,A,B,A,A,A,B,B,B,A,B,A,B,B,B,B,B,B,B
S19_1191102,,-,B,-,B,A,A,-,A,A,A,B,B,B,A,-,B,B,A,A,A,B,A,-,A,A,A,A,A,A,B,B,A,B,B,B,B,A,A,B,A,A,B,B,B,-,A,B,A,A,B,A,B,A,B,B,A,B,A,A,B,B,B,B,A,A,A,A,B,B,A,B,B,A,-,A,-,B,A,A,-,A,A,B,A,B,A,B,B,A,A,A,A,B,A,A,B,B,A,B,B,B,A,B,A,A,A,A,B,A,A,B,-,A,A,A,B,A,B,B,A,-,B,B,A,A,A,B,B,B,A,B,A,B,A,B,B,B,A,-,B,A,A,-,B,-,B,B,A,-,B,A,B,B,A,A,A,B,-,B,A,B,A,B,B,-,B,B,B,B
S19_1201025,,-,B,-,B,A,A,A,A,A,A,B,B,B,A,B,A,B,A,A,A,B,A,A,A,A,A,A,A,A,B,B,A,B,B,B,B,A,A,B,A,A,B,B,B,B,A,B,A,A,B,A,B,A,B,B,A,B,A,A,B,B,B,B,A,A,A,A,B,B,A,B,B,A,B,A,B,B,A,A,B,A,A,B,A,B,A,B,B,A,A,A,A,B,A,A,B,B,A,B,B,B,A,B,A,A,A,A,B,A,A,B,B,A,A,A,B,A,B,B,A,-,B,B,A,A,A,B,B,B,A,B,A,B,A,B,B,B,A,A,B,A,A,-,B,B,B,B,A,-,B,A,-,B,A,A,A,B,B,B,A,B,B,B,B,-,B,B,B,B
S19_1257885,,-,B,-,B,A,A,A,A,A,A,B,-,B,A,B,A,B,A,A,A,B,A,-,A,A,A,A,A,A,B,B,A,B,B,B,B,A,-,B,A,A,B,B,B,B,A,B,A,A,B,A,B,A,B,B,A,B,A,A,B,B,B,B,A,A,B,A,B,B,A,B,B,A,-,A,-,B,A,A,-,A,A,B,A,B,A,B,B,A,A,A,A,B,A,A,B,B,A,B,B,B,A,B,A,A,A,A,B,A,A,B,-,A,A,A,B,A,B,B,A,A,B,B,A,A,A,-,B,B,A,B,A,B,A,-,B,B,A,-,B,A,A,-,B,-,B,B,A,-,B,A,A,B,A,A,A,B,B,B,A,B,B,B,B,-,B,B,B,B
S19_1344823,,-,B,-,B,A,A,A,A,A,A,B,B,B,A,B,A,B,A,A,A,B,A,-,A,A,A,A,A,A,B,B,A,B,B,B,B,A,A,B,A,A,B,B,B,B,A,B,A,A,B,A,B,A,B,B,A,B,A,A,B,B,B,B,A,A,B,A,B,B,A,B,B,A,-,A,-,B,A,A,-,A,A,B,A,B,A,B,B,A,A,A,A,B,A,A,B,B,A,B,B,B,A,B,A,A,A,A,B,A,A,B,-,A,A,A,B,A,B,B,A,-,A,B,A,A,A,-,B,B,A,B,A,B,A,A,B,B,A,-,B,A,A,-,B,B,B,B,A,B,B,A,-,B,A,A,A,B,B,B,B,B,B,B,B,-,B,B,B,B
S19_1354659,,B,B,-,B,A,A,A,A,A,A,B,B,B,A,B,A,B,A,A,A,B,A,A,A,A,A,A,A,A,B,B,A,B,B,B,B,A,A,B,A,A,B,B,B,B,A,B,A,A,B,A,B,A,B,B,A,B,A,A,B,B,B,B,A,A,B,A,B,B,A,B,B,A,-,A,-,B,A,A,B,A,A,B,A,B,A,B,B,A,A,A,A,B,A,A,B,B,A,B,B,B,A,B,A,A,A,A,B,A,A,B,-,A,A,A,B,A,B,B,A,-,-,B,A,A,A,B,B,B,A,B,A,B,A,A,B,B,A,A,B,A,A,-,B,B,B,B,A,-,B,A,-,B,A,A,A,B,B,B,B,B,B,B,B,-,B,B,B,B
S19_1357605,,-,B,-,B,A,A,A,A,A,A,B,-,B,A,B,A,B,A,A,A,B,A,-,A,A,A,A,A,A,B,B,A,B,B,B,B,A,A,B,A,A,B,B,B,-,A,B,A,A,B,A,B,A,B,B,A,B,A,A,B,B,B,-,A,A,B,A,B,B,A,B,B,A,-,A,-,B,A,A,B,A,A,B,A,B,A,B,B,A,A,A,A,B,A,A,B,B,A,B,B,B,A,B,A,A,A,A,B,A,A,B,-,A,A,A,B,A,B,B,A,-,-,B,A,A,A,-,B,B,A,B,A,B,A,A,B,B,A,-,B,A,A,-,B,B,B,B,A,B,B,A,-,B,A,A,A,B,B,B,B,B,B,B,B,-,B,B,B,B
S19_1366403,,-,B,-,B,A,A,A,A,A,A,B,B,B,A,B,A,B,A,A,A,B,A,A,A,A,A,A,A,A,B,B,A,B,B,B,B,A,A,B,A,A,B,B,B,B,A,B,A,A,B,A,B,A,B,B,A,B,A,A,B,B,B,B,A,A,B,A,B,B,A,B,B,A,B,A,B,B,A,A,B,A,A,B,A,B,A,B,B,A,A,A,A,B,A,A,B,B,A,B,B,B,A,B,A,A,A,A,B,A,A,B,-,A,A,A,B,A,B,B,A,-,-,B,A,A,A,-,B,B,A,B,A,B,A,A,B,B,A,A,B,A,A,-,B,B,B,B,A,-,B,A,A,B,A,A,A,B,B,B,B,B,B,B,B,-,B,B,B,B
S19_1399644,,-,B,-,B,A,A,A,A,A,A,B,B,B,A,B,A,B,A,A,A,B,A,A,B,A,A,A,A,A,B,B,A,B,B,B,B,A,A,B,A,A,B,B,B,B,A,B,A,A,B,A,B,A,B,B,A,B,A,A,B,B,B,B,A,A,B,A,B,B,A,B,B,A,B,A,-,B,A,A,-,A,A,B,A,B,A,A,B,A,A,A,A,B,A,A,B,B,A,B,B,B,A,B,A,A,A,A,B,A,A,B,-,A,A,A,B,A,B,B,A,-,-,B,B,A,A,-,B,B,A,B,A,B,A,A,B,B,A,A,B,A,A,-,B,B,B,B,B,-,B,A,B,B,A,A,A,B,B,B,B,B,B,B,B,-,B,B,B,B
S19_1418364,,-,B,-,B,-,A,A,A,A,A,B,-,B,A,B,A,B,A,A,A,B,A,-,B,A,A,A,A,A,B,B,A,B,B,B,B,A,-,B,A,A,B,B,B,B,A,B,A,A,B,A,B,-,B,B,A,B,A,A,B,B,B,-,A,A,B,-,B,B,A,B,B,A,B,A,B,B,A,A,-,A,A,B,A,B,A,A,B,A,A,-,A,B,A,-,B,B,A,B,B,B,A,B,A,A,A,A,B,-,A,B,-,A,A,A,B,A,B,B,-,B,-,B,B,A,A,B,B,B,-,B,A,B,-,A,-,B,A,-,B,A,A,-,B,B,B,B,B,-,B,B,B,B,A,A,A,B,B,B,B,B,B,B,B,-,B,B,B,B
S19_1419797,,-,B,-,B,A,A,A,A,A,A,B,B,B,A,B,A,B,A,A,A,B,A,-,B,A,A,A,A,A,B,B,A,B,B,B,B,A,A,B,A,A,B,B,B,B,A,B,A,A,B,A,B,A,B,B,A,B,A,A,B,B,B,B,A,A,B,A,B,B,A,B,B,A,B,A,-,B,A,A,B,A,A,B,A,B,A,A,B,A,A,A,A,B,A,A,B,B,A,B,B,B,A,B,A,A,A,A,B,A,A,B,-,A,A,A,B,A,B,B,A,-,-,B,B,A,A,-,B,B,A,B,A,B,A,A,B,B,A,A,B,A,A,-,B,B,B,B,B,-,B,B,B,B,A,A,A,B,B,B,B,B,B,B,B,-,B,B,B,B
S19_1420856,,-,B,B,B,A,A,A,A,A,A,B,B,B,A,B,A,B,A,A,A,B,A,A,B,A,A,A,A,A,B,B,A,B,B,B,B,A,-,B,A,A,B,B,B,B,A,B,A,A,B,A,B,A,B,B,A,B,A,A,B,B,B,-,A,A,B,A,B,B,A,B,B,A,B,A,-,B,A,A,-,A,A,B,A,B,A,A,B,A,A,A,A,B,A,A,B,B,A,B,B,B,A,B,A,A,A,A,B,A,A,B,B,A,A,A,B,A,B,B,A,-,-,B,B,A,A,-,B,B,A,B,A,B,A,A,B,B,A,A,B,A,A,-,B,B,B,B,B,-,B,B,B,B,A,A,A,B,B,B,B,B,B,B,B,-,B,B,B,B
S19_1426603,,-,B,-,B,A,A,A,A,A,A,B,B,B,A,B,A,B,A,A,A,B,A,-,B,A,A,A,A,A,B,B,A,B,B,B,B,A,A,B,A,A,B,B,B,B,A,B,A,A,B,A,B,A,B,B,A,B,A,A,B,B,B,-,A,A,B,A,B,B,A,B,B,A,-,A,-,B,A,A,B,A,A,B,A,B,A,A,B,A,A,A,A,B,A,A,B,B,A,B,B,B,A,B,A,A,A,A,B,A,A,B,B,A,A,A,B,A,B,B,A,-,-,B,B,A,A,-,B,B,A,B,A,B,A,A,B,B,A,A,B,A,A,-,B,B,B,B,B,-,B,B,B,B,A,A,A,B,B,B,B,B,B,B,B,-,B,B,B,B
S19_1427673,,-,B,-,B,A,A,A,A,A,A,B,-,B,A,B,A,B,A,A,A,B,A,-,B,A,A,A,A,A,B,B,A,B,B,B,B,A,A,B,A,A,B,B,B,B,A,B,A,A,B,A,B,A,B,B,A,B,A,A,B,B,B,B,A,A,B,A,B,B,A,B,B,A,-,A,-,B,A,A,-,A,A,B,A,B,A,-,-,A,A,A,A,B,A,A,B,B,A,B,B,B,A,B,A,A,A,A,B,A,A,B,-,A,A,A,B,A,B,B,A,-,-,B,B,A,A,B,B,B,A,B,A,B,A,A,-,B,A,A,B,A,A,-,B,-,B,B,B,-,B,B,-,B,A,A,A,B,B,B,B,B,B,B,B,-,B,B,B,B
S19_1517086,,-,B,-,B,B,A,A,A,A,-,B,-,B,A,B,A,B,-,A,A,B,A,-,B,A,A,A,A,A,B,B,A,B,B,B,B,A,A,B,A,A,B,B,B,B,A,B,A,A,B,A,B,A,B,B,A,B,A,A,B,-,B,-,A,A,B,A,B,B,A,B,B,A,B,A,-,B,A,A,-,A,A,B,A,B,-,A,B,A,A,A,A,B,A,A,B,B,A,B,B,B,A,B,A,A,A,A,A,A,A,B,-,A,A,A,-,A,B,B,A,-,A,B,B,A,A,B,B,B,A,B,A,B,A,A,B,B,A,A,B,A,A,-,B,-,B,B,B,-,B,B,-,B,A,A,A,B,B,B,B,B,B,B,B,-,B,B,B,B
S19_1560524,,-,B,-,B,B,A,-,A,A,A,B,B,B,A,B,A,B,A,A,A,-,A,-,B,A,A,A,A,A,B,B,-,-,B,B,B,A,-,B,A,A,B,B,B,-,A,B,A,A,B,A,B,A,B,B,A,B,A,A,B,B,B,B,A,A,B,A,B,B,A,B,B,A,-,A,A,B,A,A,-,A,A,B,A,B,A,A,B,A,A,-,A,B,A,A,B,B,A,B,-,B,A,B,A,A,A,A,-,A,A,B,-,A,A,A,-,A,B,B,A,-,A,B,B,A,A,A,B,-,A,B,A,B,A,A,-,B,A,A,B,A,A,-,B,B,B,B,B,-,B,B,B,B,A,A,A,B,-,B,B,B,B,B,B,-,B,A,B,B
S19_1612501,,-,B,-,B,B,A,-,A,A,A,B,B,B,A,A,A,B,A,A,A,B,A,A,B,A,A,A,A,A,B,B,B,B,B,B,B,A,A,B,A,A,B,B,B,B,A,B,A,A,B,A,B,A,B,B,A,B,A,A,B,B,B,B,A,A,B,A,B,B,A,B,B,A,-,A,A,B,A,A,-,A,A,B,A,B,A,A,B,A,A,A,A,B,A,A,B,B,A,B,B,B,A,B,A,A,A,A,A,A,A,B,B,A,A,A,B,A,B,B,A,A,A,B,B,A,A,A,B,B,A,B,A,B,A,A,-,B,A,-,B,A,A,-,B,-,B,B,B,-,B,B,B,B,A,A,A,B,-,B,B,B,B,B,B,-,B,A,B,B
S19_1627848,,-,B,-,B,B,A,B,A,A,A,B,B,B,A,A,A,B,A,A,A,B,A,A,B,A,A,A,A,A,B,B,B,B,B,B,B,A,A,B,A,A,B,B,B,B,A,B,A,A,B,A,B,A,B,B,A,B,A,A,B,B,B,-,A,A,B,A,B,B,A,B,B,A,-,A,A,B,A,A,-,A,A,B,A,B,A,A,B,A,A,A,A,B,A,A,B,B,A,B,B,B,A,B,A,A,A,A,A,A,A,B,-,A,A,A,B,A,B,B,A,-,A,B,B,A,A,A,B,B,A,B,A,B,A,A,B,B,A,-,B,A,A,-,B,B,B,B,B,-,B,B,A,B,A,A,A,B,-,B,B,B,B,-,B,-,B,A,B,B
S19_1658347,,-,B,-,B,B,A,B,A,A,A,B,B,B,A,A,A,B,A,A,A,B,A,A,B,A,A,A,-,A,-,B,B,B,B,B,B,A,A,B,A,A,B,B,B,B,A,B,A,A,B,A,B,A,B,B,A,B,A,A,B,-,B,-,A,A,B,A,B,B,A,B,B,B,-,A,A,B,A,A,-,A,A,B,A,B,A,A,B,A,A,A,A,B,A,A,B,B,A,B,B,B,A,B,A,A,A,A,A,A,A,B,-,A,A,A,-,A,B,-,A,-,A,B,B,A,A,A,B,-,A,B,A,B,A,A,B,B,A,-,B,A,A,-,B,B,B,B,B,-,B,-,A,B,A,A,A,B,-,B,B,B,B,B,B,-,B,A,B,B
S19_1721645,,-,B,-,B,B,A,B,A,A,A,B,B,B,A,A,A,B,A,A,A,B,A,A,B,A,A,A,A,A,B,B,B,B,B,B,B,A,-,B,A,A,B,B,B,B,A,B,A,A,B,A,B,A,B,B,A,B,A,A,B,B,B,B,A,A,B,A,B,B,A,B,B,B,B,A,A,B,A,A,B,A,A,B,A,B,A,A,B,A,A,-,A,B,A,A,B,-,A,B,B,B,A,B,A,A,A,A,A,A,A,B,B,A,A,A,B,A,B,B,A,-,A,B,B,A,A,A,B,B,A,B,A,B,A,A,-,B,A,-,B,-,A,-,B,B,B,B,B,-,B,B,B,B,A,A,A,B,A,B,B,B,B,B,B,-,B,A,B,B
S19_1723226,,-,B,-,-,B,A,B,A,A,A,B,B,B,A,A,A,B,A,A,A,B,A,-,B,A,A,A,A,A,B,B,B,B,B,B,B,A,A,B,A,A,B,B,B,B,A,B,A,A,B,A,B,A,B,B,A,B,A,A,B,B,B,-,A,A,B,A,B,B,A,B,B,B,B,A,A,B,A,A,-,A,A,B,A,B,A,A,B,A,A,-,A,B,A,A,B,-,A,B,B,B,A,B,A,A,A,A,A,A,A,B,-,A,A,A,B,A,B,B,A,-,A,B,B,A,A,A,B,B,A,B,A,B,A,A,B,B,A,A,B,-,A,-,B,B,B,B,B,-,B,B,-,B,A,A,A,B,A,B,B,B,B,B,B,-,B,A,B,B
S19_1736403,,-,B,-,B,B,A,B,A,A,A,B,B,B,A,-,A,B,A,A,A,B,A,-,B,A,-,A,-,A,B,B,-,B,B,B,-,A,A,B,A,A,B,B,B,-,A,B,A,A,B,A,B,-,B,B,A,B,A,A,B,-,B,-,A,A,B,A,B,B,A,B,B,B,-,A,A,B,A,A,-,A,A,B,A,B,A,A,B,A,A,A,A,B,A,A,B,-,A,B,-,B,A,B,-,A,A,A,-,-,A,-,-,A,A,A,B,-,B,-,A,-,A,B,B,A,A,A,B,B,A,B,A,B,A,A,B,B,A,-,B,-,A,-,B,B,B,B,B,-,B,B,-,B,A,-,A,B,A,B,B,B,B,B,B,-,B,-,B,B
S19_1750824,,-,B,-,B,B,A,B,A,A,A,B,B,B,A,-,A,-,A,A,A,B,A,A,B,A,A,A,A,A,B,B,B,-,B,B,B,A,A,B,A,A,B,B,B,B,A,B,A,A,B,A,B,A,B,B,A,B,A,A,B,B,B,-,A,A,B,A,B,B,A,B,B,B,-,A,A,B,A,A,-,A,A,B,-,B,A,-,B,A,A,-,A,B,A,A,B,-,A,B,B,B,A,B,A,A,A,A,A,A,A,B,-,A,A,A,-,A,B,-,A,-,A,B,B,A,A,A,B,B,A,B,A,B,A,A,B,B,A,-,B,-,A,-,B,B,B,B,B,-,B,B,-,B,A,A,A,B,A,B,B,B,B,B,B,-,B,A,B,B
S19_1757956,,-,B,-,B,B,A,B,A,A,A,B,B,B,A,A,A,B,A,A,A,B,A,A,B,A,A,A,A,A,B,B,B,B,B,B,B,A,A,B,A,A,B,B,B,B,A,B,A,A,B,A,B,A,B,B,A,B,A,A,B,B,B,B,A,A,B,A,B,B,A,B,B,B,-,A,A,B,A,A,-,A,A,B,A,B,A,A,B,A,A,A,A,B,A,A,B,-,A,B,B,B,A,B,A,A,A,A,A,A,A,B,B,A,A,A,B,A,B,B,A,-,A,B,B,A,A,A,B,B,A,B,A,B,A,A,B,B,A,A,B,-,A,-,B,B,B,B,B,-,A,B,-,B,A,A,A,B,A,B,B,B,B,B,B,-,B,A,B,B
S19_1854507,,-,B,-,B,-,A,-,A,A,A,B,-,B,A,A,A,B,B,A,A,B,A,A,B,A,A,A,A,A,A,B,B,B,B,B,B,A,A,B,B,A,B,B,B,A,A,B,A,A,B,A,B,A,B,B,A,B,A,A,B,B,B,-,A,A,B,A,B,B,A,B,B,B,-,A,A,B,A,A,-,A,A,B,A,B,A,A,B,A,A,-,A,B,A,A,B,A,A,B,B,A,A,B,A,A,A,A,A,A,A,B,-,A,A,A,B,A,B,B,A,-,A,B,B,A,A,A,B,-,A,B,A,B,A,A,-,B,A,-,B,-,A,-,B,B,B,B,B,-,A,B,B,B,A,A,A,B,A,B,B,B,B,B,B,B,B,A,B,B
S19_1973392,,B,B,-,B,B,A,B,A,A,B,B,B,B,A,A,A,A,B,A,A,B,A,A,B,A,A,A,B,A,A,B,B,B,B,B,B,A,A,B,B,A,B,B,B,B,A,B,A,A,B,A,B,A,B,B,A,B,A,A,B,B,B,B,A,A,B,A,B,B,A,B,B,B,A,A,A,A,A,A,B,A,A,B,A,B,A,A,B,A,A,A,A,B,A,A,B,A,A,B,B,A,B,B,A,A,A,A,A,A,A,B,B,A,A,A,B,A,B,A,A,-,A,B,B,A,A,A,B,B,A,B,A,B,A,A,B,B,A,A,B,A,A,-,B,B,B,B,B,-,A,B,-,B,A,A,A,B,A,B,A,B,B,A,B,-,B,A,A,B
S19_1980838,,-,B,-,B,B,A,B,A,A,B,B,B,B,A,-,A,A,B,A,A,B,A,-,B,A,A,A,B,A,A,B,B,B,B,B,B,A,A,B,B,A,B,B,B,B,A,B,A,A,B,A,B,A,B,B,A,B,A,A,B,B,B,B,A,A,B,A,B,B,A,B,B,B,-,A,A,A,A,A,-,A,A,B,A,B,A,A,B,A,A,A,A,B,A,A,B,A,A,B,B,A,B,B,A,A,A,A,A,A,A,B,-,A,A,A,B,A,B,A,A,-,A,B,B,A,A,A,B,B,A,B,A,B,A,A,B,B,A,A,B,A,A,-,B,B,B,B,B,-,A,B,-,B,A,A,A,B,A,B,A,B,B,A,B,-,B,A,A,B
S19_2005212,,-,B,-,B,B,A,B,A,A,B,B,B,B,A,A,A,A,B,A,A,B,A,-,B,A,A,A,B,A,A,B,B,B,B,B,B,A,A,B,B,A,B,B,B,B,A,B,A,A,B,A,B,A,B,B,A,B,A,A,B,B,B,-,A,A,B,A,B,B,A,B,B,B,A,A,A,A,A,A,-,A,A,B,A,B,A,A,B,A,A,A,A,B,A,A,B,A,A,B,B,A,B,B,A,A,A,A,A,A,A,B,-,A,A,A,B,A,B,A,A,A,A,B,B,A,A,A,B,B,A,B,A,B,A,A,B,B,A,A,B,A,A,-,B,B,A,B,B,-,A,B,-,B,A,A,A,B,A,B,A,B,B,A,B,-,B,A,A,B
S19_2100364,,-,B,-,B,B,A,B,A,-,-,B,B,B,A,-,A,A,B,A,A,B,A,-,B,A,A,A,B,A,A,B,B,B,B,B,B,-,A,B,B,A,B,B,B,B,A,B,A,A,B,A,B,A,B,B,A,B,-,A,B,B,B,-,A,A,B,A,B,B,A,B,B,B,-,A,A,A,A,A,-,A,A,B,A,B,A,A,B,A,A,A,A,B,A,A,B,B,A,B,B,A,B,B,A,A,A,A,A,A,A,B,-,A,A,A,B,A,A,A,-,A,A,B,B,A,A,A,B,B,A,A,A,B,A,A,B,B,A,A,B,A,A,-,B,B,A,B,B,-,A,B,-,B,A,A,A,B,A,B,A,B,B,A,B,-,B,-,A,B
S19_2132836,,-,B,-,B,B,A,B,A,A,A,B,B,B,A,A,A,A,B,A,A,B,A,-,B,A,A,A,B,A,A,B,B,B,B,B,B,A,A,B,B,A,-,B,B,B,A,B,A,A,B,A,B,A,B,B,A,B,A,A,B,B,A,B,A,A,B,A,B,B,A,B,B,B,-,A,A,A,A,A,-,A,A,B,A,B,B,A,B,A,A,A,A,B,A,A,B,B,A,B,B,A,B,B,A,A,A,A,A,A,A,B,-,A,A,A,B,A,A,A,A,A,A,B,B,A,A,A,B,B,A,A,A,B,A,A,B,B,A,A,B,A,A,-,B,B,A,B,B,-,A,B,A,B,A,A,A,B,A,B,A,B,B,A,B,-,B,A,A,B
S19_2136314,,-,B,-,B,B,A,B,A,-,-,B,-,B,A,-,A,A,B,A,A,B,A,B,B,A,A,A,B,A,A,-,-,B,B,B,B,A,-,B,B,A,A,B,B,B,A,B,A,A,-,A,B,A,B,B,A,B,A,A,B,B,A,B,A,A,-,A,B,B,A,B,B,B,-,A,A,A,A,A,-,A,-,B,-,B,-,A,B,A,A,A,A,B,A,A,B,B,A,B,B,A,B,B,A,A,-,A,A,A,A,B,-,A,A,A,B,A,A,A,A,A,A,B,B,A,-,A,-,-,A,A,A,B,A,A,-,B,A,-,B,A,A,-,B,-,A,B,B,-,A,B,A,B,A,A,A,B,-,B,A,B,B,A,B,-,B,A,A,-
S19_2189004,,-,B,-,B,B,A,B,A,A,A,B,B,B,A,A,A,A,B,A,A,B,A,B,B,A,A,A,B,A,A,B,B,B,B,B,B,A,A,B,B,A,-,B,B,B,A,B,A,A,B,A,B,A,B,B,A,B,A,A,B,B,A,-,A,A,B,A,B,B,A,B,B,B,A,A,A,A,A,A,B,A,A,B,A,B,B,A,B,A,A,A,A,B,A,A,B,B,A,B,B,A,B,B,A,A,A,A,A,A,A,B,-,A,A,A,B,A,A,A,A,A,A,B,B,A,A,A,B,B,A,A,A,B,A,A,B,B,A,A,B,A,A,-,B,B,A,B,B,A,A,B,A,B,A,A,A,B,A,B,A,B,B,A,B,-,B,A,A,B
S19_2193015,,-,B,-,B,B,A,B,A,A,A,B,B,B,A,A,A,A,B,A,A,B,A,-,B,A,A,A,-,A,A,B,B,-,B,B,B,A,A,B,B,A,-,B,B,A,A,B,A,A,B,A,B,A,B,B,A,B,A,A,B,B,A,-,A,A,B,A,B,B,A,B,B,B,-,A,A,A,A,A,-,A,A,B,A,B,B,A,B,A,A,A,A,B,A,A,B,B,A,B,B,A,B,B,A,A,A,A,A,A,A,B,-,A,A,A,B,A,A,A,-,A,A,B,B,A,A,-,B,B,A,A,A,B,A,A,B,B,A,-,B,A,A,-,B,B,A,B,B,-,A,B,A,B,A,-,A,B,A,B,A,B,B,A,B,-,B,A,A,B
S19_2253124,,-,B,-,B,B,A,-,A,A,A,B,B,B,A,-,A,A,B,A,A,B,A,-,B,A,A,A,B,A,A,B,B,-,B,B,B,A,A,B,B,A,-,B,A,-,A,B,A,A,B,A,B,A,B,B,A,B,A,A,B,B,B,-,A,A,B,A,B,B,A,B,B,B,-,A,A,A,A,A,-,A,A,B,A,B,A,A,B,A,A,A,A,B,A,A,B,B,A,B,B,A,B,B,A,A,A,A,A,A,A,B,B,A,B,A,-,A,A,A,-,A,A,B,B,A,A,A,-,B,A,A,B,B,B,A,-,B,A,-,B,A,A,-,B,B,A,B,B,-,A,B,-,B,A,A,A,B,A,B,A,B,B,A,B,-,B,A,A,B
S19_2260531,,-,B,-,B,B,A,B,A,A,A,B,B,B,A,A,A,A,B,A,A,B,A,B,B,A,A,A,B,A,A,B,B,B,B,B,B,A,A,B,B,A,-,B,A,B,A,B,A,A,B,A,B,A,B,B,A,B,A,A,B,B,B,B,A,A,B,A,B,B,A,B,B,B,A,A,A,A,A,A,-,A,A,B,A,B,A,A,B,A,A,A,A,B,A,A,B,B,A,B,B,A,B,B,A,A,A,A,A,A,A,B,-,A,B,A,B,A,A,A,A,A,A,B,B,A,A,A,B,B,A,A,B,B,B,A,B,B,A,-,B,A,A,-,B,-,A,B,B,-,A,B,A,B,A,A,A,B,A,B,A,B,B,A,B,-,B,A,A,B
S19_2264271,,-,B,-,B,B,A,B,A,A,A,B,B,B,A,A,A,A,B,A,A,B,A,B,B,A,A,A,B,A,A,B,B,B,B,B,B,A,A,B,B,A,-,B,A,B,A,B,A,A,B,A,B,A,B,B,A,B,A,A,B,B,B,B,A,A,B,A,B,B,A,B,B,B,A,A,A,A,A,A,-,A,A,B,A,B,-,A,B,A,A,A,A,B,A,A,B,B,A,B,B,A,B,B,A,A,A,A,A,A,A,B,-,A,B,A,B,A,A,A,A,A,A,B,B,A,A,A,B,B,A,A,B,B,B,A,B,B,A,A,B,A,A,-,B,B,A,B,B,-,A,B,A,B,A,A,A,B,A,B,A,B,B,A,B,-,B,A,A,B
S19_2328306,,-,B,-,B,-,A,-,A,-,A,B,-,B,A,-,A,A,B,A,A,B,A,-,B,A,A,A,-,A,-,B,B,-,B,B,B,-,-,B,B,A,-,B,A,B,A,A,A,A,B,A,B,A,B,B,A,B,A,A,B,B,B,-,A,A,B,A,B,B,A,B,B,B,-,A,A,A,A,A,-,A,-,B,A,B,A,A,B,A,A,A,A,-,A,A,B,B,A,B,B,A,B,-,B,A,A,A,A,A,A,B,-,A,B,-,B,-,A,A,A,A,A,B,B,A,A,A,B,-,A,A,B,B,B,A,B,B,-,-,B,A,A,-,B,-,A,B,B,-,A,B,A,B,A,A,A,B,A,B,-,A,B,A,B,-,B,A,A,B
S20_35382,,-,A,-,A,B,B,B,B,A,A,B,B,A,A,B,B,A,B,B,B,A,A,-,A,A,A,B,B,B,A,A,B,B,A,A,A,A,B,A,A,B,A,B,A,A,A,B,A,B,A,A,A,B,B,B,B,A,A,B,B,B,A,B,A,A,A,A,B,B,A,A,B,B,A,B,B,A,A,A,-,B,B,A,B,B,B,B,B,B,-,B,A,A,A,A,B,B,A,B,B,B,B,A,A,A,A,B,B,A,B,A,-,A,A,A,B,B,B,B,A,A,B,B,B,A,B,A,A,B,B,A,A,B,B,A,A,B,A,A,-,-,B,-,B,B,B,B,B,-,A,B,B,A,A,B,A,B,-,B,B,B,A,A,A,-,A,A,A,B
S20_170746,,-,A,-,A,B,B,-,B,A,A,B,B,A,A,-,B,A,B,A,B,A,A,A,A,A,B,B,B,B,A,A,A,-,A,A,A,B,-,A,A,B,A,B,A,A,A,B,A,B,A,A,A,B,B,B,B,A,A,-,B,B,A,-,A,A,A,A,B,A,A,A,-,B,A,B,B,A,A,-,-,-,B,A,A,-,B,B,-,B,A,A,A,A,A,A,B,B,A,B,B,B,A,A,A,A,A,-,A,A,B,A,-,A,B,A,B,B,B,B,A,A,B,B,B,A,-,A,A,B,B,A,A,B,B,A,A,B,A,-,A,A,B,-,B,B,B,B,B,-,A,B,B,A,A,A,A,B,-,B,B,B,A,A,A,-,A,A,A,B
S20_186677,,-,A,-,A,B,B,B,B,A,A,B,B,A,A,B,B,A,B,-,B,A,A,-,A,A,B,B,B,B,A,A,A,B,A,A,A,B,B,A,A,B,A,B,A,A,A,B,A,B,A,A,A,B,B,B,B,A,A,B,B,B,A,B,A,A,A,A,B,A,A,A,B,B,A,B,B,A,A,B,A,B,B,A,A,B,B,B,B,B,-,A,A,A,A,A,B,B,A,B,B,B,A,A,A,A,A,B,A,A,B,A,A,A,B,A,B,B,B,B,A,A,B,B,B,A,B,A,A,B,B,A,A,B,B,A,A,B,A,-,-,-,B,-,B,B,B,B,B,-,A,B,B,A,A,A,A,B,-,B,B,B,A,A,A,-,A,A,A,B
S20_202557,,-,A,-,A,A,B,B,B,A,A,B,B,A,A,B,B,A,B,-,B,A,A,-,A,A,B,B,B,B,A,A,A,-,B,A,A,B,B,A,A,B,A,B,A,A,A,B,A,B,A,A,A,B,B,B,B,A,A,B,B,B,A,B,A,A,A,A,B,A,A,A,B,B,-,B,B,A,A,B,-,B,B,A,A,B,B,B,B,B,-,A,A,A,A,A,B,B,A,B,B,B,A,A,A,A,A,B,A,A,B,A,-,A,B,A,B,B,B,B,A,A,B,B,B,A,B,A,A,B,B,A,A,B,B,A,A,B,A,-,-,-,B,-,B,B,B,B,B,-,A,B,B,A,A,A,A,B,-,B,B,B,A,A,A,-,A,A,A,B
S20_211772,,-,A,-,A,A,B,B,B,A,A,B,B,A,A,B,B,A,B,-,B,A,A,-,A,A,B,B,B,B,A,A,A,B,B,A,A,B,B,A,A,B,A,B,A,A,A,B,A,B,A,A,A,B,B,B,B,A,A,B,B,B,A,B,A,A,A,-,B,A,A,A,B,B,A,B,B,A,A,B,-,B,B,A,A,B,B,B,B,B,-,A,A,A,A,A,B,B,A,B,B,B,A,A,A,A,A,B,A,A,B,A,-,A,B,A,B,B,B,B,A,A,B,B,B,A,B,A,A,B,B,A,A,B,B,A,A,B,A,A,A,-,B,-,B,B,B,B,B,-,A,B,B,A,A,A,A,B,-,B,B,B,A,A,A,-,A,A,A,B
S20_243181,,-,A,-,A,A,-,B,-,A,A,-,-,A,A,B,B,A,-,A,B,A,A,A,A,A,B,B,-,-,A,A,A,B,B,A,A,B,-,A,A,B,A,B,A,A,A,B,A,B,A,A,A,B,-,-,B,A,A,-,-,B,A,-,A,A,A,-,B,A,A,A,-,B,A,B,B,A,A,B,A,B,-,A,A,B,-,B,B,B,A,A,A,A,A,A,B,B,A,B,B,B,A,A,A,A,A,-,A,A,B,A,A,A,-,A,-,B,-,B,A,A,B,B,B,A,B,A,A,B,B,A,A,B,B,A,A,B,A,-,A,A,B,-,B,B,-,B,B,-,A,B,-,A,A,A,A,-,-,-,B,B,A,A,A,-,A,A,A,B
S20_255021,,-,A,-,A,A,B,B,-,A,A,B,B,A,A,B,B,A,B,-,B,A,A,-,A,A,B,B,B,B,A,A,A,-,B,A,A,B,B,A,A,B,A,B,A,-,A,B,A,B,A,A,A,B,B,B,B,A,A,B,B,B,A,-,A,A,A,B,B,A,A,A,B,B,-,B,B,A,A,B,A,B,B,A,A,B,B,B,B,B,A,A,A,A,A,A,B,B,A,B,B,B,A,A,A,A,A,B,A,A,B,A,-,A,B,A,B,B,B,B,A,A,B,B,B,A,B,A,A,B,B,A,A,B,B,A,A,B,A,-,A,A,B,-,B,B,B,B,B,-,A,B,B,A,A,A,A,B,B,B,B,B,A,A,A,-,A,A,A,B
S20_266772,,-,A,-,A,A,B,B,-,A,A,B,B,A,A,B,B,A,B,-,B,A,A,-,A,A,B,B,B,B,A,A,A,B,B,A,A,B,B,A,A,B,A,B,A,A,A,B,A,B,A,A,A,B,B,B,B,A,A,B,B,B,A,B,A,A,A,B,B,A,A,A,B,B,-,B,B,A,A,B,-,B,B,A,A,B,B,B,B,B,A,A,A,A,A,A,B,B,A,B,B,B,A,A,A,A,A,B,A,A,B,A,-,A,B,A,B,B,B,B,A,A,B,B,B,A,B,A,A,B,B,A,A,B,B,A,A,B,A,A,A,-,B,-,B,B,B,B,B,-,A,B,B,A,A,A,A,B,-,B,B,B,A,A,A,-,A,A,A,B
S20_271762,,-,A,-,A,A,B,B,-,A,A,B,B,A,A,B,B,A,B,A,B,A,A,A,A,A,B,B,B,B,A,A,A,B,B,A,A,B,B,A,A,B,A,B,A,A,A,B,A,B,A,A,A,B,B,B,B,A,A,B,B,B,A,B,A,A,A,B,B,A,A,A,B,B,-,B,B,A,A,B,-,B,B,A,A,B,B,B,B,B,-,A,A,A,A,A,B,B,A,B,B,B,A,A,A,A,A,B,A,A,B,A,A,A,B,A,B,B,B,B,A,A,B,B,B,A,B,A,A,B,B,A,A,B,B,A,A,B,A,A,-,A,B,-,B,B,B,B,B,-,B,B,B,A,A,A,A,B,-,B,B,B,A,A,A,-,A,A,A,B
S20_294192,,A,A,-,A,A,B,B,-,A,A,B,B,A,A,B,B,A,B,A,B,A,A,A,A,A,B,B,B,B,A,A,A,B,B,A,A,B,B,A,A,B,A,B,A,A,A,B,A,B,A,A,A,B,B,B,B,A,A,B,B,B,A,B,A,A,A,B,B,A,A,A,B,B,A,B,B,A,A,B,A,B,B,A,A,B,B,B,B,B,-,A,A,A,A,A,B,B,A,B,B,B,A,A,A,A,A,B,A,A,B,A,-,A,B,A,B,B,B,B,A,A,B,B,B,A,B,A,A,B,B,A,A,B,B,A,A,B,A,A,A,-,B,-,B,B,B,B,B,-,B,B,B,A,A,A,A,B,-,B,B,B,A,A,A,-,A,A,A,B
S20_360099,,-,A,-,A,A,B,B,-,A,A,B,B,A,A,B,B,A,B,-,B,A,A,-,A,A,B,B,B,B,A,A,A,B,B,A,A,B,-,A,A,B,A,B,A,A,A,B,A,B,A,A,A,B,B,B,B,A,A,B,B,B,A,-,A,A,A,B,B,A,A,A,B,B,-,B,B,A,A,B,A,B,B,A,A,B,A,B,B,B,A,A,A,A,A,A,B,B,A,B,B,B,A,A,A,A,A,B,A,A,B,A,A,A,B,A,B,B,B,B,A,A,B,B,B,A,B,A,A,B,B,A,A,B,B,A,A,B,A,-,A,-,B,-,B,B,B,B,B,-,B,B,B,A,A,A,A,B,A,B,B,B,A,A,A,-,A,A,A,B
S20_365238,,-,A,-,A,A,B,B,A,A,A,B,B,A,A,B,B,A,B,-,B,A,A,-,A,A,B,B,B,B,A,A,A,B,B,A,A,B,B,A,A,B,A,B,A,A,A,B,A,B,A,A,A,B,B,B,B,A,A,B,B,B,A,-,A,A,A,B,B,A,A,A,B,B,-,B,B,A,A,B,A,B,B,A,A,B,A,B,B,B,-,A,A,A,A,A,B,B,A,B,B,B,A,A,A,A,A,B,A,A,B,A,A,A,B,A,B,B,B,B,A,A,B,B,B,A,B,A,A,B,B,A,A,B,B,A,A,B,A,-,-,A,B,-,B,B,B,B,B,-,B,B,B,A,A,A,A,B,-,B,B,B,A,A,A,A,A,A,A,B
S20_374698,,-,A,-,A,A,B,B,-,A,-,B,-,A,A,B,B,A,B,-,B,A,A,-,A,A,B,B,B,B,A,A,A,B,B,A,-,B,-,A,A,B,A,B,A,-,A,B,A,B,A,A,A,B,B,B,B,A,A,B,B,B,A,-,A,A,A,B,B,A,A,A,B,B,-,B,B,A,A,B,-,B,B,A,A,B,A,B,B,B,A,-,A,A,A,A,B,B,A,B,B,B,A,A,A,A,A,B,A,A,B,A,-,A,B,A,B,B,B,B,A,A,B,B,B,A,B,A,A,B,B,A,A,B,B,A,A,B,A,A,-,-,B,-,B,B,B,B,B,-,B,B,B,A,A,A,A,B,-,B,B,B,A,A,A,-,A,A,A,B
S20_428885,,-,A,-,A,A,A,B,-,A,A,B,A,A,A,B,B,A,B,-,B,A,A,-,A,A,B,B,B,B,A,A,A,B,B,A,A,B,B,A,A,B,A,B,A,A,A,B,A,B,A,A,A,B,B,B,B,A,A,B,B,B,A,A,A,A,A,B,B,A,A,A,B,B,A,B,B,A,A,B,A,B,B,A,A,B,A,B,B,B,A,A,A,A,A,A,B,B,A,B,B,B,A,A,A,A,A,B,A,A,B,A,A,A,B,A,B,B,B,B,A,A,B,B,B,A,B,A,A,B,B,A,A,B,B,A,A,B,A,A,B,-,B,-,B,B,B,B,B,-,B,B,B,A,A,A,A,B,-,B,B,B,A,A,A,-,A,A,A,B
S20_438278,,-,A,-,A,A,A,B,-,A,A,B,A,A,A,B,B,A,B,A,B,A,A,A,A,A,B,B,B,B,A,A,A,B,B,A,A,B,B,A,A,B,A,B,A,A,A,B,A,A,A,A,A,B,B,B,B,A,A,B,B,B,A,-,A,A,A,B,B,A,A,A,B,B,-,B,B,A,A,B,-,B,B,A,A,B,A,B,B,B,-,A,A,A,A,A,B,B,A,B,B,B,A,A,A,A,A,B,A,A,B,A,-,A,B,A,-,B,B,B,A,A,B,B,B,A,B,A,A,B,B,A,A,B,B,A,A,B,A,-,B,-,B,-,B,-,B,B,B,-,B,B,B,A,A,A,A,B,-,B,B,B,A,A,A,-,A,A,A,B
S20_459458,,-,A,-,A,A,A,B,-,A,A,B,A,A,A,B,B,A,B,-,B,A,A,A,A,A,B,B,B,B,A,A,A,B,B,A,A,B,B,A,A,B,A,B,A,A,A,B,A,B,A,A,A,B,B,B,B,A,A,B,B,B,A,-,A,A,A,B,B,A,A,A,B,B,A,B,B,A,A,B,A,B,B,A,A,B,A,B,B,B,A,A,A,A,A,A,B,B,A,B,B,B,A,A,A,A,A,B,A,A,B,A,-,A,B,A,B,B,B,B,A,A,B,B,B,A,B,A,A,B,B,A,A,B,B,A,A,B,A,A,B,-,B,-,B,B,B,B,B,-,B,B,B,A,A,A,A,B,-,B,B,B,A,A,A,-,A,A,A,B
S20_468365,,-,A,-,A,A,A,B,-,A,A,B,A,A,A,B,B,A,B,-,B,A,A,-,A,A,B,B,B,B,A,A,A,B,B,A,A,B,B,A,A,B,A,B,A,A,A,B,A,B,A,A,A,B,B,B,B,A,A,B,B,B,A,A,A,A,A,B,B,A,A,A,B,B,-,B,B,A,A,B,-,B,B,A,A,B,A,B,B,B,A,A,A,A,A,A,B,B,A,B,B,B,A,A,A,A,A,B,A,A,B,A,-,A,B,A,B,B,B,B,A,A,B,B,B,A,B,A,A,B,B,A,A,B,B,A,A,B,A,-,B,-,B,-,B,B,B,B,B,B,B,B,B,A,A,A,A,B,-,B,B,B,A,A,A,-,A,A,A,B
S20_490331,,-,A,-,A,A,A,B,-,A,A,B,-,A,A,B,B,A,B,A,B,A,A,-,A,A,B,B,B,B,A,A,A,B,B,A,A,B,-,A,A,B,A,B,A,A,A,B,A,B,A,A,A,B,B,B,B,A,A,B,B,-,A,-,A,A,A,B,B,A,A,A,B,B,-,B,B,A,A,B,-,B,B,A,A,B,A,B,B,B,-,A,A,A,A,A,B,B,A,B,B,B,A,A,A,A,A,B,A,A,B,A,-,A,B,A,B,B,B,B,-,A,B,B,B,A,B,A,A,-,B,A,A,B,B,A,-,B,A,-,B,A,B,-,B,B,B,B,B,-,B,B,-,A,A,A,A,B,-,B,B,B,A,A,A,-,A,A,A,B
S20_510385,,-,A,-,A,A,A,B,-,A,A,B,A,A,A,B,B,A,B,-,B,A,A,A,A,A,B,B,B,B,A,A,A,B,B,A,A,B,B,A,A,B,A,B,A,A,A,B,A,B,A,A,A,B,B,B,B,A,A,B,B,B,A,A,A,A,A,B,B,A,A,A,B,B,A,B,B,A,A,B,-,B,B,A,A,B,A,B,B,B,-,A,A,A,A,A,B,B,A,B,B,B,A,A,A,A,A,B,A,A,B,A,A,A,B,A,B,B,B,B,A,A,B,B,B,A,B,A,A,B,B,A,A,B,B,A,A,B,A,A,B,A,B,-,B,B,B,B,B,-,B,B,B,A,A,A,A,B,-,B,B,B,A,A,A,-,A,A,A,B
S20_554980,,-,A,-,A,A,A,B,A,A,-,B,A,A,A,-,B,A,B,-,B,A,A,-,A,A,-,B,-,B,A,A,A,B,B,A,A,B,-,A,A,B,A,B,A,A,A,B,A,B,A,A,A,B,B,B,B,A,-,B,B,B,A,-,A,A,A,B,B,A,A,A,B,B,-,B,B,A,A,B,-,B,B,A,A,B,-,B,B,B,-,A,A,A,A,A,B,B,A,B,B,B,A,A,A,A,A,B,A,A,B,A,-,A,B,A,B,B,B,B,A,A,B,B,B,A,B,A,A,-,B,A,A,B,B,A,A,B,A,-,B,-,B,-,B,B,B,B,B,-,B,B,B,A,A,-,A,B,-,B,B,B,A,A,A,-,A,A,A,-
S20_558474,,A,A,-,A,A,A,-,-,A,A,B,-,A,A,B,B,A,B,-,B,A,A,-,A,A,B,B,B,B,A,A,-,B,B,A,A,B,-,A,A,B,A,B,A,A,A,B,A,B,A,A,A,B,B,B,B,A,A,B,B,B,A,A,A,A,A,B,B,A,A,A,B,B,A,B,B,A,A,B,-,B,B,A,A,B,A,B,B,B,A,A,A,A,A,A,B,B,A,B,B,B,A,A,A,A,A,B,A,A,B,A,-,A,B,A,B,B,B,B,A,A,B,B,B,A,B,A,A,B,B,A,A,B,B,A,-,B,A,-,B,-,B,-,B,B,B,B,B,-,B,B,B,A,A,A,A,B,-,B,B,B,A,A,A,-,A,A,A,B
S21_44750,,-,B,-,B,B,A,B,B,A,A,B,B,B,A,A,A,A,B,A,A,B,B,-,B,A,A,A,B,A,A,B,A,B,B,B,B,A,A,B,B,A,-,B,A,A,A,A,A,A,B,A,B,A,B,B,A,B,A,A,B,B,B,-,A,A,B,A,B,B,A,B,A,B,-,A,A,A,A,A,-,A,A,B,A,B,-,A,B,A,A,A,A,B,A,A,B,B,A,B,B,A,B,-,B,A,A,A,A,A,A,B,-,A,B,A,B,A,A,A,A,A,A,B,B,A,A,A,B,B,A,A,B,B,B,A,B,B,A,A,B,A,A,-,B,B,A,B,B,-,A,B,A,B,A,A,A,B,A,B,A,A,B,A,B,-,B,A,A,B
S21_171654,,-,B,-,B,B,A,B,B,B,A,B,B,B,A,A,A,A,B,A,A,B,B,B,B,A,A,A,B,A,A,B,A,B,B,B,B,A,A,B,B,A,B,B,A,A,A,A,A,A,B,A,B,A,B,B,A,B,A,A,B,B,B,A,A,A,B,A,B,B,A,B,A,B,-,A,A,A,A,A,-,A,A,B,A,B,A,A,B,A,A,A,A,B,A,A,B,B,A,B,B,A,B,-,B,A,A,A,A,A,A,B,-,A,B,A,B,A,A,A,-,A,A,B,B,A,A,A,B,B,A,A,B,B,B,A,B,B,A,-,B,A,B,-,B,-,A,B,A,-,A,B,A,B,A,A,A,B,A,B,A,A,B,A,B,-,B,A,A,B
S21_179539,,-,B,-,B,B,A,B,B,B,A,B,B,B,A,A,A,A,B,A,A,B,B,B,B,A,A,A,B,A,A,B,A,B,B,B,B,A,A,B,B,A,B,B,A,A,A,A,A,A,B,A,B,A,B,B,A,B,A,A,B,B,B,-,A,A,B,A,B,B,A,B,A,B,A,A,A,A,A,A,-,A,A,B,A,B,A,A,B,A,A,A,A,B,A,A,B,B,A,B,B,A,B,-,B,A,A,A,A,A,A,B,-,A,B,A,B,A,A,A,-,A,A,B,B,A,A,A,B,B,A,A,B,B,B,A,-,B,A,-,B,A,B,-,B,-,A,B,A,-,A,B,A,B,A,A,A,B,A,B,A,A,B,A,B,-,B,A,A,B
S21_224412,,B,B,-,B,B,A,B,B,B,B,B,B,B,A,A,A,A,B,A,A,B,B,-,B,A,A,A,B,B,A,B,A,B,B,B,B,A,B,B,B,A,B,B,A,A,A,A,A,A,B,B,B,A,B,B,A,B,A,A,B,B,B,A,A,A,B,A,B,B,A,B,A,B,-,A,A,A,A,A,B,A,A,B,A,B,A,A,B,A,A,A,A,B,A,A,B,B,A,B,B,A,B,-,B,A,A,A,A,A,A,B,-,B,B,A,B,A,A,A,A,A,A,B,B,A,A,B,B,B,A,A,A,B,B,A,B,B,A,A,B,A,B,-,B,B,A,B,A,-,A,B,A,A,A,A,A,B,A,B,A,A,B,A,B,-,B,A,A,B
S21_226068,,-,B,-,B,B,A,B,B,B,B,B,B,B,A,A,A,A,B,A,A,B,B,-,B,A,A,A,B,B,A,B,A,B,B,B,B,A,B,B,B,A,B,B,A,A,A,A,A,A,B,B,B,A,B,B,A,B,A,A,B,B,B,A,A,A,B,A,B,B,A,B,A,B,A,A,A,A,A,A,B,A,A,B,A,B,A,A,B,A,B,A,A,B,A,A,B,B,A,B,B,A,B,-,B,A,A,A,A,A,A,B,-,B,B,A,B,A,A,A,A,A,A,B,B,A,A,B,B,B,A,A,A,B,B,A,B,B,A,-,B,A,B,-,B,B,A,B,A,-,A,B,A,A,A,A,A,B,A,B,A,A,B,A,B,-,B,A,A,B
S21_286547,,-,B,-,B,B,A,A,B,B,B,B,B,B,A,A,A,A,B,A,A,B,B,-,B,A,A,A,B,A,A,B,B,B,B,B,B,A,B,B,B,A,B,B,A,A,A,A,A,A,B,B,B,A,B,B,A,B,A,A,B,B,B,A,A,A,B,A,B,B,A,B,A,B,-,A,A,A,A,A,-,A,A,B,A,B,A,A,B,A,B,A,A,B,A,A,B,B,A,B,B,A,B,-,B,A,A,A,A,A,A,B,B,A,B,A,B,A,A,A,A,B,A,A,B,A,A,B,B,B,A,A,A,B,B,A,B,B,A,B,B,A,A,-,B,B,A,B,B,-,A,B,A,A,A,A,A,B,A,B,A,A,B,A,B,-,B,A,A,B
S21_294079,,-,B,-,B,B,A,A,B,B,B,B,B,B,A,A,A,A,B,A,A,B,B,B,B,A,A,A,B,A,A,B,B,B,B,B,B,A,B,B,B,A,B,B,A,A,A,A,A,A,B,B,B,A,B,B,A,B,A,A,B,B,B,A,A,A,B,A,B,B,A,B,A,B,-,A,A,A,A,A,B,A,A,B,A,B,A,A,B,A,B,A,A,B,A,A,B,B,A,B,B,A,B,-,B,A,A,A,A,A,A,B,-,A,B,A,B,A,A,A,A,B,A,A,B,A,A,B,B,B,A,A,A,B,B,A,-,B,A,B,B,A,A,-,B,B,A,B,B,-,A,B,A,A,A,A,A,B,A,B,A,A,B,A,B,-,B,A,A,B
S21_302093,,-,-,-,B,B,A,-,B,-,-,B,-,B,A,A,A,A,B,-,A,B,B,-,B,A,A,A,-,A,A,B,B,B,B,B,B,A,B,B,B,A,B,B,A,A,A,A,A,A,B,B,B,A,B,B,A,B,A,A,B,B,B,-,-,A,-,A,B,B,A,B,A,B,-,A,A,A,A,A,-,A,-,B,A,B,A,-,B,A,B,A,A,B,A,A,B,B,A,B,B,A,B,A,B,A,A,A,A,-,A,B,-,A,B,A,B,A,A,-,-,B,A,A,B,A,A,B,B,-,A,A,A,B,B,A,B,B,-,-,B,A,A,-,B,-,A,B,B,-,A,B,-,A,A,A,A,B,A,B,A,A,B,A,B,-,B,A,A,B
S21_325222,,-,B,-,B,B,A,A,B,B,B,B,B,B,A,A,A,A,B,A,A,B,B,-,B,A,-,A,-,A,A,B,-,B,B,B,B,A,-,B,B,A,B,B,A,A,A,-,A,A,-,B,-,A,-,B,-,-,-,A,B,B,B,-,A,-,B,-,B,B,A,B,A,B,A,A,A,A,A,A,-,A,A,B,A,B,A,A,B,A,B,A,A,B,A,A,B,B,-,B,B,A,B,B,B,A,A,A,A,A,A,B,-,A,B,A,-,A,A,A,A,B,A,A,B,A,-,B,B,B,A,A,A,B,B,-,B,B,-,-,B,A,B,-,B,B,A,B,B,-,A,B,A,A,-,A,-,B,-,B,A,A,B,A,B,-,B,A,A,B
S21_342597,,-,B,-,B,B,A,-,B,A,B,B,-,B,A,-,A,A,B,A,A,B,B,-,B,A,A,A,B,A,A,B,B,B,B,B,B,A,B,B,B,A,B,B,A,-,A,A,A,A,B,-,B,A,-,B,A,B,A,A,B,B,B,A,A,A,B,A,B,B,A,B,A,B,-,A,A,A,A,A,-,A,A,B,A,B,A,A,B,A,B,-,A,B,A,A,B,B,A,B,B,A,B,-,B,A,A,A,A,A,A,B,-,A,B,A,B,A,A,A,A,B,A,A,B,A,A,B,B,B,A,A,A,B,B,A,B,B,A,-,B,A,B,-,B,B,A,B,B,-,A,B,-,A,A,A,A,B,A,B,A,A,B,A,B,-,B,A,A,B
S21_378022,,B,B,-,B,B,A,A,B,A,B,B,B,B,A,A,A,A,B,A,A,B,B,-,B,A,A,A,B,A,A,B,B,B,B,B,B,A,B,B,B,A,A,B,A,A,A,A,A,A,B,B,B,A,B,B,A,B,A,A,B,B,B,A,A,A,B,A,B,B,A,B,A,B,A,A,A,A,A,A,B,A,A,B,A,B,A,A,B,A,B,A,A,B,A,A,B,B,A,B,B,B,B,-,B,A,A,A,A,A,A,B,-,A,B,A,B,A,A,B,A,B,A,A,B,A,A,B,B,B,A,A,A,B,B,A,B,B,A,B,B,A,B,-,B,B,A,B,B,-,A,B,A,A,A,A,A,B,A,B,A,A,B,A,B,-,B,A,A,B
S21_380115,,-,B,-,B,B,A,A,B,A,B,B,-,B,A,A,A,A,B,A,A,B,B,-,B,A,A,A,B,A,A,B,B,B,B,B,B,A,B,B,B,A,A,B,A,A,A,A,A,A,B,B,B,A,B,B,A,B,A,A,B,B,B,A,A,A,B,A,B,B,A,B,A,A,-,A,A,A,A,A,-,A,A,B,A,B,A,A,B,A,B,A,A,B,A,A,B,B,A,B,B,B,B,-,B,A,A,A,A,A,A,B,-,A,B,A,B,A,A,B,A,B,A,A,B,A,A,B,B,B,A,A,A,B,B,A,B,B,A,-,B,A,B,-,B,B,A,B,B,-,A,B,A,A,A,A,A,B,A,B,A,A,B,A,B,-,B,A,A,B
S21_426767,,-,B,-,B,-,A,A,B,A,B,B,B,B,A,A,A,A,B,A,A,B,B,-,B,A,A,A,B,A,A,B,B,B,B,B,B,A,B,B,B,A,A,B,A,A,A,A,A,A,B,B,B,A,B,B,A,B,A,A,B,B,B,A,A,A,B,A,B,B,A,B,A,A,-,A,A,A,A,A,-,A,A,B,A,B,A,A,B,A,B,A,A,B,A,A,B,B,A,B,B,B,B,-,B,A,A,A,A,-,A,B,-,A,B,A,B,A,A,B,A,B,A,A,B,A,A,B,B,B,A,A,A,B,B,A,B,B,A,B,B,A,B,-,B,B,A,B,B,-,A,B,A,A,A,A,A,B,A,B,A,A,B,A,B,-,B,A,A,B
S21_480806,,-,B,-,B,B,A,A,B,A,B,B,-,B,A,-,A,-,B,A,A,B,B,B,A,A,A,A,B,A,A,B,B,B,B,B,B,A,-,B,B,A,A,B,A,A,A,A,A,A,B,B,B,A,B,B,A,-,A,-,B,B,B,-,A,A,B,A,B,B,A,B,A,A,-,A,A,A,A,A,-,A,A,B,A,B,-,A,B,A,B,-,A,B,A,-,B,-,A,B,B,B,B,B,B,A,A,A,-,A,A,B,-,A,B,A,B,A,A,B,-,B,A,A,B,A,A,B,B,B,A,A,A,B,B,A,-,B,A,-,B,-,B,-,B,B,A,B,B,-,A,B,A,A,A,A,A,B,-,B,A,A,B,A,B,-,B,A,A,B
S21_487582,,-,B,-,B,B,A,A,B,A,B,B,B,B,A,A,A,A,B,A,A,B,B,-,A,A,A,A,B,A,A,B,B,B,B,B,B,A,B,B,B,A,A,B,A,A,A,A,A,A,B,B,B,A,B,B,A,B,A,A,B,B,B,A,A,A,B,A,B,B,A,B,A,A,A,A,A,A,A,A,-,A,A,B,A,B,A,A,B,A,B,A,A,B,A,A,B,B,A,B,B,B,B,-,B,A,A,A,A,A,A,B,-,A,B,A,-,A,A,B,A,B,A,A,B,A,A,B,B,B,A,A,A,B,B,A,B,B,A,B,B,-,B,-,B,B,A,B,B,-,A,B,A,A,A,A,A,B,A,B,A,A,B,A,B,-,B,A,A,B
S21_523413,,-,B,-,B,B,A,A,B,A,B,B,B,B,A,A,A,A,B,A,A,B,B,B,A,A,A,A,B,A,A,B,B,B,B,B,B,A,B,B,B,A,A,B,A,A,B,A,A,A,B,B,B,A,B,B,A,A,A,A,B,B,A,A,A,A,B,A,B,B,A,B,A,A,-,A,A,A,A,A,-,A,A,B,A,B,A,A,B,A,B,A,A,B,A,A,B,B,A,B,B,B,B,-,B,A,A,A,A,A,A,B,B,A,B,A,B,A,A,B,A,B,A,A,B,A,A,B,B,B,A,A,A,B,B,A,B,B,A,B,B,-,B,-,B,-,A,B,B,-,A,B,A,A,A,A,A,B,A,B,A,A,B,A,B,-,B,A,A,B
S21_540433,,-,B,-,B,-,A,A,B,-,-,B,B,B,A,A,A,A,B,A,A,B,B,-,A,A,A,A,B,A,A,B,B,-,B,B,B,A,B,B,B,A,A,B,A,-,A,A,A,A,B,B,B,A,B,B,A,A,A,A,B,B,A,-,B,A,B,A,B,B,B,-,A,A,-,A,A,A,A,A,-,A,A,B,A,B,A,A,B,A,B,A,A,B,A,A,B,B,-,B,B,B,B,-,B,A,A,A,A,A,A,B,-,A,B,A,B,A,A,B,A,B,A,A,B,A,A,B,B,B,A,A,A,B,B,A,B,B,A,B,B,-,B,-,B,B,A,B,B,-,A,B,A,A,A,A,A,B,A,B,A,A,B,A,B,-,B,A,A,-
S21_582472,,-,B,-,B,B,A,A,B,A,B,B,B,B,A,A,A,A,B,A,A,B,B,B,A,A,A,A,B,A,A,B,B,B,B,B,B,A,B,B,B,A,A,B,A,A,A,A,A,A,B,B,B,A,B,B,A,A,A,A,B,B,A,A,B,A,B,A,B,B,B,B,A,A,A,A,A,A,A,A,-,A,A,B,A,B,A,A,B,A,B,A,A,B,A,A,B,B,-,B,B,B,B,-,B,A,A,A,A,A,A,B,B,A,B,A,B,A,A,B,A,B,A,A,B,A,A,B,B,B,A,A,A,B,B,A,B,B,A,B,B,-,B,-,B,B,A,B,B,-,A,B,A,A,A,A,A,B,A,B,A,A,B,A,B,-,B,A,A,B
S21_616177,,-,B,-,B,-,A,-,B,A,B,B,-,B,A,-,A,A,B,A,A,B,B,B,A,A,A,A,B,A,A,B,B,-,B,B,B,A,B,B,B,A,A,B,A,A,-,A,A,A,B,B,B,A,A,B,A,A,A,A,B,-,A,A,B,A,B,A,B,B,B,B,A,A,-,A,A,A,A,A,-,A,A,B,-,B,A,A,-,-,B,-,A,B,A,A,B,B,-,B,B,B,B,-,B,A,A,A,A,A,A,B,-,A,B,A,B,A,A,-,A,B,A,A,B,A,A,B,B,B,A,A,A,B,B,A,-,B,A,B,B,B,B,-,B,B,A,B,B,-,A,B,A,A,A,A,A,B,-,B,A,A,B,A,B,-,B,A,A,B
S21_617976,,-,B,-,B,B,A,A,B,A,B,B,B,B,A,A,A,A,B,A,A,B,B,-,A,A,A,A,B,A,A,B,B,B,B,B,B,A,-,B,B,A,A,B,A,A,A,A,A,A,B,B,B,A,A,B,A,A,A,A,B,B,A,-,B,A,B,A,B,B,B,B,A,A,A,A,A,A,A,A,-,A,A,B,A,B,A,A,B,A,B,A,A,B,A,A,B,B,-,B,B,B,B,B,B,A,A,A,A,A,A,B,-,A,B,A,B,A,A,B,-,B,A,A,B,A,A,B,B,B,A,A,A,B,B,A,-,B,A,-,B,-,B,-,B,B,A,B,B,-,A,B,-,A,A,A,A,B,-,B,A,A,B,A,B,-,B,A,A,B
S21_651578,,-,B,-,B,B,A,A,B,A,B,B,B,B,A,A,A,A,B,A,A,B,B,-,A,A,A,A,B,A,A,B,B,B,A,B,B,A,B,B,B,A,A,B,A,A,A,A,A,A,B,B,B,A,A,B,A,A,A,A,B,B,A,A,B,A,B,A,B,B,B,B,A,A,-,A,A,A,A,A,B,A,A,B,A,B,A,A,B,A,B,A,A,B,A,A,B,B,-,B,B,B,B,-,B,A,A,A,A,A,A,B,-,A,B,A,B,A,A,B,A,B,A,A,B,A,A,B,B,B,A,A,A,B,B,A,B,B,A,-,B,-,B,-,B,B,A,B,B,-,A,A,A,A,A,A,A,B,A,B,A,A,B,A,B,-,B,A,A,B
S21_662949,,B,B,-,B,B,A,A,B,A,B,B,B,B,A,A,A,A,B,A,A,B,B,B,A,A,A,A,B,A,A,B,B,B,A,B,B,A,B,B,B,A,A,B,A,A,A,A,A,A,B,B,B,A,A,B,A,A,A,A,B,B,A,A,B,A,B,A,B,B,B,B,A,A,A,A,A,A,A,A,-,A,A,B,A,B,A,A,B,A,B,A,A,B,A,A,B,B,-,B,B,B,B,-,B,A,A,A,A,A,A,B,-,A,B,A,B,A,A,B,A,B,A,A,B,A,A,B,B,B,A,A,A,B,B,A,B,B,A,B,B,-,B,-,B,B,A,B,B,-,A,A,A,A,A,A,A,B,A,B,A,A,B,A,B,-,B,A,A,B
S21_664861,,-,B,-,B,B,A,-,B,-,-,B,B,B,A,A,A,A,B,-,A,B,B,-,A,B,A,A,-,A,A,B,B,B,A,B,B,A,-,B,-,A,A,-,A,-,A,A,A,A,B,B,B,A,-,B,A,A,A,A,B,B,A,-,B,A,B,A,B,B,-,-,A,A,-,A,A,A,A,A,-,A,A,B,A,-,A,A,B,A,B,A,B,B,A,A,B,B,A,B,B,-,B,B,B,A,A,A,A,A,A,B,B,A,B,A,-,A,A,B,A,B,A,A,B,A,-,B,B,B,A,A,A,B,B,A,-,B,A,-,B,-,B,-,B,-,A,B,B,-,A,A,-,A,A,A,A,B,A,B,A,A,B,A,B,-,B,A,A,-
S21_726381,,B,B,-,B,B,A,A,B,A,B,B,B,B,A,A,A,A,B,A,A,B,B,B,A,B,A,A,B,A,A,B,B,B,A,B,B,A,B,B,B,A,B,B,A,A,A,A,A,A,B,B,B,A,A,B,A,A,A,A,B,B,A,A,B,A,B,A,A,B,B,B,A,A,B,A,A,A,A,A,B,A,A,B,A,B,A,A,B,A,B,A,B,B,A,A,B,B,-,B,B,B,B,B,B,A,A,A,A,A,A,B,-,A,B,A,B,A,A,B,A,B,A,A,B,A,A,B,B,B,A,A,A,B,B,A,B,B,A,B,B,-,B,-,B,B,A,B,A,-,A,A,A,A,A,A,A,B,A,B,A,A,B,A,B,-,B,A,A,B
S21_732512,,-,B,-,B,B,A,A,B,A,B,B,B,B,A,A,A,A,B,A,A,B,B,-,A,B,A,A,B,A,A,B,B,B,A,B,B,-,B,B,B,A,B,B,A,A,A,A,A,A,B,B,B,A,A,B,A,A,A,A,B,B,A,-,B,A,B,A,A,B,B,B,A,A,-,A,A,A,A,A,-,A,A,B,A,B,A,A,B,A,B,A,B,B,A,A,B,B,-,B,B,B,B,B,B,A,A,A,A,A,A,B,-,A,B,A,B,A,A,B,A,B,A,A,B,A,A,B,B,B,A,A,A,B,B,A,A,B,A,B,B,-,B,-,B,-,A,B,A,-,A,A,A,A,A,A,A,B,A,B,A,A,B,A,B,-,B,A,A,B
S21_764594,,-,B,-,B,B,A,-,B,A,B,B,B,B,A,-,A,A,A,A,A,B,B,-,A,B,A,A,-,A,A,B,B,-,A,B,B,-,-,B,B,A,B,B,A,-,A,A,A,A,-,B,B,A,A,B,A,A,-,-,B,B,A,-,B,A,B,A,-,B,B,B,A,A,-,-,A,A,A,A,-,A,A,B,A,B,A,A,B,A,B,-,-,B,A,A,B,B,A,B,B,-,B,B,B,A,A,A,A,A,A,B,-,A,B,A,-,A,A,B,A,B,A,A,B,A,A,B,B,B,A,A,A,B,B,A,A,B,A,-,B,-,B,-,B,B,A,B,A,-,A,A,A,A,A,A,A,B,A,B,A,A,B,A,B,-,B,A,A,B
S21_771563,,B,B,-,B,B,A,A,B,A,B,B,B,B,A,A,A,A,A,A,A,B,B,-,A,B,A,A,B,A,A,B,B,B,A,B,B,-,B,B,B,A,B,B,A,A,A,A,A,A,B,B,B,A,A,B,A,A,A,A,B,B,A,A,B,A,B,A,A,B,B,B,A,A,-,A,A,A,A,A,B,A,A,B,A,B,A,A,B,A,B,A,B,B,A,A,B,B,-,B,B,B,B,B,B,A,A,A,A,A,A,B,-,A,B,A,B,A,A,B,A,B,A,A,B,A,A,B,B,B,A,A,A,B,B,A,A,B,A,B,B,-,B,-,B,B,A,B,A,-,A,A,A,A,A,A,A,B,A,B,A,A,B,A,B,-,B,A,A,B
S21_777059,,B,B,-,B,B,A,A,B,A,B,B,B,B,A,A,A,A,A,A,A,B,B,-,A,B,A,A,B,A,A,B,B,B,A,B,B,A,B,B,B,A,B,B,A,A,A,A,A,A,B,B,B,A,A,B,A,A,A,A,B,B,A,A,B,A,B,A,A,B,B,B,A,A,A,A,A,A,A,A,-,A,A,B,A,B,A,A,B,A,B,A,B,B,A,A,B,B,-,B,B,B,B,B,B,A,A,A,A,A,A,B,-,A,B,A,B,A,A,B,A,B,A,A,B,A,A,B,B,B,A,A,A,B,B,A,A,B,A,B,B,-,B,-,B,-,A,B,A,-,A,A,A,A,A,A,A,B,A,B,A,A,B,A,B,-,B,A,A,B
S21_817076,,-,B,-,B,B,B,A,B,A,B,B,B,B,A,A,A,A,A,A,A,B,B,-,A,B,A,A,B,B,A,B,B,B,A,B,B,-,B,B,B,A,B,B,A,B,A,A,A,A,B,B,B,A,A,B,A,A,A,A,B,B,A,-,B,A,-,A,A,B,B,B,A,A,-,A,A,A,A,A,-,A,A,B,A,B,-,A,B,A,B,A,B,B,A,A,B,B,-,B,B,B,B,B,B,A,A,A,A,A,A,B,-,A,B,A,B,A,A,B,A,B,A,A,B,A,A,B,B,B,A,A,A,B,-,A,A,B,A,B,B,-,B,-,B,B,A,B,A,-,A,A,A,A,A,A,A,B,A,B,A,A,B,A,B,-,B,A,A,B
S21_824993,,B,B,-,B,B,B,A,B,-,B,B,B,B,A,A,A,A,A,A,A,B,B,B,A,B,A,A,B,B,A,B,B,B,A,B,B,A,B,B,B,A,B,B,A,B,A,A,A,A,B,B,B,A,A,B,A,A,A,A,B,B,A,A,B,A,B,A,A,B,B,B,A,A,-,A,A,A,A,A,-,A,A,B,A,B,A,A,B,A,B,A,B,B,A,A,B,B,-,B,B,B,B,B,B,A,A,A,A,A,A,B,-,A,B,A,B,A,A,B,A,B,A,A,B,A,A,B,B,B,A,A,A,B,B,A,A,B,A,-,B,-,B,-,B,B,A,B,A,-,A,A,A,A,A,A,A,B,A,B,A,A,B,A,B,-,B,A,A,B
S21_872361,,-,B,-,B,B,B,A,B,-,B,B,B,B,A,A,A,A,A,A,A,B,B,-,A,B,A,A,B,B,A,B,B,B,A,B,B,-,B,B,B,A,B,B,A,B,A,A,A,A,B,B,B,A,A,B,A,A,A,A,B,B,A,A,B,B,B,A,A,B,B,B,A,A,-,A,A,A,A,A,-,A,A,B,A,B,A,A,B,A,B,A,B,B,A,A,B,B,-,B,B,B,B,B,B,A,A,A,A,A,A,B,B,A,B,A,B,A,A,B,A,B,A,A,B,A,B,B,B,B,A,A,A,B,B,A,A,B,A,B,B,-,B,B,A,-,A,B,A,-,A,A,A,A,A,A,A,B,A,B,A,A,B,A,B,-,B,A,A,B
S21_892371,,B,B,B,B,B,B,A,B,-,B,B,B,B,A,-,A,A,A,A,A,B,B,B,A,B,A,-,B,B,A,B,B,A,A,B,B,B,B,B,B,A,B,B,A,B,A,A,A,A,B,B,B,A,A,B,A,A,A,A,B,B,A,-,B,B,B,A,A,B,B,B,A,A,-,-,A,A,A,A,-,A,A,B,-,B,A,A,B,-,B,A,B,B,A,A,B,B,B,B,B,B,B,B,B,A,A,A,A,A,A,B,-,-,B,A,B,A,A,B,A,B,A,A,B,A,B,B,B,B,-,A,A,B,B,A,A,B,A,B,B,B,B,-,A,B,-,B,A,-,A,A,B,A,A,-,A,B,-,B,A,-,B,-,B,-,B,A,A,B
S21_902192,,-,B,-,B,B,B,-,B,B,B,B,B,B,A,-,A,-,A,-,A,B,B,B,A,B,A,A,B,B,A,B,B,-,A,B,B,B,B,B,B,A,B,B,A,B,-,-,A,A,B,B,B,A,A,B,A,A,A,A,B,B,A,-,B,B,B,A,-,B,B,B,A,A,-,A,A,A,A,A,B,A,A,B,A,B,-,A,B,A,B,-,B,B,A,A,B,B,B,B,B,B,B,B,B,A,A,A,A,A,A,B,-,A,B,A,B,A,A,B,A,B,A,A,B,A,B,B,B,B,A,A,A,B,B,A,A,B,-,B,B,B,B,B,-,B,A,B,A,-,A,A,B,A,A,-,A,B,-,B,A,A,B,A,B,-,B,A,A,B
S21_928627,,-,B,-,B,B,B,A,B,-,B,B,-,B,A,-,A,A,A,A,A,B,B,-,A,B,A,A,B,B,A,B,B,A,A,B,B,-,B,B,B,A,B,B,A,B,A,A,A,A,B,-,B,A,A,B,A,A,A,A,B,B,A,-,B,B,B,A,A,B,B,B,A,A,-,A,A,A,A,A,-,A,A,B,A,B,A,A,B,A,B,-,B,B,A,A,B,B,B,B,B,B,B,B,B,A,A,A,A,A,A,B,-,A,B,A,-,A,A,B,-,B,A,A,B,A,B,B,B,-,A,A,A,B,B,A,-,B,A,-,B,A,B,-,A,B,A,B,A,-,A,A,A,A,A,A,A,B,A,B,A,A,B,A,B,-,B,A,A,B
S21_980237,,-,B,-,B,B,B,A,B,-,B,B,B,B,A,A,A,A,A,A,A,B,B,B,A,B,A,A,B,B,A,B,B,A,A,B,B,A,B,B,B,A,B,B,A,B,A,A,A,A,B,B,B,A,A,B,A,A,A,A,B,B,A,A,B,B,B,A,A,B,B,B,A,A,B,A,A,A,A,A,B,A,A,B,A,B,A,A,B,A,B,A,B,B,A,A,B,B,-,B,B,B,B,B,B,A,A,A,A,A,A,B,-,A,B,A,B,A,A,B,A,B,A,A,B,A,B,B,B,B,A,A,A,B,B,A,A,B,A,B,B,-,B,-,A,B,A,B,A,-,A,A,-,A,A,A,A,B,A,B,A,A,B,A,B,-,B,A,A,A
S21_998987,,-,B,-,B,B,B,-,B,B,B,B,-,B,A,A,A,A,A,-,A,B,B,-,A,B,A,A,B,B,A,B,B,A,A,B,B,A,B,B,B,A,B,B,A,B,A,A,A,A,B,B,B,A,A,B,A,A,A,A,B,B,A,-,B,B,B,A,A,B,B,B,A,A,B,A,A,A,A,A,-,A,A,-,A,B,A,A,B,A,B,A,B,B,A,A,B,B,-,B,B,B,B,B,B,A,A,A,A,-,A,B,-,A,B,A,B,A,A,B,-,B,A,A,B,A,B,B,B,B,A,A,A,B,B,A,A,B,A,-,B,-,B,-,A,B,A,B,A,-,A,A,B,A,A,-,A,B,A,B,A,A,B,-,B,-,B,A,A,A
S21_1027836,,B,B,-,B,B,B,A,B,B,B,B,B,B,A,A,A,A,A,A,A,B,B,B,A,B,A,A,B,B,A,B,B,A,A,B,B,-,B,B,B,A,B,B,A,B,A,A,A,A,B,B,B,A,A,B,A,A,A,A,B,B,A,A,B,B,B,A,A,B,B,B,A,A,B,A,A,A,A,A,B,A,A,B,A,B,A,A,B,A,B,A,B,B,A,A,B,B,-,B,B,B,B,B,B,A,A,A,A,A,A,B,B,A,B,A,B,A,A,B,A,B,A,A,B,A,B,B,B,B,A,A,A,B,B,A,A,B,A,B,B,-,B,-,A,B,A,B,A,A,A,A,-,A,A,A,A,B,A,B,A,A,B,A,B,-,B,A,A,A
S21_1128047,,-,B,-,B,B,B,A,A,-,B,B,B,B,A,A,A,A,A,A,A,B,B,-,A,B,A,A,B,B,A,B,B,A,A,B,B,-,B,B,A,A,B,B,A,-,A,A,A,A,B,B,B,A,A,B,A,A,A,A,B,B,A,-,B,B,B,A,A,B,B,B,A,A,-,A,A,A,A,A,B,A,A,B,A,B,A,A,B,A,B,A,B,B,A,A,B,B,-,B,B,B,B,B,B,A,A,A,A,A,A,B,B,A,B,A,B,-,A,B,A,B,A,A,B,A,B,B,B,B,A,A,A,B,B,A,-,B,A,-,B,-,B,-,A,B,A,B,B,-,A,-,-,A,A,A,A,B,A,B,A,A,B,A,B,-,B,B,A,A
S21_1129064,,-,B,-,B,-,B,-,A,-,B,B,B,B,A,-,A,A,A,A,A,B,B,-,A,B,A,A,-,B,A,B,-,-,A,B,B,B,B,B,A,A,B,B,A,B,A,A,A,A,-,B,B,A,-,B,A,A,A,A,B,B,A,-,B,B,B,A,A,B,B,B,A,-,-,A,A,A,A,A,-,A,A,B,A,B,A,-,B,A,B,A,B,B,A,A,B,B,-,B,B,B,B,B,B,A,-,A,A,A,A,B,-,A,B,-,B,-,A,B,A,B,A,A,B,A,B,B,B,B,A,A,A,B,B,A,-,B,-,-,B,A,B,-,A,B,A,B,B,-,A,A,-,A,A,A,A,B,-,B,A,A,B,A,B,-,B,B,A,A
S21_1130169,,B,B,-,B,B,B,A,A,-,B,B,B,B,A,A,A,A,A,A,A,B,B,B,A,B,A,A,B,B,A,B,B,A,A,B,B,-,B,B,A,A,B,B,A,B,A,A,A,A,B,B,B,A,A,B,A,A,A,A,B,B,A,B,B,B,B,A,A,B,B,B,A,A,-,A,A,A,A,A,B,A,A,B,A,B,A,A,B,A,B,A,B,B,A,A,B,B,-,B,B,B,B,B,B,A,A,A,A,A,A,B,-,A,B,A,B,-,A,B,A,B,A,A,B,A,B,B,B,B,A,A,A,B,B,A,A,B,A,B,B,-,B,-,A,B,A,B,B,-,A,-,-,A,A,A,A,B,A,B,A,A,B,A,B,-,B,B,A,A
S21_1186499,,-,B,-,B,-,B,A,A,-,B,B,-,B,A,-,A,A,A,A,A,B,B,B,A,B,A,A,B,B,A,B,B,A,A,B,B,-,B,B,A,A,B,B,A,-,A,A,A,A,B,B,B,A,A,B,A,A,A,A,B,B,A,B,B,B,B,A,-,B,B,B,-,A,-,-,A,A,A,A,-,A,A,B,A,B,A,-,B,A,B,-,B,B,A,A,B,B,A,B,B,A,B,B,B,A,A,A,A,A,A,B,-,A,B,A,-,-,A,B,A,B,A,A,B,A,B,B,B,B,A,A,A,B,B,B,-,B,A,-,B,-,B,-,A,B,A,B,B,-,A,A,-,A,A,A,A,B,A,B,A,A,B,A,B,-,B,B,A,A
S21_1201708,,-,B,-,B,B,B,A,A,-,-,B,B,B,A,A,A,A,A,A,A,B,B,-,-,B,A,A,B,B,-,-,B,-,A,B,B,-,-,B,A,A,B,B,A,-,A,A,-,A,B,B,B,A,A,B,A,A,A,A,B,B,A,-,B,B,B,-,A,B,B,B,A,A,-,A,A,A,A,A,-,A,A,B,-,B,A,A,B,A,B,A,B,B,A,A,B,B,-,B,B,A,B,B,B,A,A,A,A,A,A,B,-,A,B,A,B,-,A,B,-,B,A,A,B,A,B,B,B,-,-,A,A,B,B,B,A,-,A,-,B,-,B,-,A,-,A,B,B,-,A,A,A,-,A,A,A,B,-,B,A,A,B,A,B,-,B,B,A,A
S21_1202936,,-,B,-,B,B,B,A,A,-,B,B,B,B,A,A,A,A,A,A,A,B,B,B,A,B,A,A,B,B,A,B,B,A,A,B,B,-,B,B,A,A,B,B,A,B,A,A,A,A,B,B,B,A,A,B,A,A,A,A,B,B,A,B,B,B,B,A,A,B,B,B,A,A,A,A,A,A,A,A,B,A,A,B,A,B,A,A,B,A,B,A,B,B,A,A,B,B,-,B,B,A,B,B,B,A,A,A,A,A,A,B,B,A,B,A,B,-,A,B,A,B,A,A,B,A,B,B,B,B,A,A,A,B,B,B,A,B,A,B,B,-,B,-,A,B,A,B,B,-,A,-,A,A,A,A,A,B,A,B,A,A,B,A,B,-,B,B,A,A
S21_1219657,,-,B,-,B,B,B,A,A,-,B,B,B,B,A,-,A,A,A,A,A,B,B,-,A,B,A,A,B,B,A,B,-,A,A,B,B,-,-,B,A,A,B,B,A,-,A,A,A,A,B,B,-,A,A,B,A,A,A,A,B,B,A,-,B,B,B,A,A,B,B,B,A,A,-,A,A,A,A,A,-,A,A,-,A,B,A,A,-,A,B,-,B,B,A,A,B,B,B,B,B,A,B,B,B,A,-,A,A,A,A,B,-,A,B,A,B,-,A,B,-,B,A,A,B,A,B,B,B,-,A,-,B,B,B,B,A,B,A,-,B,A,B,-,A,B,A,B,B,-,A,-,-,A,A,A,A,B,A,B,A,A,B,A,B,-,B,B,A,A
S21_1236440,,-,B,-,B,B,B,A,A,A,B,B,B,B,A,A,A,A,A,A,A,B,B,-,A,B,A,A,B,B,A,B,B,A,A,B,B,-,B,B,A,A,B,B,A,B,A,A,A,A,B,B,B,A,A,B,A,A,A,A,B,B,A,B,B,B,B,A,B,B,B,B,A,A,B,A,A,A,A,A,B,A,B,B,A,B,A,A,B,A,B,A,B,B,A,A,B,B,-,B,B,A,B,B,B,A,A,A,A,A,A,B,B,A,B,A,B,-,A,B,A,B,A,A,B,A,B,B,B,B,A,A,B,B,B,B,A,B,A,B,B,-,B,-,A,B,A,B,B,-,A,-,-,A,A,A,A,B,A,B,A,A,B,A,B,-,B,B,A,A
S21_1240918,,-,B,-,-,B,B,-,A,-,-,B,B,B,A,-,A,A,A,A,A,B,B,-,A,B,A,A,-,B,A,B,B,A,A,B,-,-,-,B,A,A,B,B,A,B,A,A,A,A,B,B,B,A,A,B,A,A,A,A,B,A,A,-,-,B,B,-,-,B,B,B,A,A,A,A,A,A,A,A,-,A,B,B,A,B,A,A,B,A,B,A,B,B,A,A,B,B,B,B,B,A,-,B,B,A,A,A,A,A,A,B,-,A,B,A,B,B,A,B,A,B,A,A,B,A,B,B,B,B,A,A,B,B,B,B,-,B,A,-,B,B,B,-,A,-,A,B,B,-,A,A,-,A,A,A,A,B,A,B,A,A,B,A,-,-,B,B,A,A
S21_1242392,,-,B,-,B,B,B,A,A,A,B,B,B,B,A,A,A,A,A,A,A,B,B,B,A,B,A,A,B,B,A,B,B,A,A,B,B,-,-,B,A,A,B,B,A,B,A,A,A,A,B,B,B,A,A,B,A,A,A,A,B,A,A,-,B,B,B,A,B,B,B,B,A,A,-,A,A,A,A,A,-,A,B,B,A,B,A,A,B,A,B,A,B,B,A,A,B,B,-,B,B,A,B,B,B,A,A,A,A,A,A,B,-,A,B,A,B,-,A,B,A,B,A,A,B,A,B,B,B,B,A,A,B,B,B,B,A,B,A,-,B,-,B,-,A,B,A,B,B,-,A,-,-,A,A,A,A,B,A,B,A,A,B,A,B,-,B,B,A,A
S21_1273713,,-,B,-,B,B,B,A,A,A,B,B,B,B,A,A,A,A,A,A,A,B,B,-,A,B,A,A,B,B,A,B,B,A,A,B,B,-,B,B,A,A,B,B,A,B,A,A,A,A,B,B,B,A,A,B,A,A,A,A,B,A,A,B,B,B,B,A,B,B,B,B,A,A,-,A,A,A,A,A,-,A,B,B,A,B,A,A,B,A,B,A,B,B,A,A,B,B,-,B,B,A,B,B,B,A,A,A,A,A,A,B,-,A,B,A,B,-,A,B,A,B,A,A,B,A,B,B,B,B,A,A,B,B,B,B,A,B,A,B,B,-,B,-,A,B,A,B,B,-,A,-,-,A,A,A,A,B,A,B,A,A,B,A,B,-,B,B,A,A
S21_1280217,,-,B,B,B,B,B,-,A,A,B,B,B,A,-,-,A,-,A,A,A,B,B,B,A,B,A,A,B,B,A,B,B,A,A,B,B,-,B,B,A,A,B,B,A,B,A,A,A,A,B,B,B,A,-,B,A,A,A,A,B,-,A,B,B,B,B,A,B,B,B,B,A,A,-,-,A,A,A,A,-,A,B,B,A,B,A,A,B,A,B,A,B,B,A,A,B,B,B,B,B,A,B,B,B,A,A,A,A,A,-,B,-,A,B,A,B,B,A,B,-,B,A,A,B,A,B,B,B,B,A,A,B,B,B,B,-,B,-,B,B,-,B,-,A,B,A,B,B,-,A,B,B,A,A,-,A,B,-,B,A,A,B,A,B,-,B,B,A,A
S21_1312631,,-,B,-,B,B,B,A,A,A,B,B,B,A,A,A,A,A,A,A,A,B,B,B,A,B,A,A,B,B,A,B,B,A,A,B,B,-,B,B,A,A,B,B,A,B,A,A,A,A,B,B,B,A,A,B,A,A,A,A,B,A,A,-,B,B,B,A,B,B,B,B,A,A,-,A,A,A,A,A,-,A,B,B,A,B,A,A,B,A,B,A,B,B,A,A,B,B,-,B,B,A,B,B,B,A,A,A,A,A,A,B,-,A,B,A,B,-,A,B,A,B,A,A,B,A,B,B,B,B,A,A,B,B,B,B,-,B,A,B,B,-,B,-,A,B,A,B,B,-,A,-,-,A,A,B,A,B,A,B,A,A,B,A,B,-,B,B,A,A
S21_1326062,,-,B,-,B,B,B,A,A,A,B,B,B,A,A,A,A,A,A,A,A,B,B,-,A,B,A,A,B,B,A,B,B,A,A,B,B,A,B,B,A,A,B,B,A,B,A,A,A,A,B,B,B,A,A,B,A,A,A,A,B,A,A,-,B,B,B,A,B,B,B,B,A,A,-,A,A,A,A,A,-,A,B,B,A,B,A,A,B,A,B,A,B,B,A,A,B,B,-,B,B,A,B,B,B,A,A,A,A,A,A,B,-,A,B,A,B,-,A,B,A,B,A,A,B,A,B,B,B,B,A,A,B,B,B,B,-,B,A,B,B,-,B,B,A,B,A,B,B,-,A,A,B,A,A,B,A,B,A,B,A,A,B,A,B,-,B,B,A,A
S21_1387803,,-,B,-,B,B,B,A,A,A,B,B,B,A,A,A,A,A,A,A,A,B,B,-,A,B,A,A,B,B,A,A,B,A,A,B,B,A,B,B,A,A,B,B,A,B,A,A,A,A,B,B,B,A,A,B,A,A,A,A,B,A,A,-,B,B,B,A,B,B,A,B,A,A,B,A,A,A,A,A,A,A,B,B,A,B,A,A,B,A,B,A,B,B,B,A,B,B,A,B,B,A,B,B,B,A,A,B,A,A,A,B,-,A,B,A,B,-,A,B,A,B,A,A,B,A,B,B,B,B,A,A,A,B,B,B,A,B,A,B,B,-,B,-,A,B,A,B,B,-,A,A,-,A,A,B,A,B,A,B,A,A,B,A,B,-,B,B,A,A
S21_1391075,,-,B,-,B,B,B,A,A,-,-,B,B,A,A,A,A,A,A,A,A,B,B,-,A,B,-,A,-,B,-,-,B,A,A,B,B,A,-,-,A,A,-,B,A,-,A,A,A,A,B,B,B,A,A,B,A,A,A,A,B,-,-,-,B,B,B,A,B,B,A,B,A,-,-,A,-,A,A,-,-,A,B,B,A,-,A,A,B,A,B,A,B,B,B,A,B,-,A,B,B,A,B,B,B,A,A,B,A,A,A,B,-,A,B,A,B,A,A,B,A,B,A,A,B,A,B,B,B,B,A,A,A,B,B,B,A,B,A,-,-,A,B,-,A,B,A,B,B,-,A,-,-,-,A,-,A,B,A,B,A,A,B,A,B,-,B,B,A,A
S21_1397368,,-,B,-,B,B,B,A,A,A,B,B,-,A,A,A,A,A,A,A,A,B,B,-,A,B,A,A,B,B,A,A,-,A,A,B,B,A,B,B,A,A,B,B,A,B,A,A,A,A,B,B,B,A,A,B,A,A,A,A,B,A,A,B,B,B,B,A,B,B,A,B,A,A,-,A,A,A,A,A,A,A,B,B,A,B,A,A,B,A,B,A,B,B,B,A,B,B,A,B,B,A,-,B,B,A,A,B,A,A,A,B,-,A,B,A,B,-,A,B,A,B,A,A,B,A,B,B,B,B,A,A,A,B,B,B,A,B,A,-,B,-,B,-,A,B,A,B,B,-,A,A,A,A,A,B,A,B,A,B,A,A,B,A,B,-,B,B,A,A
S21_1398557,,-,B,-,B,-,B,A,A,A,B,B,B,A,A,A,A,A,A,A,A,B,B,-,A,B,A,A,B,B,A,A,B,A,A,B,B,-,-,B,A,A,B,B,A,B,A,A,A,A,B,B,B,A,A,B,A,A,A,A,B,A,A,-,B,B,B,A,B,B,A,B,A,A,-,A,A,A,A,A,-,A,B,B,A,B,A,A,B,A,B,A,B,B,B,A,B,B,A,B,B,A,B,B,B,A,A,B,A,A,A,B,-,A,B,A,B,-,A,B,A,B,A,A,B,A,B,B,B,B,A,A,A,B,B,B,A,B,A,-,B,-,B,-,A,B,A,B,B,-,A,-,B,A,A,B,A,B,A,B,A,A,B,A,B,-,B,B,A,A
S21_1401540,,-,B,-,B,B,B,A,A,A,B,B,B,A,A,A,A,A,A,A,A,B,B,-,A,B,A,A,B,B,A,A,B,-,A,B,B,A,-,B,A,A,B,B,A,B,A,A,A,A,B,B,B,A,A,B,A,A,A,A,B,A,A,-,B,B,B,A,B,B,A,B,A,A,-,A,A,A,A,A,-,A,B,B,A,B,A,A,B,A,B,A,B,B,B,A,B,B,A,B,B,A,B,B,B,A,A,B,A,A,A,B,-,A,B,A,-,B,A,B,A,B,A,A,B,A,B,B,B,B,A,A,A,B,B,B,-,B,A,-,B,-,B,-,A,-,A,B,B,-,A,-,-,A,A,B,A,B,A,B,A,A,B,A,B,-,B,B,A,A
S21_1409422,,-,B,-,B,-,B,A,A,A,B,B,-,A,A,A,A,A,A,A,A,B,B,B,A,B,A,A,B,B,A,A,B,A,A,B,B,-,-,B,A,A,B,B,A,B,A,A,A,A,B,B,B,A,A,B,A,A,A,A,B,A,A,-,B,B,B,A,B,B,A,B,A,A,-,A,A,A,A,A,-,A,B,B,A,B,A,A,B,A,B,A,B,B,B,A,B,B,A,B,B,A,B,B,B,A,A,B,A,A,A,B,-,A,B,A,B,-,A,B,A,B,A,A,B,A,B,B,B,B,A,A,A,B,B,B,-,B,A,B,B,-,B,-,A,B,A,B,B,-,A,-,-,A,A,B,A,B,-,B,A,A,B,A,B,-,B,B,A,A
S21_1410636,,-,B,B,B,B,B,A,A,A,B,B,B,A,A,A,A,A,A,A,A,B,B,B,A,B,A,A,B,B,A,A,B,A,A,B,B,-,B,B,A,A,B,B,A,B,A,A,A,A,B,B,B,A,A,B,A,A,A,A,B,A,A,B,B,B,B,A,B,B,A,B,A,A,A,A,A,A,A,A,A,A,B,B,A,B,A,A,B,A,B,A,B,B,B,A,B,B,A,B,B,A,B,B,B,A,A,B,A,A,A,B,B,A,B,A,B,-,A,B,A,B,A,A,B,A,B,B,B,B,A,A,A,B,B,B,A,B,A,-,B,-,B,-,A,B,A,B,B,-,A,-,-,A,A,B,A,B,A,B,A,A,B,A,B,-,B,B,A,A
S21_1415589,,-,B,-,B,B,B,A,A,A,B,B,B,A,A,A,A,A,A,A,A,B,B,-,A,B,A,A,B,B,A,A,B,A,A,B,B,-,B,B,A,A,B,B,A,B,A,A,A,A,B,B,B,A,A,B,A,A,A,A,B,A,A,B,B,B,B,A,B,B,A,B,A,A,A,A,A,A,A,A,A,A,B,B,A,B,A,A,B,A,B,A,B,B,B,A,B,B,A,B,B,A,B,B,B,A,A,B,A,A,A,B,-,A,B,A,B,-,A,B,A,B,A,A,B,A,B,B,B,B,A,A,A,B,B,B,A,B,A,-,B,-,B,-,A,B,A,B,B,-,A,-,-,A,A,B,A,B,A,B,A,A,B,A,B,-,B,B,A,A
S21_1416791,,-,B,-,B,B,B,A,A,A,B,B,B,A,A,A,A,A,A,A,A,B,B,B,A,B,A,A,B,B,A,A,B,A,A,B,B,A,B,B,A,A,B,B,A,B,A,A,A,A,B,B,B,A,A,B,A,A,A,A,B,A,A,-,B,B,B,A,B,B,A,B,A,A,-,A,A,A,A,A,-,A,B,B,A,B,A,A,B,A,B,A,B,B,B,A,B,B,A,B,B,A,B,B,B,A,A,B,A,A,A,B,-,A,B,A,B,-,A,B,A,B,A,A,B,A,B,B,B,B,A,A,A,B,B,B,A,B,A,-,B,-,B,-,A,-,A,B,B,-,A,-,-,A,A,B,A,B,A,B,A,A,B,A,B,-,B,B,A,A
S21_1418881,,-,B,-,B,B,B,A,A,A,B,B,B,A,A,-,A,A,A,A,A,B,B,-,A,B,A,A,B,B,A,A,B,A,A,B,B,-,B,B,A,A,B,B,A,B,A,A,A,A,B,B,B,A,A,B,A,A,A,A,B,A,A,B,B,B,B,A,B,B,A,B,A,A,-,A,A,A,A,A,A,A,B,B,A,B,A,A,B,A,B,A,B,B,B,A,B,B,A,B,B,A,B,B,B,A,A,B,A,A,A,B,-,A,B,A,B,-,A,B,A,B,A,A,B,A,B,B,B,B,A,A,A,B,B,B,A,B,A,B,B,-,B,-,A,B,A,B,B,-,A,A,-,A,A,B,A,B,A,B,A,A,B,A,B,B,B,B,A,A
S21_1424475,,-,B,-,B,B,B,A,A,A,B,B,B,A,A,A,A,A,A,A,A,B,B,-,A,B,A,A,B,B,A,A,B,A,A,B,B,A,B,B,A,A,B,B,A,B,A,A,A,A,B,B,B,A,A,B,A,A,A,A,B,A,A,B,B,B,B,A,B,B,A,B,A,A,-,A,A,A,A,A,-,A,B,B,A,B,A,A,B,A,B,A,B,B,B,A,B,B,A,B,B,A,B,B,B,A,A,B,A,A,A,B,-,A,B,A,B,-,A,B,A,B,A,A,B,A,B,B,B,B,A,A,A,B,B,B,A,B,A,B,B,A,B,-,A,B,A,B,B,-,A,A,B,A,A,B,A,B,A,B,A,A,B,A,B,-,B,B,A,A
S21_1467526,,-,B,-,B,B,B,A,A,A,B,B,B,A,B,A,A,A,A,A,A,B,B,B,A,B,A,A,B,B,A,B,B,A,A,B,B,A,B,B,A,A,B,B,A,-,A,A,A,A,B,B,B,A,A,B,A,A,A,A,B,A,A,B,B,B,B,B,B,B,A,B,A,A,-,A,B,A,A,A,-,A,B,B,A,B,A,A,B,B,B,A,B,B,B,B,B,B,A,B,B,A,B,B,B,A,A,A,A,A,A,B,-,A,B,A,B,A,A,B,A,B,A,A,B,A,B,B,B,B,A,A,A,B,B,B,A,B,B,-,B,-,B,-,A,B,A,B,B,-,A,-,A,A,A,B,A,B,A,B,A,A,B,A,B,-,B,B,A,A
S21_1488643,,-,B,-,B,B,B,A,A,A,B,B,B,A,B,A,A,A,A,A,A,B,B,B,A,B,A,A,B,B,A,B,B,A,A,B,B,A,-,B,A,A,B,B,A,B,B,A,A,A,B,B,B,A,A,B,A,B,A,A,B,A,A,B,B,B,B,B,B,B,A,B,A,A,-,A,B,A,A,A,-,A,B,B,A,B,A,A,B,B,B,A,B,B,B,B,B,B,A,B,B,A,B,B,B,A,A,A,A,A,A,B,B,A,B,A,B,A,A,B,A,B,A,A,B,A,B,B,B,B,A,A,A,B,B,B,A,B,B,B,B,-,B,-,A,B,A,B,B,-,A,-,A,A,A,B,A,B,A,B,A,A,B,A,B,-,B,B,A,A
S21_1521865,,-,B,-,B,B,B,A,A,A,-,B,B,A,B,A,A,A,A,A,A,B,B,-,A,B,A,A,-,B,A,B,B,A,A,B,B,B,B,B,A,A,B,B,A,B,-,A,A,A,A,B,B,B,A,B,A,B,A,A,B,A,A,B,B,B,B,B,B,B,A,B,A,A,-,A,B,A,A,A,-,A,B,B,A,A,A,A,B,B,B,A,B,B,B,B,B,B,A,B,B,A,B,B,B,A,A,A,A,A,A,B,-,A,B,A,B,A,A,B,A,B,A,A,B,A,B,B,B,B,A,A,A,B,B,B,A,B,B,-,B,-,B,-,A,-,A,B,B,-,A,-,-,A,A,B,A,B,A,B,A,A,B,A,-,-,B,B,A,A
S21_1539095,,-,B,-,B,B,B,A,A,A,B,B,B,A,B,A,A,A,A,A,A,B,B,-,A,B,A,A,B,B,A,B,B,A,A,B,B,B,B,B,A,A,B,B,A,B,B,A,A,A,A,B,B,B,A,B,A,B,A,A,B,A,A,B,B,B,B,B,B,B,A,B,A,A,-,A,B,A,A,A,-,A,B,B,A,A,A,A,B,B,B,A,B,B,B,B,B,B,A,B,B,A,B,B,B,A,A,B,A,A,A,B,-,A,B,A,B,A,A,B,-,B,A,A,B,A,B,B,B,B,A,A,A,B,B,B,A,B,B,-,B,-,B,-,A,B,A,B,B,-,A,-,-,A,A,B,A,B,-,B,A,A,B,A,B,-,B,B,A,A
S21_1630789,,-,B,-,B,B,A,A,A,A,B,B,B,A,B,A,A,A,A,A,A,B,A,-,A,B,-,A,-,A,A,B,B,A,A,B,-,B,B,B,A,A,B,B,A,-,B,A,A,A,A,B,B,B,A,B,A,-,A,A,B,A,A,-,-,B,-,B,B,B,A,B,A,A,-,A,B,A,A,A,A,A,A,B,A,A,A,A,A,B,B,A,B,B,B,B,B,B,A,B,-,B,B,B,B,A,A,B,A,A,A,B,-,A,A,A,B,A,A,B,A,B,A,A,B,A,B,B,B,B,A,A,A,-,B,B,A,A,B,-,-,-,B,-,A,B,A,B,B,-,A,-,A,A,A,-,A,A,A,B,A,A,B,A,-,-,B,B,A,A
S21_1636879,,-,B,-,B,B,A,A,A,A,B,B,B,A,B,A,A,A,A,A,A,B,A,B,A,B,B,A,B,A,A,B,B,A,A,B,B,B,B,B,A,A,B,B,A,B,B,A,A,A,A,B,B,B,A,B,A,B,A,A,B,A,A,B,B,B,B,B,B,B,A,B,A,A,A,A,B,A,A,A,A,A,A,B,A,A,A,A,A,B,B,A,B,B,B,B,B,B,A,B,B,B,B,B,B,A,A,B,A,A,A,B,B,A,A,A,B,A,A,B,A,B,A,A,B,A,B,B,B,B,A,A,A,B,B,B,A,A,B,B,B,-,B,-,A,B,A,B,B,-,A,-,A,A,A,B,A,A,A,B,A,A,B,A,B,-,B,B,A,A
S21_1639837,,-,B,-,B,B,A,A,A,A,B,B,-,A,B,A,-,A,A,A,A,-,A,-,A,B,B,A,B,A,A,B,B,A,A,B,-,B,B,B,A,A,B,B,A,B,B,A,A,A,A,-,B,B,A,B,A,B,A,A,B,A,A,-,B,B,B,B,B,B,A,B,A,A,-,A,B,A,A,A,A,A,A,B,A,A,A,A,A,B,B,A,B,B,B,B,B,B,A,B,B,B,B,B,B,A,A,B,A,A,A,B,-,A,A,A,B,A,A,B,A,B,A,A,B,A,B,B,B,B,A,A,A,B,B,-,-,A,B,B,B,A,B,-,A,B,A,B,B,-,A,-,A,A,A,B,A,A,A,B,A,A,B,A,B,-,B,B,A,A
S21_1720150,,-,B,-,B,B,A,B,A,A,B,B,B,A,B,A,A,A,A,A,A,B,A,-,A,A,B,A,B,A,A,B,B,A,A,B,B,B,B,B,A,A,B,B,A,B,B,A,A,A,A,B,B,B,A,B,A,B,A,A,B,A,A,B,B,B,B,B,B,B,A,B,A,A,A,A,B,A,A,A,A,A,A,B,A,A,A,A,A,B,A,A,B,B,B,B,B,A,A,B,B,B,B,B,B,A,A,B,A,A,A,B,-,A,A,A,B,A,A,B,-,B,A,A,B,A,B,B,B,B,A,A,A,B,B,B,A,A,B,-,B,-,B,-,A,B,A,B,B,-,A,-,A,A,A,B,A,A,A,B,A,A,B,A,B,-,B,B,A,A
S21_1737880,,-,B,-,B,B,A,B,A,A,B,B,-,A,B,A,A,A,A,A,A,B,A,-,A,A,B,A,-,A,A,B,B,-,A,B,B,B,B,B,A,A,B,B,A,B,B,A,A,A,A,B,-,B,A,B,A,B,A,A,B,A,A,-,B,B,B,B,B,B,A,B,A,A,-,A,B,A,A,A,A,A,A,B,-,A,-,A,A,B,A,A,B,B,B,B,B,A,A,B,-,B,B,B,B,A,-,B,A,A,A,-,-,A,A,A,B,A,A,B,A,B,A,A,B,A,B,B,B,B,A,A,A,B,B,B,A,A,B,A,B,A,B,-,A,-,A,B,B,-,A,-,A,A,A,-,A,A,A,-,A,A,B,A,B,-,B,B,A,A
S21_1760360,,-,B,-,B,B,A,B,A,A,B,B,B,A,B,A,A,A,A,A,A,B,A,-,A,A,B,A,B,A,A,B,B,A,A,B,B,B,B,B,A,A,B,B,A,B,B,A,A,A,A,B,B,B,A,B,A,B,A,A,B,A,A,B,B,B,B,B,B,B,A,B,A,A,-,A,B,A,A,A,B,A,A,B,A,A,A,A,A,B,A,A,B,B,B,B,B,A,A,B,B,B,B,B,B,A,A,B,A,A,A,B,-,A,A,A,B,A,A,B,A,B,A,A,B,A,B,B,B,B,A,A,A,B,B,B,A,A,B,A,B,-,B,-,A,-,A,B,B,-,A,-,A,A,A,B,A,A,A,B,A,A,B,A,B,-,B,B,A,A
S21_1775665,,-,B,-,B,B,A,B,A,A,B,B,-,A,B,A,A,A,A,A,A,B,A,-,A,A,B,A,B,A,A,-,B,A,A,B,B,B,B,B,A,A,B,B,A,-,B,A,A,A,A,B,B,-,A,B,A,B,A,A,B,A,A,-,B,B,B,B,B,B,A,B,A,A,-,A,B,A,A,A,-,A,A,B,A,A,A,A,A,B,A,A,B,B,B,B,B,A,A,B,B,-,B,B,B,A,A,B,A,A,A,-,-,A,A,A,B,A,A,-,A,B,A,A,B,A,B,B,-,B,A,A,A,B,B,-,A,A,-,A,B,-,B,-,A,B,A,B,B,-,A,A,A,A,A,B,A,A,A,B,A,A,B,A,B,-,B,B,A,A
S21_1778657,,-,B,-,B,B,A,B,A,A,B,B,B,A,B,-,A,A,-,A,A,B,A,-,A,A,B,A,B,A,A,B,B,-,A,B,B,B,-,B,A,A,B,B,A,B,B,A,A,A,A,B,B,B,A,B,A,B,A,A,B,A,A,-,B,B,B,B,B,B,A,B,A,A,-,A,B,A,A,A,-,A,A,B,A,A,-,A,A,B,A,-,B,B,B,B,B,A,A,B,B,B,B,B,B,A,A,B,A,A,A,B,-,A,A,A,-,A,A,B,A,B,A,A,B,A,B,B,B,B,A,A,A,B,B,B,-,A,B,-,B,-,B,-,A,B,A,B,B,-,A,-,A,A,A,B,A,A,A,B,A,A,B,A,B,-,B,B,A,A
S21_1837331,,-,B,-,B,B,A,B,-,A,B,B,B,A,B,-,A,A,A,A,A,B,A,B,A,A,B,A,B,A,A,B,B,A,A,B,B,B,B,B,A,A,B,B,A,B,B,A,A,A,A,B,B,B,A,B,A,B,A,A,B,A,A,-,B,B,B,B,B,B,A,B,A,A,-,A,B,A,A,A,B,A,A,B,A,A,A,B,A,B,A,A,-,-,B,B,B,A,A,B,B,B,B,B,B,A,A,B,A,A,A,B,B,A,A,A,B,A,A,B,B,B,A,A,B,A,B,B,B,B,A,A,A,B,B,A,A,A,B,A,B,-,B,-,A,B,A,B,B,-,A,-,-,A,A,B,A,A,A,B,B,A,B,A,B,-,B,B,A,A
S21_1943632,,B,B,-,B,B,A,B,B,A,B,B,B,A,B,A,A,A,-,A,A,B,-,B,A,A,B,A,B,A,A,B,B,A,A,B,B,B,B,B,A,A,B,B,A,-,B,A,A,A,A,B,B,B,-,B,A,B,A,A,B,A,A,-,B,B,B,B,B,B,A,B,A,A,A,A,B,A,A,A,-,A,A,B,A,A,-,B,-,B,A,A,B,A,B,B,B,-,-,B,B,B,B,B,B,A,A,B,A,A,A,B,-,A,A,-,B,A,A,B,B,A,A,A,B,A,B,B,B,B,A,A,A,B,B,A,-,A,B,-,B,-,B,-,A,B,A,B,B,-,A,-,-,A,A,B,B,A,A,B,B,A,B,-,B,-,B,B,A,A
S21_1945654,,-,B,-,B,B,A,B,-,A,B,B,B,A,B,A,A,A,A,A,A,B,A,-,A,A,B,A,B,A,A,B,B,A,A,B,B,B,-,B,A,A,B,B,A,B,B,A,A,A,A,B,B,B,A,B,A,B,A,A,B,A,A,-,B,B,B,B,B,B,A,B,A,A,-,A,B,A,A,A,-,A,A,B,A,A,A,B,A,B,A,A,B,A,B,B,B,A,A,B,B,B,B,B,B,A,A,B,A,A,A,B,B,A,A,A,B,A,A,B,B,A,A,A,B,A,B,B,B,B,A,A,A,B,B,A,-,A,B,-,B,-,B,-,A,-,A,B,B,-,A,-,A,A,A,B,B,A,A,B,B,A,B,A,B,-,B,B,A,-
S21_1974267,,-,B,-,B,B,A,B,A,A,B,B,B,A,B,-,A,A,A,A,A,B,A,-,A,A,-,A,B,A,-,B,B,-,A,B,B,B,-,B,A,A,B,B,A,-,B,-,A,A,-,B,B,B,A,B,A,B,A,A,B,-,A,-,B,B,B,A,B,B,A,B,A,A,-,A,B,A,A,-,B,A,A,B,A,A,A,B,A,B,A,A,B,A,B,A,B,A,A,B,B,B,B,B,B,A,A,A,-,A,A,B,B,A,A,A,B,A,A,B,B,A,A,A,B,-,B,B,B,B,A,A,-,B,B,A,-,A,B,-,B,-,B,-,A,B,A,B,B,-,A,-,B,A,A,-,B,A,-,B,B,A,B,A,B,-,B,B,A,A
S21_2030784,,-,B,-,B,B,A,B,A,A,B,B,B,A,B,A,A,A,A,A,A,B,A,B,A,A,B,A,B,A,A,B,B,A,A,B,B,B,B,B,A,A,B,B,A,B,B,A,A,A,A,A,B,B,A,B,A,B,A,A,B,A,A,B,B,B,B,A,B,B,A,B,A,A,-,A,B,A,A,-,B,A,A,B,A,A,A,B,A,B,A,A,B,A,B,A,A,A,A,B,B,B,B,B,B,A,A,A,A,A,A,B,B,A,A,A,B,A,A,B,B,A,A,A,A,A,B,B,B,B,A,A,A,B,B,A,A,A,B,A,B,-,B,-,A,B,A,B,B,-,A,-,B,A,A,B,B,A,A,B,B,A,B,A,B,-,B,B,A,A
S21_2054763,,-,B,A,B,A,A,B,A,A,B,B,B,A,B,A,B,A,A,A,A,B,A,B,A,A,B,A,B,A,A,B,B,A,A,B,B,B,B,B,A,A,B,B,A,B,B,A,A,A,A,A,B,B,A,B,A,B,A,A,A,A,A,B,B,B,B,A,B,B,A,B,A,A,A,A,B,A,A,-,-,A,A,B,A,A,A,B,A,B,A,A,B,A,B,A,A,A,A,B,B,B,B,B,B,A,A,A,A,A,A,B,B,A,B,A,B,A,A,B,B,A,A,A,A,A,B,B,B,B,A,A,A,B,B,A,A,A,B,A,B,-,B,-,A,B,A,B,B,-,A,A,-,A,A,B,B,A,A,B,B,A,B,A,B,-,B,B,A,A
S21_2065183,,-,B,-,B,A,A,B,A,A,A,B,B,A,B,A,B,A,A,A,A,B,A,-,A,A,B,A,-,A,A,B,B,A,A,B,B,B,B,B,A,A,B,B,A,-,B,A,A,A,A,A,B,B,A,B,A,B,A,A,A,A,A,-,B,B,-,A,B,B,A,B,A,A,A,A,B,A,A,-,-,A,A,B,A,A,A,B,A,B,A,A,B,A,B,A,A,A,A,B,B,B,B,B,B,A,A,A,A,A,A,B,-,A,B,A,B,A,A,B,B,A,A,A,A,A,B,B,-,B,A,A,A,-,B,A,A,A,-,A,B,-,B,-,A,-,A,B,B,-,A,A,B,A,A,B,B,A,-,B,B,A,B,A,B,-,B,B,A,-
S21_2109400,,-,B,-,B,A,A,B,A,A,A,B,B,A,B,A,B,A,A,A,A,B,A,B,A,A,B,A,-,A,A,B,B,A,A,B,B,B,B,B,A,A,B,B,A,B,B,A,A,A,A,A,B,-,A,B,A,B,A,A,A,A,A,B,B,B,B,A,B,B,A,B,A,A,-,B,B,A,A,-,B,A,A,B,A,A,A,B,A,B,A,A,B,A,B,A,A,A,A,B,B,B,B,B,B,A,A,A,A,A,A,B,-,A,B,A,B,A,A,B,B,A,A,A,A,A,B,B,B,B,A,B,A,B,B,A,A,A,B,A,A,-,B,-,A,B,A,B,B,-,A,A,-,A,A,B,B,A,A,B,B,A,B,A,B,-,B,B,A,A
S21_2112753,,-,B,-,B,A,A,B,A,A,A,B,B,A,B,A,B,A,A,A,A,B,A,B,A,A,B,A,-,A,A,B,B,A,A,B,B,B,B,B,A,A,B,B,A,B,B,A,A,A,A,A,B,-,A,B,A,B,A,A,A,A,A,B,B,B,B,A,B,B,A,B,A,A,-,B,B,A,A,B,B,A,A,B,A,A,A,B,A,B,A,A,B,A,B,A,A,A,A,B,B,B,B,B,B,A,A,A,A,A,A,B,-,A,B,A,B,A,A,B,B,A,A,A,A,A,B,B,B,B,A,B,A,B,B,A,A,A,B,A,A,-,B,-,A,B,A,B,B,-,A,A,B,A,A,B,B,A,A,B,B,A,B,A,B,-,B,B,A,A
S21_2155944,,-,B,-,B,A,A,B,A,A,A,B,B,A,B,A,B,A,A,A,A,B,A,B,A,A,B,A,-,A,A,B,B,A,A,B,B,B,B,B,A,A,B,B,A,B,B,A,A,A,A,A,B,-,A,B,A,B,A,A,A,A,A,B,B,B,B,A,B,B,A,B,A,A,B,B,B,A,A,B,-,A,A,B,A,A,A,B,A,B,A,A,B,A,B,A,A,A,A,B,B,B,B,B,B,A,A,A,A,A,A,B,-,A,B,A,B,A,A,B,B,A,A,A,A,A,B,B,B,B,A,B,A,B,B,A,A,A,B,A,A,-,B,-,A,B,A,B,B,-,A,A,-,A,A,B,B,A,A,B,B,A,B,A,B,-,B,B,A,A
S21_2163289,,-,B,-,B,A,A,B,A,A,A,B,B,A,B,A,B,A,A,A,A,B,A,B,A,A,B,A,B,A,A,B,B,A,A,B,B,B,B,B,A,A,B,B,A,B,B,A,A,A,A,A,B,-,A,B,A,B,A,A,A,A,A,B,B,B,B,A,B,B,A,B,A,A,-,B,B,A,A,B,-,A,A,B,A,A,A,B,A,B,A,A,B,A,B,A,A,A,A,B,B,B,B,B,B,A,A,A,A,A,A,B,-,A,B,A,B,A,A,B,B,A,A,A,A,A,B,B,B,B,A,B,A,B,B,A,A,A,B,-,A,-,B,-,A,B,A,B,B,-,A,A,-,A,A,B,B,A,A,B,B,A,B,A,B,-,B,B,A,A
S21_2168768,,-,B,-,B,A,A,B,A,A,A,B,B,A,B,A,B,A,A,A,A,B,A,-,A,A,B,A,-,A,A,B,B,A,A,B,B,B,B,B,A,A,B,B,A,B,B,A,A,A,A,A,B,-,A,B,A,B,A,A,A,A,A,B,B,B,B,A,B,B,A,B,A,A,-,B,B,A,A,B,B,A,A,B,A,A,A,B,A,B,A,A,B,A,B,A,A,A,A,B,B,B,B,B,B,A,A,A,A,A,A,B,-,A,B,A,B,A,A,B,B,A,A,A,A,A,B,B,B,B,A,B,A,B,B,A,A,A,B,-,A,-,B,-,A,B,A,B,B,-,A,A,-,A,A,B,B,A,A,B,B,A,B,A,B,B,B,B,A,A
S21_2169945,,-,B,-,-,-,A,B,A,A,A,B,-,A,B,-,B,A,A,A,A,-,A,-,A,A,B,A,B,A,A,B,B,A,A,B,B,B,B,B,-,A,B,B,A,B,B,A,A,A,A,A,B,B,A,B,A,B,A,A,A,A,A,-,B,B,-,A,B,B,A,B,A,A,-,B,B,A,A,B,-,-,A,B,A,-,-,-,A,B,A,A,B,-,-,A,A,A,A,B,-,B,B,B,B,A,A,A,A,A,A,B,-,A,B,A,-,A,A,-,-,A,A,A,A,A,B,B,B,-,-,B,A,B,-,A,-,A,B,-,A,-,B,-,A,B,A,B,B,-,A,A,B,A,A,B,B,A,-,B,B,A,B,A,B,-,B,B,A,A
S21_2182200,,-,B,-,B,A,A,B,A,A,A,B,B,A,B,A,B,A,A,A,A,B,A,B,A,A,B,A,-,A,A,B,B,A,A,B,B,B,B,B,A,A,B,B,A,B,B,A,A,A,A,A,B,-,A,B,A,B,A,A,A,A,A,B,B,B,B,A,B,B,A,B,A,A,B,B,B,A,A,B,-,A,A,B,A,A,A,B,A,B,A,A,B,A,B,A,A,A,A,B,B,B,B,B,B,A,A,A,A,A,A,B,B,A,B,A,B,A,A,B,B,A,A,A,A,A,B,B,B,B,A,B,A,B,B,A,A,A,B,A,A,-,B,-,A,B,A,B,B,-,A,A,-,A,A,B,B,A,A,B,B,A,B,A,B,-,B,B,A,A
S21_2185247,,-,B,-,B,A,A,B,A,A,A,B,B,A,B,A,B,A,A,A,A,B,A,-,A,A,B,A,-,A,A,B,B,A,A,B,B,B,B,B,A,A,B,B,A,B,B,A,A,A,A,A,B,-,A,B,A,B,A,A,A,A,A,B,B,B,B,A,B,B,A,B,A,A,B,B,B,A,A,B,-,A,A,B,A,A,A,B,A,B,A,A,B,A,B,A,A,A,A,B,B,B,B,B,B,A,A,A,A,A,A,B,-,A,B,A,B,A,A,B,B,A,A,A,A,A,B,B,B,B,A,B,A,B,B,A,A,A,B,A,A,-,B,-,A,B,A,B,B,-,A,A,-,A,A,B,B,A,A,B,B,A,B,A,B,-,B,B,A,A
S21_2199973,,-,B,-,B,A,A,B,A,A,A,B,-,A,B,A,B,-,A,A,A,B,A,-,A,A,-,A,A,A,A,B,-,A,A,B,B,B,-,B,A,A,B,B,A,-,-,A,A,A,-,A,B,-,A,B,A,B,A,A,A,A,A,-,B,B,B,A,-,B,A,B,A,A,-,B,-,A,A,B,B,A,A,B,A,A,A,B,A,B,A,-,B,A,B,-,A,A,A,B,-,B,B,B,B,A,A,-,A,-,A,B,-,A,B,A,-,A,A,B,-,A,A,A,A,A,B,B,B,-,-,B,A,B,B,A,-,A,B,-,A,A,B,-,A,B,A,B,B,-,A,A,-,A,A,B,B,A,-,B,B,A,B,A,B,-,B,B,A,A
S21_2215978,,B,B,-,B,A,A,B,A,A,A,B,B,A,B,A,B,A,A,A,A,B,A,B,A,A,B,A,-,A,A,B,B,A,A,B,B,B,B,B,A,A,B,B,A,B,B,A,A,A,A,A,B,-,A,B,A,B,A,A,A,A,A,B,B,B,B,A,B,B,A,B,A,A,B,B,B,A,A,B,B,A,A,B,A,A,A,B,A,B,A,A,B,A,B,A,A,A,A,B,B,B,B,B,B,A,A,A,A,A,A,B,-,A,B,A,B,A,A,B,B,A,A,A,A,A,B,B,B,B,A,B,A,B,B,A,A,A,B,-,A,-,B,-,A,B,A,B,B,-,A,A,-,A,A,B,B,A,A,B,B,A,B,A,B,B,B,B,A,A
S21_2217120,,-,B,-,B,A,A,B,A,A,A,B,-,A,B,A,B,A,A,A,A,B,A,B,A,A,B,A,-,A,A,B,B,A,A,B,B,B,B,B,A,A,B,B,A,B,B,A,A,A,A,A,B,-,A,B,A,B,A,A,A,A,A,B,B,B,B,A,B,B,A,B,A,A,B,B,B,A,A,B,-,A,A,B,A,A,A,B,A,B,A,A,B,A,B,A,A,A,A,B,B,B,B,B,B,A,A,A,A,A,A,B,-,A,B,A,B,A,A,B,B,A,A,A,A,A,B,B,B,B,A,B,A,B,B,A,A,A,B,-,A,-,B,-,A,B,A,B,B,-,A,A,-,A,A,B,B,A,A,B,B,A,B,A,B,-,B,B,A,A
S21_2248455,,-,B,-,B,A,A,B,A,A,A,B,B,A,B,A,B,A,A,A,A,B,A,B,A,A,B,A,-,A,A,B,B,A,A,B,B,B,-,B,A,A,B,B,A,B,B,A,A,A,A,A,B,-,A,B,A,B,A,A,A,A,A,B,B,B,B,B,B,B,A,B,A,A,B,B,B,A,A,B,-,A,A,B,A,B,A,B,B,B,A,A,B,A,B,B,A,A,A,B,B,B,B,B,B,A,A,A,A,A,A,B,-,A,B,A,B,A,A,B,B,A,A,-,A,A,B,B,B,B,A,B,A,B,B,A,-,A,B,-,A,-,B,-,A,B,A,B,B,-,A,A,A,A,A,B,B,A,A,B,B,A,B,A,B,-,B,B,A,A
S21_2257460,,B,B,-,B,A,A,B,A,A,A,B,-,A,B,A,B,A,A,A,A,B,A,B,A,A,B,A,-,A,A,B,B,A,A,B,B,B,B,B,A,A,B,B,A,B,B,A,A,A,A,A,B,-,A,B,A,B,A,A,A,A,A,-,B,B,B,B,B,B,A,B,A,A,-,B,B,A,A,B,B,A,A,B,A,B,A,B,B,B,A,A,B,A,B,B,A,A,A,B,B,B,B,B,B,A,A,A,A,A,A,B,B,A,B,A,B,A,A,B,B,A,A,-,A,A,B,B,B,B,A,B,A,B,B,A,A,A,B,A,A,-,B,-,A,B,A,B,B,-,A,A,B,A,A,B,B,A,A,B,B,A,B,A,B,-,B,B,A,A
S21_2327434,,-,B,-,-,A,A,-,A,A,A,B,-,A,B,-,B,A,A,B,A,B,A,-,A,A,B,A,-,A,A,B,-,-,A,B,-,B,B,B,A,A,B,-,A,-,B,-,A,A,A,A,B,B,A,B,A,B,A,A,A,A,A,B,B,A,B,B,B,B,A,B,-,A,-,B,B,A,A,B,-,A,A,B,A,-,A,B,B,B,A,-,B,A,B,B,A,A,A,B,B,B,B,B,B,A,-,A,-,A,A,B,-,A,B,A,B,A,A,B,B,A,A,-,A,A,B,B,B,B,A,B,A,B,B,A,A,A,-,A,A,-,B,-,A,B,A,B,B,-,A,A,B,A,A,B,B,A,-,B,B,A,B,A,B,-,B,B,A,A
S21_2335345,,-,B,-,B,A,A,B,A,A,A,B,B,A,B,A,B,A,A,B,A,B,A,B,A,A,B,A,-,A,A,B,B,A,A,B,B,B,B,B,A,A,B,B,A,B,B,A,A,A,A,A,B,-,A,B,A,B,A,A,A,A,A,B,B,A,B,B,B,B,A,B,A,A,B,B,B,A,A,B,-,A,A,B,A,B,A,B,B,B,A,A,B,A,B,B,A,A,A,B,B,B,B,B,B,A,A,A,A,A,A,B,B,A,B,A,B,A,A,B,B,A,A,-,A,A,B,B,B,B,A,B,A,B,B,A,A,A,B,-,A,-,B,-,A,B,A,B,B,-,A,A,-,A,A,B,B,A,A,B,B,A,B,A,B,-,B,B,A,A
S21_2356176,,-,B,-,B,A,A,B,A,A,A,B,B,A,B,-,B,A,A,B,A,B,A,-,A,A,B,A,-,A,A,B,B,A,A,B,B,B,-,B,A,A,B,B,A,B,B,A,A,A,A,A,B,-,A,B,A,B,A,A,A,A,-,B,B,A,B,B,B,B,A,B,A,A,B,B,B,A,A,B,-,A,A,B,A,B,A,B,B,B,A,A,B,A,B,B,A,A,A,B,B,B,B,B,B,A,A,A,A,A,A,B,B,A,B,A,B,A,A,B,B,A,A,-,A,A,B,B,B,B,A,B,A,B,B,A,A,A,B,-,A,-,B,-,A,B,A,B,B,-,A,A,-,A,A,B,B,A,A,B,B,A,B,A,B,-,B,B,A,A
S21_2520689,,-,B,-,B,A,A,B,A,A,A,B,B,A,B,A,B,A,A,B,A,B,A,-,A,A,B,A,-,A,A,B,B,A,A,B,B,B,B,B,A,A,B,B,A,B,B,A,A,A,A,A,B,-,A,B,A,B,A,A,A,A,A,-,B,A,B,B,B,B,A,B,A,A,B,B,B,A,A,B,A,A,A,B,A,B,A,B,B,B,A,A,B,A,B,B,A,A,A,B,B,B,B,B,B,A,A,A,A,A,A,B,-,A,B,A,B,A,A,B,B,A,A,A,A,A,B,B,B,B,A,B,A,B,B,A,A,A,B,A,A,-,B,-,A,B,A,B,B,-,A,A,-,A,A,B,B,A,A,B,B,A,B,A,B,-,B,B,A,A
S22_10632,,-,A,-,B,A,B,-,B,B,B,B,B,B,-,A,B,B,B,B,B,A,A,B,A,B,B,B,A,B,B,B,A,B,A,B,B,B,-,A,A,A,A,A,B,-,A,A,B,A,B,A,A,B,A,A,B,B,A,B,B,B,A,-,A,A,A,B,B,B,A,A,A,A,-,B,A,A,A,B,-,B,A,B,A,B,A,B,B,A,B,B,B,A,B,B,B,B,A,A,A,B,A,A,B,A,A,B,B,B,A,A,-,A,A,A,A,A,A,B,B,B,B,B,B,B,A,-,A,B,B,A,B,A,A,A,-,A,A,-,B,-,A,-,A,-,A,A,B,-,A,A,A,A,B,B,B,A,B,B,A,B,A,A,A,-,A,-,B,B
S22_135705,,-,A,-,B,A,B,B,B,B,B,B,B,B,-,A,B,A,B,B,B,A,A,-,A,B,B,B,A,B,B,B,B,A,A,B,B,B,A,A,A,A,A,A,B,A,A,A,B,A,B,A,A,B,A,A,B,B,A,B,B,B,A,A,A,A,A,B,B,B,A,B,A,A,B,B,A,A,A,B,B,B,A,B,A,B,A,B,B,A,B,B,B,A,B,B,B,B,A,A,A,B,A,A,B,A,A,B,B,B,A,A,-,A,A,A,A,A,A,B,B,B,B,B,B,B,A,-,A,B,B,A,B,A,A,A,A,A,A,-,B,-,A,-,A,-,A,A,B,-,A,A,A,A,B,B,B,A,B,B,A,B,A,A,A,-,A,B,B,B
S22_150723,,-,A,-,B,A,B,B,B,B,B,B,B,B,-,A,B,A,B,B,B,A,A,B,A,B,B,B,A,B,B,B,B,A,A,B,B,B,-,A,A,A,A,A,B,-,A,A,B,A,B,A,A,B,A,A,B,B,A,B,B,B,A,A,A,A,A,B,B,B,A,B,A,A,-,B,A,A,A,B,-,B,A,B,A,B,A,B,B,A,B,B,B,A,B,B,B,B,A,A,A,B,A,A,B,A,A,B,B,B,A,A,-,A,A,A,-,A,A,B,B,B,B,B,B,B,A,-,-,-,B,A,B,A,A,A,-,A,A,B,B,-,A,-,A,A,A,A,B,-,A,A,A,A,B,B,B,A,B,B,A,B,A,A,A,-,A,B,B,B
S22_391388,,-,A,-,B,-,B,-,B,B,B,B,-,B,-,A,B,A,-,B,B,A,A,-,B,B,B,B,-,B,B,B,B,-,B,B,B,B,A,A,A,A,B,A,B,-,A,A,B,A,B,A,A,B,A,A,B,B,A,B,B,B,A,-,A,A,A,B,B,B,A,B,A,A,-,B,A,A,A,B,-,B,A,B,A,B,-,A,-,A,B,B,A,A,B,B,B,B,A,A,A,B,A,A,B,A,A,B,B,B,A,A,-,A,A,B,-,A,A,B,-,B,B,B,B,A,A,-,A,B,B,A,B,A,A,A,A,A,A,-,B,-,A,-,A,A,A,A,B,-,A,A,A,A,B,B,B,A,-,B,A,B,A,A,A,-,A,B,B,B
S22_406478,,-,A,-,B,-,B,B,B,B,B,B,-,B,A,-,B,A,B,B,B,A,A,-,B,B,B,B,A,B,B,B,B,-,B,B,B,B,-,A,A,A,B,A,B,-,A,A,B,A,B,A,-,B,A,-,B,B,-,B,B,B,A,-,A,A,A,B,B,B,A,B,A,A,-,B,A,A,A,B,-,B,A,B,A,B,A,-,B,A,B,B,A,A,B,B,B,B,A,A,A,B,A,-,B,A,A,B,B,B,A,A,-,A,A,-,A,A,A,B,B,B,B,B,B,-,A,-,A,-,B,A,B,A,A,A,-,A,A,-,B,-,A,-,A,-,A,A,B,-,A,A,-,A,B,B,B,A,B,B,A,B,A,A,A,-,A,B,B,B
S22_427714,,-,A,-,B,A,B,B,B,B,B,B,B,B,-,A,B,A,B,B,B,A,A,-,B,B,B,B,A,B,B,B,B,A,B,B,B,B,A,A,A,A,B,A,B,A,A,A,B,A,B,A,A,B,A,A,B,B,A,B,B,B,A,-,A,A,A,B,B,B,A,B,A,A,-,B,A,A,A,B,-,B,A,B,A,B,A,A,B,A,B,B,A,A,B,B,B,B,A,A,A,B,A,A,B,A,A,B,B,B,A,A,A,A,A,A,A,A,A,B,B,B,B,B,B,A,A,-,A,B,B,A,B,A,A,A,A,A,A,B,B,-,A,-,A,A,A,A,B,-,A,A,A,A,B,B,B,A,B,B,A,B,A,A,A,-,A,B,B,B
S22_488196,,-,A,-,B,A,B,B,B,B,-,B,B,B,A,-,B,A,B,B,B,A,A,-,B,B,B,B,-,B,B,B,B,A,B,B,B,B,A,A,A,A,B,A,B,A,A,A,B,A,B,A,A,-,A,A,B,B,A,B,B,B,A,A,A,A,A,A,B,B,A,B,A,A,-,B,A,A,A,B,B,B,A,B,A,B,A,A,B,A,B,B,A,A,B,A,B,B,A,A,A,B,A,A,B,A,A,B,B,B,A,A,-,A,A,A,A,A,A,B,B,B,B,B,B,A,A,A,A,B,B,A,B,A,A,A,A,A,A,-,B,B,A,-,A,A,A,A,B,-,A,A,A,A,B,B,B,A,B,B,A,B,A,A,A,-,A,B,B,B
S22_550710,,-,A,-,B,A,B,B,B,B,B,B,B,B,A,-,B,A,B,B,B,A,A,-,B,B,B,B,-,B,B,B,B,A,B,B,B,B,-,A,A,A,B,A,B,-,A,A,B,A,B,A,A,B,A,A,B,B,A,B,B,B,A,-,A,A,A,A,B,B,A,B,A,A,B,B,A,A,A,B,B,B,A,B,A,B,A,-,B,A,B,B,A,A,B,A,B,B,A,A,A,B,A,A,B,A,A,B,B,B,A,A,-,A,A,A,-,A,A,B,B,B,B,B,B,B,A,-,A,-,B,A,B,A,A,A,-,A,A,-,B,-,A,-,A,A,A,A,B,-,A,A,A,A,B,B,B,A,B,B,A,B,A,A,A,-,A,B,B,B
S22_583530,,-,A,-,B,A,B,B,B,B,B,B,-,B,-,A,B,A,B,B,B,A,A,B,B,B,B,B,A,B,B,B,B,A,B,B,B,B,A,A,A,A,B,A,B,A,A,A,B,B,B,A,A,B,A,A,B,B,A,B,B,B,A,A,A,A,A,A,B,B,A,B,A,A,B,B,A,A,A,B,-,B,A,B,A,-,A,A,A,A,B,B,A,A,B,A,B,B,A,A,A,B,A,A,B,A,A,B,B,B,A,A,-,A,A,A,A,A,A,B,B,B,B,B,B,B,A,-,A,B,B,A,B,A,A,A,A,A,A,B,B,-,A,-,A,A,A,A,B,-,A,A,A,A,B,B,B,A,B,B,A,B,A,A,A,B,A,B,B,B
S22_584633,,-,A,-,B,-,B,B,B,B,B,B,-,B,B,A,B,A,B,B,B,A,A,B,B,B,B,B,A,B,B,B,B,A,B,B,B,B,A,A,A,A,B,A,B,A,A,A,B,B,B,A,A,B,A,A,B,B,A,B,B,B,A,A,A,A,A,A,B,B,A,B,A,A,-,B,A,A,A,B,-,B,A,B,A,B,A,A,B,A,B,B,A,A,B,A,B,B,A,A,A,B,A,A,B,A,A,B,B,B,A,A,-,A,A,A,A,A,A,B,B,B,B,B,B,B,A,-,A,B,B,A,B,A,A,-,A,A,A,-,B,-,A,-,A,A,A,A,B,-,A,A,A,A,B,B,B,A,B,B,A,B,A,A,A,-,A,B,B,B
S22_588643,,-,A,-,B,A,B,B,B,B,B,B,-,B,-,A,B,A,B,B,B,A,A,-,B,B,B,B,A,B,B,B,B,A,B,B,B,B,A,A,A,A,B,A,B,-,A,A,B,B,B,A,A,B,A,A,B,B,A,B,B,B,A,-,A,A,A,A,B,B,A,B,A,A,B,B,A,A,A,B,B,B,A,B,A,-,A,A,-,A,B,B,A,A,B,A,B,B,A,A,A,B,A,A,B,A,A,B,B,B,A,A,A,A,A,A,A,A,A,B,-,B,B,B,B,B,A,-,A,B,B,A,B,A,A,A,A,A,A,-,B,-,A,-,A,A,A,A,B,-,A,A,A,A,B,B,B,A,B,B,A,B,A,A,A,-,A,B,B,B
S22_610059,,-,A,-,B,A,B,-,A,B,-,B,-,B,A,A,B,A,B,B,B,A,A,-,B,B,B,B,A,B,B,B,B,A,B,B,B,-,A,B,A,A,B,A,B,A,A,A,B,-,B,A,A,B,A,A,B,B,A,B,B,B,A,A,A,A,A,A,B,B,A,B,A,A,-,B,A,A,A,B,-,B,A,B,A,A,A,A,A,A,B,B,A,A,B,A,B,B,A,A,A,B,A,-,B,A,A,B,B,B,A,A,-,A,A,A,A,A,A,B,-,B,B,-,B,B,A,A,A,-,B,A,-,A,A,A,-,A,A,B,B,A,A,-,A,A,A,A,B,-,A,A,A,A,B,B,B,A,-,-,A,B,A,A,A,-,A,B,B,B
S22_612493,,-,A,-,B,A,B,B,B,B,B,B,B,B,A,A,B,A,B,B,B,-,A,B,B,B,B,B,A,B,B,B,B,A,B,B,B,B,A,B,A,A,B,A,B,A,A,A,B,B,B,A,A,B,-,A,B,B,A,B,B,B,A,A,A,A,A,A,B,B,A,B,A,A,-,B,A,A,A,B,-,B,-,B,A,A,A,A,-,A,B,B,A,A,B,A,B,B,A,A,A,B,A,B,B,A,A,B,B,B,A,A,A,A,A,A,A,A,A,B,B,B,B,B,B,B,A,-,A,B,B,A,B,A,A,A,A,A,-,B,B,-,A,-,A,A,A,A,B,-,A,A,A,A,B,B,B,A,B,B,A,B,A,A,A,-,A,B,B,B
S22_667489,,-,A,-,B,A,B,B,B,B,B,B,B,B,-,A,B,A,-,B,B,A,A,-,B,B,B,B,A,B,B,B,B,-,B,B,B,B,-,B,A,A,B,A,B,-,A,A,B,B,B,A,A,B,A,A,B,B,A,B,B,B,A,-,A,A,A,A,B,B,A,B,A,A,-,B,A,A,A,B,B,B,A,B,A,A,A,A,A,A,B,-,A,A,B,A,B,B,A,A,A,B,A,B,B,A,A,B,B,B,A,A,-,A,A,A,A,A,A,B,-,B,B,B,B,B,A,-,A,B,B,A,B,A,A,A,A,A,A,-,B,-,A,-,A,A,A,A,B,-,A,A,A,A,B,B,B,A,-,B,A,B,A,A,A,-,A,B,B,B
S22_743820,,-,A,-,B,A,B,B,B,B,B,B,B,B,A,A,B,A,B,B,B,A,A,-,B,B,B,B,A,B,B,B,B,A,B,B,B,B,A,B,A,A,B,A,B,A,A,A,B,B,B,A,A,B,A,A,B,B,A,B,B,B,A,A,A,A,A,A,B,B,A,B,A,A,B,B,A,A,A,B,-,B,A,B,A,A,A,A,-,A,B,B,A,A,B,A,B,B,A,A,A,B,A,B,B,A,A,-,B,B,A,A,A,A,A,A,A,A,A,B,B,B,B,B,B,B,A,-,A,B,B,A,B,A,A,A,A,A,A,B,B,-,A,-,A,A,A,A,B,-,A,A,A,A,B,B,B,A,B,B,A,B,A,A,A,-,A,B,B,B
S22_811466,,-,A,-,B,A,B,-,B,B,B,B,B,B,-,A,B,A,B,B,B,A,A,-,B,B,B,B,-,B,-,B,-,-,B,B,B,B,-,B,A,A,B,A,B,A,-,A,B,B,-,A,A,B,B,A,B,B,A,-,B,B,A,-,A,A,A,A,B,B,A,B,-,A,-,B,A,A,A,B,-,B,A,B,A,A,A,-,A,A,B,B,A,A,B,A,B,B,A,A,-,B,B,B,B,A,-,B,B,B,A,A,-,A,A,A,A,A,A,B,B,B,B,B,B,B,A,-,A,-,B,A,B,A,A,A,A,A,A,-,B,A,A,-,A,A,A,A,B,-,A,A,-,A,B,B,B,A,-,B,A,B,A,A,A,-,A,B,B,-
S22_815317,,-,A,-,-,A,B,B,B,-,-,B,B,B,A,-,B,-,B,B,B,A,A,-,B,B,B,B,A,B,B,-,B,A,B,B,B,B,A,B,A,-,B,A,B,A,A,A,B,B,-,A,A,B,-,A,B,B,A,B,B,B,A,-,A,-,A,A,B,B,A,B,A,A,-,-,A,A,A,B,-,B,A,-,A,A,A,A,A,A,B,B,-,A,B,A,B,B,A,A,A,-,B,B,B,A,A,-,B,-,A,A,-,A,A,A,A,A,A,B,B,B,B,-,B,B,A,-,A,B,B,A,B,A,A,A,A,A,A,-,B,-,A,-,A,A,A,A,B,-,A,A,A,A,B,B,B,A,B,B,A,B,A,A,A,-,A,B,B,B
S22_959926,,-,A,-,B,-,B,B,B,B,B,B,-,B,A,A,B,A,B,B,B,-,A,-,B,B,B,B,A,B,B,B,B,A,B,B,B,B,-,B,A,A,B,A,B,-,A,A,B,B,B,A,A,B,B,A,B,B,A,B,B,B,A,-,A,A,-,A,B,B,A,B,A,A,-,B,A,A,A,B,-,B,A,B,A,A,A,A,-,A,B,-,A,A,B,A,B,B,A,A,A,B,B,B,B,A,A,B,B,B,B,-,A,A,A,A,A,A,A,A,B,B,B,A,B,B,A,-,A,B,B,A,B,A,A,A,-,A,A,-,B,-,A,-,A,A,A,A,A,-,A,A,A,A,B,B,B,A,B,B,A,B,A,A,A,-,A,B,B,A
S23_100289,,-,B,-,A,A,A,B,B,A,A,B,B,B,B,A,B,A,A,B,A,A,B,-,A,A,B,B,A,B,B,A,B,B,A,B,A,A,B,A,A,B,B,A,A,A,B,B,B,A,B,B,B,A,B,A,B,A,B,A,A,A,A,A,B,B,B,B,B,B,A,B,A,A,-,B,B,B,A,A,-,A,A,A,A,A,B,A,A,A,A,B,B,A,B,B,B,B,A,B,B,B,A,A,A,B,A,A,A,B,A,B,-,A,B,A,A,B,B,B,B,A,B,B,B,A,A,A,B,A,A,B,B,B,B,B,-,A,A,B,B,-,A,-,B,A,A,A,B,-,B,B,-,A,B,A,A,A,B,A,B,A,B,B,A,-,B,A,B,B
S23_113768,,B,B,-,A,A,A,B,B,A,A,B,B,B,B,A,B,A,A,B,A,A,B,-,A,A,B,B,A,B,B,A,B,B,A,B,A,A,B,A,A,B,B,A,A,A,B,B,B,A,B,B,B,A,B,A,B,A,B,A,A,A,A,A,B,B,B,B,B,B,A,B,A,A,-,B,B,B,A,A,-,A,A,A,A,A,B,A,A,A,A,B,B,B,B,B,B,B,A,B,B,B,A,A,A,B,A,A,A,B,A,B,-,A,B,A,A,B,B,B,B,A,B,B,B,A,A,A,B,A,A,B,B,B,B,B,A,A,A,B,B,-,A,-,B,A,A,A,B,-,B,B,A,A,B,A,A,A,B,A,B,A,B,B,A,A,-,A,B,B
S23_329752,,-,B,-,A,A,A,B,B,A,A,B,B,B,B,B,B,A,A,B,A,A,B,A,A,A,B,B,A,B,B,A,B,B,A,B,A,A,B,A,A,B,B,A,A,A,B,B,B,B,B,B,B,A,B,A,B,B,B,A,A,A,A,-,B,B,B,B,B,B,-,B,A,A,-,B,B,B,A,A,A,A,A,A,A,A,B,A,A,A,A,B,B,B,B,B,A,B,-,B,B,B,A,A,A,B,A,A,A,B,A,B,-,A,B,A,A,B,B,B,B,A,B,B,B,A,A,A,B,A,A,B,B,B,B,B,A,A,A,B,B,-,A,-,B,-,A,A,B,-,B,B,A,A,B,A,A,A,B,A,B,A,B,B,A,-,A,A,B,B
S23_347544,,-,B,-,A,A,A,B,B,B,A,B,B,B,B,B,B,A,A,B,A,A,B,-,A,A,B,B,A,B,B,A,B,B,A,B,A,A,B,A,A,B,B,A,A,A,B,B,B,B,B,B,B,A,B,A,B,B,B,A,A,A,A,A,B,B,B,B,B,B,-,B,A,A,B,B,B,B,A,A,-,A,A,A,A,A,B,A,A,A,A,B,B,B,B,B,A,B,-,B,B,B,A,A,A,B,A,A,A,B,A,B,-,A,B,A,A,B,B,B,B,A,B,B,B,A,A,A,B,A,A,B,B,B,B,B,A,A,A,B,B,-,A,B,B,A,A,A,B,-,B,B,A,A,B,A,A,A,B,A,B,A,B,B,A,-,A,A,B,B
S23_484065,,-,B,-,A,A,A,B,B,B,A,B,B,B,B,B,B,A,A,B,A,A,B,A,A,A,B,B,A,B,B,A,B,B,A,B,A,A,B,A,A,B,B,A,A,A,B,B,B,A,B,B,B,A,B,A,B,B,B,A,A,A,A,A,B,B,B,B,B,B,-,B,A,A,B,B,B,B,A,A,A,A,A,A,A,A,B,A,A,A,A,B,B,B,B,B,A,B,-,B,B,B,A,A,A,B,A,A,A,B,A,B,B,A,B,A,A,B,B,B,B,A,B,B,B,A,A,A,B,A,A,B,B,B,B,B,A,A,A,B,B,-,A,-,B,A,A,A,B,-,B,B,A,A,B,A,A,A,B,A,B,A,B,B,A,A,A,A,B,B
S23_647439,,-,B,-,A,-,A,B,B,B,A,B,B,B,B,B,B,A,A,B,A,-,B,-,A,A,B,B,A,B,B,-,B,-,A,B,A,A,B,A,A,B,B,A,A,-,B,B,B,A,-,B,B,A,B,A,B,B,B,A,A,A,A,A,B,B,B,B,B,B,-,B,A,A,B,B,B,B,A,A,-,A,A,A,A,A,B,A,-,A,A,B,B,B,B,B,A,-,A,B,B,B,A,A,A,B,A,A,A,B,A,B,-,A,B,A,A,B,B,B,-,A,B,B,B,A,A,A,B,-,A,B,B,-,B,B,-,A,A,-,B,A,A,-,B,-,A,A,B,-,B,B,A,A,B,A,A,A,B,A,B,A,B,-,A,-,A,A,B,B
S24_207931,,-,-,-,-,A,A,A,B,A,B,B,-,A,A,B,A,A,B,B,B,-,A,A,B,A,A,B,A,B,B,B,A,-,B,B,B,A,A,B,B,B,B,A,A,B,A,B,B,A,B,B,A,B,A,A,B,A,A,A,A,B,A,B,B,A,-,A,A,A,A,A,B,A,-,A,B,B,A,B,-,B,B,A,A,A,B,B,A,-,B,B,B,-,B,A,A,B,A,B,A,B,A,B,A,A,B,A,A,A,A,A,A,A,B,B,B,A,A,B,A,B,A,B,A,B,B,B,B,A,A,-,B,A,A,A,B,B,B,-,B,-,A,-,A,A,A,A,B,-,A,A,A,B,B,B,-,A,A,A,B,A,-,A,B,-,B,A,B,A
S24_243963,,-,B,-,B,A,A,-,B,A,B,B,-,A,-,B,A,A,B,B,B,B,A,-,B,A,B,B,A,B,B,B,A,-,B,B,-,A,A,B,B,B,B,A,A,B,A,B,A,A,B,B,A,B,A,A,B,A,B,A,A,-,A,-,B,A,B,A,A,A,A,A,B,-,-,A,B,B,A,B,-,B,B,A,A,A,B,B,A,-,B,B,B,B,B,A,A,B,A,B,A,B,A,B,A,A,B,B,A,A,A,A,-,A,B,B,B,A,A,B,A,B,B,B,A,B,-,B,B,-,A,-,B,A,A,A,B,B,B,-,B,-,A,-,A,A,A,A,B,-,A,A,A,B,B,B,A,A,A,A,B,B,-,A,B,-,B,A,B,A
S24_245499,,-,-,-,-,A,A,A,B,A,B,B,A,A,A,B,A,A,B,B,B,-,A,-,B,A,B,B,A,B,B,B,A,A,B,B,B,A,A,B,B,B,B,A,A,B,A,B,A,A,B,B,A,B,A,A,B,-,B,A,A,B,A,B,B,A,-,A,A,A,A,A,B,A,B,A,B,B,A,B,-,B,B,A,A,A,B,B,A,-,B,B,B,-,B,A,A,B,A,B,A,B,A,B,A,A,B,B,A,A,A,A,A,A,B,B,B,A,A,B,A,B,B,B,A,B,B,B,B,A,A,-,B,A,A,A,B,B,B,B,B,-,A,-,A,A,A,A,B,-,A,A,A,B,B,B,A,A,A,A,B,B,-,A,B,-,B,A,B,A
S24_257161,,-,-,-,-,A,A,A,B,A,B,B,A,A,A,B,A,A,B,B,B,-,A,A,B,A,B,B,A,B,B,B,A,A,B,B,B,A,A,B,B,B,B,A,A,B,A,B,A,A,B,B,A,B,A,A,B,-,B,A,A,B,A,B,B,A,-,A,A,A,A,A,B,A,-,A,B,B,A,B,-,B,B,A,A,A,B,B,A,-,B,B,B,-,B,A,A,B,A,B,A,B,A,B,A,A,B,B,A,A,A,A,-,A,B,B,B,A,A,B,A,B,B,B,A,B,B,B,B,A,A,-,B,A,A,A,B,B,B,-,B,-,A,-,A,A,A,A,B,-,A,A,A,B,B,B,A,A,A,A,B,B,-,A,B,-,B,A,B,A
S24_277884,,-,B,-,-,A,A,A,B,A,B,B,A,A,A,B,A,A,B,B,B,-,A,-,B,A,B,B,A,B,B,B,A,A,B,B,B,A,A,B,B,B,B,A,A,B,A,B,A,A,B,B,A,B,A,A,B,A,B,A,A,B,A,B,B,A,-,A,A,A,A,A,B,A,-,A,B,B,A,B,-,B,B,A,A,A,B,B,A,-,B,B,B,-,B,A,A,B,A,B,A,B,A,B,A,A,-,B,A,A,A,A,-,A,B,B,B,A,A,B,A,B,B,B,A,B,B,B,B,A,A,B,B,A,A,A,-,B,-,-,B,-,A,-,A,A,A,A,B,-,A,A,A,B,B,B,A,A,A,-,B,B,-,A,B,-,B,A,B,A
S24_294494,,A,-,B,-,A,A,A,B,B,B,B,A,A,A,B,A,A,B,B,B,-,A,A,B,A,B,B,A,B,B,B,A,A,B,B,B,A,A,B,B,B,B,A,A,B,A,B,A,A,B,B,A,B,A,A,B,A,B,A,A,A,A,B,B,A,-,A,A,A,A,A,B,A,B,A,B,B,A,B,-,B,B,A,A,A,B,B,A,-,B,B,B,-,B,A,A,B,A,B,A,B,A,B,A,A,B,B,A,A,A,A,A,A,B,B,B,A,A,B,A,B,B,B,A,B,B,B,B,A,A,-,B,A,A,A,B,B,B,B,B,-,A,-,A,A,A,A,B,-,A,A,A,B,B,B,A,A,A,A,B,B,-,A,B,-,A,A,B,A
S25_27163,,-,B,-,B,B,B,A,B,A,B,B,B,B,A,A,B,A,A,B,A,B,B,-,B,B,A,B,A,A,B,B,A,A,A,-,A,A,B,B,B,B,A,A,A,B,A,B,B,B,A,B,A,B,B,B,B,B,B,B,A,A,B,-,A,B,A,A,A,B,A,B,-,B,-,B,A,B,A,A,-,A,A,B,B,B,B,A,B,A,B,A,B,B,B,-,B,B,A,B,B,A,B,A,A,B,A,A,B,A,B,B,-,A,A,B,B,A,A,A,B,A,A,A,A,B,-,B,B,-,A,B,A,A,A,A,-,B,B,-,A,A,B,-,B,-,A,B,B,-,B,A,-,A,A,A,A,A,B,A,A,B,B,B,A,-,B,A,A,A
S25_47250,,-,B,-,B,B,B,A,B,A,B,B,B,B,A,A,B,A,A,B,A,B,B,-,B,B,A,B,-,A,B,-,A,A,A,A,A,A,B,B,B,B,A,A,A,B,A,B,B,B,A,B,A,B,B,B,B,B,B,B,A,A,B,A,A,B,A,A,A,B,A,B,A,B,B,B,A,B,A,A,B,A,A,B,B,B,B,A,B,A,B,A,B,B,B,A,B,A,A,B,-,A,B,A,A,B,A,A,B,A,B,B,-,A,A,B,B,A,A,A,B,A,A,A,A,B,-,B,B,A,A,B,A,A,A,A,A,B,B,-,A,A,B,-,B,A,A,B,B,-,B,A,A,A,A,A,A,A,B,A,A,B,B,B,A,-,B,A,A,A
S25_53017,,-,B,-,B,B,B,A,B,A,B,B,B,B,A,A,B,A,A,B,A,B,B,A,B,B,A,B,A,A,B,B,A,A,A,A,A,A,B,B,B,B,A,A,A,B,A,B,B,B,A,B,A,B,B,B,B,B,B,B,A,A,B,A,A,B,A,A,A,B,A,B,A,B,B,B,A,B,A,A,B,A,A,B,B,B,B,A,B,A,B,A,B,B,B,A,B,A,A,B,-,A,B,A,A,B,A,A,B,A,B,B,B,A,A,B,B,A,A,A,B,A,A,A,A,B,-,B,B,A,A,B,A,A,A,A,A,B,B,B,A,A,B,-,B,A,A,B,B,-,B,A,A,A,A,A,A,A,B,A,A,B,B,B,A,-,B,A,A,A
S25_131515,,-,B,-,B,-,B,A,B,A,B,B,B,B,A,-,B,A,A,B,A,B,B,-,B,B,A,B,A,A,B,B,A,A,A,A,A,A,B,B,-,B,A,A,A,-,A,B,A,B,A,B,A,B,B,B,B,B,B,B,A,A,B,A,A,B,A,A,A,B,B,B,A,A,-,B,A,B,A,A,-,A,A,B,B,B,B,A,B,A,B,A,B,A,B,A,B,A,B,B,-,A,B,A,A,B,A,A,B,A,B,B,-,A,A,B,B,A,A,A,A,A,A,A,A,B,B,A,B,A,-,B,A,A,A,A,-,B,B,-,A,A,B,-,B,A,A,B,B,-,B,A,A,A,A,A,A,-,B,A,A,B,B,B,A,-,B,A,A,A
S25_234789,,-,B,-,B,B,B,A,B,A,B,B,B,B,A,A,B,-,A,A,A,B,B,-,B,B,A,B,A,A,B,B,A,A,A,A,A,A,B,B,B,B,A,A,A,B,A,B,A,B,A,B,A,B,A,B,B,B,B,B,A,A,B,A,A,B,A,A,A,B,B,B,A,A,-,B,A,B,A,A,-,A,A,B,B,B,B,A,B,A,B,A,B,A,B,A,B,A,B,B,-,A,-,A,A,B,A,A,B,A,B,B,-,A,A,B,B,A,A,A,A,A,A,A,A,B,B,A,B,A,A,B,A,A,A,A,A,B,B,-,A,A,B,-,B,A,A,B,B,-,B,A,A,A,A,A,A,A,-,A,A,B,B,B,A,-,B,A,A,A
S25_249896,,-,B,-,B,-,B,-,B,A,-,B,B,B,A,-,B,B,A,A,A,B,B,-,B,B,A,B,A,A,-,B,A,-,A,A,A,A,-,B,B,B,A,-,A,B,-,B,A,B,A,B,A,B,A,B,B,B,B,B,A,A,B,-,A,B,A,-,A,B,B,B,-,-,-,-,A,B,A,-,-,A,A,B,-,B,B,A,B,A,B,A,B,A,B,A,B,A,B,B,A,A,B,A,A,B,A,A,B,A,B,-,-,A,A,B,B,A,A,A,-,A,A,A,A,B,B,A,B,-,A,B,A,A,A,A,-,B,B,-,A,A,-,-,B,A,A,B,B,-,-,A,A,A,A,-,A,A,-,A,A,B,B,B,A,-,B,A,A,A
S25_253742,,-,B,-,B,B,B,A,B,A,B,B,B,B,A,-,B,-,A,A,A,B,B,-,B,B,A,B,A,A,B,B,A,A,A,A,A,A,-,B,B,B,A,A,A,B,A,B,A,B,A,B,A,B,A,B,B,B,B,B,A,-,B,-,A,B,-,A,A,B,B,B,A,A,-,B,-,B,A,A,-,A,A,B,B,-,B,A,B,A,B,A,-,A,B,A,B,A,B,B,-,-,B,-,A,B,A,A,B,A,B,-,-,A,A,B,-,A,A,A,-,A,A,A,A,B,B,A,B,-,A,B,A,A,A,A,-,B,B,-,A,A,B,-,B,A,A,B,B,-,B,A,A,A,A,A,A,A,B,A,A,B,B,B,A,-,B,A,A,A
S25_263619,,-,B,-,B,B,A,A,B,A,B,B,-,B,A,A,B,-,-,A,-,B,B,-,B,B,A,B,A,A,B,B,-,A,A,A,A,A,-,B,B,B,A,A,A,-,A,B,A,B,A,B,A,B,A,B,B,B,B,B,A,-,B,-,A,B,A,A,A,B,B,B,A,A,-,B,A,B,A,A,-,A,A,B,B,B,B,-,B,A,B,A,B,A,B,A,-,A,B,B,-,A,B,A,A,B,A,A,-,-,B,B,-,A,A,-,B,A,A,A,-,A,A,A,A,B,B,A,B,A,A,B,A,A,A,A,A,B,B,B,A,A,B,-,B,A,A,B,B,-,B,A,A,A,A,A,A,A,B,A,A,B,B,B,A,-,B,A,A,A
S25_288852,,-,B,-,B,-,A,A,B,A,B,B,-,B,A,-,B,-,A,A,A,B,B,-,B,B,A,B,A,A,B,B,A,A,A,A,A,A,B,B,B,B,A,A,A,B,A,B,A,B,A,B,A,B,A,B,B,B,B,B,A,-,B,A,A,B,A,A,A,B,B,B,A,A,A,B,A,B,A,A,-,A,A,B,B,B,B,A,B,A,B,A,B,A,B,A,B,A,B,B,-,A,B,A,A,B,A,A,B,A,A,B,-,A,A,B,B,A,A,A,A,A,A,A,A,B,B,A,B,A,A,B,A,A,A,A,A,B,B,-,A,A,B,-,B,A,A,B,B,-,B,A,A,A,A,A,A,A,B,A,A,B,B,B,A,-,B,A,A,A
S25_340671,,-,B,-,B,B,A,A,B,A,B,B,B,B,A,A,B,-,A,A,A,B,B,-,B,B,A,B,A,A,B,B,A,A,A,A,A,A,B,B,B,B,A,A,A,B,A,B,A,B,A,B,A,B,A,B,B,A,B,B,A,A,B,A,A,B,A,A,A,B,B,B,A,A,A,B,A,B,A,A,B,A,A,B,B,B,B,A,B,A,B,A,B,A,B,A,B,A,B,B,-,A,B,A,A,B,A,A,B,A,A,B,-,A,A,B,B,A,A,A,A,A,A,A,A,B,B,A,B,A,A,B,A,A,A,A,A,B,B,B,A,A,B,-,B,A,A,B,A,B,B,A,A,A,A,A,A,A,B,A,A,B,B,B,A,-,B,A,A,A
S25_377821,,-,B,-,B,B,A,A,B,A,B,B,B,B,A,A,B,-,A,A,A,B,B,-,B,B,A,B,A,A,B,B,A,A,A,A,A,A,B,B,B,B,A,A,A,B,A,B,A,B,A,B,A,B,A,B,B,A,B,B,A,A,B,A,A,B,A,A,A,B,B,B,A,A,-,B,A,B,A,A,-,A,A,B,B,B,B,A,B,A,B,A,B,A,B,A,B,A,B,B,A,A,B,A,A,B,A,A,B,A,A,B,-,B,A,B,B,A,A,A,A,A,A,A,A,B,B,A,B,A,A,B,A,A,A,A,A,B,B,B,A,A,B,-,B,A,A,B,A,-,B,A,A,A,A,A,A,A,B,A,A,B,B,B,A,-,B,A,A,A
S25_389086,,-,B,-,B,B,A,A,B,A,B,B,B,B,A,A,B,-,A,A,A,B,B,-,B,B,A,B,A,A,B,B,A,A,A,A,A,A,B,B,B,B,A,A,A,B,A,B,A,B,A,B,A,B,A,B,B,A,B,B,A,A,B,-,A,B,A,A,A,B,B,B,A,A,-,B,A,B,A,A,-,A,A,B,B,B,B,A,B,A,B,A,B,A,B,A,B,A,B,B,A,A,B,A,A,B,A,A,B,A,A,B,-,B,A,B,B,A,A,A,A,A,A,A,A,B,B,A,B,A,A,B,A,A,A,A,A,B,B,-,A,-,B,-,B,A,A,B,A,-,B,A,A,A,A,A,A,A,B,A,A,B,B,B,A,-,B,A,A,A
S25_447207,,-,A,-,B,B,A,A,B,A,B,B,B,B,A,A,B,-,A,A,A,B,B,A,B,B,A,B,A,A,B,B,A,A,A,A,A,A,B,B,B,B,A,B,A,B,B,B,A,B,A,B,A,B,A,B,B,A,B,B,A,A,B,A,A,B,A,A,A,B,B,B,A,A,A,B,A,B,A,A,-,A,A,B,B,B,B,A,B,A,B,A,B,A,B,A,B,A,B,B,A,A,A,A,A,B,A,A,B,A,A,B,B,B,A,A,B,A,A,A,A,A,B,A,A,B,B,A,B,A,B,B,A,A,A,A,A,B,B,B,A,-,B,-,B,A,A,B,A,-,B,A,A,A,A,A,A,A,B,A,A,B,B,B,A,-,B,A,A,A
S25_454583,,-,A,-,B,B,A,A,B,A,B,B,B,B,A,-,B,-,A,A,A,B,B,-,B,B,A,B,A,A,B,B,A,A,A,A,A,A,B,B,B,B,A,B,A,B,B,B,A,B,A,B,A,B,A,B,B,A,B,B,A,A,B,-,A,B,A,A,A,B,B,B,A,A,A,B,A,B,A,A,-,A,A,B,B,B,B,A,B,A,B,A,B,A,B,A,B,A,B,B,A,A,A,A,A,B,A,A,B,A,A,B,-,B,A,A,B,A,A,A,A,A,B,A,A,B,B,A,B,A,B,B,A,A,A,A,A,B,B,-,A,-,B,-,B,-,A,B,A,-,B,A,A,A,A,A,A,A,B,A,A,B,B,B,A,-,B,A,A,A
S25_458766,,-,A,-,B,B,A,A,B,A,B,B,B,B,A,A,B,-,A,A,A,B,B,-,-,B,A,B,A,A,-,B,A,A,A,A,A,A,-,B,-,B,A,B,A,-,B,B,A,B,A,-,A,B,A,B,B,A,B,B,A,-,B,-,A,B,A,-,A,B,A,B,A,A,-,B,A,B,A,A,-,A,A,B,B,A,-,A,A,A,B,A,B,A,B,A,B,A,-,B,A,A,A,A,A,B,A,A,B,A,A,-,-,B,A,A,B,A,A,A,A,A,B,A,A,B,B,A,B,A,B,B,A,A,A,-,A,B,B,-,A,-,B,-,B,A,A,B,A,-,A,A,A,A,A,A,A,A,B,A,B,B,B,B,A,-,B,A,A,A
S25_460934,,-,A,-,B,-,A,A,B,A,B,B,B,B,A,-,B,-,A,A,A,B,B,-,B,B,A,B,A,-,B,B,A,A,A,A,A,A,-,B,B,B,A,B,A,B,B,B,A,B,A,B,A,B,A,B,B,A,B,B,A,A,B,A,A,B,A,A,A,B,A,B,A,A,-,B,A,B,A,A,-,A,A,B,B,A,B,-,A,A,B,-,B,A,B,A,B,A,-,B,A,A,A,A,A,B,A,-,B,-,A,B,-,B,A,-,-,A,A,A,A,-,B,A,A,B,B,A,B,A,B,B,A,A,A,A,A,B,B,-,A,-,B,-,B,A,A,B,A,-,A,A,A,A,A,A,A,A,B,A,B,B,B,B,A,-,B,A,A,A
S25_463746,,-,A,-,B,B,A,A,B,A,B,B,B,B,A,A,B,-,A,A,A,B,B,A,B,B,A,B,A,A,B,B,A,A,A,A,A,A,B,B,B,B,A,B,A,B,B,B,A,B,A,B,A,B,A,B,B,A,B,B,A,A,B,A,A,B,A,A,A,B,A,B,A,A,A,B,A,B,A,A,-,A,A,B,B,A,B,A,A,A,B,A,B,A,B,A,B,A,-,B,A,A,A,A,A,B,A,A,B,A,A,B,-,B,A,A,B,A,A,A,A,A,B,A,A,B,B,A,B,A,B,B,A,A,A,A,A,B,B,-,A,-,B,-,B,A,A,B,A,-,A,A,A,A,A,A,A,A,B,A,B,B,B,B,A,-,B,A,A,A
S25_476069,,-,A,-,B,B,A,A,B,-,-,B,B,B,-,A,B,-,A,A,A,B,B,-,B,B,A,-,A,A,-,-,A,A,A,A,A,A,B,B,B,B,A,B,A,-,B,B,A,B,A,B,A,B,A,B,B,A,B,B,A,A,B,-,A,-,-,A,A,B,A,B,A,A,-,B,A,B,A,A,-,A,A,B,B,A,B,A,A,A,B,A,B,A,B,A,B,A,A,B,A,A,A,A,A,B,A,A,B,A,A,B,-,B,A,A,B,A,A,A,A,A,B,A,A,-,B,A,B,A,B,B,A,A,A,A,A,B,B,-,A,-,B,-,A,-,A,B,A,-,A,A,-,A,A,A,A,A,-,A,B,B,-,B,A,-,B,-,A,A
S25_508205,,-,A,B,B,B,A,A,B,A,B,B,B,B,A,A,B,-,A,A,A,B,B,-,A,B,A,B,A,A,B,B,A,A,A,A,A,A,B,B,B,B,A,B,A,B,B,B,A,B,A,B,A,B,A,B,B,A,B,B,A,A,B,A,A,B,A,A,A,B,A,B,A,A,A,B,A,B,A,A,B,A,A,B,B,A,B,A,A,A,B,A,B,A,B,A,B,A,-,B,A,A,A,A,A,B,A,A,B,A,A,B,-,B,A,A,B,A,A,A,A,A,B,A,A,B,B,A,B,A,B,B,A,A,A,A,A,B,B,B,A,-,B,-,B,A,A,B,A,-,A,A,A,A,A,A,A,A,B,A,B,B,B,B,A,-,B,A,A,A
S25_530136,,-,A,-,B,B,A,A,B,A,B,B,B,B,A,A,B,-,A,A,A,B,B,-,A,B,A,B,A,A,B,B,A,A,A,A,A,A,B,B,B,B,A,B,A,B,B,B,A,B,A,B,A,B,A,B,B,A,B,B,A,A,B,A,A,B,A,A,A,B,A,B,A,A,-,B,A,B,A,A,B,A,B,B,B,A,B,A,A,A,B,A,B,A,B,A,B,A,-,B,A,A,A,A,A,B,A,A,B,A,B,B,B,B,A,A,B,A,A,A,A,A,B,A,A,B,B,A,B,A,B,B,A,A,A,A,A,B,B,B,A,-,B,-,B,-,A,B,A,-,A,A,A,A,A,A,A,A,B,A,B,B,B,B,A,-,A,A,A,A
S25_541738,,-,A,-,B,B,A,A,B,A,B,B,B,B,A,A,B,-,A,A,A,B,B,-,A,B,A,B,A,A,B,B,A,A,A,A,A,A,B,B,B,B,A,B,A,B,B,B,A,B,A,B,A,B,A,B,B,A,B,B,A,A,B,A,A,B,A,A,A,B,A,B,A,A,A,B,A,B,A,A,B,A,B,B,B,A,B,A,A,A,B,A,B,A,B,A,B,A,-,B,A,A,A,A,A,B,A,A,B,A,B,B,B,B,A,A,B,A,A,A,A,A,B,A,A,B,B,A,B,A,B,B,A,A,A,A,A,B,B,B,A,-,B,-,B,-,A,B,A,-,A,A,A,A,A,A,A,A,B,A,B,B,B,B,A,-,A,A,A,A
S25_666735,,-,A,-,B,B,A,A,B,A,B,B,B,B,A,A,B,B,A,A,A,B,B,-,B,B,A,A,A,A,B,B,A,A,A,A,A,A,B,B,B,B,A,B,A,B,A,B,A,B,A,A,A,B,A,B,B,A,B,B,A,A,B,-,A,B,A,A,A,B,A,B,A,A,-,B,A,B,A,A,A,A,B,B,B,A,B,A,A,A,B,A,B,A,B,A,B,A,-,B,A,A,A,A,A,B,A,A,B,A,B,B,B,B,A,A,B,A,A,A,A,A,B,A,A,A,B,A,A,A,B,B,A,A,A,A,A,B,B,-,A,-,B,-,B,A,A,B,A,-,A,A,A,A,B,A,A,A,B,A,B,B,B,B,A,-,A,A,A,A
S25_688917,,-,A,-,-,-,A,-,B,A,B,B,-,B,A,A,B,-,A,A,A,-,B,-,B,B,A,A,A,A,B,-,A,-,A,A,A,A,B,B,B,B,A,B,A,-,A,-,A,B,-,-,A,B,A,B,B,A,B,B,A,A,B,-,A,B,-,A,A,B,A,B,A,A,A,B,A,B,A,A,-,A,B,B,B,A,-,-,A,A,B,A,B,A,B,A,B,A,-,B,A,A,A,A,A,B,A,A,B,A,B,B,-,B,A,A,-,-,A,A,A,A,B,A,A,A,B,A,A,-,B,B,A,-,A,-,-,B,B,-,A,-,B,-,B,A,A,B,-,-,A,A,A,A,B,A,A,A,B,A,B,B,B,B,A,-,A,A,A,A
S26_5894,,-,B,-,A,A,B,B,B,A,A,B,A,B,A,B,A,A,B,B,A,B,A,B,A,A,A,A,A,A,A,B,B,B,B,A,A,A,A,A,B,A,B,B,A,A,A,A,A,B,B,B,B,B,A,-,B,B,B,B,A,B,-,A,A,A,A,A,A,B,B,A,B,A,B,B,B,B,A,A,-,A,B,A,A,B,B,B,B,A,A,A,A,B,A,A,B,A,B,B,A,B,B,A,B,B,A,B,B,B,A,A,-,B,A,A,B,B,B,A,A,A,B,B,B,B,A,B,B,A,A,B,B,B,B,B,B,B,-,-,B,A,B,-,A,B,A,B,B,-,B,B,B,B,A,A,A,A,B,B,A,A,B,A,B,B,B,B,A,A
S26_17700,,A,B,-,A,A,B,B,B,A,A,B,A,B,A,B,A,A,B,B,A,B,A,B,A,A,A,A,A,A,A,B,B,B,B,A,A,A,A,A,B,A,B,B,A,A,A,A,A,B,B,B,B,B,A,-,B,B,B,B,A,B,-,-,A,A,-,A,A,B,B,A,B,A,B,B,B,B,A,A,-,A,B,A,A,B,B,B,B,A,A,A,A,B,A,A,B,A,B,B,A,B,B,A,B,B,A,B,B,B,A,A,-,B,A,A,B,B,B,A,A,A,B,B,B,B,A,B,B,A,A,B,B,B,B,B,B,B,-,-,B,A,B,-,A,B,A,B,B,-,B,B,B,B,A,A,A,A,B,B,A,A,B,A,B,-,B,B,A,A
S26_20137,,-,B,A,A,A,B,B,B,A,A,B,A,B,A,B,A,A,B,B,A,B,A,-,A,A,A,A,A,A,A,B,B,B,B,A,A,A,A,A,B,A,B,B,A,A,A,A,A,B,B,B,B,B,A,-,B,B,B,B,A,B,-,A,A,A,A,A,A,B,B,A,B,A,-,B,B,B,A,A,-,A,B,A,A,B,B,B,B,A,A,A,A,B,A,A,B,A,B,B,A,B,B,A,B,B,A,B,B,B,A,A,-,B,A,A,B,B,B,A,A,A,B,B,B,B,A,B,B,A,A,B,B,B,B,B,-,B,-,-,B,A,B,-,A,B,A,B,B,-,B,B,B,B,A,A,A,A,B,B,A,A,B,A,B,-,B,B,A,A
S26_60059,,-,B,-,A,A,B,B,B,A,A,B,A,B,A,B,A,A,B,B,A,B,A,B,A,A,A,A,A,A,A,B,B,B,B,A,A,A,A,A,B,A,B,B,A,A,A,A,A,B,B,B,B,B,A,-,B,B,B,B,A,B,-,A,A,A,A,A,A,B,B,A,B,A,B,B,B,B,A,A,-,A,B,A,A,B,B,B,B,A,A,A,A,B,A,A,B,A,B,B,A,B,B,A,B,B,A,B,B,B,A,A,-,B,A,A,B,B,B,A,A,A,B,B,B,B,A,B,B,A,A,B,B,B,B,B,B,B,-,A,B,A,B,-,A,B,A,B,B,-,B,B,B,B,A,A,A,A,B,B,A,A,B,A,B,-,B,B,A,A
S26_77732,,-,B,-,A,A,B,B,B,A,A,B,A,B,A,B,A,A,B,B,A,B,A,-,A,A,A,A,A,A,A,B,B,B,B,A,A,A,A,A,B,A,B,B,A,A,A,A,A,B,B,B,B,B,A,-,B,B,B,B,A,B,-,A,A,A,A,A,A,B,B,A,B,A,-,B,B,B,A,A,-,A,B,A,A,B,B,B,B,A,A,A,A,B,A,A,B,A,B,B,A,B,B,A,B,B,A,B,B,B,A,A,A,B,A,A,B,B,B,A,A,A,B,B,B,B,A,B,B,A,A,B,B,B,B,B,B,B,-,A,B,A,B,-,A,B,A,B,B,-,B,B,B,B,A,A,A,A,B,B,A,A,B,A,B,-,B,B,A,A
S26_85288,,-,B,-,A,A,B,B,B,A,A,B,A,B,A,B,A,A,B,B,A,B,A,B,A,A,A,A,A,A,A,B,B,B,B,A,A,A,A,A,B,A,B,B,A,A,A,A,A,B,B,B,B,B,A,-,B,B,B,B,A,B,-,A,A,A,A,A,A,B,B,A,B,A,B,B,B,B,A,A,-,A,B,A,A,B,B,B,B,A,A,A,A,B,A,A,B,A,B,B,A,B,B,A,B,B,A,B,B,B,A,A,-,B,A,A,B,B,B,A,A,A,B,B,B,B,A,B,B,A,A,B,B,B,B,B,B,B,-,A,B,A,B,-,A,B,A,B,B,-,B,B,B,B,A,A,A,A,B,B,A,A,B,A,B,B,B,B,A,A
S26_117934,,-,B,-,A,A,B,B,B,A,A,B,-,B,A,B,A,A,B,B,A,B,A,-,A,A,A,A,A,A,A,B,B,B,B,A,A,A,A,A,B,A,B,B,A,A,A,A,A,B,B,B,B,B,A,-,-,B,B,B,A,B,-,-,A,A,A,A,A,B,B,A,B,A,-,B,B,B,A,A,-,A,B,A,A,B,B,B,B,A,A,A,A,B,A,A,B,A,B,B,A,B,B,A,B,B,A,B,A,B,A,A,A,B,A,A,B,B,B,A,A,A,B,B,B,B,A,B,B,A,A,B,B,B,B,B,B,B,-,-,B,A,B,-,A,B,A,B,B,-,B,B,B,B,A,A,A,A,B,B,A,A,B,A,B,-,B,B,A,A
S26_119875,,-,B,-,A,-,B,-,B,A,A,B,-,B,A,B,A,A,B,B,A,B,A,-,A,A,A,A,A,A,A,B,B,B,B,A,A,A,-,A,B,A,B,B,A,-,A,A,A,B,B,B,B,B,A,-,B,B,B,B,A,B,-,-,A,A,A,A,A,B,B,A,B,A,-,B,B,B,A,A,-,A,B,A,A,B,B,B,B,A,A,A,A,B,A,A,B,A,B,B,A,B,B,A,B,B,A,B,A,B,A,A,-,B,A,A,B,B,B,A,-,A,B,B,B,B,A,B,B,A,A,B,B,B,B,B,B,B,-,-,B,A,B,-,A,B,A,B,B,-,B,B,B,B,A,A,A,A,B,B,A,A,B,A,B,-,B,B,A,A
S26_122980,,-,B,-,A,A,B,B,B,A,A,B,A,B,A,B,A,A,B,B,A,B,A,B,A,A,A,A,A,A,A,B,B,B,B,A,A,A,A,A,B,A,B,B,A,A,A,A,A,B,B,B,B,B,A,-,B,B,B,B,A,B,-,A,A,A,A,A,A,B,B,A,B,A,B,B,B,B,A,A,-,A,B,A,A,B,B,B,B,A,A,A,A,B,A,A,B,A,B,B,A,B,B,A,B,B,A,B,A,B,A,A,-,B,A,A,B,B,B,A,A,A,B,B,B,B,A,B,B,A,A,B,B,B,B,B,B,B,-,A,B,A,B,-,A,B,A,B,B,-,B,B,B,B,A,A,A,A,B,B,A,A,B,A,B,-,B,B,A,A
S26_150650,,-,B,-,A,A,B,B,B,A,A,B,A,B,A,B,A,A,B,B,A,B,A,B,A,A,A,A,A,A,A,B,B,B,B,A,A,A,A,A,B,A,B,B,A,A,A,B,A,B,B,B,B,B,A,-,B,B,B,B,A,B,-,A,A,A,A,A,A,B,B,A,B,A,B,B,B,B,A,A,A,A,B,A,A,B,B,B,B,A,A,A,A,B,A,A,B,A,B,B,A,B,B,A,B,B,A,B,A,B,A,A,A,B,A,A,B,B,B,A,A,A,B,B,B,B,A,B,B,A,A,B,B,B,B,B,B,B,-,A,B,A,B,-,A,B,A,B,B,-,B,B,B,B,A,A,A,A,B,B,A,A,B,A,B,-,B,B,A,A
S26_151700,,-,B,-,A,-,B,B,B,A,A,B,-,B,A,B,A,A,B,B,A,B,A,-,A,A,A,A,-,A,A,B,B,-,B,A,A,A,A,A,B,A,B,B,A,A,A,B,A,B,B,B,B,B,A,-,B,B,B,B,A,-,-,-,A,A,A,A,A,B,B,A,B,A,-,B,B,B,A,A,-,A,B,A,A,B,B,B,B,A,A,A,A,B,A,A,B,A,B,B,A,B,B,A,B,B,A,B,A,B,A,A,-,B,A,A,B,B,B,A,A,A,B,B,B,B,A,B,B,A,A,B,B,B,B,B,-,B,-,A,B,A,B,-,A,B,A,B,B,-,B,B,B,B,A,A,A,A,B,B,A,A,B,A,B,-,B,B,A,A
S26_163561,,-,B,-,A,A,B,B,B,A,-,B,A,B,A,B,A,A,B,B,A,B,A,-,A,A,A,A,A,A,A,B,B,B,B,A,A,A,A,A,B,A,B,B,A,-,A,B,A,B,B,B,B,B,A,-,B,B,B,B,A,B,-,A,A,A,A,A,A,B,B,A,B,A,B,B,B,B,A,A,-,A,B,A,A,B,B,B,B,A,A,A,A,B,A,A,B,A,B,B,A,B,B,A,B,B,A,B,A,B,A,A,-,B,A,A,B,B,B,A,A,A,B,B,B,B,A,B,B,A,A,B,B,B,B,B,B,B,-,-,B,A,B,-,A,B,A,B,B,-,B,A,B,B,A,A,A,A,B,B,A,A,B,A,B,-,B,B,A,A
S26_207092,,-,B,-,A,A,B,B,B,A,A,B,A,B,A,B,A,A,B,B,A,B,A,B,A,A,A,A,A,A,A,B,B,B,B,A,A,A,A,A,B,A,B,B,A,A,A,B,A,B,B,B,B,B,A,-,B,B,B,B,A,B,-,A,A,A,A,A,A,B,B,A,B,A,B,B,B,B,A,A,-,A,B,A,A,B,B,B,B,A,A,A,A,B,A,A,B,A,B,B,A,B,B,A,B,B,A,B,A,B,A,A,A,B,A,A,B,B,B,A,A,A,B,B,B,B,A,B,B,A,A,B,B,B,B,B,B,B,-,A,B,A,B,-,A,B,A,B,B,-,B,A,B,B,A,A,A,A,B,B,A,A,B,A,B,-,B,B,A,A
S26_210042,,-,B,-,A,-,B,B,B,A,A,B,A,B,A,B,-,A,B,B,A,B,A,-,A,A,A,A,A,A,A,B,B,B,B,A,A,-,A,A,B,A,B,B,A,A,-,B,A,B,B,B,B,B,A,B,B,B,B,B,A,-,-,A,A,A,A,A,A,B,B,A,B,A,B,B,B,B,A,A,-,A,B,A,A,B,B,B,B,A,A,A,A,B,A,A,B,A,B,B,A,B,B,-,B,B,A,B,A,B,A,A,-,B,A,A,-,B,B,A,A,A,-,B,B,B,A,B,B,A,A,B,B,B,B,B,B,B,-,-,B,A,B,-,A,B,A,B,B,-,B,A,B,B,A,A,A,A,-,B,A,A,B,A,B,-,B,B,A,A
S26_259506,,-,B,-,A,-,B,B,B,A,A,B,-,B,A,B,A,A,B,B,A,B,A,-,A,A,A,A,-,A,A,B,B,B,B,A,A,A,A,A,B,A,B,B,A,-,A,B,A,B,B,B,B,B,A,B,B,B,B,B,A,B,B,-,A,A,-,A,A,B,B,A,B,A,-,B,B,B,A,A,-,A,B,A,A,B,B,B,B,A,A,-,A,B,A,A,B,A,B,B,A,B,B,A,B,B,A,B,A,B,A,A,-,B,A,A,B,B,B,A,A,A,B,B,B,B,A,B,B,A,A,B,B,B,B,B,-,B,-,-,B,A,B,-,A,B,A,B,B,-,B,A,B,B,A,A,A,A,B,B,A,A,B,A,B,-,B,B,A,A
S26_283967,,-,B,-,A,A,B,B,B,A,A,B,A,B,A,B,A,A,B,B,A,B,A,B,A,A,A,A,A,A,A,B,B,B,B,A,A,A,A,A,B,A,B,B,A,A,A,B,A,B,B,B,B,B,A,-,B,B,B,B,A,B,-,A,A,A,A,A,A,B,B,A,B,A,B,B,B,B,A,A,-,A,B,A,A,B,B,B,B,A,A,A,A,B,A,A,B,A,B,B,A,B,B,A,B,B,A,B,A,B,A,A,A,B,A,A,B,B,B,A,A,A,B,B,B,B,A,B,B,A,A,B,B,B,B,B,A,B,-,-,B,A,B,-,A,B,A,B,B,-,B,A,B,B,A,A,A,A,B,B,A,A,B,A,B,-,B,B,A,A
S26_309616,,-,B,-,A,A,B,B,B,A,A,B,A,B,A,B,A,A,B,B,A,B,A,B,A,A,A,A,A,A,A,B,B,B,B,A,A,A,A,A,B,A,B,B,A,A,A,B,A,B,B,B,B,B,A,-,B,B,B,B,A,B,A,-,A,A,A,A,A,B,B,A,B,A,B,B,B,B,A,A,-,A,B,A,A,B,B,B,B,A,A,A,A,B,A,A,B,A,B,B,A,B,B,A,B,B,A,B,A,B,A,A,-,B,A,A,B,B,B,A,A,A,B,B,B,B,A,B,B,A,A,B,B,B,B,B,A,B,-,A,B,A,B,-,A,B,A,B,B,A,B,A,B,B,A,A,A,A,B,B,A,A,B,A,B,B,B,B,A,A
S26_312321,,-,B,-,A,A,B,-,B,A,-,B,A,B,A,-,A,A,B,B,A,B,A,B,A,A,A,A,A,A,A,B,B,B,B,A,A,A,A,A,B,A,B,B,A,A,A,B,A,-,B,B,B,B,A,-,B,B,B,B,A,B,A,-,A,A,A,A,A,B,B,A,B,A,-,B,B,B,A,A,-,A,B,A,A,B,B,B,B,A,A,A,A,B,A,A,B,A,B,B,A,B,B,A,B,B,A,B,A,B,A,A,-,B,A,A,B,B,B,A,A,A,B,B,B,-,A,B,B,A,A,B,B,B,B,B,A,B,-,A,B,A,B,-,A,B,A,B,B,-,B,A,B,B,A,A,A,A,-,B,A,A,B,A,B,-,B,B,A,A
S26_313978,,-,B,A,A,A,B,B,B,A,A,B,A,B,A,B,A,A,B,B,A,B,A,-,A,A,A,A,A,A,A,B,B,B,B,A,A,A,A,A,B,A,B,B,A,A,A,B,A,B,B,B,B,B,A,-,B,B,B,B,A,B,A,A,A,A,A,A,A,B,B,A,B,A,B,B,B,B,A,A,-,A,B,A,A,B,B,B,B,A,A,A,A,B,A,A,B,A,B,B,A,B,B,A,B,B,A,B,A,B,A,A,-,B,A,A,B,B,B,A,A,A,B,B,B,B,A,B,B,A,A,B,B,B,B,B,-,B,-,A,B,A,B,-,A,B,A,B,B,-,B,A,B,B,A,A,A,A,B,B,A,A,B,A,B,-,B,B,A,A
S26_328470,,-,B,-,A,A,B,B,B,A,A,B,A,B,A,B,A,A,B,B,A,B,A,B,A,A,A,A,-,A,A,B,B,B,B,A,A,A,A,A,B,A,B,B,A,A,A,B,A,B,B,B,B,B,A,-,B,B,B,B,A,B,A,A,A,A,A,A,A,B,B,A,B,A,-,B,B,B,A,A,-,A,B,A,A,B,B,B,B,A,A,A,A,B,A,A,B,A,B,B,A,B,B,A,B,B,A,B,A,B,A,A,-,B,A,A,B,B,B,A,A,A,B,B,B,B,A,B,B,A,A,B,B,-,B,B,A,B,-,-,B,A,B,-,A,B,A,B,B,-,B,A,B,B,A,A,A,A,B,B,A,A,B,A,B,-,B,B,A,-
S26_428550,,-,B,-,A,A,B,B,B,A,B,B,A,-,A,B,A,A,B,B,A,B,A,-,A,A,-,A,-,A,A,B,B,B,B,A,A,-,-,A,B,A,B,B,A,-,A,A,A,B,B,B,B,B,A,B,B,B,B,B,A,B,A,-,A,A,-,A,A,B,B,A,B,A,-,B,B,B,A,A,B,A,-,A,A,B,B,B,B,A,A,A,A,B,A,A,B,A,B,B,B,B,B,A,B,B,-,B,A,A,B,A,-,A,A,A,B,B,B,A,A,A,A,B,B,B,A,B,B,-,A,B,B,B,B,B,A,B,A,-,B,-,B,-,A,B,A,B,B,-,B,A,-,B,A,A,A,A,-,B,A,A,B,A,B,-,B,B,A,A
S26_463892,,-,B,-,A,A,B,-,B,B,B,B,-,A,A,-,A,A,B,B,A,B,A,-,A,A,A,A,A,A,A,B,B,B,B,A,A,A,A,A,B,A,B,B,A,A,A,-,A,B,B,B,B,B,A,-,B,B,B,B,A,B,A,-,A,A,A,A,A,B,B,A,B,A,-,B,B,B,A,A,-,A,B,A,A,B,B,-,B,A,A,-,A,B,A,A,B,A,B,B,-,B,B,-,B,B,A,B,A,B,B,A,-,A,A,A,B,B,B,A,A,A,A,B,B,B,A,B,B,-,A,B,B,B,-,B,-,B,A,-,B,-,B,-,A,B,A,B,B,-,B,A,A,B,A,A,A,A,A,B,A,-,B,A,B,-,B,B,A,A
S26_478654,,-,B,-,A,-,B,B,B,B,B,B,-,A,A,B,A,A,B,B,A,B,A,-,A,A,A,A,A,A,A,B,B,B,B,A,A,A,A,B,B,A,B,B,A,A,A,-,A,B,B,B,B,B,A,-,B,B,B,B,A,B,A,-,A,A,A,A,A,B,B,A,B,B,A,B,B,B,A,-,B,A,B,A,A,B,B,B,B,A,A,A,A,B,A,A,B,A,B,B,B,B,B,B,B,B,A,B,A,B,B,A,-,A,A,A,B,B,B,A,A,A,A,B,B,B,A,B,B,A,A,B,B,B,-,B,A,B,A,A,B,-,B,-,A,B,A,B,B,-,B,A,A,B,A,A,A,A,A,B,A,A,B,A,B,-,B,B,A,A
S26_479738,,-,B,-,A,A,B,B,B,B,B,B,A,A,A,B,A,A,B,B,A,B,A,-,A,A,A,A,A,A,A,B,B,B,B,A,A,A,A,B,B,A,B,B,A,A,A,-,A,B,B,B,B,B,A,-,B,B,B,B,A,B,A,-,A,A,A,A,A,B,B,A,B,B,-,B,B,B,A,A,-,A,B,A,A,B,B,B,B,A,A,A,A,B,A,A,B,A,B,B,B,B,B,B,B,B,A,B,A,B,B,A,A,A,A,A,B,B,B,A,A,A,A,B,B,B,A,B,B,A,A,B,B,B,B,B,A,B,A,A,B,-,B,-,A,B,A,B,B,-,B,A,A,B,A,A,A,A,A,B,A,A,B,A,B,B,B,B,A,A
S26_545520,,-,B,-,A,A,B,B,B,B,B,B,A,A,A,B,A,A,B,B,A,B,A,B,A,A,A,A,A,A,A,B,B,-,B,A,A,A,-,B,B,A,B,B,A,A,A,A,A,B,B,B,B,B,A,-,B,B,B,A,A,B,A,-,A,A,A,A,A,B,B,A,B,B,-,B,-,B,A,A,-,A,B,A,A,B,B,B,B,A,A,A,B,B,A,A,B,A,B,B,B,B,B,B,B,B,B,B,A,B,B,A,-,A,A,A,B,B,B,A,A,A,A,B,B,B,B,B,B,A,A,B,B,B,-,B,A,B,A,A,B,B,B,-,A,B,A,B,B,-,B,A,A,B,A,A,A,A,A,B,A,A,B,A,B,-,B,B,A,A
S26_550772,,-,B,-,A,A,B,B,B,B,B,B,A,A,A,B,A,A,B,B,A,B,A,-,A,A,A,A,-,A,A,B,B,B,B,A,A,A,A,B,B,A,B,B,A,A,A,A,A,B,B,B,B,B,A,-,B,B,B,A,A,B,A,-,A,A,A,A,A,B,B,A,B,B,-,B,B,B,A,A,-,A,B,A,A,B,B,B,B,A,A,A,B,B,A,A,B,A,B,B,B,B,B,B,B,B,B,B,A,B,B,A,-,A,A,A,B,B,B,A,A,A,A,B,B,B,B,B,B,A,A,B,B,B,B,B,A,B,A,-,B,-,B,-,A,B,A,B,B,-,B,A,A,B,A,A,A,A,-,B,A,A,B,A,B,-,B,B,A,A
S26_571460,,-,B,-,-,A,B,-,-,B,B,B,-,A,A,B,A,A,-,B,A,B,A,-,A,A,A,A,A,A,A,B,B,-,B,A,-,A,-,B,B,A,B,-,A,-,A,A,A,B,B,B,-,B,A,-,B,B,B,A,A,B,A,A,A,A,A,-,A,B,B,A,B,B,-,B,B,B,A,A,-,A,B,A,A,B,B,-,-,A,A,-,B,B,A,A,B,A,B,B,-,B,B,B,-,B,B,B,A,B,B,-,-,A,A,A,B,B,B,A,-,A,A,B,B,-,B,B,B,A,A,B,B,B,B,B,-,B,A,A,B,-,B,-,A,-,A,B,B,-,B,A,-,B,A,A,A,A,-,B,A,A,B,A,B,-,B,B,A,A
S26_579784,,-,B,-,A,-,B,B,B,B,B,B,A,A,A,B,A,A,B,B,A,B,A,A,A,A,A,A,A,A,A,B,B,B,B,A,A,A,A,B,B,A,B,B,A,A,A,A,A,B,B,B,B,B,A,B,B,B,B,A,A,B,A,A,A,A,A,A,A,B,B,A,B,B,-,B,B,B,A,A,B,A,B,A,A,B,B,B,B,A,A,A,B,B,A,A,B,A,B,B,B,B,B,B,B,B,B,B,A,B,B,A,-,A,A,A,B,B,B,A,A,A,A,B,B,B,B,B,B,A,A,B,B,B,B,B,-,B,A,-,B,-,B,-,A,B,A,B,B,-,B,A,A,B,A,A,A,A,A,B,A,A,B,A,B,-,B,B,A,A
S26_584440,,-,B,A,A,A,B,B,B,B,B,B,A,A,A,B,A,A,B,B,A,B,A,A,A,A,A,A,A,A,A,B,B,B,B,A,A,A,A,B,B,A,B,B,A,A,A,A,A,B,B,B,B,B,A,-,B,B,B,A,A,B,A,A,A,A,A,A,A,B,B,A,B,B,A,B,B,B,A,A,B,A,B,A,A,B,B,B,B,A,A,A,B,B,A,A,B,A,B,B,B,B,B,B,B,B,B,B,A,B,B,A,-,A,A,A,B,B,B,A,A,A,A,B,B,B,B,B,B,A,A,B,B,B,-,B,A,B,A,A,B,-,B,-,A,B,A,B,B,-,B,A,A,B,A,A,A,A,A,B,A,A,B,A,B,-,B,B,A,A
S26_587745,,-,B,-,A,A,B,B,B,-,-,B,-,A,A,B,A,A,B,B,A,-,A,-,A,A,A,A,-,A,A,-,B,-,B,A,A,A,A,B,B,A,B,B,A,A,A,A,A,B,B,B,B,B,A,A,B,-,B,A,A,B,A,-,A,A,A,A,A,B,B,A,B,B,-,B,B,B,A,A,-,A,B,A,A,B,B,-,B,A,A,A,B,B,A,A,B,A,B,B,-,B,B,B,B,B,B,B,A,-,B,A,-,A,A,A,B,-,B,A,A,A,A,B,B,B,B,B,B,-,A,B,B,B,-,B,A,B,-,A,B,-,B,-,A,B,A,B,B,-,B,A,-,B,A,A,A,A,-,B,A,A,B,A,B,-,B,-,A,-
S26_589981,,-,B,-,A,A,B,-,B,B,B,B,A,A,A,-,A,A,B,B,A,B,A,-,A,A,A,A,-,A,A,B,B,B,B,A,A,A,A,B,B,A,B,B,A,A,A,A,A,B,B,B,B,B,A,-,B,B,B,A,A,B,A,-,A,A,A,A,A,B,B,A,B,B,-,B,B,B,A,A,-,A,B,A,A,B,B,B,B,A,A,A,B,B,A,A,B,A,B,B,B,B,B,B,B,B,B,B,A,B,B,A,-,A,A,A,B,B,B,A,A,A,A,B,B,B,B,B,B,A,A,B,B,B,B,B,A,B,A,A,B,-,B,-,A,B,A,B,B,-,B,A,A,B,A,A,A,A,A,B,A,A,B,A,B,-,B,B,A,A
S26_624944,,-,B,-,A,A,B,B,B,B,B,B,A,A,A,B,A,A,B,B,A,B,A,-,A,A,A,A,A,A,A,B,B,B,B,A,A,A,A,B,B,A,B,B,A,A,A,A,A,B,B,B,B,B,A,-,B,B,B,A,A,B,A,-,A,A,A,A,A,B,B,A,B,B,A,B,B,B,A,A,B,A,A,A,A,B,B,B,B,A,A,A,B,B,A,A,B,A,B,B,B,B,B,B,B,B,B,B,A,B,B,A,A,A,A,A,B,B,B,A,A,A,A,B,B,B,B,B,B,A,A,B,B,B,-,B,A,B,A,-,B,-,B,-,A,B,A,B,B,-,B,A,A,B,A,A,A,A,A,B,A,A,B,A,B,B,B,B,A,A
S26_628381,,-,B,-,A,A,B,B,B,B,B,B,A,A,A,B,A,A,B,B,A,B,A,-,A,A,A,A,A,A,A,B,B,B,B,A,A,A,A,B,B,A,B,B,A,A,A,A,A,B,B,B,B,B,A,-,B,B,B,A,A,B,A,A,A,A,A,A,A,B,B,A,B,B,A,B,B,B,A,A,-,A,A,A,A,B,B,B,B,A,A,A,B,B,A,A,B,A,B,B,B,B,B,B,B,B,B,B,A,B,B,A,-,A,A,A,B,B,B,A,A,A,A,B,B,B,B,B,B,A,A,B,B,B,-,B,A,B,A,A,B,-,B,-,A,B,A,B,B,-,B,A,A,B,A,A,A,A,A,B,A,A,B,A,B,-,B,B,A,A
S26_680020,,-,B,-,A,A,B,B,B,B,B,B,A,B,A,B,A,A,B,B,A,B,A,-,A,A,A,A,A,A,A,-,-,B,B,A,A,A,A,B,B,A,B,-,A,A,A,A,A,B,B,B,B,A,A,-,B,B,-,A,A,B,A,-,A,A,A,A,A,B,B,A,B,B,-,B,-,B,A,A,-,A,A,B,A,B,B,B,B,A,A,A,B,-,A,A,B,A,B,-,B,B,B,A,B,B,B,B,A,-,-,A,-,A,A,A,-,B,B,A,A,A,A,B,B,B,B,B,-,B,A,B,B,-,-,B,A,B,A,-,B,-,B,-,A,B,A,B,B,-,B,A,A,B,A,A,A,A,A,B,A,A,A,A,B,-,B,B,A,A
S26_810151,,-,A,-,B,A,B,B,B,-,-,B,A,B,A,B,A,A,B,B,A,B,A,-,B,A,A,A,A,A,A,A,B,B,B,A,A,A,A,B,B,A,B,B,A,A,A,A,A,B,B,B,B,A,A,-,B,B,B,A,A,B,A,-,A,A,A,A,A,B,B,A,A,B,-,B,B,B,A,A,-,A,A,B,A,B,B,B,B,A,B,A,B,B,A,A,B,A,B,B,B,B,B,A,B,B,B,B,A,A,B,A,-,A,A,A,B,B,B,A,A,A,A,B,B,B,B,B,B,B,A,B,B,B,-,B,-,B,B,-,B,-,B,-,A,B,A,B,B,-,B,A,A,B,A,A,A,A,A,B,A,A,A,A,B,-,B,B,A,-
S26_891129,,-,A,-,B,A,B,B,B,B,B,B,B,B,A,B,A,A,B,B,A,B,A,-,B,A,A,A,A,A,A,A,B,B,B,A,A,A,A,B,B,A,B,B,A,A,A,A,A,B,B,B,B,A,A,-,B,B,B,A,A,B,A,A,A,A,A,A,A,B,B,B,A,B,-,B,B,B,A,A,-,A,A,B,A,B,B,B,B,A,B,A,B,B,A,A,B,A,B,B,B,B,B,A,B,A,B,B,A,A,B,A,-,A,A,A,B,B,B,A,A,A,A,B,B,B,B,B,B,B,A,B,B,B,B,B,A,B,B,-,B,-,B,-,A,B,A,B,B,-,B,A,A,B,A,A,A,A,A,B,A,A,A,A,B,-,B,B,A,A
S26_900965,,-,A,-,B,A,B,B,B,B,B,B,B,B,A,B,A,A,B,B,A,B,A,-,B,A,A,A,A,A,A,A,B,B,B,A,A,A,A,B,B,A,B,B,A,A,A,A,A,B,B,B,B,A,A,-,B,B,B,A,A,B,A,A,A,A,A,A,A,B,B,B,A,B,-,B,B,B,A,A,-,A,A,B,A,B,B,B,B,A,B,A,B,B,A,A,B,A,B,B,B,B,B,A,B,A,B,B,A,A,B,A,-,A,A,A,B,B,B,A,A,A,A,B,B,B,B,B,B,B,A,B,B,B,-,B,A,B,B,-,B,-,B,-,A,B,A,B,B,-,B,A,A,B,A,A,A,A,A,B,A,A,A,A,B,-,B,B,A,A
S26_949179,,-,A,-,B,A,B,B,B,B,B,B,B,B,A,B,B,A,B,B,A,B,A,-,B,A,A,A,A,A,A,A,B,B,B,A,B,A,A,B,B,A,B,B,A,-,A,A,A,B,B,B,B,A,A,-,B,B,B,A,A,B,A,A,A,A,A,A,A,B,B,B,A,B,-,B,B,B,A,A,-,A,A,B,A,B,B,B,B,A,B,A,B,B,A,A,B,A,B,B,B,B,B,A,B,A,B,B,A,A,B,A,-,A,A,A,B,B,B,A,A,A,A,B,B,B,B,B,A,B,A,B,B,B,-,B,-,B,B,A,B,-,B,B,A,B,A,B,B,-,B,A,A,B,A,A,A,A,A,B,A,A,A,A,B,-,B,B,A,A
S26_954602,,-,A,-,B,A,B,B,B,B,-,B,B,B,A,-,B,A,B,B,A,B,A,-,B,A,A,A,A,A,A,A,-,B,B,A,B,A,-,B,B,A,B,B,A,-,A,A,A,B,B,B,B,A,A,-,B,B,B,A,A,B,A,-,A,A,A,-,A,B,B,B,A,B,-,B,-,B,A,A,B,-,A,B,-,B,B,B,B,A,B,A,-,B,A,A,B,-,B,B,B,B,B,A,B,A,B,B,A,A,B,A,-,A,A,A,B,B,B,A,A,A,A,B,B,B,B,B,-,B,A,B,B,B,-,B,A,B,-,-,B,-,B,-,A,B,A,B,B,-,B,A,A,B,A,A,A,A,A,B,A,A,A,A,B,-,B,B,A,A
S26_955996,,-,A,-,B,A,B,B,B,B,B,B,B,B,A,B,B,A,B,B,A,B,A,A,B,A,A,A,A,A,A,A,B,B,B,A,B,A,A,B,B,A,B,B,A,A,A,A,A,B,B,B,B,A,A,-,B,B,B,A,A,B,A,A,A,A,A,A,A,B,B,B,A,B,-,B,B,B,A,A,B,A,A,B,A,B,B,B,B,A,B,A,B,B,A,A,B,A,B,B,B,B,B,A,B,A,B,B,A,A,B,A,A,A,A,A,B,B,B,A,A,A,A,B,B,B,B,B,A,B,A,B,B,B,B,B,A,B,B,A,B,-,B,-,A,B,A,B,B,-,B,A,A,B,A,A,A,A,A,B,A,A,A,A,B,-,B,B,A,A
S26_979276,,-,A,-,B,A,B,B,B,B,B,B,B,B,A,B,B,A,B,B,A,B,A,-,B,A,A,A,A,A,A,A,B,B,B,A,B,A,A,B,B,A,B,B,A,A,A,A,A,B,B,B,B,A,A,-,B,B,B,A,A,B,A,B,A,A,A,A,A,B,B,B,A,B,A,B,B,B,A,A,-,A,A,B,A,B,B,B,B,A,B,A,B,B,A,A,B,A,B,B,B,B,B,A,B,A,B,B,A,A,B,A,A,A,A,A,B,B,B,A,A,A,A,B,B,B,B,B,A,B,A,B,B,B,B,B,-,B,B,A,B,-,B,-,A,B,A,B,B,-,B,A,A,B,A,A,A,A,A,B,A,A,A,A,B,B,B,B,A,A
S26_992262,,-,A,-,B,A,B,B,B,B,B,B,B,B,A,B,B,A,B,B,A,B,A,A,B,A,A,A,A,A,A,A,B,B,B,A,B,A,A,B,B,A,B,B,A,A,A,A,A,B,B,B,B,A,A,-,B,B,B,A,A,B,A,B,A,A,A,A,A,B,B,B,A,B,A,B,B,B,A,A,B,A,A,B,A,B,B,B,B,A,B,A,B,B,A,A,B,A,B,B,B,B,B,A,B,A,B,B,A,A,B,A,A,A,A,A,B,B,B,A,A,A,A,B,B,B,B,B,A,B,A,B,B,B,-,B,A,B,B,A,B,-,B,-,A,B,A,B,B,-,B,A,A,B,A,A,A,A,A,B,B,A,A,A,B,-,B,B,A,A
S26_1002898,,-,A,-,B,A,B,B,B,B,B,B,B,B,A,B,B,A,B,B,A,B,A,A,B,A,A,A,A,A,A,A,B,B,B,A,B,A,A,B,B,A,B,B,A,A,A,A,A,B,B,B,B,A,A,B,B,B,B,A,A,B,A,B,A,A,A,A,A,B,B,B,A,B,A,B,B,B,A,A,B,A,A,B,A,B,B,B,B,A,B,A,B,B,A,A,B,A,B,B,B,B,B,A,B,A,B,B,A,A,B,A,-,A,A,A,B,B,B,A,A,A,A,B,B,B,B,B,A,B,A,B,B,B,B,B,A,B,B,A,B,-,B,-,A,B,A,B,B,-,B,A,A,B,A,A,A,A,A,B,B,A,A,A,B,-,B,B,A,A
S26_1008703,,B,A,-,B,A,B,B,B,B,B,B,B,B,A,B,B,A,B,B,A,A,A,-,B,A,A,A,A,A,A,A,B,B,B,A,B,A,A,B,B,A,B,B,A,A,A,A,A,B,B,B,B,A,A,B,B,B,B,A,A,B,A,B,A,A,A,A,B,B,B,B,A,B,-,B,B,B,A,A,-,A,A,B,A,B,B,B,B,A,B,A,B,B,A,A,B,A,B,B,B,B,B,A,B,A,B,B,A,A,B,A,-,A,A,A,B,B,B,A,A,A,A,B,B,B,A,B,A,B,A,B,B,B,-,B,A,B,B,-,B,-,B,-,A,B,A,B,B,A,B,A,A,B,A,A,A,A,A,B,B,A,A,A,B,-,B,B,A,A
S26_1014018,,B,A,-,B,A,B,B,B,B,B,B,-,B,A,-,B,A,B,B,A,A,A,-,B,A,A,A,A,A,A,-,B,-,B,A,-,A,A,B,B,A,B,B,A,A,-,A,A,B,B,B,B,A,A,B,B,B,B,A,A,B,A,-,A,A,A,A,B,B,B,B,A,B,-,B,B,B,A,A,-,A,A,B,A,B,-,B,B,A,B,-,B,B,A,A,B,A,B,-,B,B,B,A,B,A,-,B,A,A,B,A,-,A,A,A,B,B,B,A,A,A,A,B,B,B,A,B,A,-,A,B,B,B,-,B,A,B,-,-,B,A,B,-,A,B,A,B,B,-,B,A,A,B,A,A,A,A,A,B,B,A,A,A,B,-,B,B,A,A
S26_1026022,,B,A,-,B,A,B,B,B,B,B,B,-,B,A,-,B,A,B,B,A,A,A,-,B,A,A,A,A,A,A,A,B,B,B,A,B,A,-,B,B,A,B,B,A,-,A,A,A,B,B,B,B,A,A,B,B,B,B,A,A,B,A,B,A,A,A,A,B,B,B,B,A,B,-,B,B,B,A,A,B,A,A,B,A,B,B,B,B,A,B,A,B,B,A,A,B,A,B,B,B,B,B,A,B,A,B,B,A,-,B,A,-,A,A,A,B,B,B,A,A,A,A,B,B,B,A,B,A,-,A,B,B,B,B,B,-,B,B,-,B,-,B,-,A,B,A,B,B,-,B,A,A,B,A,A,A,A,-,B,B,A,A,A,B,-,B,B,A,A
S26_1089155,,-,A,-,B,A,B,B,A,B,B,B,B,B,A,B,B,A,B,B,A,A,A,A,B,A,A,A,A,A,A,A,B,B,B,A,B,A,A,B,B,B,B,B,A,A,A,A,A,B,B,B,B,A,A,B,B,B,B,A,A,B,A,B,A,A,A,A,B,B,B,B,A,B,A,B,B,B,A,A,B,A,A,B,A,B,B,B,B,A,B,A,B,B,A,A,B,A,B,B,B,B,B,A,B,A,B,B,A,A,B,A,-,A,A,A,B,B,B,A,A,A,A,B,B,B,A,B,A,B,A,B,B,B,-,B,A,B,B,B,B,-,B,-,A,B,A,B,B,A,B,A,A,B,B,A,A,A,A,B,B,A,A,A,B,-,B,B,A,A
S26_1090187,,-,A,-,B,A,B,B,A,B,B,B,B,B,A,B,B,A,B,B,A,A,A,-,B,A,A,A,A,A,A,A,B,B,B,A,B,A,A,B,B,B,B,B,A,A,A,A,A,B,B,B,B,A,A,B,B,B,B,A,A,B,A,B,A,A,A,A,B,B,B,B,A,B,-,B,B,B,A,A,B,A,A,B,A,B,B,B,B,A,B,A,B,B,A,A,B,A,B,B,B,B,B,A,B,A,B,B,A,A,B,A,-,A,A,A,B,B,B,A,A,A,A,B,B,B,A,B,A,B,A,B,B,B,-,B,A,B,B,B,B,-,B,-,A,B,A,B,B,-,B,A,A,B,B,A,A,A,A,B,B,A,A,A,B,-,B,B,B,A
S26_1131325,,-,A,-,B,A,B,B,A,B,B,B,B,B,A,-,B,A,B,B,A,A,A,A,B,A,A,A,A,A,A,A,B,B,B,A,B,A,A,B,B,B,B,A,A,A,A,A,A,B,B,B,B,A,A,B,B,B,B,A,A,B,A,B,A,A,A,A,B,B,B,B,A,B,A,B,A,B,A,A,-,A,A,B,A,B,B,A,B,A,B,A,B,B,A,A,B,A,B,B,B,B,B,A,B,A,B,B,A,A,B,A,-,A,A,A,B,B,B,A,A,A,A,B,B,B,A,B,A,B,A,B,B,B,-,B,A,B,B,B,B,-,B,-,A,B,A,B,B,-,B,A,A,B,B,A,A,A,A,B,B,A,A,A,B,-,B,B,B,A
S26_1142956,,-,A,-,-,-,B,B,A,B,B,B,-,B,A,B,B,-,B,B,A,A,A,-,B,A,A,A,A,A,A,A,B,B,B,A,B,A,A,B,B,B,B,A,A,A,A,A,A,B,B,B,B,A,A,B,B,B,B,A,A,B,A,-,A,A,A,A,B,-,B,B,A,B,-,B,A,B,A,A,-,A,A,B,A,B,B,A,B,A,B,-,B,B,A,A,B,A,B,B,B,B,B,A,B,A,B,B,A,A,B,A,-,A,A,A,B,B,B,-,-,A,A,B,B,B,A,B,A,B,A,B,B,B,-,B,-,B,-,-,B,B,B,-,A,B,A,B,B,-,B,A,-,B,B,A,A,A,A,B,B,A,A,A,-,-,B,B,B,A
S26_1160405,,-,A,-,B,-,B,B,A,-,B,B,-,B,A,-,-,A,B,B,A,A,A,-,B,A,A,A,A,A,A,A,-,-,B,A,B,A,A,B,B,B,B,A,A,A,-,A,-,B,B,B,B,A,A,B,B,B,B,A,A,B,A,-,A,A,A,A,B,B,B,B,A,B,-,B,-,B,A,A,-,A,A,B,A,-,B,A,B,A,B,A,B,B,A,A,B,A,B,B,B,B,B,A,B,A,-,B,A,A,B,A,-,A,A,A,B,B,B,A,A,A,A,B,B,B,A,B,A,-,A,B,B,B,-,B,A,-,B,-,-,-,B,-,A,-,A,B,B,-,B,A,-,B,B,A,A,A,A,B,B,A,A,A,B,-,B,B,B,-
S26_1175351,,-,A,-,B,-,B,B,-,-,-,B,B,B,A,B,B,A,B,-,A,A,A,-,B,A,-,-,A,A,A,A,B,B,B,A,B,A,-,B,B,B,B,A,A,-,A,A,A,B,B,B,B,A,A,B,B,B,B,A,A,B,A,-,-,-,A,A,B,B,B,B,-,B,-,B,-,B,A,A,B,A,A,B,A,B,B,A,B,A,B,A,B,B,A,A,B,A,B,B,B,B,B,A,B,A,B,B,A,A,B,-,-,A,A,A,B,B,B,A,-,A,A,B,B,B,A,B,A,B,A,B,B,B,B,B,-,B,B,B,B,-,B,-,A,B,A,B,B,-,B,A,-,B,B,-,A,A,A,B,B,A,A,A,B,-,B,B,B,A
S26_1281667,,-,A,-,B,A,B,B,A,B,B,B,B,B,A,B,B,A,B,A,A,A,A,-,B,A,A,A,A,A,A,A,B,B,B,A,B,A,A,B,B,B,B,A,A,A,A,A,A,B,B,B,B,A,A,B,A,B,B,A,A,B,A,-,A,A,A,A,B,B,B,B,A,B,-,B,A,B,A,A,-,A,A,B,A,B,B,A,B,A,B,A,B,B,A,A,B,B,B,B,B,B,B,A,B,A,B,B,A,B,B,A,A,A,A,A,A,B,B,B,A,A,A,B,B,B,A,B,A,B,A,B,B,B,-,B,A,A,B,B,B,-,B,-,A,B,A,B,B,-,B,A,A,B,B,A,A,A,A,B,B,A,A,-,B,-,B,B,B,A
S26_1282860,,-,A,-,B,-,B,B,A,B,B,B,B,B,A,B,B,A,-,A,A,A,A,-,B,A,A,A,A,A,A,A,B,B,B,A,B,A,-,B,B,B,B,A,A,A,A,A,A,B,B,B,B,A,A,B,A,B,B,A,A,B,A,-,A,A,A,-,B,B,B,B,A,B,-,B,A,B,A,A,-,A,A,B,A,B,B,A,B,A,B,A,B,B,A,A,B,B,B,B,B,B,B,A,B,A,B,B,A,B,B,A,-,A,A,A,A,B,B,B,A,A,A,B,B,B,A,B,A,B,-,B,B,B,-,B,-,A,B,-,B,-,B,-,A,B,A,B,B,-,B,A,-,B,B,A,A,A,A,B,B,A,A,-,B,-,B,B,B,A
S26_1347390,,-,A,A,B,A,B,B,A,B,B,B,B,B,A,B,B,A,B,A,A,A,A,-,B,A,A,A,A,A,A,A,B,B,B,A,B,A,A,B,B,B,B,A,A,A,A,A,A,B,B,B,B,A,A,B,A,B,B,A,A,B,A,B,A,A,A,A,B,B,B,B,A,A,B,B,A,B,A,A,B,A,A,B,A,B,B,A,B,A,B,A,B,B,A,A,B,B,B,B,B,B,B,A,B,A,B,B,A,B,B,A,-,A,A,A,A,B,B,B,A,A,A,B,B,B,A,B,B,B,A,B,B,B,B,A,A,A,B,B,B,-,B,B,A,B,A,B,B,-,B,A,A,B,B,A,A,A,A,B,B,A,A,-,B,-,B,B,B,A
S26_1360224,,B,A,-,B,-,B,B,A,B,B,B,-,B,A,-,B,A,B,A,A,A,A,-,B,A,A,A,-,A,-,A,B,-,B,A,B,A,A,B,B,B,B,A,A,A,A,A,A,B,B,B,B,A,A,B,A,B,B,A,A,B,A,-,A,A,A,B,-,B,B,B,A,A,-,B,A,B,A,A,-,A,A,B,A,B,B,A,B,A,B,A,B,B,A,B,B,B,B,B,B,B,B,A,B,A,B,B,-,B,B,A,-,A,A,A,A,B,B,B,-,B,A,B,B,B,A,B,-,B,A,B,B,B,-,A,-,A,B,B,B,-,B,-,A,B,A,B,B,-,B,A,A,B,B,A,A,A,A,B,B,A,A,-,B,-,B,B,B,A
S26_1426813,,-,A,-,B,A,B,B,A,B,B,B,B,B,A,B,B,A,A,A,A,A,A,A,B,A,A,B,A,A,A,A,B,B,B,A,B,A,A,A,B,B,B,A,A,A,A,A,A,B,B,B,B,A,A,-,A,B,B,A,A,B,A,-,A,A,A,B,B,B,B,B,A,A,B,B,A,B,A,A,B,A,A,B,A,B,A,A,B,A,B,A,B,B,A,B,B,B,B,B,B,B,B,A,B,A,B,B,A,B,B,A,-,A,A,A,A,B,B,B,A,B,A,B,B,B,B,B,A,B,A,-,B,A,A,A,A,A,B,B,B,-,B,-,A,B,A,B,B,-,B,A,A,B,B,A,A,A,A,B,B,A,A,-,B,-,B,B,B,A
S26_1430298,,-,A,-,B,A,B,B,A,B,B,B,-,B,A,-,B,A,A,A,A,A,A,-,B,A,A,B,-,A,A,A,B,B,B,A,B,A,-,A,B,B,B,A,A,A,A,A,A,B,B,B,B,A,A,A,A,B,B,A,A,B,A,-,A,A,A,B,B,B,B,B,A,A,-,B,A,B,A,A,-,A,A,B,-,B,A,A,-,A,B,A,B,B,A,B,B,-,B,B,-,B,B,A,B,A,B,B,A,B,B,A,-,A,A,A,-,B,B,B,A,B,A,B,B,B,B,B,A,B,A,-,B,A,-,A,-,A,B,-,B,-,B,-,A,B,A,B,B,-,B,A,-,B,B,A,A,A,A,B,B,A,A,-,B,-,B,B,B,A
S26_1432873,,-,A,-,B,A,B,B,A,B,B,B,B,B,A,B,B,A,A,A,A,A,A,A,B,A,A,B,A,A,A,A,B,B,B,A,B,A,A,A,B,B,B,A,A,-,A,A,A,B,B,B,B,A,A,-,A,B,B,A,A,B,A,A,A,A,A,B,B,B,B,B,A,A,B,B,A,B,A,A,-,A,A,B,A,B,A,A,B,A,B,A,B,B,A,B,B,B,B,B,B,B,B,A,B,A,B,B,A,B,B,A,-,A,A,A,A,B,B,B,A,B,A,B,B,B,B,B,A,B,A,-,B,A,A,A,A,A,B,B,B,-,B,-,A,B,A,B,B,-,B,A,A,B,B,A,A,A,A,B,B,A,A,-,B,-,B,B,B,A
S26_1439463,,-,A,-,B,A,B,B,A,B,B,B,B,B,A,B,B,A,A,A,A,A,A,-,B,A,A,B,A,A,A,A,B,B,B,A,B,A,A,A,B,B,B,A,A,A,A,A,A,B,B,B,B,A,A,-,A,B,B,A,A,B,A,A,A,A,A,B,B,B,B,B,A,A,-,B,A,B,A,A,B,A,A,B,A,B,A,A,B,A,B,A,B,B,A,B,B,B,B,B,B,B,B,A,B,A,B,B,A,B,B,A,A,A,A,A,A,B,B,B,A,B,A,B,B,B,B,B,A,B,A,-,B,A,A,A,A,A,B,-,B,-,B,-,A,B,A,B,B,-,B,A,A,B,B,A,A,A,A,B,B,A,A,A,B,-,B,B,B,A
S26_1564328,,-,A,-,B,A,B,B,A,B,B,B,B,B,A,-,B,A,A,A,A,A,B,A,B,A,A,-,A,B,A,A,-,-,B,A,B,A,A,A,B,-,B,A,A,B,A,A,A,B,B,-,-,A,A,-,A,B,B,A,A,-,A,-,A,A,A,B,A,B,B,B,A,A,-,B,A,B,A,A,-,A,A,B,A,B,A,A,-,A,B,A,B,B,A,B,B,-,B,B,A,-,B,A,B,A,B,B,A,A,B,A,-,A,A,A,A,B,B,-,A,B,A,B,B,B,A,B,A,-,A,A,B,A,A,A,A,A,B,-,B,A,B,-,A,A,A,B,B,-,B,A,A,B,B,A,A,A,A,B,B,A,A,-,B,-,B,B,B,A
S26_1626798,,B,A,-,B,A,B,B,A,B,B,B,B,B,A,B,A,A,A,A,A,A,B,-,B,A,A,B,A,B,A,A,B,B,B,A,B,A,A,A,B,B,B,A,A,B,-,A,A,B,B,B,B,A,A,-,A,B,B,A,A,B,A,A,A,A,A,B,A,B,B,B,A,A,B,B,A,B,A,A,-,A,A,B,A,B,A,A,B,A,B,A,B,B,A,B,B,B,B,B,A,A,B,A,B,A,A,B,A,A,B,A,-,A,A,A,A,B,B,B,A,B,A,B,B,B,A,B,A,B,A,A,B,A,A,A,A,A,B,B,B,-,B,-,A,A,A,B,B,-,B,A,A,B,B,A,A,A,A,B,B,A,A,B,B,A,B,B,B,A
S26_1628095,,-,A,-,B,A,B,B,A,B,B,B,B,B,A,-,A,A,A,A,A,A,B,-,B,A,A,B,A,B,A,A,B,B,B,A,B,A,A,A,B,B,B,A,A,B,-,A,A,B,B,B,B,A,A,-,A,B,B,A,A,B,A,-,A,A,A,B,A,B,B,B,A,A,-,B,A,B,A,A,-,A,A,B,A,B,A,A,B,A,B,A,B,B,A,B,B,B,B,B,A,A,B,A,B,A,A,B,A,A,B,A,-,A,A,A,A,B,B,B,A,B,A,B,B,B,A,B,A,B,A,A,B,A,-,A,A,A,B,-,B,-,B,-,A,A,A,B,B,-,B,A,A,B,B,A,A,A,A,B,B,A,A,B,B,-,B,B,B,A
S26_1631068,,B,A,A,B,A,B,B,A,B,B,B,B,B,A,B,A,A,A,A,A,A,B,A,B,A,A,B,A,B,A,A,B,B,B,A,B,A,A,A,B,B,B,A,A,B,-,A,A,B,B,B,B,A,A,-,A,B,B,A,A,B,A,A,A,A,A,B,A,B,B,B,A,A,B,B,A,B,A,A,-,A,A,B,A,B,A,A,B,A,B,A,B,B,A,B,B,B,B,B,A,A,B,A,B,A,A,B,A,A,B,A,A,A,A,A,A,B,B,B,A,B,A,B,B,B,A,B,A,B,A,A,B,A,A,A,A,A,B,B,B,-,B,-,A,A,A,B,B,A,B,A,A,B,B,A,A,A,A,B,B,A,A,B,B,-,B,B,B,A
S26_1668693,,-,A,-,B,A,B,B,A,B,B,B,B,A,A,B,A,A,A,-,A,A,B,A,B,A,A,B,-,B,A,-,B,B,B,A,B,A,A,A,B,B,B,A,A,-,-,B,A,B,B,B,B,A,A,-,A,B,B,B,A,B,A,A,A,A,A,B,A,B,B,B,A,A,-,B,A,B,A,A,-,A,A,B,A,B,A,A,B,A,B,A,B,B,A,B,A,B,B,B,A,A,B,A,B,B,A,B,A,A,B,A,-,A,A,A,A,B,B,B,-,B,A,B,B,B,A,B,A,B,A,A,B,A,A,B,-,A,B,-,B,-,B,-,A,A,A,B,B,-,B,A,A,B,B,A,A,A,-,B,B,A,A,B,B,-,B,B,B,A
S26_1678007,,-,A,-,B,-,B,B,A,B,B,B,B,A,A,B,A,A,A,A,A,A,B,-,B,A,A,B,A,B,A,A,B,B,B,A,B,A,A,A,B,B,B,A,A,B,A,B,A,B,B,B,B,A,A,-,A,B,A,B,A,B,A,-,A,A,A,B,A,B,B,B,A,A,B,B,A,B,A,A,-,A,A,B,A,B,A,A,B,A,B,A,B,B,A,B,A,B,B,B,A,A,B,A,B,B,A,B,A,A,B,A,-,A,A,A,A,B,B,B,A,B,A,B,B,B,A,B,A,B,A,A,B,A,A,B,-,A,B,-,B,-,B,-,A,A,A,B,B,-,B,A,A,B,B,A,A,A,A,B,B,A,A,B,B,-,B,B,B,A
S26_1690455,,-,A,-,B,A,B,B,A,B,B,B,B,A,A,B,A,A,A,A,A,A,B,-,B,A,A,B,A,B,A,A,B,B,B,A,B,A,A,A,B,B,B,A,A,B,-,B,A,B,B,B,B,A,A,-,A,B,A,B,A,B,A,A,A,A,A,B,A,B,B,B,A,A,B,B,A,B,A,A,-,A,A,B,A,B,A,A,B,A,B,A,B,B,A,B,A,B,B,B,A,A,B,A,B,B,A,B,A,A,B,A,-,A,A,A,A,B,B,B,A,B,A,B,B,B,A,B,A,B,A,A,B,A,A,B,-,A,B,B,B,-,B,-,A,A,A,B,B,-,B,A,A,B,B,A,A,A,A,B,B,A,A,B,B,-,B,B,B,A
S26_1692191,,-,A,-,B,A,B,B,A,B,-,B,B,A,A,B,A,A,A,A,A,A,B,-,B,A,A,B,A,B,A,A,B,B,B,A,B,A,A,A,B,B,B,A,A,B,A,B,A,B,B,B,B,A,A,-,A,B,A,B,A,B,A,-,A,A,A,B,A,B,B,B,A,A,-,-,A,B,A,A,-,A,A,B,A,B,A,A,B,A,B,A,B,B,A,B,A,B,B,B,A,A,B,A,B,B,A,B,A,A,B,A,-,A,A,A,A,B,B,B,A,B,A,B,B,B,A,B,A,B,A,A,B,A,A,B,A,A,B,-,B,-,B,-,A,A,A,B,B,-,B,A,A,B,B,A,A,A,A,B,B,A,A,B,B,-,B,B,B,-
S26_1693213,,-,A,-,B,A,B,B,A,B,B,B,-,A,A,-,A,A,A,A,A,A,B,-,B,A,A,B,-,B,A,A,B,-,B,A,-,A,-,A,B,B,B,A,A,-,-,B,A,B,B,B,B,A,A,-,A,B,A,B,A,-,A,-,A,A,A,-,A,B,B,B,A,-,-,B,A,B,A,A,-,A,A,B,A,B,A,A,-,A,B,-,-,B,A,B,A,B,B,B,A,-,B,A,B,B,A,B,A,A,B,A,-,A,A,A,A,B,B,B,-,B,A,B,B,B,A,B,A,B,A,-,B,A,A,B,A,A,B,-,B,-,B,-,A,A,A,B,B,-,-,A,-,B,B,A,A,A,A,B,B,A,A,B,B,-,B,-,B,A
S26_1694305,,-,A,-,B,A,B,B,A,B,B,B,B,A,A,B,A,A,A,A,A,A,B,A,B,A,A,B,A,B,A,A,B,B,B,A,B,A,A,A,B,B,B,A,A,B,-,B,A,B,B,B,B,A,A,-,A,B,A,B,A,B,A,A,A,A,A,B,A,B,B,B,A,A,B,B,A,B,A,A,B,A,A,B,A,B,A,A,B,A,B,A,B,B,A,B,A,B,B,B,A,A,B,A,B,B,A,B,A,A,B,A,-,A,A,A,A,B,B,B,A,B,A,B,B,B,A,B,A,B,A,A,B,A,A,B,A,A,B,B,B,-,B,-,A,A,A,B,B,-,B,A,A,B,B,A,A,A,A,B,B,A,A,B,B,A,B,B,B,A
S26_1697084,,-,A,-,B,A,B,-,A,-,-,B,-,A,A,B,A,A,A,A,A,A,-,A,B,A,A,B,A,B,A,A,B,-,B,A,-,A,A,A,B,B,B,A,A,-,A,B,A,B,B,B,-,A,A,A,A,B,A,B,A,B,A,-,A,A,A,B,A,B,B,B,A,A,-,-,A,B,A,A,-,A,A,B,A,B,A,A,B,A,B,A,B,B,A,B,A,-,-,B,A,A,B,A,B,-,A,B,A,A,-,A,-,A,A,A,A,A,B,B,A,B,A,-,B,B,A,B,A,-,A,A,B,A,A,-,A,A,B,-,B,A,B,-,A,A,A,-,-,-,B,A,A,-,B,A,A,A,A,B,B,A,A,B,-,A,B,-,B,A
S26_1700076,,-,A,-,B,A,B,B,A,B,B,B,B,A,A,B,A,A,A,A,A,A,B,-,B,A,A,B,A,B,A,A,B,B,B,A,B,A,A,A,B,B,B,A,A,B,-,B,A,B,B,B,B,A,A,-,A,B,A,B,A,B,A,A,A,A,A,B,A,B,B,B,A,A,-,B,A,B,A,A,-,A,A,B,A,B,A,A,B,A,B,A,B,B,A,B,A,B,B,B,A,A,B,A,B,B,A,B,A,A,B,A,-,A,A,A,A,B,B,B,A,B,A,B,B,B,A,B,A,B,A,A,B,A,A,B,A,A,B,B,B,-,B,-,A,-,A,B,B,-,B,A,A,B,B,A,A,A,A,B,B,A,A,B,B,-,B,B,B,A
S26_1733401,,-,A,-,B,A,B,B,A,B,-,B,B,A,A,B,A,A,A,A,A,A,B,-,B,A,A,B,A,B,A,A,B,B,B,A,B,A,-,A,B,A,B,A,A,-,-,B,A,B,B,B,B,A,A,-,A,B,A,B,A,B,A,-,A,A,A,B,A,B,B,B,A,A,-,B,A,B,A,A,-,A,A,B,A,B,A,A,B,A,B,A,B,B,A,B,A,B,B,B,A,A,B,A,B,B,A,B,A,A,B,A,-,A,A,A,A,B,B,B,A,B,A,B,B,B,A,B,A,B,A,A,B,A,A,-,-,A,B,-,B,-,B,-,A,A,A,B,B,-,B,A,A,B,B,-,A,A,A,B,B,A,A,B,B,-,B,B,B,-
S26_1735894,,-,A,-,B,A,B,B,A,B,B,B,B,A,A,B,A,A,A,A,A,A,B,A,B,A,A,B,A,B,A,A,B,B,B,A,B,A,A,A,B,A,B,A,A,B,-,B,A,B,B,B,B,A,A,-,A,B,A,B,A,B,A,A,A,A,A,B,A,B,B,B,A,A,B,B,A,B,A,A,-,A,A,B,A,B,A,A,B,A,B,A,B,B,A,B,A,B,B,B,A,A,B,A,B,B,A,B,A,A,B,A,-,A,A,A,A,B,B,B,A,B,A,B,B,B,A,B,A,B,A,A,B,A,A,B,A,A,B,B,B,-,B,-,A,A,A,B,B,-,B,A,A,B,B,A,A,A,A,B,B,A,A,B,B,-,B,B,B,A
S26_1746662,,-,A,-,B,A,B,B,A,B,B,B,B,A,A,B,A,A,A,A,A,A,B,-,B,A,A,B,A,B,A,A,B,B,B,A,B,A,A,A,B,B,B,A,A,B,-,B,A,B,B,B,B,A,A,-,A,B,A,B,A,B,A,-,A,A,A,B,A,B,B,B,A,A,B,B,A,B,A,A,B,A,A,B,A,B,A,A,B,A,B,A,B,B,A,B,A,B,B,B,A,A,B,A,B,B,A,B,A,A,B,A,-,A,A,A,A,B,B,B,A,B,A,B,B,B,A,B,A,A,A,A,B,A,A,B,A,A,B,B,B,-,B,-,A,A,A,B,B,-,B,A,A,B,B,A,A,A,A,B,B,A,A,B,B,A,B,B,B,A
S26_1762863,,-,A,-,B,A,B,B,A,B,B,B,B,A,A,B,A,A,A,A,A,A,B,-,B,A,A,B,A,B,A,A,B,B,B,A,B,A,A,A,B,B,B,A,A,B,-,B,A,B,B,B,B,A,A,-,A,B,A,B,A,B,A,A,A,A,A,B,A,B,B,B,A,A,B,B,A,B,A,A,B,A,A,B,A,B,A,A,B,A,B,A,B,B,A,B,A,B,B,B,A,A,B,A,B,B,A,B,A,A,B,A,-,A,A,A,A,B,B,B,A,B,A,B,B,B,A,B,A,A,A,A,B,A,A,B,A,A,B,B,B,-,B,-,A,A,A,B,B,-,B,A,A,B,B,A,A,A,A,B,B,A,A,B,B,-,B,B,B,A
S26_1766266,,-,A,-,B,A,B,B,A,B,B,B,B,A,A,-,A,A,A,A,A,A,B,-,B,A,-,B,-,B,A,-,B,B,B,A,B,A,A,A,B,B,B,A,A,B,A,-,A,B,B,B,B,-,A,-,A,B,A,-,A,B,A,A,A,A,A,B,-,B,B,-,A,A,-,B,A,B,A,A,-,A,A,B,-,B,A,A,B,A,B,A,B,B,A,B,A,B,B,B,-,A,B,A,B,B,A,B,A,A,B,A,-,A,A,A,A,B,B,B,A,B,A,B,B,B,A,B,A,-,A,A,B,A,A,-,-,A,B,B,-,-,B,-,A,A,A,B,B,-,B,A,A,B,B,A,A,A,-,B,B,A,A,B,B,-,B,B,B,-
S26_1769975,,-,A,-,B,A,B,B,A,B,-,B,B,A,A,-,A,A,A,A,A,A,B,-,B,A,A,B,A,B,A,A,B,B,B,A,B,A,A,A,B,B,B,A,A,-,A,B,A,B,B,B,B,A,A,A,A,B,A,B,A,B,A,A,A,A,A,B,A,B,B,B,A,A,-,B,A,B,A,A,-,A,A,B,A,B,A,A,B,A,-,A,B,-,A,B,A,B,B,B,A,A,B,A,B,B,A,B,A,A,B,A,-,A,A,A,A,B,B,B,A,B,A,B,B,B,A,B,A,A,A,A,B,A,A,-,A,A,B,-,B,-,B,-,A,A,A,B,B,-,B,A,A,B,B,A,A,A,A,B,B,A,A,B,B,-,B,B,B,A
S26_1771123,,-,A,-,B,A,B,-,A,B,B,B,B,A,A,B,A,A,A,A,A,A,B,A,B,A,A,B,A,B,A,A,-,B,B,A,B,A,A,A,B,B,B,A,A,B,-,B,A,B,B,B,B,A,A,-,A,B,A,B,A,B,A,A,A,A,A,B,A,B,B,B,A,A,B,B,A,B,A,A,B,A,A,B,A,B,A,A,B,A,B,A,B,B,A,B,A,B,B,B,A,A,B,A,B,B,A,B,A,A,B,A,A,A,A,A,A,B,B,B,A,B,A,B,B,B,A,B,A,A,A,A,B,A,A,B,A,A,B,B,B,-,B,-,A,A,A,B,B,-,B,A,A,B,B,A,A,A,A,B,B,A,A,B,B,-,B,B,B,A
S26_1791270,,-,A,-,B,-,B,B,A,-,-,B,B,A,A,B,A,A,A,A,A,A,B,-,B,A,A,B,-,B,A,A,B,B,B,A,B,-,A,A,B,B,B,-,-,B,-,B,A,B,B,B,B,A,A,-,A,B,A,B,A,B,A,A,-,A,A,B,A,B,-,B,A,A,-,B,A,B,A,A,-,A,A,B,A,B,A,A,-,A,B,A,B,B,A,B,A,B,B,B,A,A,B,A,B,B,-,B,A,A,B,A,-,A,A,A,-,B,B,B,-,B,A,B,B,B,-,B,A,A,A,A,B,A,A,B,-,A,B,-,B,B,B,-,A,-,A,B,B,-,B,A,A,B,B,A,A,A,-,B,B,A,A,B,-,-,B,-,B,A
S26_1797775,,B,A,-,B,A,B,B,A,B,B,B,B,A,A,B,A,A,A,A,A,A,B,A,B,A,A,B,A,B,A,A,B,B,B,A,B,A,A,A,B,B,B,A,A,B,-,B,A,B,B,B,B,A,A,-,A,B,A,B,A,B,A,A,A,A,A,B,A,B,B,B,A,A,B,B,A,B,A,A,-,A,A,B,A,B,A,A,B,A,B,A,B,B,A,B,A,B,B,B,A,A,B,A,B,B,A,B,A,A,B,A,-,A,A,A,A,B,B,B,A,B,A,B,B,B,A,B,A,A,A,A,B,A,A,B,A,A,B,-,B,-,B,-,A,A,A,B,B,-,B,A,A,B,B,A,A,A,A,B,B,A,A,B,B,-,B,B,B,A
S26_1800684,,-,A,-,B,A,B,B,A,B,B,B,B,A,A,B,A,A,A,A,A,A,B,-,B,A,A,B,A,B,A,A,B,B,B,A,B,A,A,A,B,B,B,A,A,B,A,B,A,B,B,B,B,A,A,-,A,B,A,B,A,B,A,-,A,A,A,B,A,B,B,B,A,A,-,B,A,B,A,A,B,A,A,B,A,B,A,A,B,A,B,A,B,B,A,B,A,B,B,B,A,A,B,A,B,B,A,B,A,A,B,A,-,A,A,A,A,B,B,B,A,B,A,B,B,B,A,B,A,A,A,A,B,A,A,B,A,A,B,B,B,-,B,-,A,-,A,B,B,-,B,A,A,B,B,A,A,A,A,B,B,A,A,B,B,-,B,B,B,A
S26_1804538,,-,A,-,B,A,B,B,A,B,B,B,B,A,A,B,A,A,A,A,A,A,B,-,B,A,A,B,A,B,A,A,B,B,B,A,B,A,-,A,B,B,B,A,A,B,-,B,A,B,B,B,B,A,A,-,A,B,A,B,A,B,A,-,A,A,A,B,A,B,B,B,A,A,-,B,A,B,A,A,-,A,A,B,A,B,A,A,B,A,B,A,B,B,A,B,A,B,B,B,A,-,B,A,B,B,A,B,A,A,B,A,-,A,A,A,A,B,B,B,-,B,A,B,B,B,A,B,A,A,A,A,B,A,A,B,A,A,B,-,B,-,B,-,A,A,A,B,B,-,B,A,A,B,B,A,A,A,A,B,B,A,A,B,B,-,B,B,B,A
S26_1806360,,-,A,-,B,A,B,B,A,B,B,B,B,A,A,B,A,A,A,A,A,A,B,-,B,A,A,B,-,B,A,A,B,B,B,A,B,A,A,A,B,B,B,A,A,B,-,B,A,B,B,B,B,A,A,-,A,B,A,B,A,B,A,-,A,A,A,B,A,B,B,B,A,A,-,B,A,B,A,A,-,A,A,B,A,-,A,A,B,A,B,A,B,B,A,B,A,B,B,B,A,A,B,A,B,B,A,B,A,A,B,A,-,A,A,A,A,B,B,B,A,B,A,B,B,B,A,B,A,A,A,A,B,A,A,B,A,A,B,B,B,-,B,-,A,A,A,B,B,-,B,A,A,B,B,A,A,A,-,B,B,A,A,B,B,-,B,B,B,A
S26_1808204,,-,A,-,B,A,B,-,A,B,B,B,-,A,A,-,A,A,A,A,A,A,B,-,B,A,A,B,A,B,A,A,B,-,B,A,B,A,A,A,-,B,B,A,A,B,-,B,A,B,B,B,B,A,A,-,A,B,A,B,A,-,A,A,A,A,A,-,A,B,B,B,A,A,B,B,A,B,A,A,-,A,A,B,A,B,A,A,-,A,B,A,B,B,A,B,A,B,B,B,-,A,B,A,-,B,A,-,A,A,B,A,-,A,A,A,A,B,B,B,A,B,A,B,B,B,A,B,A,A,A,A,B,A,A,B,-,A,-,-,B,A,B,-,A,A,A,B,B,-,B,A,-,B,B,A,A,A,-,B,B,A,A,-,B,-,B,B,B,A
S26_1810323,,-,A,-,B,A,B,-,A,B,B,B,B,A,A,B,A,A,A,A,A,A,B,-,B,A,A,B,A,B,A,A,B,B,B,A,B,A,A,A,B,B,B,A,A,B,-,B,A,B,B,B,-,A,A,-,A,B,A,B,A,B,A,-,A,A,A,B,A,B,B,B,A,A,B,B,A,B,A,A,-,A,A,B,A,B,A,A,B,A,B,A,B,B,A,B,A,B,B,B,A,A,B,A,B,B,A,B,A,A,B,A,A,A,A,A,A,B,B,B,A,B,A,B,B,B,A,B,A,A,A,A,B,A,A,B,-,A,B,-,B,-,B,-,A,A,A,B,B,-,B,A,A,B,B,A,A,A,A,B,B,A,A,B,B,-,B,B,B,A
S26_1812276,,-,A,-,B,A,B,-,A,B,B,B,-,A,A,-,A,A,A,A,A,A,B,A,B,A,A,B,A,B,A,A,-,B,B,A,B,A,A,A,B,B,B,A,A,B,A,B,A,B,B,B,B,A,A,-,A,B,A,B,A,B,A,A,A,A,A,B,A,B,B,B,A,A,-,-,A,B,A,A,-,A,A,B,A,B,A,A,B,A,B,A,B,B,A,B,A,B,B,B,A,A,B,A,B,B,A,B,A,A,B,A,-,A,A,A,A,B,B,B,A,B,A,B,B,B,A,B,A,A,A,A,B,A,A,B,A,A,B,-,B,-,B,-,A,A,A,B,B,-,B,A,A,B,B,A,A,A,A,B,B,A,A,B,B,-,B,B,B,A
S26_1822596,,-,A,-,B,-,B,B,A,B,B,B,B,A,A,-,A,A,A,A,A,-,B,-,B,A,A,B,A,B,A,A,-,B,B,A,B,A,A,A,B,B,B,A,A,-,A,B,A,B,B,B,B,A,A,-,A,B,A,B,A,B,A,-,A,A,A,B,A,B,B,B,A,A,B,-,A,B,A,A,-,A,A,B,A,B,A,A,B,A,B,A,B,B,A,B,A,B,B,B,A,A,B,A,B,B,A,B,A,-,B,A,-,A,A,A,A,B,B,B,A,B,A,B,B,B,A,B,A,A,A,A,B,A,A,B,-,A,B,-,B,B,B,-,A,A,A,B,B,-,B,A,A,B,B,A,A,A,A,B,B,A,A,B,B,-,B,B,B,A
S26_1827044,,-,A,-,B,A,B,B,A,B,B,B,B,A,A,B,A,A,A,A,A,A,B,A,B,A,A,B,A,B,A,A,B,B,B,A,B,A,A,A,B,B,B,A,A,B,-,B,A,B,B,B,B,A,A,-,A,B,A,B,A,B,A,A,A,A,A,B,A,B,B,B,A,A,A,B,A,B,A,A,-,A,A,B,A,B,A,A,B,A,B,A,B,B,A,B,A,B,B,B,A,A,B,A,B,B,A,B,A,A,B,A,-,A,A,A,A,B,B,B,A,B,A,B,B,B,A,B,A,A,A,A,B,A,A,B,A,A,B,-,B,-,B,A,A,A,A,B,B,-,B,A,A,B,B,A,A,A,A,B,B,A,A,B,B,-,B,B,B,A
S26_1831582,,-,A,-,B,A,B,B,A,B,B,B,B,A,A,B,A,A,A,A,A,A,B,-,B,A,A,B,A,B,A,A,B,B,B,A,B,A,A,A,B,B,B,A,A,B,A,B,A,B,B,B,B,A,A,-,A,B,A,B,A,B,A,A,A,A,A,B,A,B,B,B,A,A,-,-,A,B,A,A,-,A,A,B,A,B,A,A,B,A,B,A,B,B,A,B,A,B,B,B,A,A,B,A,B,B,A,B,A,A,B,A,-,A,A,A,A,B,B,B,-,B,A,B,B,B,A,B,A,-,A,A,B,A,A,B,A,A,B,-,B,-,B,-,A,A,A,B,B,-,B,A,A,B,B,A,A,A,A,B,B,A,A,B,B,-,B,B,B,-
S26_1849600,,B,A,-,B,A,B,B,A,B,B,B,B,A,A,B,A,A,A,A,A,A,B,-,B,A,A,B,-,B,A,A,B,B,B,A,B,A,A,-,B,B,B,A,A,B,-,B,-,B,B,B,B,A,A,-,A,B,A,B,A,B,A,-,A,B,A,B,A,B,B,B,A,A,-,B,A,B,A,A,-,-,-,B,A,B,A,A,B,A,B,A,B,B,A,B,A,B,B,B,-,-,B,A,B,B,A,B,A,A,B,A,-,A,A,A,A,B,B,B,-,B,A,B,B,B,A,B,-,-,A,-,B,A,A,B,-,A,B,B,B,B,B,-,A,-,-,B,B,-,B,A,-,B,B,-,-,A,A,B,B,A,A,B,B,-,B,B,B,-
S26_1857222,,B,A,-,B,A,B,B,A,B,B,B,B,A,A,B,A,A,A,A,A,A,B,-,B,A,A,B,A,B,A,A,B,-,B,A,B,A,-,A,B,B,B,A,A,B,-,B,A,B,B,B,B,A,A,-,A,B,A,B,A,B,A,A,A,A,A,B,A,B,B,B,A,A,-,B,A,B,A,A,-,A,A,B,A,B,A,-,B,A,B,A,B,B,A,B,A,B,B,B,A,A,B,A,B,B,A,B,A,A,B,A,-,A,A,A,A,B,B,B,-,B,A,B,B,B,A,B,A,A,A,A,B,A,A,B,A,A,B,B,B,-,B,-,A,A,A,B,B,-,B,A,-,B,B,A,A,A,A,B,B,A,A,B,B,-,B,B,B,A
S26_1902567,,-,A,-,B,A,B,B,A,B,B,B,B,A,A,B,A,A,A,A,A,A,B,-,B,A,A,B,A,B,A,B,B,B,B,A,B,A,A,A,B,B,B,A,A,B,-,B,A,B,B,B,A,A,A,-,A,B,A,B,A,B,A,-,A,A,A,B,A,B,B,B,A,A,B,B,A,B,A,A,-,A,A,B,A,B,A,A,B,A,B,A,B,B,A,B,A,B,B,B,A,A,B,A,B,B,A,B,A,A,B,A,-,A,A,A,A,B,B,B,A,B,A,B,B,B,A,B,A,A,A,A,B,A,A,B,A,A,B,-,B,-,B,-,A,A,A,B,B,-,B,A,A,B,B,A,A,A,A,B,B,A,A,B,B,A,B,B,B,A
S26_1904947,,-,A,-,B,A,B,B,A,B,B,B,B,A,A,B,A,A,A,A,A,A,B,B,B,A,A,B,A,B,A,B,B,B,B,A,B,A,A,A,B,B,B,A,A,B,-,B,A,B,B,B,A,A,A,-,A,B,A,B,A,B,A,A,A,A,A,B,A,B,B,B,A,A,B,B,A,B,A,A,B,A,A,B,A,B,A,A,B,A,B,A,B,B,A,B,A,B,B,B,A,A,B,A,B,B,A,B,A,A,B,A,-,A,A,A,A,B,B,B,A,B,A,B,B,B,A,B,A,A,A,A,B,A,A,B,A,A,B,B,B,-,B,A,A,A,A,B,B,-,B,A,A,B,B,A,A,A,A,B,B,A,A,B,B,A,B,B,B,A
S26_1906738,,-,A,-,B,A,B,B,A,B,B,B,B,A,A,B,A,A,A,A,A,A,B,-,B,A,A,B,A,B,A,B,B,B,B,A,B,A,A,A,B,B,B,A,A,B,-,B,A,B,B,B,A,A,A,-,A,B,A,B,A,B,A,-,A,A,A,B,A,B,B,B,A,A,B,B,A,B,A,A,-,A,A,B,A,B,A,A,B,A,B,A,B,B,A,B,A,B,B,B,A,A,B,A,B,B,A,B,A,A,B,A,-,A,A,A,A,B,B,B,A,B,A,B,B,B,A,B,A,A,A,A,B,A,A,B,A,A,B,-,B,-,B,-,A,-,A,B,B,-,B,A,A,B,B,A,A,A,A,B,B,A,A,B,B,-,B,B,B,A
S26_1917255,,-,A,A,B,A,B,B,A,B,B,B,B,A,A,B,A,A,A,A,A,A,B,-,B,A,A,B,A,B,A,B,B,B,B,A,B,A,A,A,B,B,B,A,A,B,-,B,A,B,B,B,A,A,A,-,A,B,A,B,A,B,A,A,A,A,A,B,A,B,B,B,A,A,B,B,A,B,A,A,B,A,A,B,A,B,A,A,B,A,B,A,B,B,A,B,A,B,B,B,A,A,B,A,B,B,A,B,A,A,B,A,A,A,A,A,A,B,B,B,A,B,A,B,B,B,A,B,A,A,A,A,B,A,A,B,A,A,B,B,B,-,B,-,A,A,A,B,B,A,B,A,A,B,B,A,A,A,A,B,B,A,A,B,B,A,B,B,B,A
S26_1941305,,-,A,-,B,A,B,B,A,B,B,-,-,A,A,B,-,A,A,A,A,A,B,-,B,A,A,B,-,B,A,B,B,B,B,A,B,A,-,-,B,B,B,A,A,-,B,A,A,B,B,B,A,A,A,-,A,B,A,B,A,B,A,-,A,-,-,-,-,B,B,B,A,A,-,B,A,-,A,-,-,A,A,B,A,B,A,A,B,A,B,A,B,B,A,B,A,B,B,B,A,A,B,A,B,B,A,B,A,A,B,A,-,A,A,A,A,B,B,B,A,-,A,B,B,B,A,B,A,-,A,A,B,A,A,-,-,A,B,-,B,B,B,-,A,-,A,B,B,-,B,A,-,B,B,A,A,A,A,B,B,A,A,B,B,-,B,B,B,B
S26_1942860,,-,A,-,B,-,B,B,A,B,B,B,B,A,A,-,A,A,A,A,A,A,B,-,B,A,A,B,A,B,A,B,B,B,B,A,B,A,A,A,B,B,B,A,A,B,A,-,A,B,B,B,A,A,A,A,A,B,A,B,A,B,A,-,A,A,A,B,A,B,B,B,A,A,-,B,A,-,A,A,-,A,A,B,A,B,A,A,B,A,B,A,B,B,A,B,A,B,B,-,-,A,B,A,B,B,A,B,A,A,B,A,A,A,A,A,A,B,B,B,A,B,A,B,B,B,A,B,A,A,A,A,B,A,A,B,-,A,B,-,B,-,B,-,A,-,A,B,B,-,B,A,A,B,B,A,A,A,A,-,B,A,A,-,B,-,B,B,B,B
S26_1943918,,-,A,-,B,A,B,B,A,B,B,B,B,A,A,B,A,A,A,A,A,A,B,B,B,A,A,B,A,B,A,B,B,B,B,A,B,A,A,A,B,B,B,A,A,B,-,-,A,B,B,B,A,A,A,-,A,B,A,B,A,B,A,A,A,A,A,B,A,B,B,B,A,A,-,B,A,B,A,A,B,A,A,B,A,B,A,A,B,A,B,A,B,B,A,B,A,B,B,B,A,A,B,A,B,B,A,B,A,A,B,A,-,A,A,A,A,B,B,B,A,B,A,B,B,B,A,B,A,A,A,A,B,A,A,B,A,A,B,-,B,-,B,-,A,A,A,B,B,-,B,A,A,B,B,A,A,A,A,B,B,A,A,-,B,-,B,B,B,B
S26_1944978,,-,A,-,B,A,B,B,A,B,B,B,B,A,A,B,A,A,A,A,A,A,B,B,B,A,A,B,A,B,A,B,B,B,B,A,B,A,A,A,B,B,B,A,A,B,-,B,A,B,B,B,A,A,A,-,A,B,A,B,A,B,A,-,A,A,A,B,A,B,B,B,A,A,-,B,A,B,A,A,-,A,A,B,A,B,A,A,B,A,B,A,B,B,A,B,A,B,B,B,A,A,B,A,B,B,A,B,A,A,B,A,A,A,A,A,A,B,B,B,A,B,A,B,B,B,A,B,A,A,A,A,B,A,A,B,A,A,B,B,B,-,B,-,A,A,A,B,B,-,B,A,A,B,B,A,A,A,A,B,B,A,A,-,B,A,B,B,B,B
S26_1948826,,-,A,-,B,A,B,B,A,B,B,B,B,A,A,B,A,A,A,A,A,A,B,B,B,A,A,B,A,B,A,B,B,B,B,A,B,A,A,A,B,B,B,A,A,B,-,-,A,B,B,B,A,A,A,-,A,B,A,B,A,B,A,A,A,A,A,B,A,B,B,B,A,A,-,B,A,B,A,A,-,A,A,B,A,B,A,A,B,A,B,A,B,B,A,B,A,B,B,B,A,A,B,A,B,B,A,B,A,A,B,A,A,A,A,A,A,B,B,B,A,B,A,B,B,B,A,B,A,A,A,A,B,A,A,B,A,A,B,B,B,-,B,-,A,A,A,B,B,-,B,A,A,B,B,A,A,A,A,B,B,A,A,-,B,-,B,B,B,B
S26_1954145,,-,A,-,B,A,B,B,A,B,B,B,B,A,A,B,A,A,A,A,A,A,B,B,B,A,A,B,A,B,A,B,B,B,B,A,B,A,A,A,B,B,B,A,A,B,-,-,A,B,B,B,A,A,A,-,A,B,A,B,A,B,A,-,A,A,A,B,A,B,B,B,A,A,-,B,A,B,A,A,B,A,A,B,A,B,A,A,B,A,B,A,B,B,A,B,A,B,B,B,A,A,B,A,B,B,A,B,A,A,B,A,A,A,A,A,A,B,B,B,A,B,A,B,B,B,A,B,A,A,A,A,B,A,A,B,A,A,B,B,B,-,B,-,A,A,A,B,B,-,B,A,A,B,B,A,A,A,A,B,B,A,A,-,B,-,B,B,B,B
S26_1957030,,-,A,-,B,-,B,B,A,B,B,B,-,A,A,B,A,A,A,A,A,A,B,-,B,A,A,B,A,B,A,B,B,B,B,A,B,A,A,A,B,B,B,A,A,B,-,B,A,B,B,B,A,A,A,-,A,B,A,B,A,B,A,A,A,A,A,B,A,B,B,B,A,A,B,B,A,B,A,A,-,A,A,B,-,B,A,A,B,A,B,A,B,B,A,B,A,-,B,B,A,A,B,A,B,B,A,B,A,A,B,A,-,A,A,A,A,B,B,B,-,B,A,B,B,B,A,B,A,A,-,A,B,A,A,B,-,A,B,B,B,-,B,-,A,A,A,B,B,-,B,A,-,B,B,A,A,A,-,B,B,A,-,A,B,-,B,B,B,B
S26_1968214,,-,A,-,B,A,B,B,A,B,B,B,B,A,A,B,A,A,A,A,A,A,B,B,B,A,B,B,A,B,A,B,B,B,B,A,B,A,A,A,B,B,B,A,A,B,-,-,A,B,B,B,A,A,A,A,A,B,A,B,A,B,A,A,A,A,A,B,A,B,B,B,A,A,B,B,A,B,A,A,-,A,A,B,A,B,A,A,B,A,B,A,B,B,A,B,A,B,B,B,A,A,B,A,B,B,A,B,A,A,B,A,-,A,A,A,A,B,B,B,A,B,A,B,B,B,A,B,A,A,A,A,B,A,A,B,A,A,B,B,B,-,B,-,A,A,A,B,B,-,B,A,A,B,B,A,A,A,A,B,B,A,A,A,B,-,B,B,B,B
S26_1970591,,-,A,-,B,A,B,B,A,B,B,B,B,A,A,B,A,A,A,A,A,A,B,-,B,A,B,B,A,B,A,B,B,B,B,A,B,A,A,A,B,B,B,A,A,B,-,-,A,B,B,B,A,A,A,A,A,B,A,B,A,B,A,A,A,A,A,B,A,B,A,B,A,A,B,B,A,B,A,A,B,A,A,B,A,B,A,A,B,A,B,A,B,B,A,B,A,B,A,B,A,A,B,A,B,B,A,B,A,A,B,A,A,A,A,A,A,B,B,B,A,B,A,B,B,B,A,B,A,A,A,A,B,A,A,B,A,A,B,B,B,-,B,-,A,A,B,B,B,-,B,A,A,B,B,A,A,A,A,B,B,A,A,A,B,-,B,B,B,B
S26_1974670,,-,A,-,B,A,B,B,A,B,B,B,B,A,A,B,A,A,A,A,A,A,B,-,B,A,B,B,A,B,A,B,B,-,B,A,B,A,A,A,B,B,B,A,A,B,-,-,A,B,B,B,A,A,A,A,A,B,A,B,A,B,A,A,A,A,A,B,A,B,A,B,A,A,B,B,A,B,A,A,-,A,A,B,A,B,A,A,B,A,B,A,B,B,A,B,A,B,A,B,A,A,B,A,B,B,A,B,A,A,B,A,-,A,A,A,A,B,B,B,A,B,A,B,B,B,A,B,A,A,A,A,B,A,A,B,-,A,B,B,B,-,B,-,A,A,B,B,B,-,B,A,A,B,B,A,A,A,A,B,B,A,A,A,B,-,B,B,B,B
S26_1989442,,-,A,-,B,A,B,B,A,B,B,B,B,A,A,B,A,A,A,A,A,A,B,B,B,A,B,B,A,B,A,B,B,B,B,A,B,A,A,A,B,B,B,A,A,B,-,-,A,B,B,B,A,A,A,A,A,B,A,B,A,B,A,A,A,A,A,B,A,B,A,B,A,A,B,B,A,B,A,A,-,A,A,B,A,B,A,A,B,A,B,A,B,B,A,B,A,B,A,B,A,A,B,A,B,B,A,B,A,A,B,A,-,A,A,A,A,B,B,B,A,B,A,B,B,B,A,B,A,A,A,A,B,A,A,B,A,A,B,B,B,-,B,A,B,A,B,B,B,-,B,A,A,B,B,A,A,A,A,B,B,A,A,A,B,-,B,B,B,B
S26_1996225,,-,A,-,B,A,B,B,A,B,B,B,B,A,A,-,A,A,A,A,A,A,B,-,B,A,B,B,A,B,A,B,B,B,B,A,B,A,A,A,B,B,B,A,A,B,-,-,A,B,B,B,A,A,A,A,A,B,A,B,A,B,A,A,A,A,A,B,A,B,A,B,A,A,B,B,A,B,A,-,-,A,A,B,A,B,A,A,B,A,B,A,B,B,A,B,A,B,A,B,A,A,B,A,B,B,A,B,A,A,B,A,-,A,A,A,A,A,B,B,A,B,A,B,B,B,A,B,A,A,A,A,B,A,A,B,A,A,-,-,B,-,B,-,B,A,B,B,B,-,B,A,A,B,B,A,A,A,A,B,B,A,A,A,B,-,B,B,B,B
S26_2017496,,-,A,-,B,A,B,B,A,B,B,B,B,A,A,B,A,A,A,A,A,A,B,-,B,A,B,B,A,B,A,B,B,B,B,A,B,A,A,A,B,B,B,A,A,B,-,-,A,B,B,B,A,A,A,A,A,B,A,B,A,B,A,A,A,A,A,B,A,A,A,B,A,A,B,B,A,B,A,A,B,A,A,B,A,B,A,A,B,A,B,A,B,B,A,B,A,B,A,B,A,A,B,A,B,B,A,B,A,A,B,A,-,A,A,A,A,A,B,B,A,B,A,B,A,B,A,B,A,A,A,A,B,A,A,B,A,A,B,B,B,-,B,-,B,-,B,B,B,-,B,A,A,B,B,A,A,A,A,B,B,A,A,A,B,A,B,B,B,B
S26_2082585,,-,A,-,B,A,B,B,A,B,B,B,-,A,A,B,A,A,A,A,A,A,B,-,B,B,B,B,-,B,A,B,B,-,B,A,B,A,-,A,B,A,B,A,A,B,-,B,A,B,B,B,A,A,A,A,A,B,A,B,A,B,A,-,A,A,A,B,A,A,B,B,A,A,-,B,A,B,A,A,-,A,A,B,A,B,A,A,B,A,B,-,B,B,A,B,A,B,B,B,A,A,B,A,B,B,A,B,A,A,B,A,A,A,A,A,A,A,B,B,A,B,A,B,A,B,A,B,A,A,A,A,B,A,A,B,A,A,B,-,B,-,B,-,B,A,B,B,B,-,B,B,A,B,B,A,A,A,A,B,A,A,A,A,B,-,B,B,B,B
S26_2107882,,-,A,-,B,-,B,-,A,B,B,B,B,A,A,B,A,A,A,-,A,A,B,-,B,B,B,B,A,B,A,B,B,B,B,A,B,A,A,A,B,A,B,-,-,B,B,B,A,B,B,B,A,A,A,A,A,B,A,B,-,B,A,A,A,A,A,B,A,A,B,B,A,A,-,B,A,B,A,A,B,A,-,B,A,B,-,A,B,A,B,A,B,B,A,B,A,B,B,B,-,A,B,A,B,B,B,B,A,-,B,A,-,A,A,A,A,A,B,B,A,B,A,B,-,B,A,B,A,-,A,A,B,A,A,B,-,A,B,B,B,-,B,-,B,-,B,B,B,-,B,B,-,B,B,A,A,A,A,B,A,A,A,A,B,-,B,B,B,B
S26_2109845,,-,A,-,B,A,B,-,A,B,B,B,B,A,A,B,-,A,A,A,A,A,B,-,B,B,B,B,A,B,A,B,B,B,B,A,B,A,-,A,B,A,B,A,A,B,-,-,A,B,B,B,A,A,A,A,A,B,A,B,A,B,A,-,A,A,A,B,A,A,B,B,A,A,-,B,A,B,A,A,B,A,-,B,A,B,A,A,B,A,B,A,B,-,A,B,A,B,-,B,A,A,B,A,-,B,A,B,A,A,B,A,-,A,A,A,A,A,B,B,A,B,A,B,A,B,A,B,A,A,A,A,B,A,A,B,A,A,B,B,B,-,B,-,B,A,B,B,B,-,B,-,A,B,B,A,-,A,A,B,A,A,A,A,-,-,B,B,B,-
S26_2132158,,-,A,-,B,A,B,-,A,B,B,B,-,A,B,B,A,A,B,A,A,A,B,B,B,B,B,B,A,B,A,B,B,B,B,A,B,A,-,A,B,A,B,A,A,B,A,-,A,B,B,A,A,A,A,A,A,B,A,B,A,B,A,A,A,A,A,B,A,A,B,B,A,A,-,B,A,B,A,A,-,A,A,B,A,B,A,A,B,A,B,A,B,B,A,B,A,B,B,B,A,-,B,A,B,B,A,B,A,A,B,A,-,A,A,A,A,A,B,B,A,B,A,B,A,-,A,B,A,-,A,A,B,A,A,A,A,A,B,-,B,-,B,-,B,A,B,B,B,-,B,-,A,B,B,A,A,A,A,B,A,A,A,A,B,-,B,B,B,B
S26_2144659,,-,A,-,B,A,B,B,A,B,-,B,B,A,B,B,A,A,B,A,A,A,B,-,B,B,B,B,A,B,A,B,B,B,B,A,B,A,A,A,B,A,B,A,A,B,A,-,A,B,B,A,A,A,A,A,A,B,A,B,A,B,A,A,A,A,A,B,A,A,B,B,A,A,-,B,A,B,A,A,-,A,A,B,A,B,A,A,B,A,B,A,B,B,A,B,A,B,B,B,A,A,B,A,B,B,A,B,A,A,B,A,-,A,A,A,A,A,B,B,A,B,A,B,A,B,A,B,A,A,A,A,B,A,A,A,A,A,B,-,B,-,B,-,B,A,B,B,B,-,B,-,A,B,B,A,B,A,A,B,A,A,A,A,B,A,B,B,B,B
S26_2157842,,-,A,A,B,A,B,B,A,B,B,B,B,A,B,B,A,A,B,A,A,A,B,-,B,B,B,B,A,B,A,B,B,B,B,A,B,A,A,A,B,A,B,A,A,B,A,-,A,B,B,A,A,A,A,A,A,B,A,B,A,B,A,-,A,A,A,B,A,A,B,B,A,A,B,B,A,B,A,A,B,A,A,B,A,B,A,A,B,A,B,A,B,B,A,B,-,B,B,B,B,A,B,A,B,B,A,B,A,A,B,A,-,A,A,A,A,A,B,B,A,B,A,B,A,B,A,B,A,A,A,A,B,A,A,A,A,A,B,B,B,-,B,-,B,A,B,B,B,-,B,-,A,B,B,A,B,A,A,B,A,A,A,A,B,-,B,B,B,B
S26_2174748,,-,A,-,B,A,B,B,A,B,B,B,B,A,B,B,A,A,B,A,A,A,B,B,B,B,B,B,A,B,A,B,B,B,B,A,B,A,A,A,B,A,B,A,A,B,A,-,A,B,B,A,A,A,A,A,A,B,A,B,A,B,A,A,A,A,A,B,A,A,B,B,A,A,-,B,A,B,A,A,B,A,A,B,A,B,A,A,B,A,B,A,B,B,A,B,-,B,B,B,B,A,B,A,B,B,A,B,A,A,B,-,-,A,A,A,A,A,B,B,A,B,A,B,A,B,A,B,A,A,A,A,B,A,A,A,A,A,B,B,B,-,B,-,B,A,B,B,B,-,B,-,A,B,B,A,B,A,A,B,A,A,A,A,B,-,B,B,B,B
S26_2190805,,-,A,-,B,A,B,B,A,B,B,B,B,A,B,B,A,A,B,A,A,A,B,-,B,B,B,B,A,B,A,B,B,B,B,A,B,A,A,A,B,A,B,A,A,B,A,-,A,B,B,A,A,A,A,A,A,B,A,B,A,B,A,-,A,A,A,B,A,A,B,B,A,A,-,B,A,B,A,A,-,A,A,B,A,B,A,A,B,A,B,A,B,B,A,B,-,B,B,B,B,A,B,A,B,B,A,B,A,A,B,-,-,A,A,A,A,A,B,B,A,B,A,B,A,B,A,B,A,A,A,A,B,A,A,A,A,A,B,-,B,-,B,-,B,A,B,B,B,-,B,B,A,B,B,A,B,A,A,B,A,A,A,A,B,-,B,B,B,B
S26_2232536,,-,A,-,B,A,B,B,A,B,B,B,B,A,B,B,A,A,B,A,A,A,B,B,B,A,B,B,A,B,A,B,B,B,B,A,B,A,A,A,B,A,B,A,A,B,A,B,A,B,B,A,A,A,A,A,A,B,A,B,A,B,A,A,A,A,A,B,A,A,B,B,A,A,-,B,A,B,A,A,B,A,A,B,A,B,A,A,B,A,B,A,B,B,A,B,-,B,B,B,B,A,B,A,B,B,A,B,A,A,B,-,-,A,A,A,A,A,B,B,A,B,A,B,A,B,A,B,A,A,A,A,B,A,A,A,A,A,B,B,B,A,B,-,B,A,B,A,B,-,B,-,A,B,B,A,B,A,A,B,A,A,A,A,B,-,B,B,B,B
S26_2256942,,-,A,-,B,A,B,B,A,B,B,B,-,A,A,-,A,A,-,A,A,A,B,-,A,A,B,B,A,B,A,A,B,-,B,A,-,A,-,A,B,A,B,A,A,-,A,B,A,B,B,A,A,A,A,A,-,B,A,B,A,B,A,-,A,A,A,-,A,A,B,B,A,A,-,B,A,B,A,A,-,A,A,B,A,B,A,A,B,A,B,A,B,B,A,B,-,B,B,B,B,-,B,A,B,B,A,B,A,-,B,A,-,A,A,A,-,A,B,B,A,B,A,B,B,B,A,B,B,A,A,A,A,A,A,A,A,A,B,-,A,A,B,-,B,A,B,A,B,-,B,-,A,B,B,A,B,A,-,B,A,A,A,A,B,-,B,B,A,B
S26_2282844,,B,A,-,B,A,B,B,A,B,B,B,B,A,A,B,A,A,B,A,A,A,B,-,A,A,B,B,A,B,A,A,B,B,B,A,B,A,A,A,B,A,B,A,A,B,A,A,A,B,B,A,A,A,A,A,A,B,A,B,A,B,A,-,A,A,A,B,A,A,B,B,A,A,-,B,A,B,A,A,B,A,A,B,A,B,A,A,B,A,B,A,A,B,A,B,-,B,B,B,B,A,B,A,B,B,A,B,A,A,B,-,A,A,A,A,A,A,B,B,A,B,A,B,B,B,A,B,B,A,A,A,A,A,A,A,A,A,B,B,A,-,B,-,B,A,B,A,B,-,B,-,A,B,B,A,B,A,A,B,A,A,A,A,B,-,B,B,A,B
S26_2318692,,-,A,-,B,A,B,B,A,B,B,B,B,A,A,-,A,A,B,A,A,A,B,-,A,A,B,B,A,B,A,A,B,B,B,A,B,A,A,A,B,A,B,A,A,B,A,A,A,B,B,A,A,A,A,A,A,B,A,B,A,B,A,B,A,A,A,B,A,A,B,B,A,A,-,B,A,B,A,A,-,B,A,B,A,B,A,A,B,A,B,A,A,B,A,B,A,B,B,B,B,A,B,A,B,B,A,B,A,A,B,A,-,A,A,A,A,A,B,B,-,B,A,B,B,B,A,B,B,A,A,A,A,A,A,A,-,A,B,-,A,-,B,-,B,A,B,A,B,-,B,-,-,B,B,A,B,A,-,B,A,A,A,A,B,-,B,B,A,B
S26_2320949,,-,A,-,B,A,B,B,A,B,B,B,B,A,A,B,A,A,B,A,A,A,B,B,A,A,B,B,A,B,A,A,B,B,B,A,B,A,A,A,B,A,B,A,A,B,A,A,A,B,B,A,A,A,A,A,A,B,A,B,A,B,A,B,A,A,A,B,A,A,B,B,A,A,-,B,A,B,A,A,-,B,A,B,A,B,A,A,B,A,B,A,A,B,A,B,-,B,B,B,B,A,B,A,B,B,A,B,A,A,B,-,-,A,A,A,A,A,B,B,A,B,A,B,B,B,A,B,B,A,A,A,A,A,A,A,A,A,B,-,A,-,B,-,B,-,B,A,B,-,B,B,A,B,B,A,B,A,-,B,A,A,A,A,B,-,B,B,A,B
S26_2353781,,-,A,-,B,-,B,B,A,B,B,B,B,A,A,B,A,A,B,A,A,A,B,B,A,A,B,B,A,B,A,A,B,B,B,A,B,A,A,A,B,A,B,A,A,B,A,A,A,B,B,A,A,A,A,A,A,B,A,B,A,B,A,-,A,A,A,B,A,A,B,B,A,A,-,B,A,B,A,A,-,B,A,B,A,B,A,A,B,A,B,A,A,B,A,B,-,B,B,B,B,A,B,A,B,B,A,B,A,A,B,-,-,A,A,A,-,A,B,B,A,B,A,B,B,B,A,B,B,A,A,A,A,A,A,A,A,A,B,-,A,-,B,-,B,-,B,A,B,-,B,B,A,B,B,A,B,A,A,B,A,A,A,A,B,-,B,B,A,B
S26_2362875,,-,A,-,B,A,B,B,A,B,B,B,B,A,A,B,A,A,B,A,A,A,B,-,A,A,B,B,A,B,A,A,B,B,B,A,B,A,A,A,B,A,B,A,A,B,A,A,A,B,B,A,A,A,A,A,A,B,A,B,A,B,A,-,A,A,A,B,A,A,B,B,A,A,B,B,A,B,A,A,-,B,A,B,A,B,A,A,B,A,B,A,A,B,B,B,A,B,B,B,B,A,B,A,B,B,A,B,A,A,B,-,-,A,A,A,A,A,A,B,A,B,A,B,B,B,A,B,B,A,A,A,A,A,A,A,A,A,B,B,A,-,B,-,B,A,B,A,B,-,B,-,A,B,B,A,B,A,B,B,A,A,A,A,B,-,B,B,A,B
S26_2384196,,-,A,-,B,A,B,B,A,B,B,B,B,A,A,B,A,A,B,A,A,A,B,-,A,A,B,B,A,-,A,A,B,B,B,A,B,A,A,A,B,A,B,A,A,B,A,A,A,B,B,A,A,A,A,A,A,B,A,B,A,B,A,-,A,A,A,B,A,A,B,B,A,A,B,-,A,B,A,A,B,B,A,B,A,B,A,A,B,A,B,A,A,B,A,B,A,B,B,B,B,A,B,A,B,B,A,B,A,A,B,-,-,A,A,A,A,A,A,B,A,B,A,B,B,B,A,B,B,A,A,A,A,A,A,A,A,A,B,-,A,-,B,A,B,A,B,A,B,-,A,-,A,B,B,A,B,A,B,B,A,A,A,A,B,-,B,B,A,B
S26_2392472,,-,A,-,B,A,B,B,A,B,B,B,B,A,A,-,A,A,B,A,A,A,B,-,A,A,B,B,A,-,A,A,B,B,B,A,B,A,-,A,B,A,B,A,A,B,A,A,A,B,B,A,A,A,A,-,A,B,A,B,A,B,A,B,A,A,A,B,A,A,B,B,A,A,B,B,A,B,A,A,-,B,A,B,A,B,A,A,B,A,B,A,A,B,A,B,A,B,B,B,B,A,B,A,B,B,A,B,A,A,B,-,-,A,A,A,A,A,A,B,A,B,A,B,B,B,A,B,B,A,A,A,A,A,A,A,A,A,B,B,A,-,B,-,B,A,B,A,B,-,A,-,A,B,B,A,B,A,B,B,A,A,A,A,B,-,B,B,A,B
S26_2395831,,-,A,-,B,A,B,B,A,B,B,B,B,A,A,B,A,A,B,A,A,A,B,B,A,A,B,B,A,-,A,A,B,B,B,A,B,A,A,A,B,A,B,A,A,B,A,A,A,B,B,A,A,A,A,A,A,B,A,B,A,B,A,-,A,A,A,B,A,A,B,B,A,A,B,B,A,B,A,A,-,B,A,B,A,B,A,A,B,A,B,A,A,B,A,B,A,B,B,B,B,A,B,A,B,B,A,B,A,A,B,-,A,A,A,A,A,A,A,B,A,B,A,B,B,B,A,B,B,A,A,A,A,A,A,A,A,A,B,B,A,-,B,-,B,A,B,A,B,-,A,-,A,B,B,A,B,A,B,B,A,A,A,A,B,A,B,B,A,B
S26_2405079,,-,A,-,B,-,B,B,A,B,-,B,B,A,A,-,A,-,B,A,A,A,B,-,A,A,-,B,A,-,A,A,B,B,B,A,-,A,A,A,B,A,-,-,A,B,A,A,A,B,B,A,-,A,A,A,A,B,-,B,A,B,A,B,A,-,A,B,A,A,B,B,A,A,-,B,A,B,A,A,-,-,A,B,A,B,-,A,B,A,B,A,A,-,A,B,A,B,B,B,B,A,B,A,-,B,A,B,A,A,B,A,-,A,A,A,A,A,A,B,A,B,A,B,B,B,A,B,B,A,A,A,A,A,A,A,-,A,B,-,A,-,B,-,B,A,B,-,B,-,A,-,A,B,B,A,B,A,B,B,A,A,A,A,B,-,B,B,A,-
S26_2455221,,-,A,-,B,A,B,B,A,B,B,B,A,A,A,B,A,A,B,A,A,A,A,B,A,A,B,B,A,-,A,A,B,B,B,A,B,A,A,A,B,A,B,A,A,B,A,A,A,B,B,A,A,A,A,A,A,B,A,B,A,B,A,-,A,A,A,B,A,A,B,B,A,A,B,B,A,B,A,A,-,A,A,B,A,B,A,A,B,A,B,A,A,B,A,B,A,B,B,B,B,A,B,A,B,B,A,B,A,A,A,A,-,A,A,A,A,A,A,B,A,B,A,B,B,B,A,B,B,A,A,A,A,A,A,A,A,A,B,B,A,-,B,-,B,A,B,A,B,-,A,-,A,B,B,A,B,A,B,B,A,A,A,A,B,-,B,B,A,B
S26_2472104,,-,A,-,B,A,B,B,A,B,B,B,A,A,A,B,A,A,B,A,A,A,A,-,A,A,B,B,A,-,A,A,B,B,B,A,B,A,A,A,B,A,B,A,A,B,A,A,A,B,B,A,A,A,A,A,A,B,A,B,A,B,A,B,A,A,A,B,A,A,B,B,A,A,-,B,A,B,A,A,B,A,A,B,A,B,A,A,B,A,B,A,A,B,A,B,A,B,B,B,B,A,B,A,B,B,A,B,A,A,A,A,-,A,A,A,A,A,A,B,A,B,A,B,B,B,A,B,B,A,A,A,A,A,A,A,A,A,B,-,A,-,B,-,B,A,B,A,B,-,A,-,A,B,B,A,B,A,B,B,A,A,A,A,B,-,B,B,A,B
S26_2486900,,-,A,-,B,A,B,B,A,B,B,B,A,A,A,B,A,A,B,A,A,A,A,-,A,A,B,B,A,-,A,A,B,B,A,A,B,A,A,A,B,A,B,A,A,B,A,A,A,B,B,A,A,A,A,A,A,B,A,B,A,B,A,-,A,A,A,B,A,A,B,B,A,A,-,B,A,B,A,A,-,A,A,B,A,B,A,A,B,A,B,A,A,B,A,B,A,B,B,B,B,A,B,A,B,B,A,B,A,A,A,-,A,A,A,A,A,A,A,B,A,B,A,B,B,B,A,B,B,A,A,A,A,A,A,A,A,A,B,-,A,-,B,-,B,A,B,A,B,-,A,-,A,B,B,A,B,A,B,B,A,A,A,A,B,A,B,B,A,B
S26_2488086,,-,A,-,-,A,B,B,A,B,B,B,A,A,A,B,A,A,B,A,A,A,A,B,A,A,B,B,A,-,A,A,B,B,A,A,B,A,-,A,B,A,B,A,A,B,A,A,-,B,B,A,A,A,A,A,A,B,-,B,A,-,A,-,A,-,A,B,A,A,B,B,A,A,-,B,A,B,A,-,-,A,A,B,A,B,-,A,B,A,B,-,A,B,A,B,A,B,B,B,B,A,B,A,B,B,A,B,A,A,-,B,-,A,A,A,-,A,A,B,A,B,A,B,B,B,A,B,B,A,A,A,A,A,-,A,-,A,B,-,A,-,B,-,B,-,B,A,B,-,A,-,A,B,B,A,B,A,B,B,A,A,-,A,B,-,B,B,A,B
S26_2491839,,-,A,-,B,A,B,B,A,B,B,B,A,A,A,-,A,A,B,A,A,A,A,-,A,A,B,B,A,-,A,A,B,-,A,A,B,-,-,A,B,A,B,A,A,-,-,A,A,B,B,A,A,A,A,A,A,B,A,B,A,-,-,-,A,A,A,B,A,A,B,-,A,A,-,B,A,B,A,A,B,A,A,B,A,B,A,A,-,A,B,A,A,-,A,B,A,B,B,B,B,A,B,A,B,B,A,B,A,A,-,-,-,A,A,-,-,A,A,B,A,B,A,B,B,B,A,B,B,A,-,A,A,A,-,-,A,-,-,-,A,-,B,-,B,A,B,A,-,-,A,-,A,B,B,A,B,A,B,B,A,A,A,A,B,-,B,B,A,-
S26_2495413,,-,A,-,B,A,B,B,A,B,B,B,A,A,A,B,A,A,B,A,A,A,A,B,A,A,B,B,A,-,A,A,B,B,A,A,B,A,A,A,B,A,B,A,A,B,A,A,A,B,B,A,A,A,A,A,A,B,A,B,A,B,A,B,A,A,A,B,A,A,B,B,A,A,-,B,A,B,A,A,-,A,A,B,A,B,A,A,B,A,B,A,A,B,A,B,A,B,B,B,B,A,B,A,B,B,A,B,A,A,A,-,A,A,A,A,A,A,A,B,A,B,A,B,B,B,A,B,B,A,A,A,A,A,A,A,A,A,B,B,A,-,B,-,B,A,B,A,B,B,A,-,A,B,B,A,B,A,B,B,A,A,A,A,B,A,B,B,A,B
S26_2636396,,-,A,-,B,A,A,B,A,B,B,B,A,A,B,B,A,A,B,A,A,A,A,-,A,A,B,B,-,B,A,A,B,B,A,A,B,A,A,A,A,A,B,A,A,B,A,A,A,B,B,A,A,A,A,A,A,B,A,B,A,B,A,A,A,B,A,B,A,A,B,B,A,A,B,B,A,B,A,A,B,A,A,B,A,B,A,B,B,A,B,A,A,B,A,B,A,B,B,B,B,A,B,A,B,B,A,B,A,A,A,-,-,-,A,A,A,A,A,B,A,B,A,B,B,B,A,B,B,A,A,A,B,A,A,A,-,A,B,B,A,-,B,B,B,A,B,A,B,-,A,-,A,B,B,A,B,A,-,B,A,A,A,B,B,-,B,B,A,B
S26_2663072,,-,A,-,B,-,A,B,A,B,B,B,-,A,B,B,A,A,B,A,A,A,A,-,A,A,B,B,A,B,A,A,B,B,A,A,B,A,A,A,A,A,B,A,A,B,A,A,A,B,B,A,-,A,A,A,A,B,B,B,A,B,A,A,A,B,A,B,A,A,B,B,A,B,-,B,A,B,A,A,-,A,A,B,A,B,A,B,B,A,B,A,A,B,A,B,A,B,B,B,B,A,B,A,B,B,A,B,A,A,A,-,-,-,A,A,A,A,A,B,A,B,A,B,B,B,A,B,B,A,A,A,B,A,A,A,A,A,B,-,A,-,B,-,B,A,B,A,B,-,B,-,A,B,B,A,B,A,B,B,B,A,A,B,B,-,B,B,A,B
S26_2778935,,-,A,-,B,A,A,B,A,B,B,B,A,A,B,B,A,B,B,A,A,A,A,B,A,A,B,B,A,B,A,A,B,B,A,A,B,A,A,A,A,A,B,A,A,B,B,A,A,B,B,A,A,A,A,A,A,B,B,B,A,A,A,A,A,B,A,B,A,A,B,B,A,B,-,B,A,B,A,A,B,A,A,A,A,A,A,B,A,A,B,A,A,B,A,B,A,B,B,B,B,A,B,A,B,B,A,B,A,A,A,-,-,B,A,A,A,A,A,B,A,B,A,B,B,B,A,B,B,A,A,A,B,A,A,A,A,A,B,B,A,-,B,-,B,A,B,A,A,-,A,-,A,B,B,A,B,A,B,B,B,A,A,-,B,-,B,B,A,B
S26_2854894,,-,A,-,B,A,A,B,A,B,B,B,A,A,B,B,A,A,B,A,A,A,A,B,A,A,B,B,A,B,A,A,B,B,A,A,B,A,A,A,A,A,B,A,A,B,B,A,A,B,B,A,A,A,A,A,A,A,B,B,A,A,A,A,A,B,A,B,A,A,B,B,A,B,-,B,A,B,A,A,-,-,A,A,A,A,A,B,A,A,B,A,A,B,A,B,A,B,B,B,B,A,B,A,B,B,A,B,A,A,A,A,-,B,A,A,A,A,A,B,A,B,A,B,B,B,A,B,B,A,A,B,B,A,A,A,A,A,B,B,A,-,B,-,A,A,B,A,A,-,A,-,A,B,B,A,B,A,B,B,B,A,A,A,B,-,B,A,A,B
S26_2905467,,-,A,-,B,A,A,B,A,-,-,B,A,A,B,B,A,A,B,A,A,A,A,B,A,A,B,B,A,B,A,A,B,B,A,A,-,A,A,A,A,A,B,A,A,B,B,B,A,B,B,A,A,A,A,A,A,A,B,B,A,A,A,-,-,B,-,B,A,A,B,B,A,B,B,B,A,B,A,A,B,-,A,A,A,A,A,B,A,A,B,A,A,B,A,B,A,B,B,B,B,A,B,A,B,B,A,B,A,A,A,-,-,B,A,A,A,A,A,B,A,B,A,B,B,B,A,B,B,A,A,B,B,A,A,A,A,B,B,-,A,-,B,-,A,A,B,A,A,-,A,-,A,B,B,A,B,A,B,B,B,A,A,A,B,-,B,A,A,B
S26_2907970,,-,A,-,B,A,A,B,A,B,B,B,A,A,B,B,A,A,B,A,A,A,A,-,A,A,B,B,A,B,A,A,B,B,A,A,B,A,-,A,A,A,B,A,A,B,B,B,A,B,B,A,A,A,A,A,A,A,B,B,A,A,A,-,A,B,A,B,A,A,B,B,A,B,B,B,A,B,A,A,B,-,A,A,A,A,A,B,A,A,B,A,A,B,A,B,A,B,B,B,B,A,B,A,B,B,A,B,A,A,A,-,-,B,A,A,A,A,A,B,A,B,A,B,B,B,A,B,B,A,A,B,B,A,A,A,-,B,B,B,A,-,B,-,A,A,B,A,A,-,A,B,A,B,B,A,B,A,B,B,B,A,A,A,B,-,B,A,A,B
S26_2947859,,-,A,-,B,A,A,B,A,-,B,-,A,A,B,B,A,A,B,A,A,A,A,B,A,A,B,B,A,B,A,A,B,B,A,A,B,A,A,A,A,A,B,A,A,B,B,B,A,B,B,A,A,A,A,A,A,A,B,B,A,A,A,-,A,B,A,B,A,A,B,B,A,B,-,-,A,B,A,A,-,-,A,A,A,A,A,B,A,A,B,A,A,B,A,B,A,B,B,B,B,A,B,A,B,B,A,B,A,A,A,A,-,B,A,A,A,A,A,B,A,B,A,B,B,B,A,B,B,A,A,B,B,A,A,A,A,B,B,B,A,-,B,-,A,A,B,A,A,-,A,-,A,B,B,A,B,A,B,B,B,A,A,A,B,-,B,A,A,-
S26_2951310,,-,A,-,-,A,A,B,A,-,-,B,-,A,B,B,A,A,B,A,A,A,A,-,A,A,B,B,-,B,A,-,B,-,A,A,B,A,-,-,A,A,B,A,A,-,B,B,A,B,B,A,A,A,A,A,A,A,B,B,A,A,-,-,A,B,A,B,A,A,B,B,A,B,-,B,A,B,A,A,-,A,A,A,A,A,A,B,A,A,B,-,A,B,A,B,A,B,B,B,B,A,B,-,B,B,A,B,A,A,A,A,-,B,A,A,A,A,A,B,A,B,A,B,B,B,A,B,B,-,A,B,B,A,A,A,-,B,B,-,A,-,B,-,A,A,B,A,A,-,A,B,A,B,B,A,B,A,-,B,B,A,A,A,B,-,B,A,A,B
S26_2971769,,-,A,-,B,-,A,B,A,B,B,B,A,A,B,B,A,A,B,A,A,A,A,-,A,A,B,B,-,B,A,A,B,B,A,A,B,A,-,A,A,A,B,A,A,B,B,B,A,B,B,A,A,A,A,A,A,A,B,B,A,A,A,-,A,B,A,B,A,A,B,B,A,B,B,B,A,B,A,A,-,B,A,A,A,A,A,B,-,A,B,A,A,B,A,B,A,B,B,B,B,A,B,A,B,B,A,B,A,A,A,B,-,B,A,A,A,A,A,B,A,B,A,B,B,B,A,B,B,A,A,B,B,A,A,A,-,B,B,-,A,B,B,-,A,A,B,A,A,-,A,-,A,B,B,A,B,A,-,B,B,A,A,A,B,-,B,A,A,B
S26_2973014,,-,A,-,B,A,A,B,A,B,B,B,A,A,B,B,A,A,B,A,A,A,A,-,A,A,B,B,A,B,A,A,B,B,A,A,B,A,-,A,A,A,B,A,A,B,B,B,A,B,B,A,A,A,A,A,A,A,B,B,A,A,A,A,A,B,A,-,A,A,B,B,A,B,-,B,A,B,A,A,B,-,A,A,A,A,A,B,A,A,B,A,A,B,A,B,A,B,B,B,B,A,B,A,B,B,A,B,A,A,A,A,-,B,A,A,A,A,A,B,A,B,A,B,B,B,A,B,B,A,A,B,B,A,A,A,A,B,B,B,A,-,B,-,A,A,B,A,A,-,A,-,A,B,B,A,B,A,-,B,B,A,A,A,B,-,B,A,A,B
S26_2979190,,-,A,A,B,A,A,B,A,B,B,B,A,A,B,B,A,A,B,A,A,A,A,B,A,A,B,B,A,B,A,A,B,B,A,A,B,A,A,A,A,A,B,A,A,B,B,B,A,B,B,A,A,A,A,A,A,A,B,B,A,A,A,A,A,B,A,B,A,A,B,B,A,B,B,B,A,B,A,A,-,-,A,A,A,A,A,B,A,A,B,A,A,B,A,B,A,B,B,B,B,A,B,A,B,B,A,B,A,A,A,-,-,B,A,A,A,A,A,B,A,B,A,B,B,B,A,B,B,A,A,B,B,A,A,A,A,B,B,B,A,-,B,-,A,A,B,A,A,-,A,-,A,B,B,A,B,A,B,B,B,A,A,A,B,-,B,A,A,B
S26_2998914,,B,A,-,B,A,A,B,A,B,B,B,A,A,B,B,A,A,B,A,A,A,A,B,A,A,B,B,A,B,A,A,B,B,A,A,B,A,A,A,A,A,B,A,A,B,B,B,A,B,B,A,A,A,A,A,A,A,B,B,A,A,A,A,A,B,A,B,A,A,B,B,A,B,B,B,A,B,A,A,-,-,A,A,A,A,A,B,A,A,B,A,A,B,A,B,A,B,B,B,B,A,B,A,B,B,A,B,A,A,A,A,A,B,A,A,A,A,A,B,A,B,A,B,B,B,A,B,B,A,A,B,B,A,A,A,A,B,B,B,A,-,B,-,A,-,B,A,A,-,A,B,A,B,B,A,B,A,B,B,B,A,A,A,B,-,B,A,A,B
S26_3000318,,-,A,-,B,A,A,B,A,B,B,B,A,A,B,B,A,A,B,A,A,A,A,-,A,A,B,B,A,B,A,A,B,B,A,A,B,A,A,A,A,A,B,A,A,B,B,B,A,B,B,A,A,A,A,A,A,A,B,B,A,A,A,-,A,B,A,B,A,A,B,B,A,B,B,B,A,B,A,A,-,-,A,A,A,A,A,B,A,A,B,A,A,B,A,B,A,B,B,B,B,A,B,A,B,B,A,B,A,A,A,A,-,B,A,A,A,A,A,B,A,B,A,B,B,B,A,B,B,A,A,B,B,A,A,A,A,B,B,-,A,-,B,-,A,A,B,A,A,-,A,-,A,B,B,A,B,A,B,B,B,A,A,A,B,-,B,A,A,B
S26_3001319,,B,A,-,B,A,A,B,A,B,B,B,A,A,B,B,A,-,B,A,A,-,A,B,A,A,B,B,A,B,A,-,B,B,A,A,B,A,A,A,-,A,B,A,A,B,B,B,A,B,B,A,A,A,A,A,A,A,B,B,A,A,A,-,A,B,A,B,A,A,B,B,A,B,-,B,A,B,A,A,B,B,A,A,A,A,A,B,-,A,B,A,A,B,A,B,A,B,B,B,B,A,B,A,B,B,A,B,A,A,A,-,-,B,A,A,A,A,A,B,-,B,A,B,B,B,A,B,B,A,A,B,B,-,A,-,A,B,B,B,-,B,B,-,A,-,B,A,-,B,-,B,A,B,B,A,B,A,B,B,B,A,A,A,B,-,B,A,A,B
S26_3020318,,-,A,-,B,A,A,B,A,B,B,B,A,A,B,B,A,A,B,A,B,A,A,B,A,A,B,B,A,B,A,A,B,B,A,A,B,A,A,A,A,A,B,A,A,B,B,B,A,B,B,A,A,A,A,A,A,A,B,B,A,A,A,A,A,B,A,B,A,A,B,B,A,B,-,B,A,B,A,A,B,-,A,A,A,A,A,B,A,A,B,B,A,B,A,B,A,B,B,B,B,A,B,A,B,B,A,B,A,A,A,A,-,B,A,A,A,A,A,B,A,B,A,B,B,B,A,B,B,A,A,B,B,A,A,A,A,B,B,B,A,-,B,A,A,A,B,A,A,-,A,-,A,B,B,A,B,A,A,B,B,A,A,A,B,B,B,A,A,B
S26_3030716,,-,A,-,B,A,A,B,A,B,B,B,A,A,B,B,A,A,B,A,B,A,A,-,A,A,B,B,A,B,A,A,B,B,A,A,B,A,A,A,A,A,B,A,A,B,B,B,A,B,B,A,A,A,A,A,A,A,B,B,A,A,A,A,A,B,A,B,A,A,B,B,A,B,-,B,A,B,A,A,-,-,A,A,A,A,A,B,A,A,B,B,A,B,A,B,A,B,B,B,B,A,B,A,B,B,A,B,A,A,A,A,-,B,A,A,A,A,A,B,A,B,A,B,B,B,A,B,B,A,A,B,B,A,A,A,A,B,B,-,A,-,B,-,A,A,B,A,A,-,A,-,A,B,B,A,B,A,A,B,B,A,A,A,B,-,B,A,A,B
S26_3033093,,-,A,-,B,A,A,B,-,B,B,B,-,A,B,B,A,-,B,A,B,A,A,-,A,A,B,B,A,B,A,-,B,-,A,A,-,A,-,-,A,A,B,A,A,-,B,B,A,B,B,A,A,A,A,A,A,A,B,B,A,A,-,-,A,B,A,B,A,A,-,B,-,B,-,B,A,B,A,A,-,A,A,A,A,A,A,B,-,A,B,B,A,B,-,B,A,B,B,B,B,A,B,A,B,B,A,B,A,A,A,A,-,B,A,A,-,A,-,B,A,B,A,B,B,B,A,B,B,-,A,B,B,A,A,-,-,B,B,-,A,-,B,-,A,A,B,A,A,-,A,-,-,B,B,A,B,-,-,B,B,A,A,A,B,-,B,A,A,B
S26_3037702,,-,-,-,B,A,A,B,A,B,B,B,-,A,B,B,A,A,B,-,B,A,A,-,A,A,B,B,-,B,A,A,B,-,A,A,B,A,-,A,A,A,B,A,A,-,B,B,-,B,B,A,A,A,A,A,A,A,B,B,A,A,A,-,A,B,A,B,A,A,B,B,A,B,-,B,A,B,A,A,-,-,A,A,-,A,A,B,-,A,B,B,A,B,A,B,A,B,B,B,B,A,B,A,B,B,-,B,A,A,A,A,-,B,A,A,A,-,A,B,A,B,A,B,B,B,A,B,B,A,-,B,B,-,A,A,-,B,B,-,A,-,B,-,A,A,B,A,A,-,A,-,A,B,B,A,B,A,A,B,B,A,-,A,B,-,B,A,A,-
S26_3057082,,-,A,-,B,-,A,B,A,B,B,B,A,A,B,B,A,A,B,A,B,A,A,-,A,A,B,B,A,B,A,A,B,B,A,A,B,A,A,A,A,A,B,A,A,B,B,B,A,B,B,A,A,A,A,A,A,A,B,B,A,A,A,A,A,B,A,B,A,A,B,B,A,B,-,B,A,B,A,A,-,-,A,A,A,A,A,B,A,A,B,B,A,B,A,B,A,B,B,B,B,A,B,A,B,B,A,B,A,A,A,A,-,B,A,A,A,A,A,B,A,B,A,B,B,B,A,B,B,A,A,B,B,A,A,A,-,B,B,B,A,-,B,-,A,A,B,A,A,-,A,-,A,B,B,A,B,A,A,B,B,A,A,A,B,-,B,A,A,B
S26_3081843,,-,A,-,B,A,A,B,A,B,B,-,-,A,B,B,A,A,B,A,B,A,A,B,A,A,B,B,A,B,A,A,B,B,A,A,B,A,A,A,A,A,B,A,A,B,B,B,A,B,B,A,A,A,A,A,A,A,B,B,A,A,A,A,A,B,A,B,A,A,B,B,A,B,B,B,A,B,A,A,-,-,A,A,A,A,A,B,A,A,B,B,A,B,A,B,A,B,B,B,B,A,B,A,B,B,A,B,A,A,A,-,-,B,A,A,A,A,A,B,A,B,A,B,B,B,A,B,B,A,A,B,B,A,A,A,A,B,B,-,A,-,B,-,A,A,B,A,A,-,A,-,A,B,B,A,B,A,A,B,B,A,A,A,B,-,B,A,A,B
S26_3093238,,-,A,-,B,A,A,B,A,B,B,B,-,A,B,-,A,A,B,A,B,A,A,-,A,A,B,B,A,B,A,A,B,B,A,A,B,A,-,A,A,A,B,A,A,B,B,B,A,B,B,A,A,A,A,A,A,A,B,B,A,-,A,-,A,B,A,B,A,A,B,B,A,B,-,-,A,B,A,A,-,-,A,A,A,A,A,B,A,A,B,-,A,B,A,B,A,B,B,B,-,A,B,A,B,B,A,B,-,A,A,-,-,B,A,A,-,-,A,B,-,B,A,B,-,B,A,B,B,A,A,B,B,A,A,-,-,B,B,-,A,B,B,-,A,-,B,A,A,-,A,-,A,B,B,A,-,A,A,B,B,A,A,A,B,-,B,A,A,B
S26_3117082,,-,A,A,B,-,A,B,A,B,B,B,A,A,B,B,A,A,-,A,B,A,A,B,A,A,B,B,A,B,A,A,B,B,A,A,B,A,A,A,A,A,B,A,A,B,B,B,A,B,B,A,A,A,A,A,A,A,B,B,A,A,A,-,A,B,A,B,A,A,B,B,A,B,-,B,A,B,A,A,-,-,A,A,A,A,A,B,-,A,B,-,A,B,A,B,A,-,B,B,B,A,B,A,B,B,A,B,A,A,A,A,-,B,A,A,A,A,A,B,A,B,A,B,B,B,A,B,B,-,A,B,B,A,A,A,A,B,B,B,A,-,B,-,A,A,B,A,A,-,A,-,A,B,B,A,B,A,-,B,B,A,A,A,B,-,B,A,A,B
S26_3119384,,B,A,-,B,A,A,B,A,B,B,B,A,A,B,B,A,A,B,A,B,A,A,B,A,A,B,B,A,B,A,A,B,B,A,A,B,A,A,A,A,A,B,A,A,B,B,B,A,B,B,A,A,A,A,A,A,A,B,B,A,A,A,A,A,B,A,B,A,A,B,B,A,B,-,B,A,B,A,A,B,-,A,A,A,A,A,B,A,A,B,B,A,B,A,B,A,B,B,B,B,A,B,A,B,B,A,B,A,A,A,-,-,B,A,A,A,A,A,B,A,B,A,B,B,B,A,B,B,A,A,B,B,A,A,A,A,B,B,B,A,-,B,-,A,A,B,A,A,-,A,-,A,B,B,A,B,A,A,B,B,A,A,A,B,-,B,A,A,B
S26_3126664,,-,A,-,B,-,A,B,A,B,B,B,A,A,B,B,A,A,B,A,B,A,A,-,A,A,B,B,-,B,A,A,B,B,A,A,B,A,-,A,A,A,B,A,A,-,B,B,A,B,B,A,A,A,A,A,A,A,B,B,A,A,A,A,A,B,A,B,A,A,B,B,-,B,-,B,A,B,A,A,-,-,A,A,A,A,-,B,A,A,B,B,A,-,A,B,A,-,B,B,B,-,B,A,B,B,A,B,A,-,A,B,-,B,A,A,-,A,A,B,A,B,A,B,B,B,-,B,B,-,A,B,B,A,-,A,-,B,B,-,A,B,B,-,A,A,B,A,A,-,A,-,A,B,B,-,-,A,A,B,B,A,A,A,B,-,B,A,A,B
S26_3138078,,-,A,-,B,A,A,B,A,B,B,B,A,A,B,B,A,A,B,A,B,A,A,B,A,A,B,B,A,B,A,A,B,B,A,A,B,A,A,A,A,A,B,A,A,B,B,B,A,B,B,A,A,A,A,A,A,A,B,B,A,A,A,A,A,B,A,B,A,A,B,B,A,B,-,B,A,B,A,A,B,-,A,A,A,A,A,B,A,A,B,B,A,A,A,B,A,B,B,B,B,A,B,A,B,B,A,B,A,A,A,-,-,B,A,A,A,A,A,B,A,B,A,B,B,B,A,B,B,A,A,B,B,A,A,A,A,B,B,B,A,-,B,-,A,A,B,A,A,-,A,-,A,B,B,A,B,A,A,B,B,A,A,A,B,-,B,A,A,B
S26_3139724,,-,A,-,B,-,A,B,A,B,B,B,A,A,B,B,A,A,B,A,B,A,A,-,A,A,B,B,-,B,A,A,B,B,A,A,B,A,-,A,A,A,B,A,A,-,B,B,A,B,B,A,A,A,-,A,A,A,B,B,A,A,A,-,A,B,A,B,A,A,B,B,A,B,-,B,A,B,A,A,-,-,A,A,A,A,A,B,A,A,B,B,A,A,A,B,A,B,B,B,B,A,B,A,B,B,A,B,A,A,A,A,-,B,A,A,A,A,A,B,A,B,A,B,B,B,A,B,B,A,A,B,B,A,A,A,A,B,B,B,A,B,B,-,A,A,B,A,A,B,A,-,A,B,B,A,B,A,A,B,B,A,A,A,B,-,B,A,A,B
S26_3146705,,-,-,-,B,A,A,B,A,B,B,B,A,A,B,B,A,-,B,-,B,A,A,-,A,A,B,B,A,B,-,A,B,B,A,A,B,A,-,A,A,A,B,A,A,B,B,B,A,B,B,A,A,-,A,A,A,A,B,B,A,A,A,A,A,B,A,B,A,A,-,B,A,B,-,B,A,B,A,A,-,A,A,A,-,A,A,B,A,A,B,B,A,-,A,B,A,B,B,B,-,A,B,-,B,B,A,B,A,A,A,A,-,B,A,-,-,A,A,B,A,B,A,B,B,B,-,B,B,A,A,B,B,-,A,A,-,B,B,-,A,B,B,-,A,A,B,A,A,-,A,-,A,B,-,-,B,A,-,B,B,A,A,A,B,-,B,A,A,B
S26_3148924,,-,A,-,B,A,A,B,A,B,B,B,A,A,B,B,A,A,B,A,B,A,A,-,A,A,B,B,A,B,A,A,B,B,A,A,B,A,A,A,-,A,B,A,A,-,B,B,A,B,-,A,A,A,A,A,A,A,B,B,A,A,A,-,A,B,A,B,A,A,B,B,A,B,-,B,A,B,A,A,-,B,-,A,A,A,A,B,A,A,B,B,A,A,A,B,A,B,B,B,B,A,B,A,B,B,A,B,A,A,A,A,-,B,A,A,A,A,A,B,A,B,A,B,B,B,A,B,B,-,A,B,B,A,A,A,-,B,B,-,A,B,B,-,A,A,B,A,A,-,A,-,A,B,B,A,B,A,A,B,B,A,A,A,B,-,B,A,A,B
S26_3192451,,-,A,-,B,A,A,B,A,B,B,B,A,A,B,B,A,A,B,A,B,A,A,-,A,A,B,B,A,B,A,A,B,B,A,A,B,A,A,A,A,A,B,A,A,B,B,B,A,B,B,A,A,A,A,A,A,A,B,B,A,A,A,A,A,B,A,B,A,A,B,B,A,B,B,B,A,B,A,A,B,-,A,A,A,A,A,B,A,A,B,B,A,A,A,B,A,B,B,B,B,A,B,A,B,B,A,B,A,A,A,-,A,B,A,A,A,A,A,B,A,B,A,B,B,B,A,B,B,A,A,B,B,A,A,A,A,B,B,B,A,-,B,-,A,A,B,A,A,-,A,-,A,B,B,A,B,A,A,B,B,A,A,A,B,-,B,A,A,B
S26_3206411,,-,A,-,B,-,A,B,A,B,B,B,A,A,B,B,A,A,B,A,B,A,A,B,-,A,B,B,A,B,A,A,B,B,A,A,B,A,-,A,A,A,B,-,A,-,B,B,A,B,B,A,A,A,A,A,A,-,B,B,A,-,A,-,A,B,A,B,A,A,B,B,A,B,-,B,A,B,A,-,-,B,A,A,A,-,A,B,A,A,B,B,A,A,A,B,A,B,B,B,B,A,B,A,B,B,A,B,-,A,A,-,-,B,A,A,-,A,A,B,-,B,-,B,B,B,A,B,B,-,-,B,B,A,A,A,-,B,B,-,A,-,B,-,A,-,B,A,A,-,A,B,-,B,B,A,B,A,-,B,B,A,A,-,B,-,B,-,A,B
S26_3289792,,-,A,-,B,A,A,B,A,B,-,B,A,A,B,B,A,A,B,A,B,A,A,-,A,A,B,B,A,B,A,A,B,B,A,A,B,A,A,A,A,A,B,A,A,B,B,B,A,B,B,A,A,A,A,A,A,A,B,B,A,A,A,A,A,B,A,B,A,A,B,B,A,B,-,B,A,B,A,A,-,-,A,A,A,A,A,B,A,A,B,B,A,A,A,B,A,B,B,B,B,A,B,A,B,B,A,B,A,A,A,-,-,B,A,A,A,A,A,B,-,A,A,B,B,B,A,B,B,A,A,B,B,A,A,A,A,B,B,-,A,-,B,-,A,-,B,A,A,-,A,-,A,B,B,A,B,A,A,B,B,A,A,A,B,-,B,A,A,B
S26_3329208,,-,A,-,B,B,A,A,B,B,B,B,A,A,B,B,A,A,B,A,B,A,A,B,A,A,B,B,A,B,A,A,B,B,A,A,B,A,-,A,A,A,A,A,A,B,B,B,A,B,B,A,A,A,A,A,A,A,B,B,A,A,A,A,A,B,A,B,A,B,B,B,A,B,B,B,A,B,A,A,B,-,A,A,A,A,A,A,A,A,B,B,A,A,A,B,A,B,B,B,B,A,B,A,B,B,A,B,A,A,A,-,-,B,A,A,A,A,A,B,A,A,A,B,B,B,A,A,B,A,A,B,B,A,B,A,A,B,B,B,A,-,B,-,A,A,B,A,A,-,A,B,A,B,B,A,B,A,A,B,B,A,A,A,B,-,B,A,A,B
S26_3350014,,-,A,-,B,B,A,A,B,B,B,B,A,A,B,B,A,A,B,A,B,A,A,B,A,A,B,B,A,B,A,A,B,B,A,A,B,A,A,A,A,A,A,A,A,B,B,B,A,B,B,A,A,A,A,A,A,A,B,B,A,A,A,A,A,B,A,B,A,B,B,B,A,B,B,B,A,B,A,A,-,-,A,A,A,A,A,A,A,A,B,B,A,A,A,B,A,B,B,B,B,A,B,A,B,B,A,B,A,A,A,-,-,B,A,A,A,A,A,B,A,A,A,B,B,B,A,A,B,A,A,B,B,A,B,A,A,B,B,-,A,-,B,-,A,A,B,A,A,-,A,A,A,B,B,A,B,A,A,B,B,A,A,A,B,-,B,A,A,B
S26_3353679,,-,A,-,B,-,A,A,B,B,B,B,A,A,B,-,A,A,B,A,B,A,A,-,A,A,B,B,A,B,A,A,B,B,A,A,B,A,A,A,A,A,A,A,A,-,B,B,A,B,B,A,A,A,A,A,A,A,B,B,A,A,A,-,A,B,A,B,A,B,B,B,A,B,-,B,A,B,A,A,-,A,A,A,A,A,A,A,A,A,B,B,A,A,A,B,A,-,B,B,-,A,B,A,B,B,A,B,A,A,A,A,-,B,A,A,A,A,A,B,-,A,A,B,B,B,A,A,B,A,A,B,B,A,-,A,A,B,-,-,A,-,B,-,A,A,B,A,A,-,A,A,A,B,B,A,B,A,A,B,B,A,A,A,B,-,B,A,A,B
S26_3371370,,-,A,-,B,B,A,A,B,B,B,B,-,A,B,B,-,A,B,A,B,-,A,-,A,A,B,B,-,B,A,A,B,B,A,A,B,A,-,A,A,A,A,-,A,B,B,B,A,B,B,A,-,A,A,A,A,A,B,B,A,A,A,-,A,B,A,B,A,B,B,B,A,B,-,B,A,B,A,A,B,-,A,A,A,A,A,A,A,A,B,B,A,A,A,B,A,B,B,B,B,A,B,A,B,B,-,B,-,A,A,-,-,B,A,A,A,A,A,B,A,A,A,B,B,B,A,A,B,A,A,B,B,A,B,-,-,B,B,-,A,B,B,-,A,A,B,A,A,-,A,A,-,B,B,A,B,A,A,B,B,A,-,A,B,-,B,A,A,B
S26_3373879,,-,A,-,B,B,A,A,B,B,B,B,-,A,B,-,A,A,B,A,B,A,A,-,A,A,B,-,A,B,A,A,B,-,A,A,B,A,A,A,A,A,A,A,A,B,B,B,A,B,B,A,A,A,A,A,A,A,B,B,A,A,A,A,A,B,A,B,A,B,B,B,A,B,-,B,A,B,A,A,-,-,A,A,A,A,A,A,A,A,B,B,A,A,A,B,A,B,B,B,B,A,B,A,B,B,A,B,A,A,A,A,-,B,A,-,A,A,A,B,A,A,A,B,B,B,A,A,B,A,A,B,B,A,B,A,-,B,B,-,A,-,B,-,A,A,B,A,A,-,A,A,A,B,B,A,B,A,A,B,B,A,A,A,B,-,B,A,A,B
S26_3417016,,-,A,-,B,B,A,A,B,B,B,B,A,A,B,B,A,A,B,A,B,A,A,B,A,A,B,B,A,B,A,A,B,B,A,A,B,A,A,A,A,A,A,A,A,B,B,B,A,B,B,A,B,A,A,A,A,A,B,B,A,A,A,A,A,B,A,B,A,B,B,B,A,B,-,B,A,B,A,A,-,A,A,A,B,A,A,-,A,A,B,B,A,A,A,B,A,B,B,B,B,B,B,A,B,B,A,B,A,A,A,-,-,B,A,A,A,A,A,B,A,A,A,B,B,B,A,A,B,A,A,B,B,A,B,A,A,B,B,-,A,-,B,-,A,A,B,A,A,-,A,A,A,B,B,A,B,A,A,B,B,A,A,A,B,-,B,A,A,B
S26_3421190,,-,A,-,B,B,A,A,B,B,B,B,A,A,B,-,A,-,B,A,-,A,A,-,A,A,B,B,-,-,A,A,B,B,A,A,B,A,A,A,A,A,A,A,A,B,-,B,A,B,B,A,-,A,A,A,A,A,B,B,A,A,A,A,A,B,A,B,A,B,B,B,A,B,-,B,A,B,A,A,-,-,A,A,B,A,A,A,A,A,-,-,A,A,A,-,A,B,-,-,B,B,B,A,B,B,A,B,A,-,A,-,-,-,A,A,A,A,A,B,A,A,A,B,-,B,A,A,B,A,A,B,B,A,B,A,-,A,B,-,A,B,-,-,A,A,-,A,A,-,A,A,A,B,B,A,-,A,A,-,B,A,A,A,-,-,-,A,A,B
S26_3432272,,-,A,-,B,B,A,A,B,B,B,B,A,A,B,B,A,B,B,A,B,A,A,B,A,A,B,B,A,B,A,A,B,B,A,A,B,A,A,A,A,A,A,A,A,B,B,B,A,B,B,A,B,A,A,A,A,A,B,B,A,A,A,-,A,B,A,B,A,B,B,B,A,B,B,B,A,B,A,A,-,-,A,A,B,A,A,A,A,A,B,B,A,A,A,B,A,B,B,B,B,B,B,A,B,B,A,B,A,A,A,-,-,B,A,A,A,A,A,B,-,A,A,B,B,B,A,A,B,A,A,B,B,A,B,A,-,A,B,B,A,-,B,-,A,A,B,A,A,-,A,A,A,B,B,A,B,A,A,B,B,A,A,A,B,-,B,A,A,B
S26_3456911,,-,A,-,B,B,A,A,B,B,B,B,A,A,B,B,A,B,B,A,B,A,A,B,A,A,B,B,A,B,A,A,B,B,A,A,B,A,A,A,A,A,A,A,A,B,B,B,A,B,B,A,B,B,A,A,A,A,B,B,A,-,A,A,A,B,A,B,A,B,B,B,A,B,B,B,A,B,A,A,B,-,A,A,B,A,A,A,A,A,B,B,B,A,A,B,A,-,B,B,B,B,B,A,B,B,A,B,A,A,A,-,-,B,A,A,A,A,A,B,-,A,A,B,B,B,A,A,B,A,A,B,B,A,B,A,A,A,B,B,A,B,B,-,A,A,B,A,A,-,A,A,A,B,B,A,B,A,A,B,B,A,A,A,B,-,B,A,A,B
S26_3461922,,-,A,-,B,B,A,A,B,B,B,B,A,A,B,B,A,B,B,A,B,A,A,-,A,A,B,B,A,B,A,A,B,B,A,A,B,A,A,A,A,A,A,A,A,B,B,B,A,B,B,A,B,B,A,A,A,A,B,B,A,A,A,A,A,B,A,B,A,B,B,B,A,B,B,B,A,B,A,A,B,-,A,A,B,A,A,A,A,A,B,B,-,A,A,B,A,B,B,B,B,B,B,A,B,B,A,B,A,A,A,-,-,B,A,A,A,A,A,B,A,A,A,B,B,B,A,A,B,A,A,B,B,A,B,A,A,A,B,B,A,-,B,-,A,A,B,A,A,-,A,A,A,B,B,A,B,A,A,B,B,A,A,A,B,-,B,A,A,B
S26_3463424,,-,A,-,B,B,A,A,B,B,B,B,A,A,B,B,A,B,B,A,B,A,A,-,A,A,B,B,A,B,A,A,B,B,A,A,B,A,A,A,A,A,A,A,A,B,B,B,A,B,B,A,B,B,A,A,A,A,A,B,A,A,A,A,A,B,A,B,A,B,B,B,A,B,-,B,A,B,A,A,-,-,A,A,B,A,A,A,A,A,B,B,-,A,A,B,A,B,B,B,B,B,B,A,B,B,A,B,A,A,A,-,-,B,A,A,A,A,A,B,A,A,A,B,B,B,A,A,B,A,A,B,B,A,B,A,A,A,B,B,A,-,B,-,A,A,B,A,A,-,A,A,A,B,B,A,B,A,A,B,B,A,A,A,B,-,B,A,A,B
S26_3507091,,-,A,-,B,B,A,A,B,-,-,B,A,A,B,-,A,B,B,A,B,A,A,-,A,A,B,B,-,B,A,A,B,B,A,A,B,A,-,A,A,A,A,A,A,B,B,B,A,B,-,A,B,B,A,A,A,A,A,B,A,B,A,A,A,B,-,B,A,B,B,B,A,B,-,B,A,B,A,A,-,-,A,A,-,A,A,-,A,A,B,B,B,A,A,B,A,-,B,B,B,-,B,A,B,B,A,B,A,-,A,B,-,B,A,A,A,A,A,B,-,A,A,B,B,B,A,A,B,-,-,B,B,A,B,A,-,A,B,-,A,-,B,-,A,A,B,A,A,-,A,A,-,A,B,A,-,A,-,B,B,A,A,A,B,-,B,A,A,-
S26_3513222,,-,A,-,B,B,A,A,B,B,B,B,A,A,B,B,A,B,B,A,B,A,A,B,A,A,B,B,A,B,A,A,B,B,A,A,B,A,A,A,A,A,A,A,A,B,B,B,A,B,B,A,B,B,A,A,A,A,A,B,A,B,A,A,A,B,A,B,A,B,B,B,A,B,B,B,A,B,A,A,-,-,A,A,B,A,A,A,A,A,B,B,-,A,A,B,A,B,B,B,B,B,B,A,B,B,A,B,A,A,A,B,-,B,A,A,A,A,A,B,A,A,A,B,B,B,A,A,B,A,-,B,B,A,B,A,A,A,B,B,A,-,B,-,A,A,B,A,A,-,A,A,A,A,B,A,B,A,A,B,B,A,A,A,B,-,B,A,A,B
S26_3538465,,-,A,-,B,-,A,-,B,B,-,B,-,A,B,-,A,B,B,A,B,A,A,-,A,A,B,B,-,B,A,A,B,-,A,A,B,A,-,A,A,A,A,A,A,B,B,B,A,B,B,-,B,B,A,A,A,A,A,B,A,B,A,-,A,B,-,B,A,B,B,B,A,-,-,B,A,B,A,A,-,-,A,A,B,A,A,-,A,A,B,-,-,A,A,B,A,B,B,B,B,B,B,A,B,B,A,B,A,A,A,B,-,B,A,A,A,A,A,B,A,A,A,B,B,B,A,A,B,-,-,B,B,A,B,A,-,A,-,-,A,-,B,-,A,-,B,A,A,-,A,A,-,A,B,A,B,A,A,B,B,A,A,A,B,-,B,A,A,B
S26_3560818,,-,A,-,B,B,A,A,B,B,-,B,A,A,B,-,A,B,B,A,B,A,A,-,A,A,B,B,A,B,A,A,-,B,A,A,B,A,A,A,A,A,A,A,A,-,-,B,A,B,B,A,-,B,A,A,A,A,A,B,A,B,A,-,A,B,A,B,A,B,-,B,A,B,-,B,A,B,A,A,-,-,A,A,B,A,A,A,A,A,B,B,-,A,A,B,A,B,B,B,B,B,B,A,B,B,A,B,A,A,A,B,-,B,A,A,A,A,A,B,A,A,A,B,B,B,A,A,B,A,A,B,B,A,B,A,A,A,B,-,A,-,B,-,A,A,B,A,A,-,A,A,A,A,B,A,B,A,A,B,B,A,A,A,B,-,B,A,A,B
S26_3596401,,-,A,-,B,B,A,A,B,B,B,B,A,A,B,-,A,B,B,A,B,A,A,B,A,A,B,B,A,B,A,A,B,B,A,A,B,A,A,A,A,A,A,A,A,B,B,B,A,B,B,A,B,B,A,A,A,A,A,B,A,B,A,A,A,B,A,B,A,B,B,A,A,B,B,B,A,B,A,A,-,-,A,A,B,A,A,A,A,A,B,B,-,A,A,B,A,B,B,B,B,B,B,A,B,B,A,B,A,A,A,B,A,B,A,A,A,A,A,B,A,A,A,B,B,B,A,A,B,A,-,B,B,A,B,A,A,A,B,B,A,-,B,-,A,A,B,A,A,-,A,A,A,A,B,A,B,A,A,B,B,A,A,A,B,-,B,A,A,B
S27_13086,,-,B,-,A,A,A,B,A,-,-,B,A,B,B,B,B,B,A,A,A,B,B,-,A,B,B,A,A,A,-,A,B,B,A,B,B,B,B,A,B,A,B,A,B,-,B,A,B,A,B,B,A,A,A,A,B,A,B,A,B,B,A,-,A,A,-,A,A,B,B,B,A,B,B,A,A,A,A,B,-,-,A,-,B,A,A,B,A,A,A,A,A,B,A,A,B,A,B,A,B,B,B,-,B,B,B,A,A,B,A,-,-,A,A,A,A,A,B,A,B,A,-,A,B,B,B,A,B,B,B,B,B,B,A,A,B,A,A,A,B,A,B,-,B,A,B,B,A,-,B,B,A,B,B,B,A,B,B,B,B,B,B,B,A,-,A,B,B,-
S27_18022,,-,B,-,A,A,A,-,A,B,A,B,A,B,B,B,B,B,A,A,A,B,B,B,A,B,B,A,A,A,A,A,B,B,A,B,B,B,B,A,B,A,B,A,B,A,B,A,B,A,B,B,A,A,A,A,B,A,B,A,B,B,A,A,A,A,-,A,A,B,B,B,A,B,B,A,A,A,A,B,-,-,-,A,B,A,A,B,A,A,A,-,A,B,A,A,B,A,B,A,B,B,B,-,B,B,B,A,A,B,A,B,-,A,-,A,A,A,B,A,B,A,A,A,B,B,B,A,B,B,B,B,B,B,A,A,B,A,A,-,B,A,B,-,B,A,B,B,A,-,B,B,A,B,B,B,A,B,B,B,B,B,B,B,A,-,A,B,B,A
S27_35922,,-,A,-,A,A,A,B,A,B,A,B,A,B,B,B,B,B,A,A,A,B,B,B,A,B,B,A,A,A,A,A,B,B,A,B,B,B,B,A,B,A,B,A,B,A,B,A,B,A,B,B,A,A,A,A,B,A,B,A,B,B,A,A,A,A,A,A,A,B,B,B,A,B,B,A,A,A,A,B,-,-,A,A,B,B,A,-,B,A,A,A,A,B,A,A,B,A,B,A,B,B,B,-,B,B,B,A,A,B,A,B,A,A,-,A,A,A,B,A,B,A,A,A,B,B,B,A,B,B,B,B,B,B,A,A,B,A,A,A,B,A,B,-,B,A,B,B,A,-,B,B,A,B,B,B,A,B,B,B,B,B,B,-,A,-,A,B,B,A
S27_62602,,-,A,-,A,A,A,B,A,-,A,B,A,B,-,-,B,B,A,A,A,B,B,-,A,B,B,A,A,A,A,A,-,-,A,-,-,B,B,A,B,A,-,A,B,A,B,A,-,A,-,B,-,A,A,A,B,A,B,A,B,-,A,A,A,A,A,A,A,B,B,B,A,-,-,A,A,A,A,-,A,A,A,A,-,B,A,A,B,A,A,A,A,B,A,A,B,A,B,A,-,B,B,A,B,B,-,A,A,B,A,B,-,A,A,A,A,A,B,A,B,A,A,A,B,B,B,A,B,-,B,B,B,-,A,A,A,A,A,A,B,A,B,-,-,A,-,B,A,-,B,B,A,B,B,B,B,B,B,B,B,B,B,A,A,-,A,-,B,A
S27_68237,,-,A,-,A,A,A,B,A,B,A,B,A,B,B,B,B,B,A,A,A,B,B,B,A,B,B,A,A,A,A,A,B,B,A,B,B,B,B,A,B,A,B,A,B,A,B,A,B,A,B,B,B,A,A,A,B,A,B,A,B,B,A,A,A,A,A,A,A,B,B,B,A,B,B,A,A,A,A,B,A,-,A,A,B,B,A,-,B,A,A,A,A,B,A,A,B,A,B,A,B,B,B,-,B,B,B,A,A,B,A,B,A,A,-,A,A,A,B,A,B,A,A,A,B,B,B,A,B,B,B,B,B,B,A,A,A,A,A,A,B,A,B,-,B,A,B,B,A,-,B,B,A,B,B,B,B,B,B,B,B,B,B,-,A,-,A,B,B,A
S27_70813,,B,A,-,A,A,A,B,A,B,A,B,A,B,B,B,B,B,A,A,A,B,B,-,A,B,B,A,A,A,A,A,B,B,A,B,B,B,B,A,B,A,B,A,B,A,B,A,B,A,B,B,B,A,A,A,B,A,B,A,B,B,A,A,A,A,A,A,A,B,B,B,A,B,B,A,A,A,A,B,A,-,A,A,B,B,A,-,B,A,A,-,A,B,A,A,B,A,B,A,B,B,B,-,B,B,B,A,A,B,A,B,A,A,-,A,A,A,B,A,B,A,A,A,B,B,B,A,B,B,B,B,B,B,A,A,A,A,A,A,B,A,B,-,B,A,B,B,A,-,B,B,A,A,B,B,B,B,B,B,B,B,B,-,A,-,A,B,B,A
S27_75905,,-,A,-,A,A,A,B,A,B,A,B,-,B,B,B,B,B,A,A,A,B,B,-,A,B,B,A,A,A,A,A,B,B,A,B,B,B,B,A,B,A,B,A,B,A,B,A,B,A,B,B,B,A,A,A,B,A,B,A,B,B,A,A,A,A,A,A,A,B,B,B,A,B,-,A,A,A,A,B,A,-,A,A,B,B,A,A,B,A,A,A,A,B,A,A,B,A,B,A,B,B,B,-,B,B,B,A,A,B,A,B,A,A,-,A,A,A,B,A,B,A,A,A,B,B,B,A,B,B,B,B,B,B,A,A,-,A,A,-,B,A,B,-,B,A,B,B,A,-,B,B,A,A,B,B,B,B,B,B,B,B,B,-,A,-,A,B,B,A
S27_77223,,-,A,-,A,-,A,B,A,B,A,B,A,B,B,B,B,B,A,A,A,B,B,B,A,B,B,A,A,A,A,A,B,B,A,B,B,B,B,A,B,A,B,A,B,A,B,A,B,A,B,B,B,A,A,A,B,A,B,A,B,B,A,-,A,A,A,A,A,B,B,B,A,B,-,A,A,A,A,B,B,-,A,A,B,B,A,-,B,A,A,-,A,B,A,A,B,A,B,A,B,B,B,-,B,B,B,A,A,B,A,B,A,A,-,A,A,A,B,-,B,A,A,A,B,B,B,A,B,B,B,B,B,B,A,A,A,A,A,A,B,A,B,-,B,A,B,B,A,B,B,B,A,A,B,B,B,B,B,B,B,B,B,A,A,-,A,B,B,A
S27_99346,,-,A,-,A,A,A,B,A,B,A,B,A,B,B,B,B,B,A,A,A,B,B,B,A,B,B,A,A,A,A,A,B,B,A,B,B,B,B,A,B,A,B,A,B,A,B,A,B,A,B,B,B,A,A,A,B,A,B,A,B,B,A,A,A,A,A,A,A,B,B,B,A,B,-,A,A,A,A,B,-,-,A,A,B,B,A,-,B,A,A,A,A,B,A,A,B,A,B,A,B,B,B,-,B,B,B,A,A,B,A,B,-,A,-,A,A,A,B,A,B,A,A,A,B,B,B,A,B,B,B,B,B,B,A,A,A,A,A,A,B,A,B,-,B,A,B,B,A,-,B,B,A,A,B,B,B,B,B,B,B,B,B,-,A,-,A,B,B,A
S27_116291,,-,A,-,A,A,A,B,A,B,A,B,A,B,B,B,B,B,A,A,A,B,B,-,A,B,B,A,A,A,A,A,B,B,A,B,B,B,B,A,B,A,B,A,B,A,B,A,B,A,B,B,B,A,A,A,B,A,B,A,B,B,A,-,A,A,A,A,A,B,B,B,A,B,-,A,A,A,A,B,-,-,A,A,B,B,A,-,B,A,A,A,A,B,A,A,B,A,B,A,B,B,B,-,B,B,B,A,A,B,A,B,A,A,-,A,A,A,B,A,B,A,A,A,B,B,B,A,B,B,B,B,B,B,A,A,A,A,A,-,B,A,B,-,B,A,B,B,A,-,B,B,A,A,B,B,B,B,B,B,B,B,B,-,A,-,A,B,B,A
S27_118393,,-,A,-,-,A,A,B,A,B,A,B,A,B,B,B,B,B,A,A,A,B,B,-,A,B,B,A,-,A,A,-,B,B,A,B,B,B,B,A,B,A,B,A,B,-,B,A,B,A,B,B,B,A,A,A,B,A,B,A,B,B,A,-,A,A,A,A,A,B,B,B,A,B,-,A,A,A,A,B,A,B,-,A,B,B,A,-,B,A,A,A,A,B,A,A,B,A,B,A,B,B,B,-,B,B,B,A,A,B,A,B,-,A,B,A,A,A,B,A,B,A,A,A,B,B,B,A,B,B,B,B,B,B,A,A,-,A,A,-,B,A,B,-,B,-,B,B,A,-,B,B,A,A,B,B,B,B,B,B,B,B,B,-,A,-,A,B,B,-
S27_186690,,-,A,-,A,A,A,B,A,B,A,B,A,B,B,B,B,B,A,A,A,B,B,-,A,B,B,A,A,A,A,A,B,B,A,B,B,B,B,A,B,A,B,A,A,A,B,A,B,A,B,B,B,A,A,A,B,A,B,A,B,B,A,A,A,A,A,A,A,B,B,B,A,B,-,A,A,A,A,B,-,-,A,A,B,B,A,A,B,A,A,A,A,B,A,A,B,-,B,A,B,B,B,-,B,B,B,A,A,B,A,B,-,B,-,A,A,A,B,A,B,A,A,A,B,B,B,A,B,B,B,B,B,B,A,A,A,A,A,A,B,A,B,-,B,A,B,B,A,-,B,B,A,A,B,B,B,B,B,B,B,B,B,-,A,-,A,B,B,A
S27_211368,,-,A,-,A,-,A,B,A,B,A,B,-,B,B,B,B,B,A,A,A,B,B,-,A,B,B,A,-,A,A,A,B,-,A,B,B,B,-,A,B,A,B,A,A,A,B,A,B,A,B,B,B,A,A,A,B,A,B,A,B,B,A,-,A,A,A,A,A,B,B,B,A,B,B,A,A,A,A,B,-,B,A,A,B,B,A,-,B,A,A,A,A,B,A,A,B,-,B,A,B,B,B,A,B,B,B,A,A,B,A,B,-,B,A,A,-,A,B,-,-,A,A,A,B,B,B,A,B,B,B,B,B,B,A,A,-,A,A,-,B,A,B,-,B,A,B,B,A,-,B,B,-,A,B,B,B,B,-,B,B,B,B,A,A,-,A,B,B,A
S27_216167,,-,A,-,A,A,A,B,A,B,A,B,A,B,B,B,B,B,A,A,A,B,B,B,A,B,B,A,A,A,A,A,B,B,A,B,B,B,B,A,B,A,B,A,A,A,B,A,B,A,B,B,B,A,A,A,B,A,B,A,B,B,A,A,A,A,A,A,A,B,B,B,A,B,B,A,A,A,A,B,-,-,A,A,B,B,A,-,B,A,A,A,A,B,A,A,B,B,B,A,B,B,B,-,B,B,B,A,A,B,-,B,A,B,-,A,A,A,B,A,B,A,A,A,B,B,B,A,B,B,B,B,B,B,A,A,A,A,A,A,B,A,B,A,B,A,B,B,A,-,B,B,A,A,B,B,B,B,B,B,B,B,B,-,A,-,A,B,B,A
S27_218160,,-,A,-,A,A,A,B,A,B,A,B,A,B,B,B,B,B,A,A,A,B,B,B,A,B,B,A,A,A,A,A,B,B,A,B,B,B,B,A,B,A,B,A,A,A,B,A,B,A,B,B,B,A,A,A,B,A,B,A,B,B,A,A,A,A,A,A,A,B,B,B,A,B,-,A,A,A,A,B,A,-,A,A,B,B,A,-,B,A,A,-,A,B,A,A,B,B,B,A,B,B,B,-,B,B,B,A,A,B,-,B,-,B,-,A,A,A,B,A,B,A,A,A,B,B,B,A,B,B,B,B,B,B,A,A,A,A,A,A,B,A,B,-,B,A,B,B,A,-,B,B,A,A,B,B,B,B,B,B,B,B,B,-,A,B,A,B,B,A
S27_226615,,-,A,-,A,A,A,B,A,B,A,B,A,B,B,B,B,B,A,A,A,B,B,-,A,B,B,A,A,A,A,A,B,B,A,B,B,B,B,A,B,A,B,A,A,A,B,A,B,A,B,B,B,A,A,A,B,A,B,A,B,B,A,A,A,A,A,A,A,B,B,B,A,B,B,A,A,A,A,B,-,-,A,A,B,B,A,-,B,A,A,A,A,B,A,A,B,B,B,A,B,B,B,-,B,B,B,A,A,B,-,B,-,B,-,A,A,A,B,A,B,A,A,A,B,B,B,A,B,-,B,B,B,B,A,A,A,A,A,A,B,A,B,-,B,A,B,B,A,-,B,B,A,A,B,B,B,B,B,B,B,B,B,-,A,-,A,B,B,A
S27_235641,,-,A,-,A,A,A,B,A,B,A,B,A,B,B,B,B,B,A,A,A,B,B,B,A,B,B,A,A,A,A,A,B,B,A,B,B,B,B,A,B,A,B,A,A,A,B,A,B,A,B,B,B,A,A,A,B,A,B,A,B,B,A,A,A,A,A,A,A,B,B,B,A,B,-,A,A,A,A,B,A,-,A,A,B,B,A,-,B,A,A,A,A,B,A,A,B,B,B,A,B,B,B,-,B,B,B,A,A,B,-,B,-,B,-,A,A,A,B,A,B,A,A,A,B,B,A,A,B,B,B,B,B,B,A,A,A,A,A,A,B,A,B,-,B,A,B,B,A,-,B,B,A,A,B,B,B,B,B,B,B,B,B,-,A,-,A,B,B,A
S27_241275,,-,A,-,A,-,A,B,A,B,A,B,-,B,B,B,B,B,A,A,A,B,B,B,A,B,B,A,A,A,A,A,B,B,A,B,B,B,B,A,B,A,B,A,A,-,B,A,B,A,B,B,B,A,A,A,B,A,B,A,B,B,A,A,A,A,A,A,A,B,B,B,A,B,-,A,A,A,A,B,-,-,A,A,-,B,A,-,B,A,A,A,A,B,A,A,B,B,B,A,B,B,B,B,B,B,B,A,A,B,-,B,-,B,-,A,A,A,B,A,B,A,A,A,B,B,A,A,B,B,B,B,B,B,A,-,A,A,A,-,B,A,B,-,B,A,B,B,A,-,B,B,A,A,B,B,B,B,B,B,B,B,B,-,A,-,A,B,B,A
S27_244684,,-,A,-,A,A,A,B,A,B,A,B,A,B,B,B,B,B,A,A,A,B,B,B,A,B,B,A,A,A,A,A,B,B,A,B,B,B,B,A,B,A,B,A,A,A,B,A,B,A,B,B,B,A,A,A,B,A,B,A,B,B,A,A,A,A,A,A,A,B,B,B,A,B,B,A,A,A,A,B,-,-,A,A,B,B,A,-,B,A,A,-,A,B,A,A,B,B,B,A,B,B,B,-,B,B,B,A,A,B,-,B,-,B,-,A,A,A,B,A,B,A,A,A,B,B,A,A,B,B,B,B,B,B,A,A,A,A,A,A,B,A,B,-,B,A,B,B,A,-,B,B,A,A,B,B,B,B,B,B,B,B,B,-,A,-,A,B,B,A
S27_245871,,-,A,-,A,A,A,B,A,B,A,B,A,B,B,B,B,B,A,A,A,B,B,B,A,B,B,A,-,A,A,A,B,B,A,B,B,B,B,A,B,A,B,A,A,A,B,A,B,A,B,B,B,A,A,A,B,A,B,A,B,B,A,A,A,A,A,A,A,B,B,B,A,B,-,A,A,A,A,B,A,-,A,A,B,B,A,A,B,A,A,-,A,B,A,A,B,B,B,A,B,B,B,-,B,B,B,A,A,B,-,B,-,B,-,A,A,A,B,A,B,A,A,A,B,B,A,A,B,B,B,B,B,B,A,A,A,A,A,A,B,A,B,-,B,A,B,B,A,-,B,B,A,A,B,B,B,B,B,B,B,B,B,-,A,-,A,B,B,A
S27_264369,,-,A,-,A,A,A,B,A,B,A,B,A,B,B,B,B,B,A,A,A,B,B,B,A,B,B,A,A,A,A,A,B,B,A,B,B,B,B,A,B,A,B,A,A,A,B,A,B,A,B,B,B,A,A,A,B,A,B,A,B,B,A,A,A,A,A,A,A,B,B,B,A,B,B,A,A,A,A,B,A,-,A,A,B,B,A,-,B,A,A,A,A,B,A,A,B,B,B,A,B,B,B,-,B,B,B,A,A,B,-,B,A,B,-,A,A,A,B,A,B,A,A,A,B,B,A,A,B,B,B,B,B,B,A,A,A,A,A,A,B,A,B,-,B,A,B,B,A,-,B,B,A,A,B,B,B,B,B,B,B,B,B,-,A,-,A,B,B,A
S27_272603,,-,A,-,A,A,A,B,A,B,A,B,A,B,B,B,B,B,A,A,A,B,B,B,A,B,B,A,A,A,A,A,B,B,A,B,B,B,-,A,B,A,B,A,A,A,B,A,B,A,B,B,B,A,A,A,B,A,B,A,B,B,A,-,A,A,A,A,A,B,B,B,A,B,-,A,A,A,A,B,-,-,A,A,B,B,A,-,B,A,A,A,A,B,A,A,B,B,B,A,B,B,B,-,B,B,B,A,A,B,-,B,A,B,-,A,A,A,B,A,B,A,A,A,B,B,A,A,B,B,B,B,B,B,A,A,A,A,A,A,B,A,B,-,B,A,B,B,A,-,B,B,A,A,B,B,B,B,B,B,B,B,B,-,A,-,A,B,B,A
S27_275708,,B,A,-,A,A,A,-,A,B,A,B,A,B,B,B,B,B,A,A,A,B,B,-,A,B,B,A,A,A,A,A,B,B,A,B,B,B,B,A,B,A,B,A,A,A,B,A,B,A,B,B,B,A,A,A,B,A,B,A,B,B,A,-,A,A,A,A,A,B,B,B,A,B,-,A,A,A,A,B,-,-,A,A,B,B,A,-,B,A,A,A,A,B,A,A,B,B,B,A,B,B,B,-,B,B,B,A,A,B,-,B,-,B,-,A,A,A,B,A,B,A,A,A,B,B,A,A,B,B,B,B,B,B,A,A,A,A,A,A,B,A,B,-,B,A,B,B,A,-,B,B,-,A,B,B,B,B,B,B,B,B,B,-,A,-,A,B,B,A
S27_283275,,-,A,-,A,A,A,B,A,B,A,B,A,B,B,B,B,B,A,A,A,B,B,-,A,B,B,A,A,A,A,A,B,B,A,B,B,B,B,A,B,A,B,A,A,A,B,A,B,A,B,B,B,A,A,A,B,A,B,A,B,B,A,A,A,A,A,A,A,B,B,B,A,B,-,A,A,A,A,B,A,-,A,A,B,B,A,-,B,A,A,A,A,B,A,A,B,B,B,A,B,B,B,-,B,B,B,A,A,B,-,B,A,B,-,A,A,A,B,A,B,A,A,A,B,B,A,A,B,B,B,B,B,B,A,A,A,A,A,A,B,A,B,-,B,A,B,B,A,-,B,B,A,A,B,B,B,B,B,B,B,B,B,-,A,-,A,B,B,A
S27_288570,,-,A,B,A,A,A,B,A,B,A,B,A,B,B,B,B,B,A,A,A,B,B,-,A,B,B,A,A,A,A,A,B,B,A,B,B,B,B,A,B,A,B,A,A,A,B,A,B,A,B,B,B,A,A,A,B,A,B,A,B,B,A,A,A,A,A,A,A,B,B,B,A,B,B,A,A,A,A,B,A,-,A,A,B,B,A,-,B,A,A,A,A,B,A,A,B,B,B,A,B,B,B,-,B,B,B,A,A,B,-,B,A,B,-,A,A,A,B,A,B,A,A,A,B,B,A,A,B,B,B,B,B,B,A,A,A,A,A,A,B,A,B,-,B,A,B,B,A,-,B,B,A,A,B,B,B,B,B,B,B,B,B,-,A,-,A,B,B,A
S27_289933,,B,A,B,A,A,A,B,A,B,A,B,A,B,B,B,B,B,A,A,A,B,B,-,A,B,B,A,A,A,A,A,B,B,A,B,B,B,B,A,B,A,B,A,A,A,B,A,B,A,B,B,B,A,A,A,B,A,B,A,B,B,A,A,A,A,A,A,A,B,B,B,A,B,-,A,A,A,A,B,-,-,A,A,B,B,A,A,B,A,A,-,A,B,A,A,B,B,B,A,B,B,B,-,B,B,B,A,A,B,-,B,-,B,-,A,A,A,B,A,B,A,A,A,B,B,A,A,B,B,B,B,B,B,A,A,-,A,A,A,B,A,B,-,B,A,B,B,A,-,B,B,A,A,B,B,B,B,B,B,B,B,B,-,A,-,A,B,B,A
S27_299187,,-,A,-,A,A,A,B,A,B,A,B,A,B,B,B,B,B,A,A,A,B,B,-,A,B,B,A,A,A,A,A,B,B,A,-,B,B,B,A,B,A,B,A,A,-,B,A,B,A,B,B,B,A,A,A,B,A,B,A,B,B,A,-,A,A,-,A,A,B,B,B,A,B,B,A,A,A,A,B,-,-,A,A,B,B,A,A,B,A,A,-,A,B,A,A,B,B,B,A,B,B,B,-,B,B,B,A,A,-,-,B,-,B,-,A,-,A,B,A,B,B,A,A,B,B,A,A,B,B,B,B,B,B,A,A,-,A,A,-,B,A,B,-,B,A,B,B,A,-,B,B,A,A,B,B,B,B,B,B,B,B,B,A,A,-,A,B,B,A
S27_303369,,-,A,-,A,A,A,B,A,B,A,B,A,B,B,B,B,B,A,A,A,B,B,-,A,B,B,A,A,A,A,A,B,B,A,B,B,B,B,A,B,A,B,A,A,A,B,A,B,A,B,B,B,A,A,A,B,A,B,A,B,B,A,A,A,A,A,A,A,B,B,B,A,B,-,A,A,A,A,B,A,-,A,A,B,B,A,-,B,A,A,A,A,B,A,A,B,B,B,A,B,B,B,-,B,B,B,A,A,B,-,B,A,B,-,A,A,A,B,A,B,B,A,A,B,B,A,A,B,B,B,B,B,B,A,A,A,A,A,A,B,A,B,-,B,A,B,B,A,-,B,B,A,A,B,B,B,B,B,B,B,B,B,-,A,-,A,B,B,A
S27_313144,,-,A,-,A,A,A,B,A,B,A,B,A,B,B,B,B,B,A,A,A,B,B,-,A,B,B,A,A,A,A,A,B,B,A,B,B,B,B,A,B,A,B,A,A,A,B,A,B,A,B,B,B,A,A,A,B,A,B,A,B,B,A,A,A,A,A,A,A,B,B,B,A,B,-,A,A,A,A,B,-,-,A,A,B,B,A,-,B,A,A,A,A,B,A,A,B,B,B,A,B,B,B,-,B,B,B,A,A,B,-,B,-,B,-,A,A,A,B,A,B,B,A,A,B,B,A,A,B,B,B,B,B,B,A,A,A,A,A,A,B,A,B,-,B,A,B,B,A,-,B,B,A,A,B,B,B,B,B,B,B,B,B,A,A,-,A,B,B,A
S27_331817,,B,A,-,A,A,A,B,A,B,A,B,A,B,B,B,B,B,A,A,A,B,B,B,A,B,B,A,A,A,A,A,B,B,A,B,B,B,B,A,B,A,B,A,A,A,B,A,B,A,B,B,B,A,A,A,B,A,B,A,B,B,A,A,A,A,A,A,A,B,B,B,A,B,-,A,A,A,A,B,A,-,A,A,B,B,A,-,B,A,A,-,A,B,A,A,B,B,B,A,B,B,B,-,B,B,B,A,A,B,-,B,A,B,-,A,A,A,B,A,B,B,A,A,B,B,A,A,B,B,B,B,B,B,A,A,A,A,A,-,B,A,B,-,B,A,B,B,A,-,B,B,A,A,B,B,B,B,B,B,B,B,B,-,A,-,A,B,B,A
S27_353460,,-,A,-,A,A,A,B,A,B,A,B,A,B,B,B,B,B,A,A,A,B,B,-,A,B,B,A,A,A,A,A,B,B,A,B,B,B,B,A,B,A,B,A,A,A,B,A,B,A,B,B,B,A,A,A,B,A,B,A,B,B,A,A,A,A,A,A,A,B,B,B,A,B,-,A,A,A,A,B,-,A,A,A,B,B,A,A,B,A,A,A,A,B,A,A,B,B,B,A,B,B,B,-,B,B,B,A,A,B,-,B,-,B,-,-,A,A,B,A,-,B,A,A,B,B,A,A,B,B,B,B,B,B,A,A,A,A,A,-,B,A,B,-,B,A,B,B,A,-,B,B,A,A,B,B,B,B,B,B,B,B,B,-,A,-,A,B,B,A
S27_389620,,-,A,-,A,-,A,B,A,B,A,B,-,B,B,-,B,B,A,A,A,B,B,-,A,-,B,A,A,A,A,A,-,-,A,B,B,B,B,A,B,A,-,A,A,A,B,A,-,A,B,B,B,A,A,A,B,A,B,A,B,-,A,-,A,A,A,-,A,B,A,B,A,B,B,A,A,A,A,B,-,B,A,A,B,B,A,-,-,A,A,A,A,B,A,A,B,B,A,A,B,-,B,B,B,B,B,-,A,B,-,B,-,B,B,A,-,A,B,A,B,B,A,A,B,B,A,A,B,-,B,B,B,B,A,-,A,A,-,-,B,A,B,-,B,A,B,B,A,-,B,B,-,A,B,B,B,B,-,B,B,B,-,B,A,-,A,B,B,A
S27_396151,,-,A,-,A,A,A,B,A,B,A,B,A,B,B,-,B,B,A,A,A,B,B,-,A,B,B,A,A,A,A,A,B,-,A,B,B,B,B,A,B,A,B,A,A,A,B,A,B,A,B,B,B,A,-,A,B,A,B,A,B,B,A,-,A,A,A,A,A,B,A,B,A,B,-,A,A,A,A,B,A,B,A,A,B,B,A,-,-,A,A,A,A,B,A,A,A,B,A,A,B,B,B,-,B,B,B,A,A,B,-,B,-,B,-,A,A,A,B,A,B,B,A,A,B,B,A,A,B,-,B,B,B,B,A,A,-,A,A,-,B,A,B,-,B,A,B,B,A,-,B,B,A,A,B,B,B,B,B,B,B,B,B,-,A,-,A,B,B,A
S27_415466,,B,A,-,A,A,A,-,A,B,A,B,A,B,B,B,B,B,A,A,A,B,B,-,A,B,B,A,A,A,A,A,B,B,A,B,B,B,-,A,B,A,B,A,A,-,B,A,B,A,B,B,B,A,A,A,B,A,B,A,B,B,A,A,A,A,A,A,A,B,A,B,A,B,B,A,A,A,A,B,-,-,A,A,B,B,A,-,B,A,A,-,A,B,A,A,A,B,A,A,B,B,B,-,B,B,B,A,A,B,B,B,-,B,-,A,A,A,B,A,B,B,A,A,B,B,A,A,B,B,B,B,B,B,A,A,A,A,A,A,B,A,B,-,B,A,B,B,A,-,B,B,A,A,B,B,B,B,B,B,B,B,B,A,A,-,A,B,B,A
S27_417241,,-,A,-,A,A,A,B,A,B,A,B,A,B,B,B,B,B,A,A,A,B,B,B,A,B,B,A,A,A,A,A,B,B,A,B,B,B,B,A,B,A,B,A,A,A,B,A,B,A,B,B,B,A,A,A,B,A,B,A,B,B,A,A,A,A,A,A,A,B,A,B,A,B,B,A,A,A,A,B,-,-,A,A,B,B,A,-,B,A,A,-,A,B,A,A,A,B,A,A,B,B,B,-,B,B,B,A,A,B,-,B,A,B,-,A,A,A,B,A,B,B,A,A,B,B,A,A,B,B,B,B,B,B,A,A,A,A,A,A,B,A,B,-,B,A,B,B,A,-,B,B,A,A,B,B,B,B,B,B,B,B,B,-,A,-,A,B,B,A
S27_439179,,-,A,-,A,A,A,B,A,B,A,B,A,B,B,B,B,B,A,A,A,B,B,-,A,B,B,A,A,A,A,A,B,B,A,B,B,B,B,A,B,A,B,A,A,A,B,A,B,A,B,B,B,A,A,A,B,A,B,A,B,B,A,A,A,A,A,A,A,B,A,B,A,B,-,A,A,A,A,B,-,-,A,A,B,B,A,-,B,A,A,-,A,B,A,A,A,B,A,A,B,B,B,-,B,B,B,A,A,B,-,B,A,B,-,A,A,A,B,A,B,B,A,A,B,B,A,A,B,B,B,B,B,B,A,A,A,A,A,A,B,A,B,-,B,A,B,B,A,-,B,B,A,A,B,B,B,B,B,B,B,B,B,-,A,-,A,B,B,A
S27_442858,,-,A,-,-,A,A,B,A,B,A,B,-,B,B,-,B,B,A,A,A,B,B,-,A,B,B,A,-,A,A,A,B,-,A,B,B,B,B,A,B,A,B,A,A,-,B,A,B,A,B,-,-,A,A,A,B,A,B,A,B,B,A,-,A,A,A,A,A,B,A,B,A,B,-,A,A,A,A,B,-,A,A,A,B,-,-,A,B,A,A,-,A,B,A,A,-,B,A,-,-,B,B,B,B,B,B,A,A,B,B,-,-,B,-,-,-,A,B,A,B,B,A,A,B,B,A,A,B,B,-,B,B,B,-,A,A,A,A,-,B,A,B,-,B,A,B,B,A,-,B,B,A,A,B,B,B,B,B,B,B,B,B,A,A,-,A,B,B,A
S28_39590,,-,B,-,A,A,B,B,A,B,B,B,-,B,B,A,B,A,A,B,B,B,B,A,A,B,B,B,A,B,-,B,A,-,B,B,B,B,A,A,B,A,A,B,A,A,B,A,B,A,B,A,B,B,A,A,B,A,B,B,A,B,B,-,A,B,A,B,-,-,B,B,B,A,B,B,B,B,A,B,-,B,B,A,A,A,-,B,A,B,B,B,A,B,B,B,B,A,B,B,B,B,A,A,A,B,-,B,A,B,B,B,-,A,B,B,B,A,A,A,B,A,B,B,A,A,B,B,A,B,A,B,B,B,B,B,A,A,B,A,A,A,B,-,A,B,A,B,B,-,A,B,B,A,B,B,B,-,B,B,A,A,A,A,A,-,A,A,B,B
S28_181874,,-,A,-,A,B,B,A,A,B,-,B,A,B,-,B,B,A,A,A,A,B,B,-,B,B,B,B,-,B,B,B,A,B,A,B,A,B,B,A,A,A,A,-,B,-,A,A,B,A,A,B,A,B,A,A,B,B,B,B,A,B,B,B,B,B,A,A,A,B,A,B,A,B,A,B,A,B,A,B,-,-,A,B,B,B,B,B,B,A,B,B,B,B,B,B,A,B,A,A,B,A,B,A,A,B,A,A,B,A,A,A,-,B,B,A,B,B,B,A,A,A,B,A,A,A,B,B,A,B,-,B,B,-,A,-,-,B,B,-,A,A,B,-,B,A,B,A,B,-,B,A,-,A,A,A,A,A,A,A,B,B,-,A,A,-,B,B,B,A
S28_264004,,-,A,-,A,B,B,-,-,B,B,B,-,B,-,B,B,A,A,A,A,B,B,B,B,B,B,B,A,B,B,B,A,B,A,B,A,B,B,A,A,-,A,-,B,B,A,A,B,A,A,B,A,B,A,A,B,B,B,B,A,B,B,B,B,B,-,B,A,B,A,B,A,B,-,B,A,B,A,B,B,-,A,B,B,B,B,B,B,A,B,B,B,B,B,B,A,B,-,A,B,A,B,A,A,B,A,A,B,-,A,A,-,B,B,-,B,B,B,A,-,A,B,A,A,A,B,B,A,B,A,B,B,-,-,A,A,B,B,-,-,A,B,-,B,A,B,A,B,-,B,A,B,A,A,-,-,A,-,A,B,B,B,A,A,-,B,B,B,A
S28_293096,,-,-,-,A,-,B,-,A,B,B,B,A,B,A,B,B,A,A,A,A,B,B,B,B,B,B,B,A,B,B,B,A,B,A,B,A,B,B,A,A,A,A,-,B,-,A,A,B,A,A,B,A,B,A,A,B,B,B,B,A,B,B,B,B,B,A,B,-,B,A,B,A,B,-,B,A,B,A,B,-,A,A,B,B,B,B,B,-,A,B,-,B,-,B,B,A,B,A,A,B,A,B,A,A,B,A,A,B,A,A,A,-,B,B,A,B,B,B,A,A,A,B,A,A,A,B,B,A,B,A,B,B,A,A,A,A,B,B,A,A,A,B,-,B,A,B,A,B,-,B,A,B,A,A,A,A,A,A,A,B,B,-,A,A,-,B,B,B,A
S28_380451,,-,A,-,A,B,B,A,A,B,B,B,A,B,A,B,B,A,A,A,A,B,B,B,B,B,B,B,A,B,B,B,A,B,A,B,A,B,B,A,A,A,A,-,B,B,A,A,B,A,A,B,A,B,A,A,B,B,B,B,A,B,B,-,B,B,A,-,A,B,A,B,A,B,-,B,A,B,A,B,B,A,A,B,B,B,B,B,B,A,B,-,B,B,B,B,A,B,-,A,B,A,B,A,A,B,A,A,B,A,A,A,-,B,B,A,B,B,B,A,A,A,B,A,A,A,B,B,A,-,A,B,B,-,A,A,-,B,B,-,A,A,B,-,B,-,B,A,B,-,B,A,B,A,A,A,A,A,A,A,B,B,-,A,A,-,B,B,B,A
S28_436492,,-,A,-,A,B,B,-,A,B,B,B,-,B,A,-,B,A,A,-,A,-,B,-,B,B,B,B,A,B,B,B,A,B,A,B,A,B,B,A,A,A,A,-,B,-,A,A,B,A,A,B,A,B,-,A,B,B,B,B,A,-,B,-,B,-,A,-,A,B,A,B,A,-,-,B,A,B,A,B,-,A,A,B,B,B,-,B,-,A,B,B,B,-,B,B,A,B,A,A,-,-,B,A,-,B,A,A,B,A,A,-,-,B,B,A,B,B,B,A,-,A,B,A,A,A,B,B,A,B,-,B,B,-,A,A,A,B,-,-,A,A,B,-,B,A,B,A,B,-,B,A,B,A,A,A,A,A,A,A,B,B,-,A,A,-,B,B,B,A
S29_852054,,-,A,-,B,B,A,A,A,B,B,B,A,B,B,A,A,A,A,A,B,B,A,B,A,B,B,B,B,B,A,-,A,A,A,A,B,A,A,A,A,B,A,A,B,B,B,B,A,B,B,A,B,A,A,A,B,A,A,B,A,B,A,-,A,A,-,A,A,B,B,-,A,A,A,A,A,B,A,A,-,B,A,A,A,A,A,A,-,B,B,A,A,A,A,-,A,B,B,B,B,A,B,A,B,A,A,B,A,A,A,B,-,A,A,B,A,B,A,A,-,B,B,B,B,B,A,A,B,A,B,A,A,A,B,A,-,A,B,-,A,B,B,-,A,B,A,A,A,-,A,B,-,B,B,A,B,B,B,A,B,B,B,B,B,-,A,B,A,B
S29_1032367,,-,A,-,A,B,A,A,A,B,A,B,A,A,A,A,A,A,A,B,A,A,A,-,B,B,A,A,B,A,A,A,B,A,A,A,-,A,-,A,A,A,A,A,A,A,B,B,A,A,B,B,A,A,A,A,A,A,A,A,B,A,A,A,B,B,B,A,B,A,B,A,B,A,-,A,A,A,A,A,-,B,A,A,A,B,A,A,B,B,B,-,B,B,B,A,A,-,B,A,A,A,A,A,A,B,A,A,A,A,A,A,A,A,B,-,A,A,A,B,B,B,B,A,A,A,A,A,A,B,A,B,A,A,A,B,-,A,A,-,B,A,A,-,A,A,A,B,A,-,A,A,B,B,A,A,B,-,A,B,B,B,A,A,-,-,A,B,B,A
S29_1337561,,-,A,-,A,-,A,A,A,-,-,B,B,A,A,-,A,A,B,A,A,A,A,-,B,B,A,A,A,A,-,A,B,A,A,A,A,A,-,A,-,A,-,A,A,-,B,-,A,A,B,B,A,-,A,A,A,A,A,A,B,A,B,-,B,B,B,A,B,A,B,A,B,A,-,A,A,A,A,B,-,B,A,A,A,A,A,B,B,B,B,A,B,-,B,A,A,A,B,A,A,A,A,A,A,A,-,A,A,A,A,A,-,A,B,B,A,A,A,B,B,B,B,A,A,A,A,A,A,-,A,A,A,-,A,B,-,-,A,-,B,-,A,-,A,A,A,B,A,-,A,A,B,A,A,-,B,B,A,B,B,B,A,-,A,-,A,B,-,-
S29_1407471,,-,-,-,A,B,A,A,A,-,-,B,-,A,A,A,A,-,B,A,A,A,A,-,B,B,-,A,A,A,A,A,B,A,A,A,A,-,A,A,A,A,A,A,A,-,B,B,A,A,B,B,A,-,A,A,A,A,A,A,B,-,B,-,B,B,B,A,-,A,B,A,B,A,-,-,A,A,A,B,-,-,A,A,A,A,A,B,B,B,B,-,B,A,B,A,A,A,B,A,A,A,B,A,A,A,A,A,A,-,A,A,-,A,B,A,A,A,A,-,B,B,B,A,A,A,-,A,A,B,A,A,A,A,A,B,A,-,-,-,B,A,A,-,A,A,A,B,A,-,A,A,B,A,-,-,B,B,A,B,B,B,A,A,A,-,A,-,-,B
S29_1414405,,-,A,-,-,B,A,A,A,B,A,B,B,A,A,-,A,A,B,-,A,A,A,-,B,B,A,A,A,A,A,A,B,A,A,A,A,A,A,A,A,A,A,A,A,A,B,B,-,A,B,B,A,A,A,A,A,A,-,A,B,A,B,A,B,B,B,A,B,A,B,A,B,A,-,A,A,A,A,B,-,B,A,A,A,A,-,B,-,B,B,A,B,A,B,A,A,A,B,A,A,A,B,A,A,A,A,A,A,A,A,A,-,A,B,A,A,A,A,B,B,B,B,A,A,A,A,A,A,B,A,A,A,A,A,B,A,A,A,A,B,-,A,-,A,A,A,B,A,-,A,A,B,A,A,-,B,B,A,B,B,B,A,A,-,-,A,B,B,B
S29_1556008,,-,A,-,A,A,A,A,A,B,A,B,B,A,A,A,A,A,B,A,A,A,A,A,B,B,A,A,A,A,A,A,B,A,A,A,A,B,A,A,A,B,A,A,A,B,B,B,A,A,B,B,A,A,A,A,A,A,A,A,B,A,B,B,B,B,B,A,B,A,B,A,B,A,-,A,A,A,A,B,-,B,A,A,B,A,A,B,A,B,B,A,A,A,B,A,A,A,B,A,A,A,A,A,A,A,A,A,A,A,A,A,-,A,B,B,A,A,A,B,B,B,B,A,A,-,A,A,A,B,A,A,A,A,A,B,A,A,A,A,B,A,A,-,A,A,A,B,A,-,A,A,B,A,A,A,B,B,A,B,B,B,A,A,-,-,A,B,A,B
S29_1561792,,-,A,A,A,A,A,A,A,B,A,B,B,A,A,A,A,A,B,A,A,A,A,A,B,B,A,A,A,A,A,A,B,A,A,A,A,B,A,A,A,B,A,A,A,B,B,B,A,A,B,B,A,A,A,A,A,A,A,A,B,A,B,B,B,B,B,A,B,A,B,A,B,A,A,A,A,A,A,B,-,B,A,A,B,A,A,B,A,B,B,A,A,A,B,A,A,A,B,A,A,A,A,A,A,A,A,A,A,A,A,A,-,A,B,B,A,A,A,B,B,B,B,A,A,-,A,A,A,B,A,A,A,A,A,B,A,A,A,A,B,-,A,-,A,A,A,B,A,-,A,A,B,A,A,A,B,B,A,B,B,B,A,A,-,-,A,B,A,B
S29_1617307,,-,A,-,A,A,A,A,A,B,A,B,B,A,B,-,A,A,B,A,A,A,A,-,B,B,A,A,A,A,A,A,B,A,A,A,A,B,A,A,A,B,A,A,A,B,B,B,A,A,B,B,A,A,A,A,A,A,A,A,B,A,B,B,B,B,B,A,B,A,B,A,B,A,A,A,A,A,A,B,-,B,A,A,B,A,A,B,A,B,B,A,A,A,B,A,A,A,B,A,A,A,A,A,A,A,A,A,A,A,A,A,-,A,B,B,A,A,A,B,B,B,B,A,A,-,A,A,A,B,A,A,B,A,A,B,A,A,A,-,B,-,A,-,A,A,A,B,A,-,A,A,B,A,A,A,B,B,A,A,B,B,A,A,-,-,A,B,A,B
S29_1618458,,-,A,-,A,A,A,A,A,B,A,B,B,A,B,A,A,A,B,A,A,A,A,-,B,B,A,A,A,A,A,A,B,A,A,A,A,B,A,A,A,B,A,A,A,B,B,B,A,A,B,B,A,A,A,A,A,A,A,A,B,A,B,B,B,B,B,A,B,A,B,A,B,A,-,A,A,A,A,B,A,B,A,A,B,A,A,B,A,B,B,A,A,A,B,A,A,A,B,A,A,A,A,A,A,A,A,A,A,A,A,A,A,A,B,B,A,A,A,B,B,B,B,A,A,-,A,A,A,B,A,A,B,A,A,B,A,A,A,A,B,-,A,-,A,A,A,B,A,-,A,A,B,A,A,A,B,B,A,A,B,B,A,A,-,-,A,B,A,B
S29_1629484,,-,A,-,A,A,A,A,A,B,A,B,B,A,B,A,A,A,B,A,A,A,A,-,B,B,A,A,A,A,A,A,B,A,A,A,A,A,A,A,A,B,A,A,A,B,B,B,A,A,B,B,A,A,A,A,A,A,A,A,B,A,B,B,B,B,B,A,B,A,B,A,B,A,B,A,A,A,A,B,-,B,A,A,B,A,A,B,A,B,B,A,A,A,B,A,A,A,B,A,A,A,A,A,A,A,A,A,A,A,A,A,-,A,B,B,A,A,A,B,B,B,B,A,A,-,A,A,A,B,A,A,B,A,A,B,-,A,B,-,B,-,A,A,A,A,A,B,A,-,A,A,B,A,A,A,B,B,A,A,B,B,A,A,-,-,A,B,A,B
S29_1635461,,-,A,-,A,A,A,-,A,B,A,B,B,A,B,A,A,A,B,A,A,-,A,-,B,B,A,A,A,-,A,A,B,A,A,A,A,A,A,A,A,B,A,A,A,B,-,B,A,A,B,B,A,A,A,A,A,A,A,A,B,-,B,-,B,B,-,A,B,A,B,A,B,A,-,A,A,A,A,B,-,B,A,A,B,A,-,B,A,B,B,-,A,A,B,A,-,A,B,A,A,A,A,A,A,A,A,A,A,-,A,A,-,A,B,B,A,A,A,B,B,B,B,A,A,-,A,-,A,-,A,B,B,A,A,B,A,A,B,-,B,-,A,-,A,A,A,B,A,-,A,A,B,A,A,A,B,B,A,A,B,B,A,A,A,-,A,B,A,A
S29_1645106,,-,A,-,A,A,A,A,A,B,A,B,B,A,B,A,A,A,B,A,A,A,A,-,B,B,A,A,A,A,A,A,B,A,A,A,A,A,A,A,A,B,A,A,A,B,B,B,A,A,B,B,A,A,A,A,A,A,A,A,B,A,B,-,B,B,B,A,B,A,B,A,B,A,-,A,A,A,A,B,-,B,A,A,B,A,A,B,A,B,B,A,A,A,B,A,A,A,B,A,A,A,A,A,A,A,A,A,A,A,A,A,-,A,B,B,A,A,A,B,B,B,B,A,A,-,A,A,A,B,A,B,B,A,A,B,A,A,B,-,B,A,A,-,A,A,A,B,A,-,A,A,B,A,A,A,B,B,A,A,B,B,A,A,-,-,A,B,A,A
S29_1678716,,-,A,-,A,A,A,A,A,B,A,B,A,A,B,A,A,A,B,A,A,A,A,-,B,B,A,A,A,A,A,A,B,A,A,A,A,A,A,A,A,B,A,A,A,B,B,B,A,A,B,B,A,A,A,A,A,A,A,A,B,A,B,B,B,B,B,A,B,A,B,A,B,A,-,A,A,A,A,B,-,B,A,A,B,A,A,B,A,B,B,A,A,A,B,A,A,A,B,A,A,A,A,A,B,A,A,A,A,A,A,A,-,A,B,B,A,A,A,B,B,B,B,A,B,-,A,A,A,B,A,B,B,A,A,B,A,A,B,A,B,A,A,-,A,A,A,B,A,-,A,A,B,A,A,A,B,B,A,A,B,A,A,A,-,-,A,B,A,A
S29_1686731,,-,A,-,A,A,A,A,A,B,A,B,A,A,B,A,A,A,B,A,A,A,A,-,B,B,A,A,A,A,A,A,B,A,A,A,A,A,A,A,A,B,A,A,A,B,B,B,A,A,B,B,A,A,A,A,A,A,A,A,B,A,B,B,B,B,B,A,B,A,B,A,B,A,B,A,A,A,A,B,-,B,A,A,B,A,A,B,A,B,B,A,A,A,B,A,A,A,B,A,A,A,A,A,B,A,A,A,A,A,A,A,A,A,B,B,A,A,A,B,B,B,B,A,B,-,A,A,A,B,A,B,B,A,A,B,A,A,B,A,B,-,A,-,A,A,A,B,A,A,A,A,B,A,A,A,B,B,A,A,B,A,A,A,-,-,A,B,A,A
S30_25676,,-,A,B,B,A,A,A,A,A,B,B,A,A,A,A,B,A,A,B,B,B,A,-,A,A,A,A,B,B,A,A,A,B,B,B,B,B,A,A,B,B,A,A,A,A,B,A,A,A,B,A,B,A,B,A,B,A,B,B,B,B,A,B,A,A,B,A,A,A,A,A,A,B,A,A,B,A,A,A,A,A,A,B,A,B,B,B,B,A,A,A,A,A,A,A,B,A,A,A,B,A,A,A,A,B,A,B,A,A,B,A,-,A,A,A,A,A,B,B,B,A,B,A,B,B,A,A,A,B,A,A,A,B,A,B,A,A,A,A,A,-,B,-,B,A,A,B,B,-,A,A,A,A,A,B,A,A,B,-,A,B,B,A,A,B,B,A,A,A
S30_37891,,-,A,-,B,A,A,A,A,A,B,B,A,A,A,A,B,A,A,B,B,B,A,-,A,A,A,A,B,B,A,A,A,B,B,B,B,B,A,A,B,B,A,A,A,A,B,A,A,A,B,A,B,A,B,A,B,A,B,B,B,B,A,-,A,A,B,A,A,A,A,A,A,B,-,A,B,A,A,A,-,A,A,B,A,B,B,B,B,A,A,A,A,A,A,A,B,A,A,A,B,A,A,A,A,B,A,B,A,A,B,A,A,A,A,A,A,A,B,B,B,A,B,A,B,B,A,A,A,B,A,A,A,B,A,B,A,A,A,-,A,A,B,-,B,A,A,B,B,-,A,A,A,A,A,B,A,A,B,-,A,B,B,A,A,-,B,A,A,A
S30_48065,,-,A,-,B,A,A,A,A,A,B,B,A,A,A,A,B,A,A,B,B,B,A,A,A,A,A,A,B,B,A,A,A,B,B,B,B,B,A,A,B,B,A,A,A,A,B,A,A,A,B,A,B,A,B,A,B,A,B,B,B,B,A,-,A,A,B,A,A,A,A,A,A,B,A,A,B,A,A,A,A,A,A,B,A,B,B,B,B,A,A,A,A,A,A,A,B,A,A,A,B,A,A,A,A,B,A,B,A,A,B,A,-,A,A,A,A,A,B,-,B,A,B,A,B,B,A,A,A,B,A,A,A,B,A,B,A,A,A,-,A,-,B,-,B,A,A,B,B,B,A,A,A,A,A,B,A,B,B,-,A,B,B,A,A,-,B,A,A,A
S30_60354,,-,A,-,B,A,A,A,A,A,B,B,-,A,A,A,B,A,A,B,B,B,A,-,A,A,A,A,A,B,A,A,A,B,B,B,B,-,A,A,B,B,A,A,A,A,B,A,A,A,B,A,B,A,B,A,B,A,B,B,B,B,A,B,A,A,B,A,A,A,A,A,A,B,A,A,B,A,A,A,-,A,A,B,A,B,B,B,B,A,A,A,A,A,A,A,B,A,A,A,B,A,A,A,A,B,A,B,A,A,B,A,A,A,A,A,A,A,B,-,B,A,B,A,B,B,A,A,A,B,A,A,A,B,A,B,-,A,A,A,A,-,B,-,B,A,A,B,B,-,A,A,A,A,A,B,A,B,B,A,A,B,B,A,A,-,B,A,A,A
S30_69288,,-,A,-,B,A,A,A,A,A,B,B,A,A,A,A,B,A,A,B,B,B,A,A,A,A,A,A,B,B,A,A,A,B,B,B,B,B,A,A,B,B,A,A,A,A,B,A,A,A,B,A,B,A,B,A,B,A,B,B,B,B,A,B,A,A,B,A,A,A,A,A,A,B,A,A,B,A,A,A,A,A,A,B,A,B,B,B,B,A,A,A,A,A,A,A,B,A,A,A,B,A,A,A,A,B,A,B,A,A,B,A,-,A,A,A,A,A,B,-,B,A,B,A,B,B,A,A,A,B,A,A,A,B,A,B,A,A,A,-,A,-,B,-,B,A,A,B,B,-,A,A,A,A,A,B,A,B,B,-,A,B,B,A,A,-,B,A,A,A
S30_70860,,-,A,-,B,-,A,A,A,A,B,-,-,A,A,A,B,A,A,B,B,B,A,-,A,A,A,A,B,B,A,A,-,B,B,B,B,-,-,A,B,B,A,A,A,-,B,A,A,A,B,A,B,A,B,A,B,A,B,B,B,B,A,B,A,A,B,A,A,A,A,A,A,B,-,A,B,A,A,A,-,A,A,B,A,-,B,-,B,A,A,A,-,A,A,A,B,A,A,A,B,A,A,A,A,B,A,B,A,A,B,A,-,A,A,A,A,A,B,A,B,A,B,A,B,B,A,A,A,B,A,A,A,B,A,B,A,A,A,-,A,-,B,-,B,A,A,B,B,-,A,A,A,A,A,B,A,B,-,-,A,B,B,A,A,-,B,A,A,A
S30_73133,,-,A,B,B,-,A,A,A,A,B,B,A,A,A,A,B,A,A,B,B,B,A,-,A,A,A,A,B,B,A,A,A,B,B,B,B,B,-,A,B,B,A,A,A,A,B,A,A,A,B,A,B,A,B,A,B,A,B,B,B,B,A,B,A,A,B,A,A,A,A,A,A,B,-,A,B,A,A,A,-,A,A,B,A,B,B,B,B,A,A,A,A,A,A,A,B,A,A,A,B,A,A,A,A,B,A,B,A,A,B,A,-,A,A,A,A,A,B,-,B,A,B,A,B,B,A,A,A,B,A,A,A,B,A,B,-,A,A,-,A,-,B,B,B,A,A,B,B,-,A,A,A,A,A,B,A,B,B,-,A,B,B,A,A,-,B,A,A,A
S30_77096,,-,A,-,B,-,A,-,A,A,B,B,-,A,A,-,B,A,-,B,B,B,A,-,A,A,A,A,B,B,A,A,-,B,B,B,B,B,A,A,B,B,A,A,A,-,B,A,A,A,B,-,B,A,B,A,B,A,B,B,B,B,A,-,A,A,B,A,A,A,A,A,A,B,-,A,B,A,A,A,-,A,A,B,-,B,B,-,B,A,A,A,A,A,A,A,B,A,A,A,B,A,A,A,A,B,A,B,A,-,B,A,-,A,A,-,-,A,B,-,B,A,B,A,B,B,A,-,-,B,A,A,A,B,A,B,A,A,A,A,-,-,B,-,B,A,A,B,B,-,A,A,A,A,A,B,A,B,-,-,A,B,B,A,A,-,B,-,A,A
S30_101745,,-,A,-,B,A,A,A,A,A,B,B,A,A,A,A,B,A,A,B,B,B,A,-,A,A,A,A,B,B,A,A,A,B,B,B,B,-,A,A,B,B,A,A,A,A,B,A,A,A,B,A,B,A,B,A,B,B,B,B,B,B,A,-,A,A,A,A,A,A,A,A,A,B,-,A,B,A,A,A,-,A,A,B,A,B,B,B,B,A,A,A,A,A,A,A,B,A,A,A,B,A,A,A,A,B,A,B,A,A,B,A,-,A,A,A,A,A,B,-,B,A,B,A,B,B,A,A,A,B,A,A,A,B,A,B,A,A,A,-,A,-,B,-,B,A,A,B,B,-,A,A,A,A,A,A,A,B,B,-,B,B,B,-,A,-,B,A,A,A
S30_158773,,-,A,-,B,A,A,A,A,A,-,B,A,A,A,A,B,A,A,-,B,B,A,-,A,A,A,A,-,-,A,A,A,-,B,B,B,B,A,A,B,B,A,A,A,A,B,A,A,A,B,A,B,A,-,A,B,B,B,B,B,B,A,-,A,A,A,A,A,A,A,A,A,-,A,A,B,A,A,A,-,A,A,B,B,B,B,B,B,A,A,A,A,A,A,A,-,A,A,A,B,A,A,A,A,B,A,B,A,A,B,A,-,A,A,A,A,A,B,-,-,A,B,A,B,B,A,A,A,B,A,A,A,B,A,B,A,A,A,A,A,-,B,-,B,A,A,B,B,-,A,A,A,A,A,A,-,B,B,-,B,B,B,-,A,-,B,A,A,A
S30_207895,,A,A,-,B,A,A,A,A,A,B,B,A,A,A,A,B,A,A,B,B,B,A,A,A,A,A,A,B,B,A,A,A,B,B,B,B,-,A,A,B,B,A,A,A,A,B,A,A,A,B,A,B,A,B,A,B,B,B,B,B,B,A,B,A,A,A,A,A,B,A,A,A,B,-,A,B,A,A,A,A,A,A,B,B,B,B,B,B,A,A,A,A,A,A,A,B,A,A,A,B,A,A,A,A,B,A,B,A,A,B,A,-,A,A,A,A,A,B,-,B,A,B,A,B,B,A,A,A,B,A,A,A,B,A,B,A,A,A,A,A,-,B,-,B,A,A,B,B,B,A,A,A,A,A,A,A,B,B,A,B,B,B,-,A,-,B,A,A,A
S30_366142,,-,A,-,B,-,A,-,A,A,B,B,-,A,A,-,B,A,A,B,B,B,A,-,A,A,A,A,-,B,-,A,-,B,B,B,A,A,-,A,B,B,A,A,A,A,B,A,A,A,B,A,B,A,B,A,B,B,B,B,B,B,A,-,A,A,-,-,A,B,A,A,A,B,A,A,B,A,A,A,-,A,A,B,B,B,B,B,B,A,A,A,A,-,A,A,B,A,A,A,B,A,A,A,A,B,A,B,A,A,B,A,-,A,A,A,A,A,B,A,B,A,B,A,B,B,A,A,A,-,A,A,A,B,A,B,-,A,-,-,A,A,B,-,B,A,-,B,B,-,A,A,A,A,A,A,-,B,-,A,B,B,B,-,A,-,B,A,A,A
S30_389951,,-,A,-,B,A,A,A,A,A,B,B,A,A,A,A,B,A,A,B,B,B,A,B,A,A,A,A,-,B,A,-,A,B,B,B,A,-,A,A,B,B,A,A,A,A,B,A,A,A,B,A,B,A,B,A,B,B,B,B,B,B,A,B,A,A,A,A,A,B,A,A,A,B,-,A,B,A,A,A,A,A,A,B,B,B,B,B,B,A,A,A,A,A,A,A,B,A,A,A,B,A,A,A,A,B,A,B,A,A,B,A,-,A,A,A,A,A,B,A,B,A,B,A,B,B,A,A,A,B,A,A,A,B,A,B,A,A,A,-,A,-,B,-,B,A,A,B,B,-,A,A,A,A,A,A,A,B,B,-,B,B,B,-,A,-,B,A,A,A
S30_391252,,-,A,-,B,A,A,A,A,A,B,B,A,A,A,-,B,A,A,B,B,B,A,B,A,A,A,A,B,B,A,A,A,B,B,B,A,-,A,A,B,B,A,A,A,A,B,A,A,A,B,A,B,A,B,A,B,B,B,B,B,B,A,B,A,A,A,A,A,B,A,A,A,B,A,A,B,A,A,A,-,A,A,B,B,B,B,B,B,A,A,A,A,A,A,A,B,A,A,A,B,A,A,A,A,B,A,B,A,A,B,A,-,A,A,A,A,A,B,-,B,A,B,A,B,B,A,A,A,B,A,A,A,B,A,B,A,A,A,A,A,-,B,-,B,A,A,B,B,-,A,A,A,A,A,A,A,B,B,-,B,B,B,-,A,-,B,A,A,A
S30_405377,,A,A,-,B,A,A,A,A,A,B,B,A,A,A,A,B,A,A,B,B,B,A,-,A,B,A,A,B,B,A,A,A,B,B,B,A,-,A,A,B,B,A,A,A,A,B,A,A,A,B,A,B,A,B,A,B,B,B,B,B,B,A,-,A,A,A,A,A,B,A,A,A,B,A,A,B,A,A,A,-,A,A,B,B,B,B,B,B,A,A,A,A,A,A,A,B,A,A,A,B,A,A,A,A,B,A,B,A,A,B,A,-,A,A,A,A,A,B,A,B,A,B,A,B,B,A,A,A,B,A,A,A,B,A,B,A,A,A,A,A,-,B,-,B,A,A,B,B,-,A,A,A,A,A,A,A,B,B,A,B,B,B,-,A,-,B,A,A,A
S30_409242,,A,A,-,B,A,A,A,A,A,B,B,A,A,A,A,B,A,A,B,B,B,A,-,A,B,A,A,B,B,A,A,A,-,B,B,A,A,A,A,B,B,A,A,A,-,B,A,A,A,B,A,B,A,B,A,B,B,B,B,B,B,A,-,A,A,A,A,A,B,A,A,A,B,-,A,B,A,A,A,-,A,A,B,B,B,B,B,B,A,A,A,A,A,A,A,B,A,A,A,-,A,A,A,A,B,A,B,A,-,B,A,-,A,A,A,-,A,B,A,B,A,B,A,B,B,A,A,A,-,A,A,A,B,A,B,-,A,A,-,A,-,B,-,B,A,A,B,B,-,A,A,-,A,A,A,A,B,B,A,B,B,B,-,A,B,B,A,A,A
S30_416429,,-,A,-,B,-,A,A,A,A,-,B,A,A,A,-,B,A,A,-,B,B,A,-,A,B,A,A,-,B,A,A,A,B,B,B,A,-,A,A,B,B,A,A,A,-,B,A,A,A,B,A,B,A,B,A,B,B,B,B,B,B,A,B,A,A,-,A,A,B,A,A,A,B,-,A,B,A,A,A,-,A,A,B,B,B,B,B,B,A,A,A,A,A,A,A,B,A,A,A,B,A,A,A,A,B,A,B,A,A,B,A,-,A,A,A,A,A,B,A,B,A,B,A,B,B,A,A,A,B,A,A,A,B,A,B,-,A,-,-,A,-,B,-,B,A,A,B,B,-,A,A,-,A,A,A,-,B,-,-,B,B,B,A,A,-,B,A,A,-
S30_476823,,-,A,-,B,A,A,A,A,A,B,B,A,A,A,A,B,A,A,B,B,B,A,A,A,B,A,A,B,B,A,A,A,B,B,B,A,-,A,A,B,B,A,A,A,A,B,A,A,A,B,A,B,A,B,A,B,B,A,B,B,B,A,B,A,A,A,A,A,B,A,A,A,B,A,A,B,A,A,A,A,A,A,B,B,B,B,B,B,A,A,A,A,A,A,A,B,A,A,A,B,A,A,A,A,B,A,B,A,A,B,A,-,A,A,A,A,A,B,A,B,A,B,A,B,B,A,A,A,B,A,A,A,B,A,B,A,A,A,-,A,-,B,B,B,A,A,B,B,-,A,A,A,A,A,A,A,B,B,A,B,B,B,-,A,-,B,A,A,A
S30_542921,,-,A,-,B,A,A,A,A,A,B,B,A,A,A,A,B,A,A,B,B,B,A,B,A,B,A,A,B,B,A,A,A,B,B,B,A,-,A,A,B,B,A,A,A,A,B,A,A,A,B,A,B,A,B,A,B,B,A,B,B,B,A,B,A,A,A,B,A,B,A,A,A,B,A,A,B,A,A,A,-,A,A,A,B,B,B,B,B,A,A,A,A,A,A,A,B,A,A,A,B,A,A,A,A,B,A,B,A,A,B,A,-,A,A,A,A,A,B,B,B,A,B,A,B,B,A,A,A,B,A,A,A,B,A,B,A,A,A,A,A,-,B,-,B,A,A,B,B,-,A,A,A,A,A,A,A,B,B,-,B,B,A,-,A,-,B,A,A,A
S30_548508,,-,A,-,B,A,A,A,A,A,B,B,A,A,A,A,-,A,A,B,B,B,A,-,A,B,A,A,B,B,-,A,A,B,B,B,A,-,A,A,B,B,A,A,A,-,B,A,A,A,B,A,B,A,B,A,B,B,A,B,B,-,A,B,A,A,A,B,A,B,A,A,A,B,-,A,B,A,A,A,A,A,A,A,B,B,B,B,B,A,A,A,A,A,A,A,B,A,A,A,B,A,B,A,A,B,A,B,A,A,B,A,-,A,A,A,A,A,B,-,B,A,B,A,B,B,A,A,A,B,A,A,A,B,A,B,-,A,A,A,A,-,B,-,B,A,A,B,B,-,A,A,A,A,A,A,A,B,B,-,B,B,A,B,A,-,B,A,A,A
S30_570921,,-,A,-,B,A,B,A,A,A,B,B,A,A,A,A,B,A,A,B,B,B,A,B,A,B,A,A,B,B,A,A,A,B,B,B,A,-,A,A,B,B,A,A,A,A,B,A,A,A,B,A,B,A,B,A,B,B,A,B,B,B,A,B,A,A,A,B,A,B,A,A,A,B,A,A,B,A,A,A,-,A,A,A,B,B,B,B,B,A,A,A,A,A,A,A,B,A,A,A,B,A,B,A,A,B,A,B,A,A,B,A,-,A,A,A,A,A,B,-,A,A,B,A,B,B,A,A,A,B,A,A,A,B,A,B,A,A,A,A,A,-,B,-,B,A,A,B,B,-,A,A,A,A,A,A,A,B,B,-,B,B,A,-,A,-,B,A,A,A
S30_581010,,-,A,-,B,-,B,-,A,A,B,B,A,A,A,-,B,A,A,B,B,B,A,-,A,B,-,A,B,B,-,A,-,B,B,B,A,-,A,A,B,B,A,-,A,A,B,A,A,A,-,A,B,A,B,A,B,B,A,B,B,B,A,-,A,A,A,-,A,B,A,A,A,B,-,A,B,A,A,A,-,A,A,A,B,B,B,B,-,A,A,A,A,A,A,A,B,A,A,A,-,A,B,A,A,B,A,B,A,A,B,A,-,A,A,A,A,A,B,-,A,A,B,A,B,B,-,A,A,B,A,A,A,B,A,B,A,A,A,-,A,A,B,-,B,A,A,B,B,-,A,A,-,A,-,A,A,B,-,-,B,B,A,-,A,-,-,A,A,A
S30_598709,,-,A,-,B,A,B,A,A,A,B,B,A,A,A,A,B,A,A,B,B,B,A,-,A,B,A,A,B,B,A,A,A,B,B,B,A,-,A,A,B,B,A,A,A,A,B,A,A,A,B,A,B,A,B,A,B,B,A,B,B,B,A,B,A,A,A,B,A,B,A,A,A,B,A,A,B,A,A,A,-,A,A,A,B,B,B,B,B,A,A,A,A,A,A,A,B,A,A,A,B,A,B,A,A,B,A,B,A,A,B,A,-,A,A,A,A,A,B,B,A,A,B,A,B,B,A,A,A,B,A,A,A,B,A,B,A,A,A,-,A,-,B,-,B,A,A,B,B,-,A,A,A,A,A,A,A,B,B,-,B,B,A,-,A,-,B,A,A,A
S30_633954,,-,A,-,B,A,B,A,A,A,B,B,A,A,A,A,B,A,A,B,B,B,A,-,A,B,A,A,B,B,A,A,A,B,B,B,A,-,A,A,B,B,A,A,A,A,B,A,A,A,B,A,B,A,B,A,B,B,A,B,B,B,A,B,A,A,A,B,A,B,A,A,A,B,-,A,B,A,A,A,-,A,A,A,B,B,B,B,B,A,A,A,A,A,A,A,B,A,A,A,B,A,B,A,A,B,A,B,A,A,B,A,-,A,A,A,A,A,B,-,A,A,B,A,B,B,A,A,A,B,A,A,A,B,A,B,A,A,A,A,A,-,B,-,B,A,A,B,B,-,A,A,A,A,A,A,A,B,B,-,B,B,A,-,A,-,B,A,A,A
S30_646620,,-,A,-,B,A,B,A,A,A,B,B,A,A,A,A,B,A,A,B,B,B,A,-,A,B,A,A,B,B,A,A,A,B,B,B,A,-,A,A,B,B,A,A,A,A,B,A,A,A,B,A,B,A,B,A,B,B,A,B,B,B,A,B,A,A,A,B,A,B,A,A,A,B,A,A,B,A,A,A,-,A,A,A,B,B,B,B,B,A,A,A,A,A,A,A,B,A,A,A,B,A,B,A,A,B,A,B,A,A,B,A,-,A,A,A,A,A,B,B,A,A,B,A,B,B,A,A,A,B,A,A,A,B,A,B,A,A,A,A,A,-,B,-,B,A,A,B,B,-,A,A,A,A,A,A,A,B,B,A,B,B,A,-,A,-,B,A,A,A
S30_695915,,-,A,-,B,-,B,-,A,A,B,B,-,A,A,-,B,A,A,B,B,B,A,-,A,B,A,A,B,B,A,A,-,B,B,B,A,B,A,A,B,B,A,A,A,A,B,A,A,A,B,-,B,A,B,A,B,B,-,B,B,B,A,-,A,A,-,B,-,B,A,A,A,B,-,A,B,A,A,A,-,A,A,A,B,B,B,B,B,A,A,A,A,-,-,A,B,-,A,A,B,A,B,-,A,B,-,B,-,A,B,-,-,A,A,A,A,A,B,B,A,A,B,A,B,B,A,A,-,B,A,A,A,B,A,B,-,A,A,-,A,-,B,-,B,A,A,B,B,-,A,A,-,A,A,A,A,B,B,B,B,B,A,-,A,-,B,A,A,A
S30_737484,,-,A,B,B,A,B,A,A,A,B,B,A,A,A,A,B,A,A,B,B,B,A,A,A,B,A,A,B,B,A,A,A,B,A,B,A,-,A,A,B,B,A,A,A,A,B,A,A,A,B,A,B,A,B,A,B,B,A,B,B,B,A,B,A,A,A,B,B,B,A,A,A,B,A,A,B,A,A,A,-,A,A,A,B,B,B,B,B,A,A,A,A,A,A,A,A,A,A,A,B,A,B,A,A,B,A,B,A,A,B,A,-,A,A,A,A,A,B,-,A,A,B,A,B,B,A,A,A,B,A,A,A,B,A,B,A,A,A,A,A,-,B,-,B,A,A,B,B,B,A,B,A,A,A,A,A,B,B,-,B,B,A,-,A,-,B,A,A,B
S30_745251,,-,A,-,B,A,B,A,A,A,B,B,A,A,A,A,B,A,A,B,B,B,A,-,A,B,A,A,B,B,A,A,A,B,A,B,A,-,A,A,B,B,A,A,A,A,B,A,A,A,B,A,B,A,B,A,B,B,A,B,B,B,A,B,A,A,A,B,B,B,A,A,A,B,-,A,B,A,A,A,-,A,A,A,B,B,B,B,B,A,A,A,A,A,A,A,A,A,A,A,B,A,B,A,A,B,A,B,A,A,B,A,A,A,A,A,A,A,B,-,A,A,B,A,B,B,A,A,A,B,A,A,A,B,A,B,A,A,A,A,A,-,B,-,B,A,A,B,B,-,A,B,A,A,A,A,A,B,B,-,B,B,A,-,A,B,B,A,A,B
S30_747769,,-,A,-,B,B,B,A,A,A,B,B,A,A,A,A,B,A,A,B,B,B,A,-,A,B,A,A,B,B,A,A,A,B,A,B,A,-,A,A,B,B,A,A,A,A,B,A,A,A,B,A,B,A,B,A,B,B,A,B,B,B,A,-,A,A,A,B,B,B,A,A,A,B,-,A,B,A,A,A,A,A,A,A,B,B,B,B,B,A,A,A,A,A,A,A,A,A,A,A,B,A,B,A,A,B,A,B,A,A,B,A,-,A,A,A,A,A,A,-,A,A,B,A,B,B,A,A,A,B,A,A,A,B,A,B,A,A,A,A,A,-,B,-,B,A,A,B,B,-,A,B,A,A,A,A,A,B,B,-,B,B,A,-,A,-,B,A,A,B
S30_766233,,-,A,-,B,B,B,A,A,A,B,B,A,A,A,A,B,A,A,B,B,B,A,B,A,B,A,A,B,B,B,A,A,B,A,B,A,-,A,A,B,B,A,A,A,A,B,A,A,A,B,A,B,A,B,A,B,A,A,B,B,B,A,B,A,A,A,B,B,B,A,A,A,B,A,A,B,A,A,A,A,A,A,A,B,B,B,B,B,A,A,A,A,A,A,A,A,A,A,B,B,A,B,A,A,B,A,B,A,A,B,A,-,A,A,A,A,A,A,-,A,A,B,A,B,B,A,A,A,B,A,A,A,B,A,B,A,A,A,A,-,-,B,-,B,A,A,B,B,-,A,B,A,A,A,A,A,B,B,-,B,B,A,-,A,B,B,A,A,B
S30_800412,,-,A,-,B,B,B,A,A,-,-,B,A,A,A,-,-,A,A,-,B,-,A,-,A,B,A,A,-,B,B,-,-,B,A,B,A,B,-,A,-,B,A,A,A,-,B,A,A,B,B,A,B,A,B,A,B,A,A,B,B,B,A,B,-,A,A,B,B,B,-,A,A,B,-,A,B,A,A,A,-,A,A,A,B,B,B,B,B,A,A,A,-,A,A,A,A,A,A,B,B,A,B,A,-,B,A,B,A,A,B,A,-,A,A,A,A,B,A,B,-,A,-,-,B,B,A,A,A,-,A,A,A,B,A,B,-,A,A,A,A,-,B,-,B,A,A,B,B,-,-,B,A,A,A,-,A,B,-,B,B,B,A,B,A,-,B,A,A,B
S30_859847,,-,A,-,B,B,B,A,B,A,A,B,A,A,A,A,B,A,A,B,B,B,A,-,A,B,A,A,B,B,B,A,-,B,A,B,A,-,A,A,B,B,A,A,A,A,B,A,A,B,B,A,B,A,B,A,B,A,A,B,B,B,A,B,A,A,A,B,B,B,A,A,A,B,-,A,B,A,A,A,-,A,A,A,B,B,B,B,B,A,A,A,A,A,A,A,A,A,A,B,B,A,B,A,A,B,A,B,A,A,B,A,-,A,A,A,A,B,A,-,A,A,B,A,B,B,A,A,A,B,A,A,A,B,A,-,A,A,A,A,-,-,B,-,B,A,A,B,B,-,A,B,A,A,A,B,A,B,-,-,B,B,A,B,A,-,B,A,A,B
S30_924701,,-,A,-,-,-,B,-,B,-,A,B,-,A,A,A,B,A,A,B,B,-,A,-,A,B,A,A,B,B,B,A,-,B,A,B,A,-,-,A,B,B,A,A,A,A,B,A,A,B,B,-,B,A,B,A,B,A,A,B,B,B,A,-,A,A,A,B,B,B,A,A,B,B,A,A,B,A,A,A,-,A,A,A,B,B,B,B,-,A,A,A,A,A,A,A,A,A,A,B,-,A,B,A,A,B,A,B,A,A,B,A,-,A,A,A,A,B,A,-,-,A,B,A,B,B,A,A,A,-,A,-,A,B,A,B,A,A,A,-,-,-,B,-,B,A,A,B,B,-,A,B,A,A,A,B,-,B,-,A,B,B,A,B,A,-,-,A,A,B
S30_926680,,-,A,-,B,-,B,-,B,A,A,B,-,A,A,-,B,A,A,B,B,B,A,B,A,B,A,A,B,B,B,A,A,-,A,-,A,-,-,A,B,B,A,A,A,-,B,A,A,B,B,-,B,A,B,A,B,A,A,B,B,B,A,-,A,A,-,B,-,B,A,A,B,B,-,A,-,A,A,A,-,A,A,A,B,B,B,-,B,A,A,-,A,A,A,A,A,-,A,B,-,A,B,A,A,B,A,B,A,-,B,A,-,A,A,A,-,B,A,-,A,A,B,A,B,B,-,A,A,B,A,A,A,B,A,B,A,A,A,-,-,A,B,-,-,A,A,B,B,-,A,B,A,A,A,-,A,B,-,-,B,B,A,-,A,-,B,A,A,B
S30_1009673,,-,A,-,B,B,B,A,B,A,A,B,A,A,A,A,B,A,A,B,B,B,A,-,A,B,A,A,B,B,B,A,A,B,A,B,A,A,B,A,B,B,A,A,A,-,B,A,B,B,-,A,B,A,B,A,B,A,A,B,B,B,A,B,B,A,A,B,B,B,A,A,B,B,-,A,B,A,A,A,-,A,B,A,B,B,B,B,B,A,A,A,A,A,A,A,A,A,A,B,B,A,B,A,A,B,A,B,A,A,B,B,-,A,A,A,A,B,A,-,A,A,B,A,B,B,A,A,A,-,A,A,A,B,A,B,-,A,A,-,-,-,B,-,B,A,A,B,B,-,A,B,A,A,A,B,A,B,B,A,B,B,A,B,A,-,B,A,A,B
S30_1176590,,-,A,-,B,B,B,A,B,A,A,B,A,A,A,B,B,A,B,B,B,B,A,A,B,B,A,A,B,B,B,A,A,B,A,B,B,A,B,A,B,B,A,B,A,A,B,A,B,B,B,A,B,A,A,A,B,A,A,B,B,B,A,B,B,A,A,B,B,B,A,A,B,B,-,A,B,A,A,A,A,A,B,A,B,B,B,B,B,A,A,A,A,A,A,A,A,A,A,B,B,A,B,A,A,B,A,B,A,A,B,B,-,A,A,A,A,B,A,A,A,A,B,A,B,A,A,A,A,B,A,A,A,B,A,B,A,A,-,A,-,A,B,-,B,A,A,B,B,-,A,B,A,A,A,B,A,B,B,A,B,B,A,B,A,-,A,A,A,B
S30_1189112,,-,A,-,B,B,B,A,B,A,A,B,A,A,A,B,B,A,B,B,B,B,A,-,B,B,A,A,B,B,B,A,A,B,A,B,B,A,B,A,B,B,A,B,A,A,B,A,B,B,B,A,B,A,A,A,B,A,A,B,B,B,A,B,B,A,A,B,B,B,A,A,B,B,-,A,B,A,A,A,-,A,B,A,B,B,B,B,B,A,A,A,A,A,A,A,A,A,A,B,B,A,B,A,A,B,A,B,A,A,B,B,A,A,A,A,A,B,A,A,A,A,B,A,B,A,A,A,A,B,A,A,A,B,A,B,A,A,-,A,-,-,B,-,B,A,A,B,B,-,A,B,A,A,A,B,A,B,B,A,B,B,A,B,A,-,A,A,A,B
S30_1197802,,-,A,-,B,B,B,A,B,-,A,B,A,A,A,B,B,A,B,B,B,B,A,A,B,B,A,A,-,B,B,A,A,B,A,B,B,A,B,A,B,B,A,B,A,A,B,A,B,B,B,A,B,A,A,A,B,A,A,B,B,B,A,-,B,A,A,B,B,B,A,A,B,B,-,A,B,A,A,A,-,A,B,A,B,B,B,B,B,A,A,A,A,A,A,A,A,A,A,B,B,A,B,A,A,B,A,B,A,A,B,B,-,A,A,A,A,B,A,A,-,A,B,A,B,A,A,A,A,B,A,A,A,B,A,B,A,A,-,-,A,A,B,-,B,A,A,B,B,-,A,B,-,A,A,B,A,B,B,A,B,B,A,B,A,-,A,A,A,B
S30_1200382,,-,A,-,B,B,B,A,B,A,A,B,A,A,A,B,B,A,B,B,B,B,A,-,B,B,A,A,B,B,B,A,A,B,A,B,B,A,B,A,B,B,A,B,A,A,B,A,B,B,B,A,B,A,A,A,B,A,A,B,B,B,A,B,B,A,A,B,B,B,A,A,B,B,-,A,B,A,A,A,-,A,B,A,B,B,B,B,B,A,A,A,A,A,A,A,A,A,A,B,B,A,B,A,A,B,A,B,A,A,B,B,-,A,A,A,A,B,A,A,A,A,B,A,B,A,A,A,A,B,A,A,A,B,A,B,A,A,-,A,-,-,B,-,B,A,A,B,B,-,A,B,A,A,A,B,A,B,B,A,B,B,A,B,A,-,A,A,A,B
S30_1269363,,-,A,-,B,B,B,A,B,A,A,B,A,A,A,B,B,A,B,B,B,B,A,-,B,B,A,A,B,B,B,A,A,B,A,B,B,A,B,A,B,B,A,B,A,A,B,A,B,B,B,A,B,A,A,A,B,A,A,B,B,B,A,B,B,A,A,B,B,B,A,A,B,B,A,A,B,A,A,B,A,A,B,A,B,B,B,B,B,A,A,A,A,A,A,B,A,A,A,B,B,A,B,A,A,A,A,B,A,A,B,B,-,A,A,A,A,B,A,A,A,A,B,A,B,A,A,A,A,B,A,A,A,B,A,B,A,A,-,-,-,A,B,-,B,A,A,B,B,-,A,B,A,A,A,B,A,B,B,A,B,B,A,B,A,A,A,A,A,B
S30_1347925,,-,A,-,B,B,B,-,B,A,-,-,A,A,A,B,-,A,B,B,B,B,A,-,B,B,A,A,-,B,B,A,A,B,A,B,-,-,B,-,B,B,A,B,A,-,B,-,B,B,B,A,B,-,A,A,B,A,-,B,B,B,A,-,B,A,A,B,B,B,A,A,B,B,-,A,B,A,A,B,-,A,B,A,B,B,B,A,B,A,A,A,-,A,A,B,A,A,-,B,B,A,B,A,A,A,A,B,A,A,B,B,-,A,A,A,-,-,A,A,-,A,B,A,B,A,A,A,A,B,B,A,A,B,A,B,A,A,B,-,-,-,B,-,B,A,A,B,B,-,A,B,-,A,A,B,A,B,-,A,B,B,A,B,A,-,A,-,A,B
S30_1443137,,-,A,-,B,B,B,A,B,A,A,B,A,A,A,B,B,A,B,B,B,B,A,A,B,B,A,A,-,B,B,A,B,B,A,B,B,A,B,A,B,B,A,B,A,A,B,A,B,B,B,A,B,A,A,B,B,A,A,B,B,B,A,B,B,A,A,B,B,B,A,A,B,B,A,A,B,A,A,B,-,A,B,A,B,B,B,A,B,A,A,A,A,A,A,B,A,A,A,B,B,A,B,A,A,A,A,B,B,A,B,B,-,A,A,A,A,B,A,A,A,A,B,A,B,A,A,A,A,B,B,A,A,B,A,B,A,A,-,A,-,-,B,-,B,A,A,B,B,-,A,B,-,A,A,B,A,B,B,A,B,B,A,B,A,A,A,A,A,B
S30_1518516,,-,A,-,B,B,B,A,B,A,A,B,A,A,A,B,B,A,B,B,B,B,A,A,B,B,A,A,B,B,A,A,B,B,A,B,B,A,B,A,B,B,A,B,A,A,B,A,B,B,B,A,B,A,B,B,B,A,A,A,B,B,A,B,B,A,A,B,B,B,A,A,B,B,A,A,B,A,A,B,-,A,B,A,B,B,B,A,B,B,A,A,A,A,A,B,A,A,A,B,B,A,B,A,A,A,A,B,B,A,B,B,-,A,A,A,B,B,A,A,A,A,B,A,B,A,A,A,A,B,B,A,A,B,A,B,A,A,-,A,-,-,B,-,A,A,A,B,B,-,A,B,A,A,A,B,A,B,B,A,B,B,A,B,A,-,A,A,A,B
S30_1580529,,-,A,-,B,B,B,A,B,A,A,B,A,A,A,B,B,A,B,B,B,B,A,A,B,B,A,A,B,B,A,A,B,B,A,B,B,A,B,A,B,B,A,B,A,A,B,A,B,B,B,A,B,A,B,B,B,A,A,A,B,B,A,-,B,A,A,B,B,B,A,A,B,B,A,A,B,A,A,B,-,A,B,A,B,B,B,A,B,B,A,A,A,A,B,B,A,A,A,B,B,A,B,A,A,A,A,B,B,A,B,B,-,A,A,A,B,B,A,A,A,A,B,A,B,A,A,A,A,B,B,A,A,B,A,-,A,A,-,A,-,-,B,-,A,A,A,B,B,-,A,B,A,A,A,B,A,B,B,A,B,B,A,B,A,-,A,A,A,B
S30_1639955,,-,A,-,B,B,B,A,B,A,A,B,A,A,A,B,B,A,B,B,B,B,A,A,B,B,A,B,B,B,A,A,B,B,A,B,B,A,B,A,A,B,A,B,A,A,B,A,B,A,B,A,B,A,B,B,B,A,A,A,B,B,A,-,B,A,A,B,B,B,A,A,B,B,-,A,B,A,A,B,-,A,B,A,B,B,B,A,B,B,A,A,A,A,B,B,A,A,A,B,B,A,B,A,A,A,A,B,B,A,B,B,-,A,A,A,B,B,B,A,A,A,B,A,B,A,A,A,A,B,B,A,A,B,A,-,A,A,-,A,-,A,B,-,A,A,A,B,B,B,A,B,A,A,A,B,A,B,B,A,B,B,A,B,A,-,A,A,A,B
S30_1708522,,-,A,-,B,B,B,A,B,A,A,B,A,A,A,B,B,A,B,B,B,A,A,-,B,B,A,B,B,B,A,A,B,B,A,B,A,A,-,A,A,B,A,B,A,A,A,A,B,A,B,A,B,A,B,B,B,A,A,A,B,-,A,-,B,A,-,A,B,B,A,A,B,B,-,A,B,A,A,B,-,A,B,A,B,B,B,A,B,B,A,A,A,A,B,A,A,A,A,B,B,A,B,A,A,A,A,B,B,A,B,B,-,A,A,A,B,B,B,A,-,A,B,A,B,A,A,A,A,B,B,A,A,B,A,B,-,A,-,-,-,-,B,-,A,A,A,B,B,-,A,B,-,A,A,B,A,B,-,A,B,B,A,A,A,-,A,A,A,B
S30_1813923,,-,A,-,B,B,B,A,B,A,A,B,A,A,A,B,B,A,B,B,B,A,A,-,B,B,A,B,B,B,A,-,B,B,A,B,B,A,B,A,A,B,A,B,A,A,A,A,B,A,B,A,B,A,B,B,B,A,A,A,B,B,A,B,A,A,A,A,B,B,A,A,B,B,A,A,B,A,A,A,A,A,B,A,B,B,B,A,B,B,A,A,A,A,B,A,A,A,A,B,B,B,B,A,A,A,A,B,B,A,B,B,A,A,A,A,B,B,B,B,A,A,B,A,B,A,B,A,A,B,B,A,A,B,A,A,A,A,B,A,-,A,B,-,A,A,A,B,B,B,A,B,A,A,A,B,A,B,B,A,B,B,A,A,A,-,A,A,A,B
S30_1838188,,-,A,-,B,B,B,A,B,A,-,B,A,A,A,B,B,A,B,B,B,A,A,A,B,B,A,B,B,B,A,B,B,-,A,B,-,-,B,A,A,B,A,B,A,A,A,A,B,A,B,-,B,A,B,B,B,A,A,A,B,-,A,-,A,A,A,A,B,B,A,A,B,B,-,A,B,A,A,A,A,A,B,A,B,B,B,A,B,B,A,A,A,A,B,A,A,A,A,B,-,B,B,A,A,A,A,B,B,A,B,B,-,A,A,A,B,B,B,B,A,-,B,A,B,A,-,A,A,B,B,A,A,B,A,A,-,A,B,-,A,A,B,-,A,-,A,B,B,-,A,B,A,-,A,-,-,B,B,A,B,B,A,A,A,-,A,A,A,-
S30_1839571,,A,A,-,B,B,B,A,B,A,A,B,A,A,A,B,B,A,B,B,B,A,A,A,B,B,A,B,B,B,A,-,B,B,A,B,-,A,B,A,A,B,A,B,A,A,A,A,B,A,B,A,B,A,B,B,B,A,A,A,B,B,A,-,A,A,A,A,B,B,A,A,B,B,A,A,B,A,A,A,A,A,B,A,B,B,B,A,B,B,A,A,A,A,B,A,A,A,A,B,B,B,B,A,A,A,A,B,B,A,B,B,A,A,A,A,B,B,B,B,A,A,B,A,B,A,B,A,A,B,B,A,A,B,A,A,A,A,-,A,-,-,B,-,A,A,B,B,B,B,A,B,A,A,A,B,A,B,B,A,B,B,A,A,A,-,A,A,A,B
[truncated: 1,502,587 more chars]
